# Supplementary material for: Comparative Meta-Analysis of Transcriptomics Data during Cellular Senescence and In Vivo Tissue Ageing
Source: Oxid Med Cell Longev. 2015 Apr 21;2015:732914. doi: 10.1155/2015/732914 (PMC4419258; doi:10.1155/2015/732914)
Supplement: Supplementary file 1 — Supplementary material includes five (5) excel files termed as Supplementary Tables S1-S5. The S1 file includes one (1) spreadsheet; a summary Table of analyzed transcriptomics data and experimental conditions. The S2 file includes nine (9) spreadsheets: (1) a list of 390 fully annotated DEGs extracted from Statistical analysis (p-value≤0.05, FDR≤0.05, F.C filtering >0.26 and <-0.26, in log2 scale) of nervous tissue; (2) a list of DEGs in nervous tissue with gene expression-fold change >=1.5 fold; (3) a summary Table with the results of functional analysis of DEGs in nervous tissue by "Stranger" based on GO terms; the (4), (5), (6) Tables with the results of functional analysis of DEGs in nervous tissue with "Stranger" based on Cellular Location, Function and Biological Process of GO tree, respectively; (7) a list of DEGs enriched in Functions and Biological Processes found to be overrepresented in nervous tissue transcriptomics data; (8) a Table with the genes and GO terms associated with DEGs enriched in Biological Processes found to be over-represented in nervous tissue transcriptomics data - "Gorevenge output"; (9) a list of DEGs in nervous tissue transcriptomic data characterized as hub-genes from "Gorevenge" (in a descending order of linked GO terms). The S3 file includes seven (7) spreadsheets: the (1), (2) Tables with the enrichment score of Functions and Biological Processes over-represented in males muscle tissue, respectively (the number of enriched up- or down-regulated genes is also shown); the (3), (4) Tables with the enrichment score of Functions and Biological Processes over-represented in females muscle tissue, respectively (the number of enriched up- or down-regulated genes is also shown); (5) a list of genes enriched in over-represented Biological Processes of females muscle tissue with the common genes and Biological Processes to be highlighted; (6) a Table with the enriched up- or down- regulated genes in over-represented Biological Processes of [file 732914.f1.zip]

Archive with 6 entries (5 files):
- 732914.f1/
- 732914.f1/732914 Voutetakis_et_al_Suppl_Table_S1.xls
- 732914.f1/732914 Voutetakis_et_al_Suppl_Table_S2.xls
- 732914.f1/732914 Voutetakis_et_al_Suppl_Table_S3.xls
- 732914.f1/732914 Voutetakis_et_al_Suppl_Table_S4.xls
- 732914.f1/732914 Voutetakis_et_al_Suppl_Table_S5.xls
