# Supplementary material for: Comparative Meta-Analysis of Transcriptomics Data during Cellular Senescence and In Vivo Tissue Ageing
Source: Oxid Med Cell Longev. 2015 Apr 21;2015:732914. doi: 10.1155/2015/732914 (PMC4419258; doi:10.1155/2015/732914)
Supplement: Supplementary file 1 — Supplementary material includes five (5) excel files termed as Supplementary Tables S1-S5. The S1 file includes one (1) spreadsheet; a summary Table of analyzed transcriptomics data and experimental conditions. The S2 file includes nine (9) spreadsheets: (1) a list of 390 fully annotated DEGs extracted from Statistical analysis (p-value≤0.05, FDR≤0.05, F.C filtering >0.26 and <-0.26, in log2 scale) of nervous tissue; (2) a list of DEGs in nervous tissue with gene expression-fold change >=1.5 fold; (3) a summary Table with the results of functional analysis of DEGs in nervous tissue by "Stranger" based on GO terms; the (4), (5), (6) Tables with the results of functional analysis of DEGs in nervous tissue with "Stranger" based on Cellular Location, Function and Biological Process of GO tree, respectively; (7) a list of DEGs enriched in Functions and Biological Processes found to be overrepresented in nervous tissue transcriptomics data; (8) a Table with the genes and GO terms associated with DEGs enriched in Biological Processes found to be over-represented in nervous tissue transcriptomics data - "Gorevenge output"; (9) a list of DEGs in nervous tissue transcriptomic data characterized as hub-genes from "Gorevenge" (in a descending order of linked GO terms). The S3 file includes seven (7) spreadsheets: the (1), (2) Tables with the enrichment score of Functions and Biological Processes over-represented in males muscle tissue, respectively (the number of enriched up- or down-regulated genes is also shown); the (3), (4) Tables with the enrichment score of Functions and Biological Processes over-represented in females muscle tissue, respectively (the number of enriched up- or down-regulated genes is also shown); (5) a list of genes enriched in over-represented Biological Processes of females muscle tissue with the common genes and Biological Processes to be highlighted; (6) a Table with the enriched up- or down- regulated genes in over-represented Biological Processes of [file 732914.f1.zip › 732914.f1/732914 Voutetakis_et_al_Suppl_Table_S1.xls]

## Sheet: Sheet1
Table S1: Analyzed transcriptomics data and experimental conditions
Datasets/Series	Number of samples	biopsy or cell-based	Microarray platform	Number of probe sets analyzed in Armada	Experimental conditions	Statistical test	p-value threshold	FDR threshold	Number of DEGs
GDS707	30	biopsy	Affy. HG_U95Av2	8509	young;middle;late;old;extreme_old	1-way ANOVA	0.05	0.1	653
	21	biopsy	Affy. HG_U95Av2	7777	young vs. old	Student t-Test	0.02	0.05	815
GDS473	15	biopsy	Affy. HG-U133B	7591	young vs. old	Student t-Test	0.02	0.1	774
GDS472	15	biopsy	Affy. HG-U133A	10067	young vs. old	Student t-Test	0.01	0.05	1058
GDS288	15	biopsy	Affy. HG-U133B	6953	young vs. old	Student t-Test	0.006	0.1	228
GDS287	15	biopsy	Affy. HG-U133A	10076	young vs. old	Student t-Test	0.03	0.1	1424
GDS156	12	biopsy	Affy. HG_U95	4936	young vs. old	Student t-Test	0.03	0.1	346
GSE5086	81	biopsy	Affy. HG_U133_Plus_2.0	54613	young;middle;old;very_old	1-way ANOVA	0.005	Bonferroni	9510
GSE5086	16				young vs. old	Student t-Test	0.001	0.1	534
GSE24810	15 (48)	cell-based	Affy. HG_U133_Plus_2.0	22969	HMF3A(33.5°C vs.38°C)	Student t-Test	9e-05	0.001	1.792
				23674	HMF3S (33.5°C vs.38°C)	Student t-Test	0.0005	0.01	1.157
				22969	HMF3A (33.5°C vs. Quiescent)	Student t-Test	0.0001	0.001	1.142
GSE19018	12	cell-based	Affy. HG_U133_Plus_2.0	19115	Imr90(20%O2) young vs. senescent	Student t-Test	0.0002	0.01	310
				19479	Imr90(3%O2) young vs. old	Student t-Test	0.002	0.1	221
GSE15829	16	cell-based	CodeLink HWG Bioarray	20474	young vs. old	Student t-Test	0.05	0.07	1.318
GSE13496	30	cell-based	Affy. HG-U133A	9100	BMCD34+ (young vs. senescent)	Student t-Test	0.008	0.1	71
				6949	PBCD34+38-(young vs. senescent)	Student t-Test	0.05	0.1	232
				9245	T-cells(young vs. senescent)	Student t-Test	0.02	0.1	137
GSE4352	21	cell-based	Cohen-31K1a	30971	WS1(young vs. senescent)	Student t-Test	0.03	0.1	875
					WS1(quiescent vs. senescent)	Student t-Test	0.0003	0.1	10
					WS1(young vs. quiescent)	Student t-Test	0.03	0.1	1.062
					WI38(young vs. senescent)	Student t-Test	0.001	0.1	44
					WI38(quiescent vs. senescent)	Student t-Test	0.02	0.1	307
					WI38(young vs. quiescent)	Student t-Test	0.007	0.06	358
					BJ(young vs. senescent)	Student t-Test	0.007	0.05	1.308
					BJ(quiescent vs. senescent)	Student t-Test	0.009	0.1	5
					BJ(young vs. quiescent)	Student t-Test	0.008	0.1	576
					184(young vs. senescent)	Student t-Test	0.05	0.1	592
					184(quiescent vs. senescent)	Student t-Test	0.0002	0.1	10
					184(young vs. quiescent)	Student t-Test	0.03	0.1	813
					48R(young vs. senescent)	Student t-Test	0.01	0.1	61
					48R(quiescent vs. senescent)	Student t-Test	0.005	0.1	175
					48R(young vs. quiescent)	Student t-Test	0.03	0.1	1147
