# Supplementary material for: Comparative Meta-Analysis of Transcriptomics Data during Cellular Senescence and In Vivo Tissue Ageing
Source: Oxid Med Cell Longev. 2015 Apr 21;2015:732914. doi: 10.1155/2015/732914 (PMC4419258; doi:10.1155/2015/732914)
Supplement: Supplementary file 1 — Supplementary material includes five (5) excel files termed as Supplementary Tables S1-S5. The S1 file includes one (1) spreadsheet; a summary Table of analyzed transcriptomics data and experimental conditions. The S2 file includes nine (9) spreadsheets: (1) a list of 390 fully annotated DEGs extracted from Statistical analysis (p-value≤0.05, FDR≤0.05, F.C filtering >0.26 and <-0.26, in log2 scale) of nervous tissue; (2) a list of DEGs in nervous tissue with gene expression-fold change >=1.5 fold; (3) a summary Table with the results of functional analysis of DEGs in nervous tissue by "Stranger" based on GO terms; the (4), (5), (6) Tables with the results of functional analysis of DEGs in nervous tissue with "Stranger" based on Cellular Location, Function and Biological Process of GO tree, respectively; (7) a list of DEGs enriched in Functions and Biological Processes found to be overrepresented in nervous tissue transcriptomics data; (8) a Table with the genes and GO terms associated with DEGs enriched in Biological Processes found to be over-represented in nervous tissue transcriptomics data - "Gorevenge output"; (9) a list of DEGs in nervous tissue transcriptomic data characterized as hub-genes from "Gorevenge" (in a descending order of linked GO terms). The S3 file includes seven (7) spreadsheets: the (1), (2) Tables with the enrichment score of Functions and Biological Processes over-represented in males muscle tissue, respectively (the number of enriched up- or down-regulated genes is also shown); the (3), (4) Tables with the enrichment score of Functions and Biological Processes over-represented in females muscle tissue, respectively (the number of enriched up- or down-regulated genes is also shown); (5) a list of genes enriched in over-represented Biological Processes of females muscle tissue with the common genes and Biological Processes to be highlighted; (6) a Table with the enriched up- or down- regulated genes in over-represented Biological Processes of [file 732914.f1.zip › 732914.f1/732914 Voutetakis_et_al_Suppl_Table_S2.xls]

## Sheet: DEGs_nervous
Table S2: List of 390 fully annotated DEGs extracted from Statistical analysis (p-value≤0.05, FDR≤0.05, F.C filtering >0.26 and <-0.26, in log2 scale) of nervous tissue transcriptomics data
Gene_ID	p-value	FDR	Fold Change (log2) old vs young	Fold Change (natural) old vs young	Affy_set_ID	Gene title
HBB	3.57696e-05	0.00471418	1.22971	2.3452	31687_f_at	hemoglobin, beta
HBA2	5.73488e-05	0.00546183	1.20928	2.31222	31525_s_at	hemoglobin, alpha 2///hemoglobin, alpha 1
EFEMP1	0.00167765	0.025228	0.930865	1.90642	32551_at	EGF-containing fibulin-like extracellular matrix protein 1
RHOBTB3	0.00308889	0.0258272	0.918569	1.89024	32215_i_at	Rho-related BTB domain containing 3
DDIT4	0.00129796	0.021332	0.912218	1.88194	39827_at	DNA-damage-inducible transcript 4
WWTR1	0.000166018	0.00742942	0.898923	1.86467	33876_at	WW domain containing transcription regulator 1
S1PR1	0.00538449	0.0456614	0.876704	1.83618	587_at	sphingosine-1-phosphate receptor 1
PLOD2	0.00102725	0.0196677	0.869715	1.8273	34795_at	procollagen-lysine, 2-oxoglutarate 5-dioxygenase 2
LAMP2	7.26127e-05	0.0053884	0.864183	1.82031	38402_at	lysosomal-associated membrane protein 2
CFHR1	0.00571603	0.0472854	0.861186	1.81653	32249_at	complement factor H-related 1///complement factor H
FGF1	6.42146e-05	0.00542075	0.84278	1.7935	996_at	fibroblast growth factor 1 (acidic)
PDE4DIP	0.00116017	0.0174838	0.821173	1.76684	33364_at	phosphodiesterase 4D interacting protein
MYO10	0.000189644	0.00782662	0.804546	1.7466	35362_at	myosin X
SERINC5	0.000228765	0.00858288	0.80406	1.74601	34840_at	serine incorporator 5
CLIC4	0.000708384	0.0157554	0.798569	1.73938	33891_at	chloride intracellular channel 4
HSPA2	0.00477337	0.039907	0.791771	1.7312	36925_at	heat shock 70kDa protein 2
MT1G	0.00296124	0.032931	0.791424	1.73078	926_at	metallothionein 1G
ID4	0.00405848	0.0391545	0.785005	1.7231	41536_at	inhibitor of DNA binding 4, dominant negative helix-loop-helix protein
RGS20	0.00517044	0.044662	0.768938	1.70402	41086_at	regulator of G-protein signaling 20
TXNIP	0.00113136	0.0199157	0.765783	1.70029	31508_at	thioredoxin interacting protein
APOD	1.78534e-05	0.00331566	0.763591	1.69771	36681_at	apolipoprotein D
SPON1	6.14345e-05	0.00570468	0.743956	1.67476	35277_at	spondin 1, extracellular matrix protein
ITPKB	0.000100657	0.00603019	0.739727	1.66986	37272_at	inositol 1,4,5-trisphosphate 3-kinase B
LRIG1	8.4568e-05	0.00560914	0.726526	1.65465	34800_at	leucine-rich repeats and immunoglobulin-like domains 1
ZHX2	0.000154902	0.00710317	0.725141	1.65306	41503_at	zinc fingers and homeoboxes 2
ZCCHC24	4.85638e-05	0.00501059	0.708956	1.63462	34303_at	zinc finger, CCHC domain containing 24
HEBP2	0.00115055	0.0200634	0.705517	1.63073	41454_at	heme binding protein 2
VWF	0.00300316	0.0331985	0.703575	1.62854	607_s_at	von Willebrand factor
PDLIM5	0.000977883	0.0168039	0.69795	1.6222	37366_at	PDZ and LIM domain 5
PIP4K2A	0.000700866	0.0157772	0.696632	1.62072	35310_at	phosphatidylinositol-5-phosphate 4-kinase, type II, alpha
VCAN	0.000511926	0.0130669	0.695197	1.61911	38111_at	versican
PALLD	0.000457682	0.0126864	0.688077	1.61113	41191_at	palladin, cytoskeletal associated protein
RASSF2	4.32956e-05	0.00502542	0.687416	1.6104	37598_at	Ras association (RalGDS/AF-6) domain family member 2
CRYAB	0.00211938	0.0238509	0.685433	1.60818	32242_at	crystallin, alpha B
AHNAK	0.000134605	0.00684884	0.672399	1.59372	37027_at	AHNAK nucleoprotein
ZEB2	0.00267103	0.0313958	0.663024	1.5834	35681_r_at	zinc finger E-box binding homeobox 2
HLA-DPA1	0.00543199	0.0458548	0.661616	1.58185	38833_at	major histocompatibility complex, class II, DP alpha 1
GNG12	0.00144733	0.0228758	0.66052	1.58065	38079_at	guanine nucleotide binding protein (G protein), gamma 12
SEPT10	0.00268407	0.0311546	0.657963	1.57785	38033_at	septin 10
TAX1BP3	0.000535377	0.0134362	0.653897	1.57341	39416_at	Tax1 (human T-cell leukemia virus type I) binding protein 3
WNK1	2.70904e-05	0.00437488	0.651698	1.57102	32185_at	WNK lysine deficient protein kinase 1
ACTL6A	0.00460621	0.0418311	0.649623	1.56876	41278_at	actin-like 6A
METTL7A	0.00046062	0.0124882	0.649545	1.56867	38717_at	methyltransferase like 7A
KANK1	9.8108e-05	0.00597383	0.647671	1.56664	37225_at	KN motif and ankyrin repeat domains 1
TMEM123	1.25538e-05	0.00274288	0.642576	1.56111	40803_at	transmembrane protein 123
LRP4	0.00194948	0.0270186	0.642435	1.56096	36059_at	low density lipoprotein receptor-related protein 4
RDX	1.91827e-06	0.00178126	0.64221	1.56072	34887_at	radixin
NEK7	0.000822523	0.0167863	0.636828	1.55491	34752_at	NIMA (never in mitosis gene a)-related kinase 7
VIM	0.00117988	0.0203835	0.633233	1.55104	34091_s_at	vimentin
FGFR3	0.000384415	0.0114227	0.632415	1.55016	31805_at	fibroblast growth factor receptor 3
SEPP1	0.000424944	0.0119574	0.632364	1.5501	34363_at	selenoprotein P, plasma, 1
BBOX1	0.000974611	0.0189529	0.63136	1.54902	38339_at	butyrobetaine (gamma), 2-oxoglutarate dioxygenase (gamma-butyrobetaine hydroxylase) 1
CEBPD	0.00263155	0.0314289	0.623162	1.54025	1052_s_at	CCAAT/enhancer binding protein (C/EBP), delta
RAMP1	8.83447e-05	0.00565759	0.618733	1.53553	35668_at	receptor (G protein-coupled) activity modifying protein 1
RIN2	4.32047e-05	0.00517664	0.614963	1.53152	36550_at	Ras and Rab interactor 2
GJA1	0.00318095	0.0341475	0.605087	1.52107	32531_at	gap junction protein, alpha 1, 43kDa
GAB2	0.00372823	0.0368293	0.604383	1.52033	35253_at	GRB2-associated binding protein 2
NPC2	0.00307551	0.0334018	0.602022	1.51784	39345_at	Niemann-Pick disease, type C2
DPYSL3	7.82477e-05	0.00558917	0.590194	1.50545	36149_at	dihydropyrimidinase-like 3
ERBB3	0.000747339	0.0159532	0.583372	1.49835	1585_at	v-erb-b2 erythroblastic leukemia viral oncogene homolog 3 (avian)
PIK3C2A	0.000120262	0.00647376	0.582522	1.49746	36509_at	phosphoinositide-3-kinase, class 2, alpha polypeptide
MT1E	0.00339316	0.0348157	0.573591	1.48822	36130_f_at	metallothionein 1E
TWF1	0.00128258	0.021173	0.571736	1.48631	1064_at	twinfilin, actin-binding protein, homolog 1 (Drosophila)
SEPT4	0.00328624	0.0344806	0.571209	1.48577	32056_at	septin 4
SYPL1	0.000405808	0.0116845	0.565529	1.47993	38075_at	synaptophysin-like 1
PHF3	0.000564174	0.0137863	0.565175	1.47957	37694_at	PHD finger protein 3
TIPARP	0.000478973	0.012799	0.562949	1.47729	39411_at	TCDD-inducible poly(ADP-ribose) polymerase
MSN	0.000660255	0.0154239	0.560103	1.47437	40771_at	moesin
EFHD1	0.000733792	0.0159388	0.55964	1.4739	33878_at	EF-hand domain family, member D1
C3orf63	0.00353546	0.0353957	0.551879	1.46599	33457_at	chromosome 3 open reading frame 63
GPR137B	0.00474095	0.0426377	0.549746	1.46383	32083_at	G protein-coupled receptor 137B
PMP22	0.000405156	0.0117568	0.549259	1.46333	38653_at	peripheral myelin protein 22
LEPROT	4.7242e-05	0.00501347	0.547292	1.46134	33830_at	leptin receptor overlapping transcript///leptin receptor
GPRC5B	0.000304485	0.0100084	0.544799	1.45882	40240_at	G protein-coupled receptor, family C, group 5, member B
NFE2L2	0.000900784	0.0177338	0.54039	1.45437	36235_at	nuclear factor (erythroid-derived 2)-like 2
FADS1	0.00266711	0.0217723	0.536472	1.45042	39373_at	fatty acid desaturase 1
CETN3	0.00119525	0.0203649	0.536306	1.45025	35232_f_at	centrin, EF-hand protein, 3
IQGAP1	0.000665672	0.0154532	0.535749	1.44969	1825_at	IQ motif containing GTPase activating protein 1
TMEM47	0.00017705	0.00764674	0.533878	1.44782	37958_at	transmembrane protein 47
WFS1	8.14364e-05	0.00560149	0.530594	1.44452	35164_at	Wolfram syndrome 1 (wolframin)
SFRS16	0.0058232	0.0477466	0.524042	1.43798	36005_at	splicing factor, arginine/serine-rich 16
UNG	0.00522124	0.0447883	0.523056	1.437	37686_s_at	uracil-DNA glycosylase
FERMT2	0.00073896	0.0158655	0.522269	1.43621	36577_at	fermitin family member 2
RNASE1	0.00289402	0.0322802	0.51754	1.43151	37402_at	ribonuclease, RNase A family, 1 (pancreatic)
PRDX6	3.25324e-05	0.00431555	0.51506	1.42905	39354_at	peroxiredoxin 6
TOB1	0.000547628	0.0135604	0.514842	1.42884	40631_at	transducer of ERBB2, 1
VAT1	0.000262051	0.00909665	0.51431	1.42831	40147_at	vesicle amine transport protein 1 homolog (T. californica)
ITGB1	3.72691e-05	0.00477342	0.512339	1.42636	32808_at	integrin, beta 1 (fibronectin receptor, beta polypeptide, antigen CD29 includes MDF2, MSK12)
DDR1	0.000731133	0.0135808	0.508871	1.42294	1007_s_at	discoidin domain receptor tyrosine kinase 1
KLC1	0.00095253	0.0189198	0.508126	1.4222	39057_at	kinesin light chain 1
GATM	0.00449501	0.0398862	0.508109	1.42218	36595_s_at	glycine amidinotransferase (L-arginine:glycine amidinotransferase)
YES1	0.00556888	0.0464822	0.506402	1.4205	1674_at	v-yes-1 Yamaguchi sarcoma viral oncogene homolog 1
DHRS3	0.00335957	0.0346625	0.500758	1.41496	40782_at	dehydrogenase/reductase (SDR family) member 3
RAP1B	6.48167e-05	0.00534999	0.497512	1.41178	40146_at	RAP1B, member of RAS oncogene family
MYL12A	0.00279152	0.0319034	0.49537	1.40968	33447_at	myosin, light chain 12A, regulatory, non-sarcomeric
MT1B	0.00590585	0.0480004	0.494938	1.40926	609_f_at	metallothionein 1B
MAL	0.000308081	0.0100378	0.493939	1.40828	38051_at	mal, T-cell differentiation protein
SCP2	8.93449e-05	0.00562466	0.490145	1.40459	36688_at	sterol carrier protein 2
ADD3	0.00330974	0.0339071	0.48911	1.40358	33102_at	adducin 3 (gamma)
FYN	0.00392587	0.0381339	0.48688	1.40141	40479_at	FYN oncogene related to SRC, FGR, YES
ANP32B	0.000542131	0.0135144	0.486583	1.40112	38479_at	acidic (leucine-rich) nuclear phosphoprotein 32 family, member B
BCL2	0.00120488	0.0204352	0.485547	1.40012	1909_at	B-cell CLL/lymphoma 2
S100B	0.000247507	0.00892542	0.483854	1.39847	235_at	S100 calcium binding protein B
TSC22D4	0.000391743	0.0115481	0.481154	1.39586	38641_at	TSC22 domain family, member 4
GNE	0.00520238	0.0448336	0.480665	1.39539	36515_at	glucosamine (UDP-N-acetyl)-2-epimerase/N-acetylmannosamine kinase
ANXA5	0.00261081	0.0314849	0.478888	1.39367	37747_at	annexin A5
MCL1	0.00534893	0.0454911	0.477031	1.39188	277_at	myeloid cell leukemia sequence 1 (BCL2-related)
GSN	0.000853787	0.0173291	0.476907	1.39176	32612_at	gelsolin
ITM2A	0.00378576	0.0371016	0.476697	1.39155	40775_at	integral membrane protein 2A
FGFR2	0.000220105	0.00834225	0.476499	1.39136	1363_at	fibroblast growth factor receptor 2
PTP4A2	0.00266864	0.0314672	0.474875	1.3898	38415_at	protein tyrosine phosphatase type IVA, member 2
MLC1	0.000632873	0.0148778	0.473902	1.38886	36897_at	megalencephalic leukoencephalopathy with subcortical cysts 1
PON2	0.000376117	0.0112663	0.47338	1.38836	40504_at	paraoxonase 2
NFKBIA	0.000350615	0.0107628	0.469341	1.38448	1461_at	nuclear factor of kappa light polypeptide gene enhancer in B-cells inhibitor, alpha
CSRP1	0.00286428	0.0323369	0.468452	1.38362	38700_at	cysteine and glycine-rich protein 1
PODXL	0.000149473	0.00721024	0.46799	1.38318	40434_at	podocalyxin-like
RBL2	0.00352307	0.035367	0.463948	1.37931	32597_at	retinoblastoma-like 2 (p130)
AHCYL2	0.000718874	0.0157066	0.463873	1.37924	36066_at	adenosylhomocysteinase-like 2
ABCA2	0.00335683	0.0347307	0.46102	1.37651	38313_at	ATP-binding cassette, sub-family A (ABC1), member 2
CEP170	0.00333589	0.0346104	0.460191	1.37572	33893_r_at	centrosomal protein 170kDa
AMOT	0.000805976	0.0166314	0.459991	1.37553	38286_at	angiomotin
VAMP3	0.000235159	0.00873453	0.455311	1.37108	35783_at	vesicle-associated membrane protein 3 (cellubrevin)
QKI	0.0033317	0.0346638	0.454865	1.37065	39760_at	quaking homolog, KH domain RNA binding (mouse)
OLIG2	0.000547441	0.0119226	0.454689	1.37049	40624_at	oligodendrocyte lineage transcription factor 2
LPIN1	0.00109506	0.0196492	0.453646	1.3695	38098_at	lipin 1
ADIPOR2	0.00231085	0.0296997	0.452578	1.36848	39045_at	adiponectin receptor 2
ALDH9A1	6.01229e-06	0.00186096	0.452247	1.36817	33899_at	aldehyde dehydrogenase 9 family, member A1
STOM	0.00118464	0.0203709	0.449286	1.36536	40419_at	stomatin
MAP3K5	0.000193031	0.00787889	0.441172	1.35771	1327_s_at	mitogen-activated protein kinase kinase kinase 5
NDRG1	0.000678132	0.0156447	0.440697	1.35726	36933_at	N-myc downstream regulated 1
RGN	0.00109395	0.0197247	0.440657	1.35722	942_at	regucalcin (senescence marker protein-30)
AHCYL1	0.00450139	0.0372445	0.438099	1.35482	34727_at	adenosylhomocysteinase-like 1
LONP2	0.00491469	0.0434636	0.437401	1.35416	32161_at	lon peptidase 2, peroxisomal
SH3GLB1	0.000158296	0.00717027	0.437123	1.3539	39691_at	SH3-domain GRB2-like endophilin B1
MFAP3L	0.00262279	0.0315271	0.431333	1.34848	33241_at	microfibrillar-associated protein 3-like
PTTG1IP	0.00164516	0.0248401	0.429992	1.34723	39003_at	pituitary tumor-transforming 1 interacting protein
ALDH4A1	0.00287558	0.0322683	0.429673	1.34693	37331_g_at	aldehyde dehydrogenase 4 family, member A1
PICALM	0.000256147	0.00897556	0.429032	1.34633	37685_at	phosphatidylinositol binding clathrin assembly protein
TLN1	0.0037945	0.0370894	0.428789	1.3461	32166_at	talin 1
ITGA6	0.00525648	0.0449867	0.426358	1.34384	41266_at	integrin, alpha 6
ALDH7A1	0.00555988	0.046722	0.425842	1.34336	36132_at	aldehyde dehydrogenase 7 family, member A1
LOC440926	0.002201	0.0289901	0.422688	1.34042	31510_s_at	H3 histone, family 3A pseudogene///H3 histone, family 3B (H3.3B)///H3 histone, family 3A
TLE4	0.00339763	0.0346699	0.422227	1.33999	38364_at	transducin-like enhancer of split 4 (E(sp1) homolog, Drosophila)
TPD52L2	0.00135267	0.0219399	0.417504	1.33561	40076_at	tumor protein D52-like 2
NEBL	0.00126898	0.0212316	0.416622	1.3348	34873_at	nebulette
CAT	0.00413875	0.0395183	0.415982	1.33421	37009_at	catalase
GIPC1	0.000250676	0.00895279	0.413961	1.33234	35756_at	GIPC PDZ domain containing family, member 1
TP53BP2	0.00472793	0.0388689	0.406311	1.32529	1860_at	tumor protein p53 binding protein, 2
PPAP2A	0.000758588	0.0159188	0.403922	1.3231	34797_at	phosphatidic acid phosphatase type 2A
HTRA1	0.00432636	0.0399099	0.403204	1.32244	718_at	HtrA serine peptidase 1
KIAA1033	0.00189547	0.0266681	0.402043	1.32138	41651_at	KIAA1033
NDP	0.000170421	0.00753569	0.399049	1.31864	39623_at	Norrie disease (pseudoglioma)
PHLPP1	0.0010638	0.0196581	0.397298	1.31704	35719_at	PH domain and leucine rich repeat protein phosphatase 1
SEPT2	0.00360219	0.0357745	0.395355	1.31527	40281_at	septin 2
PLXNC1	0.00483661	0.0429777	0.394362	1.31436	32193_at	plexin C1
HADHB	0.00248266	0.0306358	0.393926	1.31396	39741_at	hydroxyacyl-CoA dehydrogenase/3-ketoacyl-CoA thiolase/enoyl-CoA hydratase (trifunctional protein), beta subunit
TOR1AIP1	0.00103984	0.0196055	0.392762	1.3129	40832_s_at	torsin A interacting protein 1
TRAM1	7.54399e-05	0.00571852	0.39254	1.3127	34796_at	translocation associated membrane protein 1
MAOA	0.00538967	0.0434498	0.390516	1.31086	41770_at	monoamine oxidase A
MTSS1	0.00243975	0.0303076	0.388698	1.30921	37363_at	metastasis suppressor 1
KIAA0776	0.00021317	0.00816269	0.38552	1.30633	36474_at	KIAA0776
HRSP12	0.00618117	0.0494802	0.381071	1.30231	32173_at	heat-responsive protein 12
COMT	0.000135707	0.00681158	0.370843	1.29311	34651_at	catechol-O-methyltransferase
CADM1	0.00151103	0.0233852	0.370427	1.29274	35829_at	cell adhesion molecule 1
SOX10	0.00245617	0.03041	0.369136	1.29158	36018_at	SRY (sex determining region Y)-box 10
DARS	0.00514393	0.0445366	0.366939	1.28961	32615_at	aspartyl-tRNA synthetase
ZHX3	0.000178457	0.00753232	0.363291	1.28636	40461_at	zinc fingers and homeoboxes 3
HNRNPH3	0.00169326	0.0252582	0.36088	1.28421	41283_at	heterogeneous nuclear ribonucleoprotein H3 (2H9)
CBFB	0.00121566	0.0204315	0.354552	1.27859	41175_at	core-binding factor, beta subunit
RHOC	0.00498244	0.0438539	0.353584	1.27773	1395_at	ras homolog gene family, member C
ACTR3	0.00311589	0.0335461	0.350391	1.27491	35271_at	ARP3 actin-related protein 3 homolog (yeast)
POLR2J	0.000576094	0.0139856	0.349356	1.27399	38055_at	polymerase (RNA) II (DNA directed) polypeptide J, 13.3kDa
KLHL21	0.00579654	0.0476331	0.348853	1.27355	37230_at	kelch-like 21 (Drosophila)
TMED10	0.00500145	0.0362249	0.345479	1.27057	35754_at	transmembrane emp24-like trafficking protein 10 (yeast)
ZNF146	0.0012125	0.0204709	0.342135	1.26763	36928_at	zinc finger protein 146
KLHL9	0.00205486	0.0277542	0.342044	1.26755	38674_at	kelch-like 9 (Drosophila)
U2AF1	0.00253168	0.0309324	0.339436	1.26526	36517_at	U2 small nuclear RNA auxiliary factor 1
H1F0	0.00152575	0.0234179	0.335285	1.26163	33386_at	H1 histone family, member 0
KTN1	0.000595821	0.0143706	0.333752	1.26029	32846_s_at	kinectin 1 (kinesin receptor)
TJP2	0.00267534	0.0312486	0.333671	1.26022	36655_at	tight junction protein 2 (zona occludens 2)
SEC11A	0.000605338	0.0145059	0.331561	1.25837	39139_at	SEC11 homolog A (S. cerevisiae)
FNBP1	0.00280483	0.0319571	0.32947	1.25655	40468_at	formin binding protein 1
NSL1	0.0026332	0.0313479	0.329155	1.25628	41335_at	NSL1, MIND kinetochore complex component, homolog (S. cerevisiae)
ZNF24	0.000310456	0.0100272	0.328935	1.25609	32809_at	zinc finger protein 24
RAP1A	0.00230684	0.0297512	0.328295	1.25553	1848_at	RAP1A, member of RAS oncogene family
PTPRT	0.00174115	0.0254614	0.326595	1.25405	39227_at	protein tyrosine phosphatase, receptor type, T
STXBP3	0.000328575	0.0103426	0.323208	1.25111	37962_r_at	syntaxin binding protein 3
HIP1R	0.00252241	0.0309208	0.322022	1.25008	38340_at	huntingtin interacting protein 1 related
ARAP2	4.56873e-05	0.00499109	0.321827	1.24991	39224_at	ArfGAP with RhoGAP domain, ankyrin repeat and PH domain 2
RYBP	0.00339473	0.0347358	0.31874	1.24724	37732_at	RING1 and YY1 binding protein
FNTA	0.00437671	0.040743	0.316833	1.24559	1499_at	farnesyltransferase, CAAX box, alpha
HDDC2	0.0015304	0.0233926	0.315685	1.2446	34359_at	HD domain containing 2
PLS3	0.00243645	0.0303683	0.312477	1.24184	34793_s_at	plastin 3
SLC6A8	0.00458872	0.041877	0.31046	1.2401	40926_at	solute carrier family 6 (neurotransmitter transporter, creatine), member 8
GBAS	0.00110196	0.019678	0.310138	1.23983	39793_at	glioblastoma amplified sequence
TAGLN2	0.00425612	0.0400217	0.308255	1.23821	36678_at	transgelin 2
TBCA	0.00106827	0.0195463	0.308195	1.23816	34773_at	tubulin folding cofactor A
AUTS2	0.00220942	0.0289982	0.30502	1.23544	35648_at	autism susceptibility candidate 2
GYG1	0.00283636	0.0321193	0.304112	1.23466	40876_at	glycogenin 1
SELENBP1	0.0056444	0.046797	0.302912	1.23363	37405_at	selenium binding protein 1
CSTB	0.00491341	0.043556	0.301874	1.23274	35816_at	cystatin B (stefin B)
ACOT13	0.00641344	0.0425589	0.301863	1.23274	41057_at	acyl-CoA thioesterase 13
STX6	0.000532317	0.0134503	0.299402	1.23063	41663_at	syntaxin 6
ALDH5A1	0.00132325	0.0216518	0.298598	1.22995	41790_at	aldehyde dehydrogenase 5 family, member A1
CFDP1	0.00288465	0.0322726	0.298112	1.22953	38664_at	craniofacial development protein 1
ECH1	0.00204387	0.0277065	0.297531	1.22904	32756_at	enoyl CoA hydratase 1, peroxisomal
SERP1	0.00338859	0.0348651	0.297191	1.22875	37035_at	stress-associated endoplasmic reticulum protein 1
DHRS7	0.00267918	0.0311953	0.296544	1.2282	39814_s_at	dehydrogenase/reductase (SDR family) member 7
CAPN2	0.000416481	0.0118087	0.295739	1.22751	37001_at	calpain 2, (m/II) large subunit
DOCK1	0.00527666	0.0450556	0.288672	1.22152	37638_at	dedicator of cytokinesis 1
TAX1BP1	0.00560477	0.0466749	0.287295	1.22035	35279_at	Tax1 (human T-cell leukemia virus type I) binding protein 1
NRIP1	0.0055624	0.0466377	0.28718	1.22025	40088_at	nuclear receptor interacting protein 1
WBP4	0.000114898	0.00636969	0.286108	1.21935	35213_at	WW domain binding protein 4 (formin binding protein 21)
PIKFYVE	0.00510794	0.044432	0.285614	1.21893	32085_at	phosphoinositide kinase, FYVE finger containing
BCL2L1	0.000923619	0.0185438	0.28224	1.21608	34742_at	BCL2-like 1
LOC653354	0.00270103	0.0312538	0.280739	1.21482	38440_s_at	armadillo repeat containing, X-linked 6 pseudogene///armadillo repeat containing, X-linked 6
PSIP1	0.000693329	0.0158966	0.279679	1.21393	39243_s_at	PC4 and SFRS1 interacting protein 1
GTF2H5	0.0018842	0.0267119	0.279542	1.21381	39162_at	general transcription factor IIH, polypeptide 5
ASAH1	0.00628109	0.049744	0.273075	1.20838	461_at	N-acylsphingosine amidohydrolase (acid ceramidase) 1
MAP4	0.00393307	0.0382426	0.269167	1.20511	33850_at	microtubule-associated protein 4
RUFY3	0.00607826	0.0490795	0.264422	1.20115	38024_at	RUN and FYVE domain containing 3
MID1	0.00586654	0.0478905	0.262269	1.19936	34296_at	midline 1 (Opitz/BBB syndrome)
MEF2D	0.00109116	0.0197704	-0.261362	0.8343	35434_at	myocyte enhancer factor 2D
USP12	0.00416365	0.0395527	-0.261861	0.834011	34803_at	ubiquitin specific peptidase 12
PHF21A	0.00194482	0.027055	-0.272879	0.827666	39472_s_at	PHD finger protein 21A
ILF3	0.00394258	0.0382349	-0.281735	0.822601	40845_at	interleukin enhancer binding factor 3, 90kDa
NUPL2	0.00201038	0.0274529	-0.282358	0.822246	32639_at	nucleoporin like 2
DGKB	0.00218346	0.0289645	-0.286837	0.819697	31400_at	diacylglycerol kinase, beta 90kDa
DLG3	0.00541372	0.0458047	-0.287265	0.819454	41453_at	discs, large homolog 3 (Drosophila)
MAP4K5	0.0014059	0.0226059	-0.289938	0.817937	34226_at	mitogen-activated protein kinase kinase kinase kinase 5
JMJD1C	0.00463658	0.041902	-0.290637	0.817541	38216_at	jumonji domain containing 1C
TUBGCP4	0.00232302	0.0297532	-0.295579	0.814745	40984_at	tubulin, gamma complex associated protein 4
ARRB2	0.00450058	0.0412755	-0.30142	0.811453	957_at	arrestin, beta 2
PIAS2	0.00263418	0.0312593	-0.301987	0.811135	37432_g_at	protein inhibitor of activated STAT, 2
ZNF85	0.00274523	0.0316666	-0.306788	0.80844	36303_f_at	zinc finger protein 85
CDK8	0.000710356	0.0156123	-0.307141	0.808242	1189_at	cyclin-dependent kinase 8
PPIE	0.000492167	0.0128737	-0.309927	0.806683	34366_g_at	peptidylprolyl isomerase E (cyclophilin E)
GRIK5	0.00173988	0.0255433	-0.318558	0.801871	34904_at	glutamate receptor, ionotropic, kainate 5
INSIG2	0.00443073	0.0411428	-0.321517	0.800228	35833_at	insulin induced gene 2
SLC1A1	0.0034409	0.0349196	-0.325733	0.797893	38268_at	solute carrier family 1 (neuronal/epithelial high affinity glutamate transporter, system Xag), member 1
PTPRR	0.00579524	0.047728	-0.330783	0.795105	1658_g_at	protein tyrosine phosphatase, receptor type, R
C6orf106	0.000735391	0.0158807	-0.334791	0.792899	33806_at	chromosome 6 open reading frame 106
DDX19B	0.000470509	0.0126639	-0.33659	0.791911	33393_at	DEAD (Asp-Glu-Ala-As) box polypeptide 19B
GATA2	0.0033313	0.034757	-0.338361	0.790939	37194_at	GATA binding protein 2
DDX18	0.00503035	0.0441709	-0.342045	0.788922	398_at	DEAD (Asp-Glu-Ala-Asp) box polypeptide 18
WWP1	0.00112861	0.019962	-0.347915	0.785719	783_at	WW domain containing E3 ubiquitin protein ligase 1
PTPRD	0.0047109	0.0424703	-0.350924	0.784081	1256_at	protein tyrosine phosphatase, receptor type, D
RTCD1	0.00198949	0.0272679	-0.353358	0.78276	35195_at	RNA terminal phosphate cyclase domain 1
AKAP10	0.00119273	0.0204156	-0.354161	0.782324	36632_at	A kinase (PRKA) anchor protein 10
WNT10B	0.000521029	0.0135333	-0.357917	0.78029	1018_at	wingless-type MMTV integration site family, member 10B
EP400	0.00611078	0.0492351	-0.364814	0.776569	34815_at	E1A binding protein p400
PRKDC	0.00325739	0.0345685	-0.365326	0.776293	2012_s_at	protein kinase, DNA-activated, catalytic polypeptide
MED6	0.00217631	0.0289731	-0.368073	0.774817	35431_g_at	mediator complex subunit 6
PDS5B	0.00554841	0.0467314	-0.370129	0.773714	32641_at	PDS5, regulator of cohesion maintenance, homolog B (S. cerevisiae)
RAD23A	0.00126998	0.0211529	-0.374441	0.771404	1753_s_at	RAD23 homolog A (S. cerevisiae)
UTRN	0.00446703	0.0412735	-0.375881	0.770635	41390_at	utrophin
ADD2	0.00559169	0.0465679	-0.378773	0.769092	36052_at	adducin 2 (beta)
PSMD8	0.00449497	0.0413261	-0.378791	0.769082	32584_at	proteasome (prosome, macropain) 26S subunit, non-ATPase, 8
MRPL28	0.00233531	0.0298078	-0.379415	0.768749	1550_at	mitochondrial ribosomal protein L28
CDV3	0.00181375	0.026011	-0.381293	0.767749	40618_at	CDV3 homolog (mouse)
UBE2D2	0.00346035	0.0350214	-0.382908	0.76689	832_at	ubiquitin-conjugating enzyme E2D 2 (UBC4/5 homolog, yeast)
FGF7	0.000709471	0.0156857	-0.382955	0.766865	1380_at	fibroblast growth factor 7 (keratinocyte growth factor)
VIP	0.00501809	0.0434185	-0.388901	0.763711	334_s_at	vasoactive intestinal peptide
MAPKAP1	0.00494915	0.0436643	-0.392174	0.76198	1906_at	mitogen-activated protein kinase associated protein 1
ZNF148	0.00415886	0.0396085	-0.392851	0.761623	274_at	zinc finger protein 148
RPS6KA3	0.00191833	0.0267868	-0.393113	0.761485	865_at	ribosomal protein S6 kinase, 90kDa, polypeptide 3
LIG4	0.00326853	0.034392	-0.395317	0.760322	963_at	ligase IV, DNA, ATP-dependent
LPCAT3	0.00326467	0.0344489	-0.396152	0.759882	39245_at	lysophosphatidylcholine acyltransferase 3
PLCL2	0.000277339	0.00945069	-0.403633	0.755952	41796_at	phospholipase C-like 2
GRIK1	0.00622953	0.049547	-0.407997	0.753669	35857_at	glutamate receptor, ionotropic, kainate 1
TANC2	0.0037733	0.0370774	-0.410118	0.752562	32355_at	tetratricopeptide repeat, ankyrin repeat and coiled-coil containing 2
PRKCD	0.000355499	0.0108232	-0.41421	0.75043	32046_at	protein kinase C, delta
GDI2	0.00375517	0.036997	-0.414695	0.750178	777_at	GDP dissociation inhibitor 2
SPOCK1	0.00430843	0.0403095	-0.415328	0.749849	39100_at	sparc/osteonectin, cwcv and kazal-like domains proteoglycan (testican) 1
TCF20	0.00143513	0.0227801	-0.415633	0.749691	33794_g_at	transcription factor 20 (AR1)
SLC25A46	0.00619585	0.0493849	-0.416956	0.749003	37178_at	solute carrier family 25, member 46
OSBP	0.000177759	0.00758913	-0.430375	0.742069	41313_at	oxysterol binding protein
OGT	0.0012726	0.0211019	-0.431991	0.741238	38614_s_at	O-linked N-acetylglucosamine (GlcNAc) transferase (UDP-N-acetylglucosamine:polypeptide-N-acetylglucosaminyl transferase)
ZNF428	0.0006098	0.0145192	-0.433186	0.740624	41083_at	zinc finger protein 428
UBE2D1	0.0007706	0.0159902	-0.444565	0.734806	1164_at	ubiquitin-conjugating enzyme E2D 1 (UBC4/5 homolog, yeast)
PIK3CB	0.00420472	0.0397396	-0.445891	0.734131	1163_at	phosphoinositide-3-kinase, catalytic, beta polypeptide
ELAVL2	0.00519466	0.0437432	-0.447372	0.733378	36410_f_at	ELAV (embryonic lethal, abnormal vision, Drosophila)-like 2 (Hu antigen B)
DNM1L	0.00442386	0.0309516	-0.45376	0.730137	357_at	dynamin 1-like
TAC1	0.00598396	0.0485291	-0.45382	0.730107	36254_at	tachykinin, precursor 1
GRLF1	0.00300642	0.0331358	-0.457832	0.728079	34725_at	glucocorticoid receptor DNA binding factor 1
GLMN	0.000395749	0.0115743	-0.459603	0.727186	39983_at	glomulin, FKBP associated protein
PITPNA	0.00248638	0.0305801	-0.460604	0.726682	352_at	phosphatidylinositol transfer protein, alpha
HLF	0.000699347	0.0159362	-0.464554	0.724695	871_s_at	hepatic leukemia factor
UROS	0.00107905	0.0196467	-0.478632	0.717658	36653_g_at	uroporphyrinogen III synthase
PPM1E	0.000959075	0.0188482	-0.480002	0.716977	32141_at	protein phosphatase, Mg2+/Mn2+ dependent, 1E
ETS2	0.00187174	0.026637	-0.480896	0.716532	1519_at	v-ets erythroblastosis virus E26 oncogene homolog 2 (avian)
ISG20L2	0.00019697	0.00795225	-0.485131	0.714432	40946_at	interferon stimulated exonuclease gene 20kDa-like 2
RNF19B	0.000869379	0.0175497	-0.48585	0.714076	36564_at	ring finger protein 19B
MBNL2	0.0047602	0.0427074	-0.488251	0.712889	33318_at	muscleblind-like 2 (Drosophila)
CDH22	0.000489236	0.0128878	-0.490184	0.711935	35115_at	cadherin 22, type 2
BRD2	0.00183652	0.0213406	-0.498938	0.707628	36209_at	bromodomain containing 2
IQSEC1	0.00240343	0.0302614	-0.501956	0.706149	34831_at	IQ motif and Sec7 domain 1
SLC25A4	0.00148457	0.0232665	-0.504268	0.705018	34988_at	solute carrier family 25 (mitochondrial carrier; adenine nucleotide translocator), member 4
D4S234E	0.00196477	0.0271293	-0.514749	0.699915	936_s_at	DNA segment on chromosome 4 (unique) 234 expressed sequence
FAM49A	0.000205045	0.00818925	-0.515719	0.699444	35143_at	family with sequence similarity 49, member A
CALB2	0.00410561	0.0393029	-0.516464	0.699083	37157_at	calbindin 2
HSPA13	0.00459815	0.0418603	-0.519542	0.697593	38677_at	heat shock protein 70kDa family, member 13
RBP4	0.000950526	0.0189815	-0.52227	0.696276	32552_at	retinol binding protein 4, plasma
ATP2B3	0.00556412	0.0465471	-0.522739	0.696049	32456_s_at	ATPase, Ca++ transporting, plasma membrane 3
PARM1	8.29233e-05	0.00560006	-0.526599	0.694189	41402_at	prostate androgen-regulated mucin-like protein 1
HCCS	1.37724e-05	0.00284195	-0.529016	0.693027	38943_at	holocytochrome c synthase
MAPK1	0.0018848	0.0266188	-0.541443	0.687083	976_s_at	mitogen-activated protein kinase 1
KCNJ3	0.00506361	0.0442538	-0.541805	0.686911	33527_at	potassium inwardly-rectifying channel, subfamily J, member 3
RAB1A	0.00215619	0.0288085	-0.549939	0.683049	1074_at	RAB1A, member RAS oncogene family
E2F4	0.00478425	0.0428198	-0.55275	0.68172	1703_g_at	E2F transcription factor 4, p107/p130-binding
LOC171220	0.00044752	0.012498	-0.565229	0.675848	31605_at	destrin-2 pseudogene
UBE2S	0.0021462	0.0270328	-0.568951	0.674107	40619_at	ubiquitin-conjugating enzyme E2S
TOP2B	0.00319182	0.0341655	-0.575788	0.67092	1581_s_at	topoisomerase (DNA) II beta 180kDa
CLTB	0.00105506	0.0195941	-0.578044	0.669872	32523_at	clathrin, light chain B
RAN	0.00404263	0.0363477	-0.578398	0.669707	1839_at	RAN, member RAS oncogene family
TPPP	0.00306669	0.0334037	-0.583988	0.667117	37465_at	tubulin polymerization promoting protein
TIMM17A	6.83093e-05	0.00448883	-0.589729	0.664468	32829_at	translocase of inner mitochondrial membrane 17 homolog A (yeast)
NRXN1	0.00533639	0.045357	-0.591329	0.663731	39240_at	neurexin 1
RBBP4	0.00102951	0.0196098	-0.591505	0.66365	1318_at	retinoblastoma binding protein 4
PRKCZ	0.00161277	0.0245506	-0.59451	0.66227	362_at	protein kinase C, zeta
AZIN1	0.000760836	0.0158763	-0.606803	0.65665	33367_s_at	antizyme inhibitor 1
MAPK9	0.00210752	0.0267768	-0.615782	0.652576	1238_at	mitogen-activated protein kinase 9
TGOLN2	0.00372689	0.0369143	-0.623205	0.649227	31827_s_at	trans-golgi network protein 2
PDE4D	0.000278283	0.00931199	-0.62678	0.64762	38526_at	phosphodiesterase 4D, cAMP-specific
CACNB2	4.95627e-06	0.00204546	-0.628089	0.647033	39647_s_at	calcium channel, voltage-dependent, beta 2 subunit
DLGAP1	0.00214665	0.0287846	-0.633301	0.6447	40388_at	discs, large (Drosophila) homolog-associated protein 1
PVRL3	0.000747904	0.015874	-0.637212	0.642954	34202_at	poliovirus receptor-related 3
DYNC1I1	0.00175875	0.0255177	-0.639804	0.6418	40319_at	dynein, cytoplasmic 1, intermediate chain 1
PITPNB	6.72173e-05	0.00520138	-0.649397	0.637547	353_at	phosphatidylinositol transfer protein, beta
DNAJB4	0.00137207	0.0221578	-0.649588	0.637463	158_at	DnaJ (Hsp40) homolog, subfamily B, member 4
ACTA1	8.7489e-07	0.00108321	-0.657608	0.633928	31737_at	actin, alpha 1, skeletal muscle
RAB5A	0.00224702	0.0291823	-0.672972	0.627213	600_at	RAB5A, member RAS oncogene family
GNB5	0.000208714	0.00824712	-0.677141	0.625403	38176_at	guanine nucleotide binding protein (G protein), beta 5
SMARCA2	6.60959e-05	0.00533697	-0.679806	0.624249	40962_s_at	SWI/SNF related, matrix associated, actin dependent regulator of chromatin, subfamily a, member 2
INPP4A	9.20729e-05	0.0056998	-0.683297	0.622741	35924_at	inositol polyphosphate-4-phosphatase, type I, 107kDa
SCAMP5	0.00481919	0.0430288	-0.684989	0.622011	37546_r_at	secretory carrier membrane protein 5
TSPYL2	0.00454024	0.0415367	-0.685964	0.62159	40165_at	TSPY-like 2
CAMK2A	0.00304065	0.0332175	-0.693331	0.618424	31813_at	calcium/calmodulin-dependent protein kinase II alpha
CALB1	0.000706987	0.0158191	-0.698186	0.616346	36570_at	calbindin 1, 28kDa
PLEKHB2	0.00102193	0.0196671	-0.701005	0.615144	39525_at	pleckstrin homology domain containing, family B (evectins) member 2
NUTF2	0.000108398	0.00610034	-0.701743	0.614829	31858_at	nuclear transport factor 2
C5orf30	0.000254655	0.00900828	-0.703275	0.614177	33466_at	chromosome 5 open reading frame 30
CUX2	0.00296472	0.0328713	-0.705621	0.613178	37812_at	cut-like homeobox 2
HTR2A	0.0084752	0.049011	-0.711074	0.610865	35469_at	5-hydroxytryptamine (serotonin) receptor 2A
PAK3	0.00267397	0.0313311	-0.712977	0.61006	33074_g_at	p21 protein (Cdc42/Rac)-activated kinase 3
ANK2	0.000622719	0.0147323	-0.718494	0.607732	39850_at	ankyrin 2, neuronal
MAN1A1	0.00234988	0.029891	-0.723092	0.605798	39613_at	mannosidase, alpha, class 1A, member 1
CAP2	0.00818165	0.0451738	-0.751968	0.593793	693_g_at	CAP, adenylate cyclase-associated protein, 2 (yeast)
GNAQ	0.000359938	0.0108693	-0.754566	0.592725	38580_at	guanine nucleotide binding protein (G protein), q polypeptide
NAPG	0.000153806	0.00714106	-0.761177	0.590015	40289_at	N-ethylmaleimide-sensitive factor attachment protein, gamma
LOC647979	0.000238395	0.00876708	-0.761788	0.589765	35603_at	hypothetical LOC647979
TAGLN3	0.00529246	0.0450869	-0.780407	0.582202	32652_g_at	transgelin 3
HSP90AB1	0.00104523	0.0196077	-0.809161	0.570714	33986_r_at	heat shock protein 90kDa alpha (cytosolic), class B member 1
MEGF8	0.000115184	0.00629162	-0.809208	0.570695	35394_at	multiple EGF-like-domains 8
CDK17	0.00310282	0.033383	-0.810194	0.570305	1222_at	cyclin-dependent kinase 17
KIF1B	0.000172371	0.00753223	-0.824181	0.564803	34924_at	kinesin family member 1B
DDX3X	0.000211525	0.00827021	-0.825195	0.564406	826_at	DEAD (Asp-Glu-Ala-Asp) box polypeptide 3, X-linked
MAPT	0.000347356	0.010582	-0.828125	0.563261	113_i_at	microtubule-associated protein tau
CALM1	0.00219341	0.0289929	-0.831838	0.561813	41287_s_at	calmodulin 1 (phosphorylase kinase, delta)
MRPS12	3.26163e-06	0.00242295	-0.833186	0.561288	33214_at	mitochondrial ribosomal protein S12
FGF12	6.25831e-05	0.00540589	-0.846144	0.556269	41673_at	fibroblast growth factor 12
ITPKA	5.21197e-05	0.00509445	-0.850905	0.554437	118_at	inositol 1,4,5-trisphosphate 3-kinase A
CRH	0.00170844	0.0253828	-0.86641	0.54851	40382_at	corticotropin releasing hormone
FRMPD4	8.63182e-05	0.00562479	-0.889778	0.539697	35030_i_at	FERM and PDZ domain containing 4
GRIN2A	4.57693e-06	0.00242859	-0.900695	0.535629	38236_at	glutamate receptor, ionotropic, N-methyl D-aspartate 2A
CNTN1	0.000335995	0.0103999	-0.932737	0.523864	31809_at	contactin 1
VDAC1P1	3.95096e-06	0.00244585	-0.937394	0.522175	31608_g_at	voltage-dependent anion channel 1 pseudogene 1///voltage-dependent anion channel 1
BCL11A	1.05701e-05	0.0024538	-0.945066	0.519406	41356_at	B-cell CLL/lymphoma 11A (zinc finger protein)
ATP5A1	0.00274676	0.0315862	-0.946218	0.518991	40096_at	ATP synthase, H+ transporting, mitochondrial F1 complex, alpha subunit 1, cardiac muscle
MEF2C	9.23499e-06	0.00245012	-0.948197	0.51828	37712_g_at	myocyte enhancer factor 2C
NR1D2	0.000241724	0.00880234	-0.99807	0.500669	35705_at	nuclear receptor subfamily 1, group D, member 2
ATP2B2	6.99275e-05	0.00557508	-1.00775	0.497321	37053_at	ATPase, Ca++ transporting, plasma membrane 2
MAP2	0.000321349	0.00748866	-1.01267	0.495627	183_at	microtubule-associated protein 2
SYN2	3.08272e-05	0.00424081	-1.04519	0.484579	36748_at	synapsin II
KLHDC3	4.48562e-05	0.00504879	-1.08427	0.47163	39537_at	kelch domain containing 3
FKBP1A	1.62748e-05	0.00318157	-1.08851	0.470247	953_g_at	FK506 binding protein 1A, 12kDa
SST	0.000151805	0.00713738	-1.10261	0.465674	37782_at	somatostatin
GABRB3	3.19459e-07	0.00118657	-1.10424	0.465146	31817_at	gamma-aminobutyric acid (GABA) A receptor, beta 3
WDR92	0.000128779	0.00683321	-1.11336	0.462216	40513_at	WD repeat domain 92///protein phosphatase 3, regulatory subunit B, alpha
PRKCB	0.00508601	0.0379278	-1.11601	0.461367	1217_g_at	protein kinase C, beta
RAB6A	0.000104323	0.00605451	-1.15041	0.450496	622_at	RAB6A, member RAS oncogene family
PCMT1	0.000139605	0.00682286	-1.18913	0.438568	37738_g_at	protein-L-isoaspartate (D-aspartate) O-methyltransferase
ABI2	4.9873e-05	0.0050066	-1.1962	0.436423	36448_at	abl-interactor 2
KCNAB1	0.00198636	0.0273258	-1.19657	0.43631	32711_g_at	potassium voltage-gated channel, shaker-related subfamily, beta member 1
MAP1B	2.10833e-05	0.00355954	-1.23808	0.423935	39531_at	microtubule-associated protein 1B
YWHAZ	0.000104186	0.00614253	-1.30208	0.405542	34642_at	tyrosine 3-monooxygenase/tryptophan 5-monooxygenase activation protein, zeta polypeptide
RAP2A	0.000333474	0.0104086	-1.32505	0.399135	41317_at	RAP2A, member of RAS oncogene family
PAK1	2.05329e-05	0.00363169	-1.36292	0.388794	1558_g_at	p21 protein (Cdc42/Rac)-activated kinase 1
CALM3	6.15958e-05	0.00558015	-1.49915	0.353761	41144_g_at	calmodulin 3 (phosphorylase kinase, delta)///calmodulin 2 (phosphorylase kinase, delta)///calmodulin 1 (phosphorylase kinase, delta)
ZNF238	0.000137568	0.00681295	-1.51221	0.350574	35825_s_at	zinc finger protein 238

## Sheet: DEGs_1.5F.C
List of DEGs in nervous tissue with gene expression-fold change >=1.5 fold
(Extracted from Student’s t-test that was subjected to statistical enrichment analysis using StRAnGER algorithm with a hypergeometric p-value=0.05)
Gene_ID	p-value	FDR	Fold Change (log2) old vs young	Fold Change (natural) old vs young	Affy_set_ID	Gene title
ABI2	4.9873e-05	0.0050066	-1.1962	0.436423	36448_at	abl-interactor 2
CALB1	0.000706987	0.0158191	-0.698186	0.616346	36570_at	calbindin 1, 28kDa
CALM1	0.00219341	0.0289929	-0.831838	0.561813	41287_s_at	calmodulin 1 (phosphorylase kinase, delta)
CALM3	6.15958e-05	0.00558015	-1.49915	0.353761	41144_g_at	calmodulin 3 (phosphorylase kinase, delta)///calmodulin 2 (phosphorylase kinase, delta)///calmodulin 1 (phosphorylase kinase, delta)
CAMK2A	0.00304065	0.0332175	-0.693331	0.618424	31813_at	calcium/calmodulin-dependent protein kinase II alpha
CAP2	0.00818165	0.0451738	-0.751968	0.593793	693_g_at	CAP, adenylate cyclase-associated protein, 2 (yeast)
CDK17	0.00310282	0.033383	-0.810194	0.570305	1222_at	cyclin-dependent kinase 17
CEBPD	0.00263155	0.0314289	0.623162	1.54025	1052_s_at	CCAAT/enhancer binding protein (C/EBP), delta
CFHR1	0.00571603	0.0472854	0.861186	1.81653	32249_at	complement factor H-related 1///complement factor H
CLIC4	0.000708384	0.0157554	0.798569	1.73938	33891_at	chloride intracellular channel 4
CNTN1	0.000335995	0.0103999	-0.932737	0.523864	31809_at	contactin 1
CRH	0.00170844	0.0253828	-0.86641	0.54851	40382_at	corticotropin releasing hormone
CRYAB	0.00211938	0.0238509	0.685433	1.60818	32242_at	crystallin, alpha B
CUX2	0.00296472	0.0328713	-0.705621	0.613178	37812_at	cut-like homeobox 2
DDIT4	0.00129796	0.021332	0.912218	1.88194	39827_at	DNA-damage-inducible transcript 4
DDX3X	0.000211525	0.00827021	-0.825195	0.564406	826_at	DEAD (Asp-Glu-Ala-Asp) box polypeptide 3, X-linked
DLGAP1	0.00214665	0.0287846	-0.633301	0.6447	40388_at	discs, large (Drosophila) homolog-associated protein 1
DNAJB4	0.00137207	0.0221578	-0.649588	0.637463	158_at	DnaJ (Hsp40) homolog, subfamily B, member 4
DPYSL3	7.82477e-05	0.00558917	0.590194	1.50545	36149_at	dihydropyrimidinase-like 3
DYNC1I1	0.00175875	0.0255177	-0.639804	0.6418	40319_at	dynein, cytoplasmic 1, intermediate chain 1
EFEMP1	0.00167765	0.025228	0.930865	1.90642	32551_at	EGF-containing fibulin-like extracellular matrix protein 1
ERBB3	0.000747339	0.0159532	0.583372	1.49835	1585_at	v-erb-b2 erythroblastic leukemia viral oncogene homolog 3 (avian)
FGF1	6.42146e-05	0.00542075	0.84278	1.7935	996_at	fibroblast growth factor 1 (acidic)
FGF12	6.25831e-05	0.00540589	-0.846144	0.556269	41673_at	fibroblast growth factor 12
FGFR3	0.000384415	0.0114227	0.632415	1.55016	31805_at	fibroblast growth factor receptor 3
FKBP1A	1.62748e-05	0.00318157	-1.08851	0.470247	953_g_at	FK506 binding protein 1A, 12kDa
FRMPD4	8.63182e-05	0.00562479	-0.889778	0.539697	35030_i_at	FERM and PDZ domain containing 4
GAB2	0.00372823	0.0368293	0.604383	1.52033	35253_at	GRB2-associated binding protein 2
GABRB3	3.19459e-07	0.00118657	-1.10424	0.465146	31817_at	gamma-aminobutyric acid (GABA) A receptor, beta 3
GJA1	0.00318095	0.0341475	0.605087	1.52107	32531_at	gap junction protein, alpha 1, 43kDa
GNAQ	0.000359938	0.0108693	-0.754566	0.592725	38580_at	guanine nucleotide binding protein (G protein), q polypeptide
GNB5	0.000208714	0.00824712	-0.677141	0.625403	38176_at	guanine nucleotide binding protein (G protein), beta 5
GNG12	0.00144733	0.0228758	0.66052	1.58065	38079_at	guanine nucleotide binding protein (G protein), gamma 12
GRIN2A	4.57693e-06	0.00242859	-0.900695	0.535629	38236_at	glutamate receptor, ionotropic, N-methyl D-aspartate 2A
HBA2	5.73488e-05	0.00546183	1.20928	2.31222	31525_s_at	hemoglobin, alpha 2///hemoglobin, alpha 1
HBB	3.57696e-05	0.00471418	1.22971	2.3452	31687_f_at	hemoglobin, beta
HEBP2	0.00115055	0.0200634	0.705517	1.63073	41454_at	heme binding protein 2
HLA-DPA1	0.00543199	0.0458548	0.661616	1.58185	38833_at	major histocompatibility complex, class II, DP alpha 1
HSP90AB1	0.00104523	0.0196077	-0.809161	0.570714	33986_r_at	heat shock protein 90kDa alpha (cytosolic), class B member 1
HSPA2	0.00477337	0.039907	0.791771	1.7312	36925_at	heat shock 70kDa protein 2
HTR2A	0.0084752	0.049011	-0.711074	0.610865	35469_at	5-hydroxytryptamine (serotonin) receptor 2A
ID4	0.00405848	0.0391545	0.785005	1.7231	41536_at	inhibitor of DNA binding 4, dominant negative helix-loop-helix protein
INPP4A	9.20729e-05	0.0056998	-0.683297	0.622741	35924_at	inositol polyphosphate-4-phosphatase, type I, 107kDa
ITPKA	5.21197e-05	0.00509445	-0.850905	0.554437	118_at	inositol 1,4,5-trisphosphate 3-kinase A
ITPKB	0.000100657	0.00603019	0.739727	1.66986	37272_at	inositol 1,4,5-trisphosphate 3-kinase B
KANK1	9.8108e-05	0.00597383	0.647671	1.56664	37225_at	KN motif and ankyrin repeat domains 1
KCNAB1	0.00198636	0.0273258	-1.19657	0.43631	32711_g_at	potassium voltage-gated channel, shaker-related subfamily, beta member 1
KIF1B	0.000172371	0.00753223	-0.824181	0.564803	34924_at	kinesin family member 1B
KLHDC3	4.48562e-05	0.00504879	-1.08427	0.47163	39537_at	kelch domain containing 3
LAMP2	7.26127e-05	0.0053884	0.864183	1.82031	38402_at	lysosomal-associated membrane protein 2
LOC647979	0.000238395	0.00876708	-0.761788	0.589765	35603_at	hypothetical LOC647979
LRIG1	8.4568e-05	0.00560914	0.726526	1.65465	34800_at	leucine-rich repeats and immunoglobulin-like domains 1
LRP4	0.00194948	0.0270186	0.642435	1.56096	36059_at	low density lipoprotein receptor-related protein 4
MAN1A1	0.00234988	0.029891	-0.723092	0.605798	39613_at	mannosidase, alpha, class 1A, member 1
MAP1B	2.10833e-05	0.00355954	-1.23808	0.423935	39531_at	microtubule-associated protein 1B
MAP2	0.000321349	0.00748866	-1.01267	0.495627	183_at	microtubule-associated protein 2
MAPK9	0.00210752	0.0267768	-0.615782	0.652576	1238_at	mitogen-activated protein kinase 9
MAPT	0.000347356	0.010582	-0.828125	0.563261	113_i_at	microtubule-associated protein tau
MEF2C	9.23499e-06	0.00245012	-0.948197	0.51828	37712_g_at	myocyte enhancer factor 2C
MEGF8	0.000115184	0.00629162	-0.809208	0.570695	35394_at	multiple EGF-like-domains 8
METTL7A	0.00046062	0.0124882	0.649545	1.56867	38717_at	methyltransferase like 7A
MRPS12	3.26163e-06	0.00242295	-0.833186	0.561288	33214_at	mitochondrial ribosomal protein S12
MT1G	0.00296124	0.032931	0.791424	1.73078	926_at	metallothionein 1G
MYO10	0.000189644	0.00782662	0.804546	1.7466	35362_at	myosin X
NAPG	0.000153806	0.00714106	-0.761177	0.590015	40289_at	N-ethylmaleimide-sensitive factor attachment protein, gamma
NEK7	0.000822523	0.0167863	0.636828	1.55491	34752_at	NIMA (never in mitosis gene a)-related kinase 7
NPC2	0.00307551	0.0334018	0.602022	1.51784	39345_at	Niemann-Pick disease, type C2
NR1D2	0.000241724	0.00880234	-0.99807	0.500669	35705_at	nuclear receptor subfamily 1, group D, member 2
NRXN1	0.00533639	0.045357	-0.591329	0.663731	39240_at	neurexin 1
NUTF2	0.000108398	0.00610034	-0.701743	0.614829	31858_at	nuclear transport factor 2
PAK1	2.05329e-05	0.00363169	-1.36292	0.388794	1558_g_at	p21 protein (Cdc42/Rac)-activated kinase 1
PAK3	0.00267397	0.0313311	-0.712977	0.61006	33074_g_at	p21 protein (Cdc42/Rac)-activated kinase 3
PALLD	0.000457682	0.0126864	0.688077	1.61113	41191_at	palladin, cytoskeletal associated protein
PCMT1	0.000139605	0.00682286	-1.18913	0.438568	37738_g_at	protein-L-isoaspartate (D-aspartate) O-methyltransferase
PDE4D	0.000278283	0.00931199	-0.62678	0.64762	38526_at	phosphodiesterase 4D, cAMP-specific
PDE4DIP	7.71735e-05	0.00573293	0.821173	1.76684	36092_at	phosphodiesterase 4D interacting protein
PDLIM5	0.000977883	0.0168039	0.69795	1.6222	37366_at	PDZ and LIM domain 5
PIK3C2A	0.000120262	0.00647376	0.582522	1.49746	36509_at	phosphoinositide-3-kinase, class 2, alpha polypeptide
PIP4K2A	0.000700866	0.0157772	0.696632	1.62072	35310_at	phosphatidylinositol-5-phosphate 4-kinase, type II, alpha
PITPNB	6.72173e-05	0.00520138	-0.649397	0.637547	353_at	phosphatidylinositol transfer protein, beta
PLEKHB2	0.00102193	0.0196671	-0.701005	0.615144	39525_at	pleckstrin homology domain containing, family B (evectins) member 2
PLOD2	0.00102725	0.0196677	0.869715	1.8273	34795_at	procollagen-lysine, 2-oxoglutarate 5-dioxygenase 2
PRKCB	0.00508601	0.0379278	-1.11601	0.461367	1217_g_at	protein kinase C, beta
PRKCZ	0.00161277	0.0245506	-0.59451	0.66227	362_at	protein kinase C, zeta
PVRL3	0.000747904	0.015874	-0.637212	0.642954	34202_at	poliovirus receptor-related 3
RAB5A	0.00224702	0.0291823	-0.672972	0.627213	600_at	RAB5A, member RAS oncogene family
RAB6A	0.000104323	0.00605451	-1.15041	0.450496	622_at	RAB6A, member RAS oncogene family
RAMP1	8.83447e-05	0.00565759	0.618733	1.53553	35668_at	receptor (G protein-coupled) activity modifying protein 1
RAP2A	0.000333474	0.0104086	-1.32505	0.399135	41317_at	RAP2A, member of RAS oncogene family
RASSF2	4.32956e-05	0.00502542	0.687416	1.6104	37598_at	Ras association (RalGDS/AF-6) domain family member 2
RBBP4	0.00102951	0.0196098	-0.591505	0.66365	1318_at	retinoblastoma binding protein 4
RDX	1.91827e-06	0.00178126	0.64221	1.56072	34887_at	radixin
RGS20	0.00517044	0.044662	0.768938	1.70402	41086_at	regulator of G-protein signaling 20
RHOBTB3	0.00308889	0.0258272	0.918569	1.89024	32215_i_at	Rho-related BTB domain containing 3
RIN2	4.32047e-05	0.00517664	0.614963	1.53152	36550_at	Ras and Rab interactor 2
S1PR1	0.00538449	0.0456614	0.876704	1.83618	587_at	sphingosine-1-phosphate receptor 1
SCAMP5	0.00481919	0.0430288	-0.684989	0.622011	37546_r_at	secretory carrier membrane protein 5
SEPP1	0.000424944	0.0119574	0.632364	1.5501	34363_at	selenoprotein P, plasma, 1
SEPT10	0.00268407	0.0311546	0.657963	1.57785	38033_at	septin 10
SERINC5	0.000228765	0.00858288	0.80406	1.74601	34840_at	serine incorporator 5
SMARCA2	6.60959e-05	0.00533697	-0.679806	0.624249	40962_s_at	SWI/SNF related, matrix associated, actin dependent regulator of chromatin, subfamily a, member 2
SPON1	6.14345e-05	0.00570468	0.743956	1.67476	35277_at	spondin 1, extracellular matrix protein
SST	0.000151805	0.00713738	-1.10261	0.465674	37782_at	somatostatin
SYN2	3.08272e-05	0.00424081	-1.04519	0.484579	36748_at	synapsin II
TAGLN3	0.00529246	0.0450869	-0.780407	0.582202	32652_g_at	transgelin 3
TAX1BP3	0.000535377	0.0134362	0.653897	1.57341	39416_at	Tax1 (human T-cell leukemia virus type I) binding protein 3
TGOLN2	0.00372689	0.0369143	-0.623205	0.649227	31827_s_at	trans-golgi network protein 2
TIMM17A	6.83093e-05	0.00448883	-0.589729	0.664468	32829_at	translocase of inner mitochondrial membrane 17 homolog A (yeast)
TMEM123	1.25538e-05	0.00274288	0.642576	1.56111	40803_at	transmembrane protein 123
TPPP	0.00306669	0.0334037	-0.583988	0.667117	37465_at	tubulin polymerization promoting protein
TSPYL2	0.00454024	0.0415367	-0.685964	0.62159	40165_at	TSPY-like 2
TXNIP	0.00113136	0.0199157	0.765783	1.70029	31508_at	thioredoxin interacting protein
VCAN	0.000511926	0.0130669	0.695197	1.61911	38111_at	versican
VDAC1P1	3.95096e-06	0.00244585	-0.937394	0.522175	31608_g_at	voltage-dependent anion channel 1 pseudogene 1///voltage-dependent anion channel 1
VIM	0.00117988	0.0203835	0.633233	1.55104	34091_s_at	vimentin
VWF	0.00300316	0.0331985	0.703575	1.62854	607_s_at	von Willebrand factor
WDR92	0.000128779	0.00683321	-1.11336	0.462216	40513_at	WD repeat domain 92///protein phosphatase 3, regulatory subunit B, alpha
WNK1	2.70904e-05	0.00437488	0.651698	1.57102	32185_at	WNK lysine deficient protein kinase 1
WWTR1	0.000166018	0.00742942	0.898923	1.86467	33876_at	WW domain containing transcription regulator 1
YWHAZ	0.000104186	0.00614253	-1.30208	0.405542	34642_at	tyrosine 3-monooxygenase/tryptophan 5-monooxygenase activation protein, zeta polypeptide
ZCCHC24	4.85638e-05	0.00501059	0.708956	1.63462	34303_at	zinc finger, CCHC domain containing 24
ZEB2	0.00267103	0.0313958	0.663024	1.5834	35681_r_at	zinc finger E-box binding homeobox 2
ZHX2	0.000154902	0.00710317	0.725141	1.65306	41503_at	zinc fingers and homeoboxes 2
ZNF238	0.000137568	0.00681295	-1.51221	0.350574	35825_s_at	zinc finger protein 238

## Sheet: Stranger_output
Functional analysis of DEGs in nervous tissue with "Stranger" based on GO terms
GO Term/Gene Name	GO Annotation/Gene Description	GO Category/GeneID	OT p-value/Gene p-value	Enrichment	Corrected p-value	Gene_ID	p-value	FDR	Fold Change (log2) old vs young	Fold Change (natural) old vs young	Affy_set_ID	up_down_old_vs_young
GO:0005886	plasma membrane	C	8.975e-10	45/1406	6.3543e-07
SCAMP5	secretory carrier membrane protein 5	SCAMP5	0.0048192			SCAMP5	0.0048192	0.04303	-0.684989	0.622011	37546_r_at	down
CALM3	calmodulin 3 (phosphorylase kinase, delta)	CALM3	6.16e-05			CALM3	6.16e-05	0.00558	-1.49915	0.353761	41144_g_at	down
PVRL3	poliovirus receptor-related 3	PVRL3	0.0007479			PVRL3	0.0007479	0.01587	-0.637212	0.642954	34202_at	down
GABRB3	gamma-aminobutyric acid (GABA) A receptor, beta 3	GABRB3	3e-07			GABRB3	3e-07	0.00119	-1.10424	0.465146	31817_at	down
GNB5	guanine nucleotide binding protein (G protein), beta 5	GNB5	0.0002087			GNB5	0.0002087	0.00825	-0.677141	0.625403	38176_at	down
RAP2A	RAP2A, member of RAS oncogene family	RAP2A	0.0003335			RAP2A	0.0003335	0.01041	-1.32505	0.399135	41317_at	down
CRYAB	crystallin, alpha B	CRYAB	0.0021194			CRYAB	0.0021194	0.0238509	0.685433	1.60818	32242_at	up
F3	coagulation factor III (thromboplastin, tissue factor)	F3	0.0078725			F3	0.0078725	0.05645	0.705182	1.63035	36543_at	up
CNTN1	contactin 1	CNTN1	0.000336			CNTN1	0.000336	0.0104	-0.932737	0.523864	31809_at	down
HTR2A	5-hydroxytryptamine (serotonin) receptor 2A	HTR2A	0.0084752			HTR2A	0.0084752	0.049011	-0.711074	0.610865	35469_at	down
GNAQ	guanine nucleotide binding protein (G protein), q polypeptide	GNAQ	0.0003599			GNAQ	0.0003599	0.01087	-0.754566	0.592725	38580_at	down
CAMK2A	calcium/calmodulin-dependent protein kinase II alpha	CAMK2A	0.0030407			CAMK2A	0.0030407	0.03322	-0.693331	0.618424	31813_at	down
CAP2	CAP, adenylate cyclase-associated protein, 2 (yeast)	CAP2	0.0081816			CAP2	0.0081816	0.0451738	-0.751968	0.593793	693_g_at	down
PAK1	p21 protein (Cdc42/Rac)-activated kinase 1	PAK1	2.05e-05			PAK1	2.05e-05	0.00363	-1.36292	0.388794	1558_g_at	down
RDX	radixin	RDX	1.9e-06			RDX	1.9e-06	0.00178	0.64221	1.56072	34887_at	up
ENPP2	ectonucleotide pyrophosphatase/phosphodiesterase 2	ENPP2	0.0072419			ENPP2	0.0072419	0.0536232	0.680149	1.60231	41123_s_at	up
RAMP1	receptor (G protein-coupled) activity modifying protein 1	RAMP1	8.83e-05			RAMP1	8.83e-05	0.00566	0.618733	1.53553	35668_at	up
IFITM1	interferon induced transmembrane protein 1 (9-27)	IFITM1	0.017489			IFITM1	0.017489	0.0879	0.796211	1.73653	675_at	up
ATP5A1	ATP synthase, H+ transporting, mitochondrial F1 complex, alpha subunit 1, cardiac muscle	ATP5A1	0.0027468			ATP5A1	0.0027468	0.03159	-0.946218	0.518991	40096_at	down
GRIN2A	glutamate receptor, ionotropic, N-methyl D-aspartate 2A	GRIN2A	4.6e-06			GRIN2A	4.6e-06	0.00243	-0.900695	0.535629	38236_at	down
HLA-DPA1	major histocompatibility complex, class II, DP alpha 1	HLA-DPA1	0.005432			HLA-DPA1	0.005432	0.04585	0.661616	1.58185	38833_at	up
ATP2B2	ATPase, Ca++ transporting, plasma membrane 2	ATP2B2	6.99e-05			ATP2B2	6.99e-05	0.00557508	-1.00775	0.497321	37053_at	down
PRKCZ	protein kinase C, zeta	PRKCZ	0.0016128			PRKCZ	0.0016128	0.02455	-0.59451	0.66227	362_at	down
ANK2	ankyrin 2, neuronal	ANK2	0.0006227			ANK2	0.0006227	0.01473	-0.718494	0.607732	39850_at	down
LAMP2	lysosomal-associated membrane protein 2	LAMP2	7.26e-05			LAMP2	7.26e-05	0.0053884	0.864183	1.82031	38402_at	up
DDX3X	DEAD (Asp-Glu-Ala-Asp) box polypeptide 3, X-linked	DDX3X	0.0002115			DDX3X	0.0002115	0.00827	-0.825195	0.564406	826_at	down
GJA1	gap junction protein, alpha 1, 43kDa	GJA1	0.003181			GJA1	0.003181	0.03415	0.605087	1.52107	32531_at	up
DLGAP1	discs, large (Drosophila) homolog-associated protein 1	DLGAP1	0.0021466			DLGAP1	0.0021466	0.02878	-0.633301	0.6447	40388_at	down
TGOLN2	trans-golgi network protein 2	TGOLN2	0.0037269			TGOLN2	0.0037269	0.03691	-0.623205	0.649227	31827_s_at	down
FGFR3	fibroblast growth factor receptor 3	FGFR3	0.0003844			FGFR3	0.0003844	0.01142	0.632415	1.55016	31805_at	up
GNG12	guanine nucleotide binding protein (G protein), gamma 12	GNG12	0.0014473			GNG12	0.0014473	0.02288	0.66052	1.58065	38079_at	up
ACTL6A	actin-like 6A	ACTL6A	0.0046062			ACTL6A	0.0046062	0.04183	0.649623	1.56876	41278_at	up
PRKCB	protein kinase C, beta	PRKCB	0.005086			PRKCB	0.005086	0.0379278	-1.11601	0.461367	1217_g_at	down
RAB5A	RAB5A, member RAS oncogene family	RAB5A	0.002247			RAB5A	0.002247	0.02918	-0.672972	0.627213	600_at	down
CD99	CD99 molecule	CD99	0.0068295			CD99	0.0068295	0.05274	0.679723	1.60183	41138_at	up
GPR125	G protein-coupled receptor 125	GPR125	0.0133737			GPR125	0.0133737	0.07619	0.775101	1.71131	33299_at	up
CLIC4	chloride intracellular channel 4	CLIC4	0.0007084			CLIC4	0.0007084	0.01576	0.798569	1.73938	33891_at	up
MAPT	microtubule-associated protein tau	MAPT	0.0003474			MAPT	0.0003474	0.010582	-0.828125	0.563261	113_i_at	down
DPYSL3	dihydropyrimidinase-like 3	DPYSL3	7.82e-05			DPYSL3	7.82e-05	0.00559	0.590194	1.50545	36149_at	up
CACNB2	calcium channel, voltage-dependent, beta 2 subunit	CACNB2	5e-06			CACNB2	5e-06	0.00205	-0.628089	0.647033	39647_s_at	down
GNG11	guanine nucleotide binding protein (G protein), gamma 11	GNG11	0.0217966			GNG11	0.0217966	0.09946	0.642485	1.56102	37908_at	up
VWF	von Willebrand factor	VWF	0.0030032			VWF	0.0030032	0.0332	0.703575	1.62854	607_s_at	up
S1PR1	sphingosine-1-phosphate receptor 1	S1PR1	0.0053845			S1PR1	0.0053845	0.04566	0.876704	1.83618	587_at	up
PIK3C2A	phosphoinositide-3-kinase, class 2, alpha polypeptide	PIK3C2A	0.0001203			PIK3C2A	0.0001203	0.00647	0.582522	1.49746	36509_at	up
ERBB3	v-erb-b2 erythroblastic leukemia viral oncogene homolog 3 (avian)	ERBB3	0.0007473			ERBB3	0.0007473	0.01595	0.583372	1.49835	1585_at	up
GO:0005515	protein binding	F	2.30637e-08	73/3260	1.63291e-05
SCAMP5	secretory carrier membrane protein 5	SCAMP5	0.0048192			SCAMP5	0.0048192	0.04303	-0.684989	0.622011	37546_r_at	down
MT1G	metallothionein 1G	MT1G	0.0029612			MT1G	0.0029612	0.03293	0.791424	1.73078	926_at	up
RIN2	Ras and Rab interactor 2	RIN2	4.32e-05			RIN2	4.32e-05	0.00518	0.614963	1.53152	36550_at	up
GNB5	guanine nucleotide binding protein (G protein), beta 5	GNB5	0.0002087			GNB5	0.0002087	0.00825	-0.677141	0.625403	38176_at	down
RAP2A	RAP2A, member of RAS oncogene family	RAP2A	0.0003335			RAP2A	0.0003335	0.01041	-1.32505	0.399135	41317_at	down
ZHX2	zinc fingers and homeoboxes 2	ZHX2	0.0001549			ZHX2	0.0001549	0.0071	0.725141	1.65306	41503_at	up
AZIN1	antizyme inhibitor 1	AZIN1	0.0007608			AZIN1	0.0007608	0.01588	-0.606803	0.65665	33367_s_at	down
CHGB	chromogranin B (secretogranin 1)	CHGB	0.0109242			CHGB	0.0109242	0.06785	-0.646021	0.63904	33426_at	down
CNTN1	contactin 1	CNTN1	0.000336			CNTN1	0.000336	0.0104	-0.932737	0.523864	31809_at	down
MAP1B	microtubule-associated protein 1B	MAP1B	2.11e-05			MAP1B	2.11e-05	0.00356	-1.23808	0.423935	39531_at	down
GNAQ	guanine nucleotide binding protein (G protein), q polypeptide	GNAQ	0.0003599			GNAQ	0.0003599	0.01087	-0.754566	0.592725	38580_at	down
SRGN	serglycin	SRGN	0.0110681			SRGN	0.0110681	0.0684	0.863611	1.81959	32227_at	up
LRIG1	leucine-rich repeats and immunoglobulin-like domains 1	LRIG1	8.46e-05			LRIG1	8.46e-05	0.00561	0.726526	1.65465	34800_at	up
NUTF2	nuclear transport factor 2	NUTF2	0.0001084			NUTF2	0.0001084	0.0061	-0.701743	0.614829	31858_at	down
FGF2	fibroblast growth factor 2 (basic)	FGF2	0.0094126			FGF2	0.0094126	0.06199	0.609138	1.52535	1593_at	up
TUBA4A	tubulin, alpha 4a	TUBA4A	0.0186178			TUBA4A	0.0186178	0.09147	-0.653153	0.635889	330_s_at	down
CLTB	clathrin, light chain (Lcb)	CLTB	0.0010551			CLTB	0.0010551	0.01959	-0.578044	0.669872	32523_at	down
TSPYL2	TSPY-like 2	TSPYL2	0.0045402			TSPYL2	0.0045402	0.04154	-0.685964	0.62159	40165_at	down
PLEKHB2	pleckstrin homology domain containing, family B (evectins) member 2	PLEKHB2	0.0010219			PLEKHB2	0.0010219	0.01967	-0.701005	0.615144	39525_at	down
APOD	apolipoprotein D	APOD	1.79e-05			APOD	1.79e-05	0.00332	0.763591	1.69771	36681_at	up
WNK1	WNK lysine deficient protein kinase 1	WNK1	2.71e-05			WNK1	2.71e-05	0.00437	0.651698	1.57102	32185_at	up
RASSF2	Ras association (RalGDS/AF-6) domain family member 2	RASSF2	4.33e-05			RASSF2	4.33e-05	0.00503	0.687416	1.6104	37598_at	up
FRMPD4	FERM and PDZ domain containing 4	FRMPD4	8.63e-05			FRMPD4	8.63e-05	0.00562	-0.889778	0.539697	35030_i_at	down
WWTR1	WW domain containing transcription regulator 1	WWTR1	0.000166			WWTR1	0.000166	0.00743	0.898923	1.86467	33876_at	up
IFITM1	interferon induced transmembrane protein 1 (9-27)	IFITM1	0.017489			IFITM1	0.017489	0.0879	0.796211	1.73653	675_at	up
ATP5A1	ATP synthase, H+ transporting, mitochondrial F1 complex, alpha subunit 1, cardiac muscle	ATP5A1	0.0027468			ATP5A1	0.0027468	0.03159	-0.946218	0.518991	40096_at	down
GRIN2A	glutamate receptor, ionotropic, N-methyl D-aspartate 2A	GRIN2A	4.6e-06			GRIN2A	4.6e-06	0.00243	-0.900695	0.535629	38236_at	down
RGS20	regulator of G-protein signaling 20	RGS20	0.0051704			RGS20	0.0051704	0.04466	0.768938	1.70402	41086_at	up
ANK2	ankyrin 2, neuronal	ANK2	0.0006227			ANK2	0.0006227	0.01473	-0.718494	0.607732	39850_at	down
SPON1	spondin 1, extracellular matrix protein	SPON1	6.14e-05			SPON1	6.14e-05	0.0057	0.743956	1.67476	35277_at	up
NRXN1	neurexin 1	NRXN1	0.0053364			NRXN1	0.0053364	0.04536	-0.591329	0.663731	39240_at	down
MRPS12	mitochondrial ribosomal protein S12	MRPS12	3.3e-06			MRPS12	3.3e-06	0.00242	-0.833186	0.561288	33214_at	down
CALB1	calbindin 1, 28kDa	CALB1	0.000707			CALB1	0.000707	0.01582	-0.698186	0.616346	36570_at	down
VIM	vimentin	VIM	0.0011799			VIM	0.0011799	0.02038	0.633233	1.55104	34091_s_at	up
DDX3X	DEAD (Asp-Glu-Ala-Asp) box polypeptide 3, X-linked	DDX3X	0.0002115			DDX3X	0.0002115	0.00827	-0.825195	0.564406	826_at	down
GJA1	gap junction protein, alpha 1, 43kDa	GJA1	0.003181			GJA1	0.003181	0.03415	0.605087	1.52107	32531_at	up
DLGAP1	discs, large (Drosophila) homolog-associated protein 1	DLGAP1	0.0021466			DLGAP1	0.0021466	0.02878	-0.633301	0.6447	40388_at	down
PLOD2	procollagen-lysine, 2-oxoglutarate 5-dioxygenase 2	PLOD2	0.0010273			PLOD2	0.0010273	0.01967	0.869715	1.8273	34795_at	up
TGOLN2	trans-golgi network protein 2	TGOLN2	0.0037269			TGOLN2	0.0037269	0.03691	-0.623205	0.649227	31827_s_at	down
RHOBTB3	Rho-related BTB domain containing 3	RHOBTB3	0.0030889			RHOBTB3	0.0030889	0.0258272	0.918569	1.89024	32215_i_at	up
ACTL6A	actin-like 6A	ACTL6A	0.0046062			ACTL6A	0.0046062	0.04183	0.649623	1.56876	41278_at	up
PRKCB	protein kinase C, beta	PRKCB	0.005086			PRKCB	0.005086	0.0379278	-1.11601	0.461367	1217_g_at	down
FGF1	fibroblast growth factor 1 (acidic)	FGF1	6.42e-05			FGF1	6.42e-05	0.00542	0.84278	1.7935	996_at	up
BCAS1	breast carcinoma amplified sequence 1	BCAS1	0.0140951			BCAS1	0.0140951	0.07849	0.639552	1.55785	37821_at	up
KIF1B	kinesin family member 1B	KIF1B	0.0001724			KIF1B	0.0001724	0.00753	-0.824181	0.564803	34924_at	down
RAB5A	RAB5A, member RAS oncogene family	RAB5A	0.002247			RAB5A	0.002247	0.02918	-0.672972	0.627213	600_at	down
PALLD	palladin, cytoskeletal associated protein	PALLD	0.0004577			PALLD	0.0004577	0.01269	0.688077	1.61113	41191_at	up
CD99	CD99 molecule	CD99	0.0068295			CD99	0.0068295	0.05274	0.679723	1.60183	41138_at	up
GPR125	G protein-coupled receptor 125	GPR125	0.0133737			GPR125	0.0133737	0.07619	0.775101	1.71131	33299_at	up
SPP1	secreted phosphoprotein 1	SPP1	0.0143736			SPP1	0.0143736	0.0782568	1.07551	2.10747	2092_s_at	up
CLIC4	chloride intracellular channel 4	CLIC4	0.0007084			CLIC4	0.0007084	0.01576	0.798569	1.73938	33891_at	up
TXNIP	thioredoxin interacting protein	TXNIP	0.0011314			TXNIP	0.0011314	0.01992	0.765783	1.70029	31508_at	up
SEPT10	septin 10	SEPT10	0.0026841			SEPT10	0.0026841	0.03115	0.657963	1.57785	38033_at	up
ID4	inhibitor of DNA binding 4, dominant negative helix-loop-helix protein	ID4	0.0040585			ID4	0.0040585	0.03915	0.785005	1.7231	41536_at	up
STAT1	signal transducer and activator of transcription 1, 91kDa	STAT1	0.0077914			STAT1	0.0077914	0.05619	-0.594464	0.66229	33339_g_at	down
PLA2G16	phospholipase A2, group XVI	PLA2G16	0.0094334			PLA2G16	0.0094334	0.06202	0.639914	1.55824	35704_at	up
NAPG	N-ethylmaleimide-sensitive factor attachment protein, gamma	NAPG	0.0001538			NAPG	0.0001538	0.00714	-0.761177	0.590015	40289_at	down
RAN	RAN, member RAS oncogene family	RAN	0.0040426			RAN	0.0040426	0.0363477	-0.578398	0.669707	1839_at	down
FRYL	FRY-like	FRYL	0.0073894			FRYL	0.0073894	0.05478	0.606121	1.52216	40492_at	up
MAPK9	mitogen-activated protein kinase 9	MAPK9	0.0021075			MAPK9	0.0021075	0.0267768	-0.615782	0.652576	1238_at	down
ZNF238	zinc finger protein 238	ZNF238	0.0001376			ZNF238	0.0001376	0.00681	-1.51221	0.350574	35825_s_at	down
DYNC1I1	dynein, cytoplasmic 1, intermediate chain 1	DYNC1I1	0.0017587			DYNC1I1	0.0017587	0.02552	-0.639804	0.6418	40319_at	down
KLHDC3	kelch domain containing 3	KLHDC3	4.49e-05			KLHDC3	4.49e-05	0.00505	-1.08427	0.47163	39537_at	down
PDLIM5	PDZ and LIM domain 5	PDLIM5	0.0009779			PDLIM5	0.0009779	0.0168039	0.69795	1.6222	37366_at	up
AHNAK	AHNAK nucleoprotein	AHNAK	0.0001346			AHNAK	0.0001346	0.00685	0.672399	1.59372	37027_at	up
ACTA1	actin, alpha 1, skeletal muscle	ACTA1	9e-07			ACTA1	9e-07	0.00108	-0.657608	0.633929	31737_at	down
RAB6A	RAB6A, member RAS oncogene family	RAB6A	0.0001043			RAB6A	0.0001043	0.00605	-1.15041	0.450496	622_at	down
SMARCA2	SWI/SNF related, matrix associated, actin dependent regulator of chromatin, subfamily a, member 2	SMARCA2	6.61e-05			SMARCA2	6.61e-05	0.00534	-0.679806	0.624249	40962_s_at	down
EFEMP1	EGF-containing fibulin-like extracellular matrix protein 1	EFEMP1	0.0016776			EFEMP1	0.0016776	0.02523	0.930865	1.90642	32551_at	up
TPPP	tubulin polymerization promoting protein	TPPP	0.0030667			TPPP	0.0030667	0.0334	-0.583988	0.667117	37465_at	down
SYN2	synapsin II	SYN2	3.08e-05			SYN2	3.08e-05	0.00424	-1.04519	0.484579	36748_at	down
PIK3C2A	phosphoinositide-3-kinase, class 2, alpha polypeptide	PIK3C2A	0.0001203			PIK3C2A	0.0001203	0.00647	0.582522	1.49746	36509_at	up
NEK7	NIMA (never in mitosis gene a)-related kinase 7	NEK7	0.0008225			NEK7	0.0008225	0.01679	0.636828	1.55491	34752_at	up
GO:0005737	cytoplasm	C	9.41807e-07	56/2430	0.000666799
PDE4DIP	phosphodiesterase 4D interacting protein	PDE4DIP	8e-05			PDE4DIP	8e-05	0.00573	0.821173	1.76684	36092_at	up
TOP2B	topoisomerase (DNA) II beta 180kDa	TOP2B	0.0031918			TOP2B	0.0031918	0.03417	-0.575788	0.67092	1581_s_at	down
CALM3	calmodulin 3 (phosphorylase kinase, delta)	CALM3	6.16e-05			CALM3	6.16e-05	0.00558	-1.49915	0.353761	41144_g_at	down
RIN2	Ras and Rab interactor 2	RIN2	4.32e-05			RIN2	4.32e-05	0.00518	0.614963	1.53152	36550_at	up
KANK1	KN motif and ankyrin repeat domains 1	KANK1	9.81e-05			KANK1	9.81e-05	0.00597	0.647671	1.56664	37225_at	up
BBOX1	butyrobetaine (gamma), 2-oxoglutarate dioxygenase (gamma-butyrobetaine hydroxylase) 1	BBOX1	0.0009746			BBOX1	0.0009746	0.01895	0.63136	1.54902	38339_at	up
KCNAB1	potassium voltage-gated channel, shaker-related subfamily, beta member 1	KCNAB1	0.0019864			KCNAB1	0.0019864	0.02733	-1.19657	0.43631	32711_g_at	down
CRYAB	crystallin, alpha B	CRYAB	0.0021194			CRYAB	0.0021194	0.0238509	0.685433	1.60818	32242_at	up
PDE4D	phosphodiesterase 4D, cAMP-specific (phosphodiesterase E3 dunce homolog, Drosophila)	PDE4D	0.0002783			PDE4D	0.0002783	0.00931	-0.62678	0.64762	38526_at	down
ENSA	endosulfine alpha	ENSA	0.0091385			ENSA	0.0091385	0.0573971	-0.665856	0.630315	39011_at	down
HTR2A	5-hydroxytryptamine (serotonin) receptor 2A	HTR2A	0.0084752			HTR2A	0.0084752	0.049011	-0.711074	0.610865	35469_at	down
GNAQ	guanine nucleotide binding protein (G protein), q polypeptide	GNAQ	0.0003599			GNAQ	0.0003599	0.01087	-0.754566	0.592725	38580_at	down
TAX1BP3	Tax1 (human T-cell leukemia virus type I) binding protein 3	TAX1BP3	0.0005354			TAX1BP3	0.0005354	0.01344	0.653897	1.57341	39416_at	up
PAK1	p21 protein (Cdc42/Rac)-activated kinase 1	PAK1	2.05e-05			PAK1	2.05e-05	0.00363	-1.36292	0.388794	1558_g_at	down
NUTF2	nuclear transport factor 2	NUTF2	0.0001084			NUTF2	0.0001084	0.0061	-0.701743	0.614829	31858_at	down
TSPYL2	TSPY-like 2	TSPYL2	0.0045402			TSPYL2	0.0045402	0.04154	-0.685964	0.62159	40165_at	down
RDX	radixin	RDX	1.9e-06			RDX	1.9e-06	0.00178	0.64221	1.56072	34887_at	up
WNK1	WNK lysine deficient protein kinase 1	WNK1	2.71e-05			WNK1	2.71e-05	0.00437	0.651698	1.57102	32185_at	up
WWTR1	WW domain containing transcription regulator 1	WWTR1	0.000166			WWTR1	0.000166	0.00743	0.898923	1.86467	33876_at	up
ATP2B2	ATPase, Ca++ transporting, plasma membrane 2	ATP2B2	6.99e-05			ATP2B2	6.99e-05	0.00557508	-1.00775	0.497321	37053_at	down
CPNE3	copine III	CPNE3	0.0208618			CPNE3	0.0208618	0.09735	0.601429	1.51722	39706_at	up
RGS20	regulator of G-protein signaling 20	RGS20	0.0051704			RGS20	0.0051704	0.04466	0.768938	1.70402	41086_at	up
PRKCZ	protein kinase C, zeta	PRKCZ	0.0016128			PRKCZ	0.0016128	0.02455	-0.59451	0.66227	362_at	down
ANK2	ankyrin 2, neuronal	ANK2	0.0006227			ANK2	0.0006227	0.01473	-0.718494	0.607732	39850_at	down
CALB1	calbindin 1, 28kDa	CALB1	0.000707			CALB1	0.000707	0.01582	-0.698186	0.616346	36570_at	down
VIM	vimentin	VIM	0.0011799			VIM	0.0011799	0.02038	0.633233	1.55104	34091_s_at	up
DDIT4	DNA-damage-inducible transcript 4	DDIT4	0.001298			DDIT4	0.001298	0.02133	0.912218	1.88194	39827_at	up
DDX3X	DEAD (Asp-Glu-Ala-Asp) box polypeptide 3, X-linked	DDX3X	0.0002115			DDX3X	0.0002115	0.00827	-0.825195	0.564406	826_at	down
GJA1	gap junction protein, alpha 1, 43kDa	GJA1	0.003181			GJA1	0.003181	0.03415	0.605087	1.52107	32531_at	up
ABI2	abl-interactor 2	ABI2	4.99e-05			ABI2	4.99e-05	0.00501	-1.1962	0.436423	36448_at	down
TGOLN2	trans-golgi network protein 2	TGOLN2	0.0037269			TGOLN2	0.0037269	0.03691	-0.623205	0.649227	31827_s_at	down
HSP90AB1	heat shock protein 90kDa alpha (cytosolic), class B member 1	HSP90AB1	0.0010452			HSP90AB1	0.0010452	0.01961	-0.809161	0.570714	33986_r_at	down
PRKCB	protein kinase C, beta	PRKCB	0.005086			PRKCB	0.005086	0.0379278	-1.11601	0.461367	1217_g_at	down
BCAS1	breast carcinoma amplified sequence 1	BCAS1	0.0140951			BCAS1	0.0140951	0.07849	0.639552	1.55785	37821_at	up
KIF1B	kinesin family member 1B	KIF1B	0.0001724			KIF1B	0.0001724	0.00753	-0.824181	0.564803	34924_at	down
PALLD	palladin, cytoskeletal associated protein	PALLD	0.0004577			PALLD	0.0004577	0.01269	0.688077	1.61113	41191_at	up
FKBP1A	FK506 binding protein 1A, 12kDa	FKBP1A	1.63e-05			FKBP1A	1.63e-05	0.00318	-1.08851	0.470247	953_g_at	down
CD99	CD99 molecule	CD99	0.0068295			CD99	0.0068295	0.05274	0.679723	1.60183	41138_at	up
PDLIM3	PDZ and LIM domain 3	PDLIM3	0.0119253			PDLIM3	0.0119253	0.07121	0.704873	1.63	39690_at	up
CLIC4	chloride intracellular channel 4	CLIC4	0.0007084			CLIC4	0.0007084	0.01576	0.798569	1.73938	33891_at	up
TXNIP	thioredoxin interacting protein	TXNIP	0.0011314			TXNIP	0.0011314	0.01992	0.765783	1.70029	31508_at	up
SEPT10	septin 10	SEPT10	0.0026841			SEPT10	0.0026841	0.03115	0.657963	1.57785	38033_at	up
STAT1	signal transducer and activator of transcription 1, 91kDa	STAT1	0.0077914			STAT1	0.0077914	0.05619	-0.594464	0.66229	33339_g_at	down
PITPNB	phosphatidylinositol transfer protein, beta	PITPNB	6.72e-05			PITPNB	6.72e-05	0.0052	-0.649397	0.637547	353_at	down
MAP2	microtubule-associated protein 2	MAP2	0.0003213			MAP2	0.0003213	0.00748866	-1.01267	0.495627	183_at	down
HEBP2	heme binding protein 2	HEBP2	0.0011506			HEBP2	0.0011506	0.02006	0.705517	1.63073	41454_at	up
MAPT	microtubule-associated protein tau	MAPT	0.0003474			MAPT	0.0003474	0.010582	-0.828125	0.563261	113_i_at	down
DPYSL3	dihydropyrimidinase-like 3	DPYSL3	7.82e-05			DPYSL3	7.82e-05	0.00559	0.590194	1.50545	36149_at	up
RAN	RAN, member RAS oncogene family	RAN	0.0040426			RAN	0.0040426	0.0363477	-0.578398	0.669707	1839_at	down
KLHDC3	kelch domain containing 3	KLHDC3	4.49e-05			KLHDC3	4.49e-05	0.00505	-1.08427	0.47163	39537_at	down
ACTA1	actin, alpha 1, skeletal muscle	ACTA1	9e-07			ACTA1	9e-07	0.00108	-0.657608	0.633929	31737_at	down
PCMT1	protein-L-isoaspartate (D-aspartate) O-methyltransferase	PCMT1	0.0001396			PCMT1	0.0001396	0.00682	-1.18913	0.438568	37738_g_at	down
PIK3C2A	phosphoinositide-3-kinase, class 2, alpha polypeptide	PIK3C2A	0.0001203			PIK3C2A	0.0001203	0.00647	0.582522	1.49746	36509_at	up
YWHAZ	tyrosine 3-monooxygenase/tryptophan 5-monooxygenase activation protein, zeta polypeptide	YWHAZ	0.0001042			YWHAZ	0.0001042	0.00614	-1.30208	0.405542	34642_at	down
NEK7	NIMA (never in mitosis gene a)-related kinase 7	NEK7	0.0008225			NEK7	0.0008225	0.01679	0.636828	1.55491	34752_at	up
BCL11A	B-cell CLL/lymphoma 11A (zinc finger protein)	BCL11A	1.06e-05			BCL11A	1.06e-05	0.00245	-0.945066	0.519406	41356_at	down
GO:0005856	cytoskeleton	C	9.50206e-06	13/271	0.00672746
PDE4D	phosphodiesterase 4D, cAMP-specific (phosphodiesterase E3 dunce homolog, Drosophila)	PDE4D	0.0002783			PDE4D	0.0002783	0.00931	-0.62678	0.64762	38526_at	down
RDX	radixin	RDX	1.9e-06			RDX	1.9e-06	0.00178	0.64221	1.56072	34887_at	up
FRMPD4	FERM and PDZ domain containing 4	FRMPD4	8.63e-05			FRMPD4	8.63e-05	0.00562	-0.889778	0.539697	35030_i_at	down
ANK2	ankyrin 2, neuronal	ANK2	0.0006227			ANK2	0.0006227	0.01473	-0.718494	0.607732	39850_at	down
VIM	vimentin	VIM	0.0011799			VIM	0.0011799	0.02038	0.633233	1.55104	34091_s_at	up
ABI2	abl-interactor 2	ABI2	4.99e-05			ABI2	4.99e-05	0.00501	-1.1962	0.436423	36448_at	down
KIF1B	kinesin family member 1B	KIF1B	0.0001724			KIF1B	0.0001724	0.00753	-0.824181	0.564803	34924_at	down
PALLD	palladin, cytoskeletal associated protein	PALLD	0.0004577			PALLD	0.0004577	0.01269	0.688077	1.61113	41191_at	up
MYO10	myosin X	MYO10	0.0001896			MYO10	0.0001896	0.00783	0.804546	1.7466	35362_at	up
MAP2	microtubule-associated protein 2	MAP2	0.0003213			MAP2	0.0003213	0.00748866	-1.01267	0.495627	183_at	down
MAPT	microtubule-associated protein tau	MAPT	0.0003474			MAPT	0.0003474	0.010582	-0.828125	0.563261	113_i_at	down
DPYSL3	dihydropyrimidinase-like 3	DPYSL3	7.82e-05			DPYSL3	7.82e-05	0.00559	0.590194	1.50545	36149_at	up
ACTA1	actin, alpha 1, skeletal muscle	ACTA1	9e-07			ACTA1	9e-07	0.00108	-0.657608	0.633929	31737_at	down
GO:0005524	ATP binding	F	1.66835e-05	27/931	0.0118119
TOP2B	topoisomerase (DNA) II beta 180kDa	TOP2B	0.0031918			TOP2B	0.0031918	0.03417	-0.575788	0.67092	1581_s_at	down
CAMK2A	calcium/calmodulin-dependent protein kinase II alpha	CAMK2A	0.0030407			CAMK2A	0.0030407	0.03322	-0.693331	0.618424	31813_at	down
PAK1	p21 protein (Cdc42/Rac)-activated kinase 1	PAK1	2.05e-05			PAK1	2.05e-05	0.00363	-1.36292	0.388794	1558_g_at	down
ITPKB	inositol 1,4,5-trisphosphate 3-kinase B	ITPKB	0.0001007			ITPKB	0.0001007	0.00603	0.739727	1.66986	37272_at	up
WNK1	WNK lysine deficient protein kinase 1	WNK1	2.71e-05			WNK1	2.71e-05	0.00437	0.651698	1.57102	32185_at	up
ATP5A1	ATP synthase, H+ transporting, mitochondrial F1 complex, alpha subunit 1, cardiac muscle	ATP5A1	0.0027468			ATP5A1	0.0027468	0.03159	-0.946218	0.518991	40096_at	down
ATP2B2	ATPase, Ca++ transporting, plasma membrane 2	ATP2B2	6.99e-05			ATP2B2	6.99e-05	0.00557508	-1.00775	0.497321	37053_at	down
PRKCZ	protein kinase C, zeta	PRKCZ	0.0016128			PRKCZ	0.0016128	0.02455	-0.59451	0.66227	362_at	down
DDX3X	DEAD (Asp-Glu-Ala-Asp) box polypeptide 3, X-linked	DDX3X	0.0002115			DDX3X	0.0002115	0.00827	-0.825195	0.564406	826_at	down
ITPKA	inositol 1,4,5-trisphosphate 3-kinase A	ITPKA	5.21e-05			ITPKA	5.21e-05	0.00509	-0.850905	0.554437	118_at	down
FGFR3	fibroblast growth factor receptor 3	FGFR3	0.0003844			FGFR3	0.0003844	0.01142	0.632415	1.55016	31805_at	up
HSP90AB1	heat shock protein 90kDa alpha (cytosolic), class B member 1	HSP90AB1	0.0010452			HSP90AB1	0.0010452	0.01961	-0.809161	0.570714	33986_r_at	down
HSPA2	heat shock 70kDa protein 2	HSPA2	0.0047734			HSPA2	0.0047734	0.039907	0.791771	1.7312	36925_at	up
RHOBTB3	Rho-related BTB domain containing 3	RHOBTB3	0.0030889			RHOBTB3	0.0030889	0.0258272	0.918569	1.89024	32215_i_at	up
ACTL6A	actin-like 6A	ACTL6A	0.0046062			ACTL6A	0.0046062	0.04183	0.649623	1.56876	41278_at	up
PRKCB	protein kinase C, beta	PRKCB	0.005086			PRKCB	0.005086	0.0379278	-1.11601	0.461367	1217_g_at	down
KIF1B	kinesin family member 1B	KIF1B	0.0001724			KIF1B	0.0001724	0.00753	-0.824181	0.564803	34924_at	down
MYO10	myosin X	MYO10	0.0001896			MYO10	0.0001896	0.00783	0.804546	1.7466	35362_at	up
MAPK9	mitogen-activated protein kinase 9	MAPK9	0.0021075			MAPK9	0.0021075	0.0267768	-0.615782	0.652576	1238_at	down
PAK3	p21 protein (Cdc42/Rac)-activated kinase 3	PAK3	0.002674			PAK3	0.002674	0.03133	-0.712977	0.61006	33074_g_at	down
PIP4K2A	phosphatidylinositol-5-phosphate 4-kinase, type II, alpha	PIP4K2A	0.0007009			PIP4K2A	0.0007009	0.01578	0.696632	1.62072	35310_at	up
ACTA1	actin, alpha 1, skeletal muscle	ACTA1	9e-07			ACTA1	9e-07	0.00108	-0.657608	0.633929	31737_at	down
SMARCA2	SWI/SNF related, matrix associated, actin dependent regulator of chromatin, subfamily a, member 2	SMARCA2	6.61e-05			SMARCA2	6.61e-05	0.00534	-0.679806	0.624249	40962_s_at	down
SYN2	synapsin II	SYN2	3.08e-05			SYN2	3.08e-05	0.00424	-1.04519	0.484579	36748_at	down
PIK3C2A	phosphoinositide-3-kinase, class 2, alpha polypeptide	PIK3C2A	0.0001203			PIK3C2A	0.0001203	0.00647	0.582522	1.49746	36509_at	up
NEK7	NIMA (never in mitosis gene a)-related kinase 7	NEK7	0.0008225			NEK7	0.0008225	0.01679	0.636828	1.55491	34752_at	up
ERBB3	v-erb-b2 erythroblastic leukemia viral oncogene homolog 3 (avian)	ERBB3	0.0007473			ERBB3	0.0007473	0.01595	0.583372	1.49835	1585_at	up
GO:0004871	signal transducer activity	F	2.33666e-05	10/184	0.0165436
GNB5	guanine nucleotide binding protein (G protein), beta 5	GNB5	0.0002087			GNB5	0.0002087	0.00825	-0.677141	0.625403	38176_at	down
GNAQ	guanine nucleotide binding protein (G protein), q polypeptide	GNAQ	0.0003599			GNAQ	0.0003599	0.01087	-0.754566	0.592725	38580_at	down
RGS4	regulator of G-protein signaling 4	RGS4	0.0089282			RGS4	0.0089282	0.0545706	-0.827816	0.563381	34272_at	down
RGS20	regulator of G-protein signaling 20	RGS20	0.0051704			RGS20	0.0051704	0.04466	0.768938	1.70402	41086_at	up
GJA1	gap junction protein, alpha 1, 43kDa	GJA1	0.003181			GJA1	0.003181	0.03415	0.605087	1.52107	32531_at	up
GNG12	guanine nucleotide binding protein (G protein), gamma 12	GNG12	0.0014473			GNG12	0.0014473	0.02288	0.66052	1.58065	38079_at	up
FKBP1A	FK506 binding protein 1A, 12kDa	FKBP1A	1.63e-05			FKBP1A	1.63e-05	0.00318	-1.08851	0.470247	953_g_at	down
STAT1	signal transducer and activator of transcription 1, 91kDa	STAT1	0.0077914			STAT1	0.0077914	0.05619	-0.594464	0.66229	33339_g_at	down
LITAF	lipopolysaccharide-induced TNF factor	LITAF	0.0121081			LITAF	0.0121081	0.07161	0.864586	1.82082	37024_at	up
GNG11	guanine nucleotide binding protein (G protein), gamma 11	GNG11	0.0217966			GNG11	0.0217966	0.09946	0.642485	1.56102	37908_at	up
GO:0003924	GTPase activity	F	3.08598e-05	8/125	0.0218487
GNB5	guanine nucleotide binding protein (G protein), beta 5	GNB5	0.0002087			GNB5	0.0002087	0.00825	-0.677141	0.625403	38176_at	down
RAP2A	RAP2A, member of RAS oncogene family	RAP2A	0.0003335			RAP2A	0.0003335	0.01041	-1.32505	0.399135	41317_at	down
GNAQ	guanine nucleotide binding protein (G protein), q polypeptide	GNAQ	0.0003599			GNAQ	0.0003599	0.01087	-0.754566	0.592725	38580_at	down
TUBA4A	tubulin, alpha 4a	TUBA4A	0.0186178			TUBA4A	0.0186178	0.09147	-0.653153	0.635889	330_s_at	down
RAB5A	RAB5A, member RAS oncogene family	RAB5A	0.002247			RAB5A	0.002247	0.02918	-0.672972	0.627213	600_at	down
RAN	RAN, member RAS oncogene family	RAN	0.0040426			RAN	0.0040426	0.0363477	-0.578398	0.669707	1839_at	down
GNG11	guanine nucleotide binding protein (G protein), gamma 11	GNG11	0.0217966			GNG11	0.0217966	0.09946	0.642485	1.56102	37908_at	up
RAB6A	RAB6A, member RAS oncogene family	RAB6A	0.0001043			RAB6A	0.0001043	0.00605	-1.15041	0.450496	622_at	down
GO:0007165	signal transduction	P	4.31589e-05	26/928	0.0305565
RIN2	Ras and Rab interactor 2	RIN2	4.32e-05			RIN2	4.32e-05	0.00518	0.614963	1.53152	36550_at	up
GABRB3	gamma-aminobutyric acid (GABA) A receptor, beta 3	GABRB3	3e-07			GABRB3	3e-07	0.00119	-1.10424	0.465146	31817_at	down
GNB5	guanine nucleotide binding protein (G protein), beta 5	GNB5	0.0002087			GNB5	0.0002087	0.00825	-0.677141	0.625403	38176_at	down
RAP2A	RAP2A, member of RAS oncogene family	RAP2A	0.0003335			RAP2A	0.0003335	0.01041	-1.32505	0.399135	41317_at	down
PDE4D	phosphodiesterase 4D, cAMP-specific (phosphodiesterase E3 dunce homolog, Drosophila)	PDE4D	0.0002783			PDE4D	0.0002783	0.00931	-0.62678	0.64762	38526_at	down
HTR2A	5-hydroxytryptamine (serotonin) receptor 2A	HTR2A	0.0084752			HTR2A	0.0084752	0.049011	-0.711074	0.610865	35469_at	down
GNAQ	guanine nucleotide binding protein (G protein), q polypeptide	GNAQ	0.0003599			GNAQ	0.0003599	0.01087	-0.754566	0.592725	38580_at	down
CAP2	CAP, adenylate cyclase-associated protein, 2 (yeast)	CAP2	0.0081816			CAP2	0.0081816	0.0451738	-0.751968	0.593793	693_g_at	down
ITPKB	inositol 1,4,5-trisphosphate 3-kinase B	ITPKB	0.0001007			ITPKB	0.0001007	0.00603	0.739727	1.66986	37272_at	up
FGF2	fibroblast growth factor 2 (basic)	FGF2	0.0094126			FGF2	0.0094126	0.06199	0.609138	1.52535	1593_at	up
RASSF2	Ras association (RalGDS/AF-6) domain family member 2	RASSF2	4.33e-05			RASSF2	4.33e-05	0.00503	0.687416	1.6104	37598_at	up
ANK2	ankyrin 2, neuronal	ANK2	0.0006227			ANK2	0.0006227	0.01473	-0.718494	0.607732	39850_at	down
ITPKA	inositol 1,4,5-trisphosphate 3-kinase A	ITPKA	5.21e-05			ITPKA	5.21e-05	0.00509	-0.850905	0.554437	118_at	down
GNG12	guanine nucleotide binding protein (G protein), gamma 12	GNG12	0.0014473			GNG12	0.0014473	0.02288	0.66052	1.58065	38079_at	up
ACTL6A	actin-like 6A	ACTL6A	0.0046062			ACTL6A	0.0046062	0.04183	0.649623	1.56876	41278_at	up
FGF1	fibroblast growth factor 1 (acidic)	FGF1	6.42e-05			FGF1	6.42e-05	0.00542	0.84278	1.7935	996_at	up
CRH	corticotropin releasing hormone	CRH	0.0017084			CRH	0.0017084	0.02538	-0.86641	0.54851	40382_at	down
STAT1	signal transducer and activator of transcription 1, 91kDa	STAT1	0.0077914			STAT1	0.0077914	0.05619	-0.594464	0.66229	33339_g_at	down
MYO10	myosin X	MYO10	0.0001896			MYO10	0.0001896	0.00783	0.804546	1.7466	35362_at	up
DPYSL3	dihydropyrimidinase-like 3	DPYSL3	7.82e-05			DPYSL3	7.82e-05	0.00559	0.590194	1.50545	36149_at	up
RAN	RAN, member RAS oncogene family	RAN	0.0040426			RAN	0.0040426	0.0363477	-0.578398	0.669707	1839_at	down
FGF12	fibroblast growth factor 12	FGF12	6.26e-05			FGF12	6.26e-05	0.00541	-0.846144	0.556269	41673_at	down
GNG11	guanine nucleotide binding protein (G protein), gamma 11	GNG11	0.0217966			GNG11	0.0217966	0.09946	0.642485	1.56102	37908_at	up
S1PR1	sphingosine-1-phosphate receptor 1	S1PR1	0.0053845			S1PR1	0.0053845	0.04566	0.876704	1.83618	587_at	up
INPP4A	inositol polyphosphate-4-phosphatase, type I, 107kDa	INPP4A	9.21e-05			INPP4A	9.21e-05	0.0057	-0.683297	0.622741	35924_at	down
YWHAZ	tyrosine 3-monooxygenase/tryptophan 5-monooxygenase activation protein, zeta polypeptide	YWHAZ	0.0001042			YWHAZ	0.0001042	0.00614	-1.30208	0.405542	34642_at	down
GO:0000166	nucleotide binding	F	5.86849e-05	31/1220	0.0415489
TOP2B	topoisomerase (DNA) II beta 180kDa	TOP2B	0.0031918			TOP2B	0.0031918	0.03417	-0.575788	0.67092	1581_s_at	down
RAP2A	RAP2A, member of RAS oncogene family	RAP2A	0.0003335			RAP2A	0.0003335	0.01041	-1.32505	0.399135	41317_at	down
GNAQ	guanine nucleotide binding protein (G protein), q polypeptide	GNAQ	0.0003599			GNAQ	0.0003599	0.01087	-0.754566	0.592725	38580_at	down
CAMK2A	calcium/calmodulin-dependent protein kinase II alpha	CAMK2A	0.0030407			CAMK2A	0.0030407	0.03322	-0.693331	0.618424	31813_at	down
PAK1	p21 protein (Cdc42/Rac)-activated kinase 1	PAK1	2.05e-05			PAK1	2.05e-05	0.00363	-1.36292	0.388794	1558_g_at	down
ITPKB	inositol 1,4,5-trisphosphate 3-kinase B	ITPKB	0.0001007			ITPKB	0.0001007	0.00603	0.739727	1.66986	37272_at	up
TUBA4A	tubulin, alpha 4a	TUBA4A	0.0186178			TUBA4A	0.0186178	0.09147	-0.653153	0.635889	330_s_at	down
WNK1	WNK lysine deficient protein kinase 1	WNK1	2.71e-05			WNK1	2.71e-05	0.00437	0.651698	1.57102	32185_at	up
ATP5A1	ATP synthase, H+ transporting, mitochondrial F1 complex, alpha subunit 1, cardiac muscle	ATP5A1	0.0027468			ATP5A1	0.0027468	0.03159	-0.946218	0.518991	40096_at	down
ATP2B2	ATPase, Ca++ transporting, plasma membrane 2	ATP2B2	6.99e-05			ATP2B2	6.99e-05	0.00557508	-1.00775	0.497321	37053_at	down
PRKCZ	protein kinase C, zeta	PRKCZ	0.0016128			PRKCZ	0.0016128	0.02455	-0.59451	0.66227	362_at	down
DDX3X	DEAD (Asp-Glu-Ala-Asp) box polypeptide 3, X-linked	DDX3X	0.0002115			DDX3X	0.0002115	0.00827	-0.825195	0.564406	826_at	down
ITPKA	inositol 1,4,5-trisphosphate 3-kinase A	ITPKA	5.21e-05			ITPKA	5.21e-05	0.00509	-0.850905	0.554437	118_at	down
FGFR3	fibroblast growth factor receptor 3	FGFR3	0.0003844			FGFR3	0.0003844	0.01142	0.632415	1.55016	31805_at	up
HSP90AB1	heat shock protein 90kDa alpha (cytosolic), class B member 1	HSP90AB1	0.0010452			HSP90AB1	0.0010452	0.01961	-0.809161	0.570714	33986_r_at	down
HSPA2	heat shock 70kDa protein 2	HSPA2	0.0047734			HSPA2	0.0047734	0.039907	0.791771	1.7312	36925_at	up
PRKCB	protein kinase C, beta	PRKCB	0.005086			PRKCB	0.005086	0.0379278	-1.11601	0.461367	1217_g_at	down
KIF1B	kinesin family member 1B	KIF1B	0.0001724			KIF1B	0.0001724	0.00753	-0.824181	0.564803	34924_at	down
RAB5A	RAB5A, member RAS oncogene family	RAB5A	0.002247			RAB5A	0.002247	0.02918	-0.672972	0.627213	600_at	down
SEPT10	septin 10	SEPT10	0.0026841			SEPT10	0.0026841	0.03115	0.657963	1.57785	38033_at	up
MYO10	myosin X	MYO10	0.0001896			MYO10	0.0001896	0.00783	0.804546	1.7466	35362_at	up
RAN	RAN, member RAS oncogene family	RAN	0.0040426			RAN	0.0040426	0.0363477	-0.578398	0.669707	1839_at	down
MAPK9	mitogen-activated protein kinase 9	MAPK9	0.0021075			MAPK9	0.0021075	0.0267768	-0.615782	0.652576	1238_at	down
PAK3	p21 protein (Cdc42/Rac)-activated kinase 3	PAK3	0.002674			PAK3	0.002674	0.03133	-0.712977	0.61006	33074_g_at	down
PIP4K2A	phosphatidylinositol-5-phosphate 4-kinase, type II, alpha	PIP4K2A	0.0007009			PIP4K2A	0.0007009	0.01578	0.696632	1.62072	35310_at	up
ACTA1	actin, alpha 1, skeletal muscle	ACTA1	9e-07			ACTA1	9e-07	0.00108	-0.657608	0.633929	31737_at	down
RAB6A	RAB6A, member RAS oncogene family	RAB6A	0.0001043			RAB6A	0.0001043	0.00605	-1.15041	0.450496	622_at	down
SMARCA2	SWI/SNF related, matrix associated, actin dependent regulator of chromatin, subfamily a, member 2	SMARCA2	6.61e-05			SMARCA2	6.61e-05	0.00534	-0.679806	0.624249	40962_s_at	down
PIK3C2A	phosphoinositide-3-kinase, class 2, alpha polypeptide	PIK3C2A	0.0001203			PIK3C2A	0.0001203	0.00647	0.582522	1.49746	36509_at	up
NEK7	NIMA (never in mitosis gene a)-related kinase 7	NEK7	0.0008225			NEK7	0.0008225	0.01679	0.636828	1.55491	34752_at	up
ERBB3	v-erb-b2 erythroblastic leukemia viral oncogene homolog 3 (avian)	ERBB3	0.0007473			ERBB3	0.0007473	0.01595	0.583372	1.49835	1585_at	up
GO:0005516	calmodulin binding	F	0.000303379	6/101	0.214792
CAMK2A	calcium/calmodulin-dependent protein kinase II alpha	CAMK2A	0.0030407			CAMK2A	0.0030407	0.03322	-0.693331	0.618424	31813_at	down
ITPKB	inositol 1,4,5-trisphosphate 3-kinase B	ITPKB	0.0001007			ITPKB	0.0001007	0.00603	0.739727	1.66986	37272_at	up
RGS4	regulator of G-protein signaling 4	RGS4	0.0089282			RGS4	0.0089282	0.0545706	-0.827816	0.563381	34272_at	down
ATP2B2	ATPase, Ca++ transporting, plasma membrane 2	ATP2B2	6.99e-05			ATP2B2	6.99e-05	0.00557508	-1.00775	0.497321	37053_at	down
ITPKA	inositol 1,4,5-trisphosphate 3-kinase A	ITPKA	5.21e-05			ITPKA	5.21e-05	0.00509	-0.850905	0.554437	118_at	down
MAP2	microtubule-associated protein 2	MAP2	0.0003213			MAP2	0.0003213	0.00748866	-1.01267	0.495627	183_at	down
GO:0005874	microtubule	C	0.000632299	6/114	0.447668
MAP1B	microtubule-associated protein 1B	MAP1B	2.11e-05			MAP1B	2.11e-05	0.00356	-1.23808	0.423935	39531_at	down
TUBA4A	tubulin, alpha 4a	TUBA4A	0.0186178			TUBA4A	0.0186178	0.09147	-0.653153	0.635889	330_s_at	down
KIF1B	kinesin family member 1B	KIF1B	0.0001724			KIF1B	0.0001724	0.00753	-0.824181	0.564803	34924_at	down
MAP2	microtubule-associated protein 2	MAP2	0.0003213			MAP2	0.0003213	0.00748866	-1.01267	0.495627	183_at	down
MAPT	microtubule-associated protein tau	MAPT	0.0003474			MAPT	0.0003474	0.010582	-0.828125	0.563261	113_i_at	down
DYNC1I1	dynein, cytoplasmic 1, intermediate chain 1	DYNC1I1	0.0017587			DYNC1I1	0.0017587	0.02552	-0.639804	0.6418	40319_at	down
GO:0030054	cell junction	C	0.0014824	8/210	1
SCAMP5	secretory carrier membrane protein 5	SCAMP5	0.0048192			SCAMP5	0.0048192	0.04303	-0.684989	0.622011	37546_r_at	down
GABRB3	gamma-aminobutyric acid (GABA) A receptor, beta 3	GABRB3	3e-07			GABRB3	3e-07	0.00119	-1.10424	0.465146	31817_at	down
CAMK2A	calcium/calmodulin-dependent protein kinase II alpha	CAMK2A	0.0030407			CAMK2A	0.0030407	0.03322	-0.693331	0.618424	31813_at	down
PAK1	p21 protein (Cdc42/Rac)-activated kinase 1	PAK1	2.05e-05			PAK1	2.05e-05	0.00363	-1.36292	0.388794	1558_g_at	down
GRIN2A	glutamate receptor, ionotropic, N-methyl D-aspartate 2A	GRIN2A	4.6e-06			GRIN2A	4.6e-06	0.00243	-0.900695	0.535629	38236_at	down
GJA1	gap junction protein, alpha 1, 43kDa	GJA1	0.003181			GJA1	0.003181	0.03415	0.605087	1.52107	32531_at	up
DLGAP1	discs, large (Drosophila) homolog-associated protein 1	DLGAP1	0.0021466			DLGAP1	0.0021466	0.02878	-0.633301	0.6447	40388_at	down
SYN2	synapsin II	SYN2	3.08e-05			SYN2	3.08e-05	0.00424	-1.04519	0.484579	36748_at	down
GO:0007186	G-protein coupled receptor protein signaling pathway	P	0.00179954	8/216	1
CALM3	calmodulin 3 (phosphorylase kinase, delta)	CALM3	6.16e-05			CALM3	6.16e-05	0.00558	-1.49915	0.353761	41144_g_at	down
GNB5	guanine nucleotide binding protein (G protein), beta 5	GNB5	0.0002087			GNB5	0.0002087	0.00825	-0.677141	0.625403	38176_at	down
GNAQ	guanine nucleotide binding protein (G protein), q polypeptide	GNAQ	0.0003599			GNAQ	0.0003599	0.01087	-0.754566	0.592725	38580_at	down
ENPP2	ectonucleotide pyrophosphatase/phosphodiesterase 2	ENPP2	0.0072419			ENPP2	0.0072419	0.0536232	0.680149	1.60231	41123_s_at	up
GNG12	guanine nucleotide binding protein (G protein), gamma 12	GNG12	0.0014473			GNG12	0.0014473	0.02288	0.66052	1.58065	38079_at	up
GNG11	guanine nucleotide binding protein (G protein), gamma 11	GNG11	0.0217966			GNG11	0.0217966	0.09946	0.642485	1.56102	37908_at	up
S1PR1	sphingosine-1-phosphate receptor 1	S1PR1	0.0053845			S1PR1	0.0053845	0.04566	0.876704	1.83618	587_at	up
SST	somatostatin	SST	0.0001518			SST	0.0001518	0.00714	-1.10261	0.465674	37782_at	down
GO:0045202	synapse	C	0.00218271	6/141	1
SCAMP5	secretory carrier membrane protein 5	SCAMP5	0.0048192			SCAMP5	0.0048192	0.04303	-0.684989	0.622011	37546_r_at	down
GABRB3	gamma-aminobutyric acid (GABA) A receptor, beta 3	GABRB3	3e-07			GABRB3	3e-07	0.00119	-1.10424	0.465146	31817_at	down
CAMK2A	calcium/calmodulin-dependent protein kinase II alpha	CAMK2A	0.0030407			CAMK2A	0.0030407	0.03322	-0.693331	0.618424	31813_at	down
GRIN2A	glutamate receptor, ionotropic, N-methyl D-aspartate 2A	GRIN2A	4.6e-06			GRIN2A	4.6e-06	0.00243	-0.900695	0.535629	38236_at	down
DLGAP1	discs, large (Drosophila) homolog-associated protein 1	DLGAP1	0.0021466			DLGAP1	0.0021466	0.02878	-0.633301	0.6447	40388_at	down
SYN2	synapsin II	SYN2	3.08e-05			SYN2	3.08e-05	0.00424	-1.04519	0.484579	36748_at	down
GO:0042470	melanosome	C	0.00236869	4/73	1
HSP90AB1	heat shock protein 90kDa alpha (cytosolic), class B member 1	HSP90AB1	0.0010452			HSP90AB1	0.0010452	0.01961	-0.809161	0.570714	33986_r_at	down
RAB5A	RAB5A, member RAS oncogene family	RAB5A	0.002247			RAB5A	0.002247	0.02918	-0.672972	0.627213	600_at	down
RAN	RAN, member RAS oncogene family	RAN	0.0040426			RAN	0.0040426	0.0363477	-0.578398	0.669707	1839_at	down
YWHAZ	tyrosine 3-monooxygenase/tryptophan 5-monooxygenase activation protein, zeta polypeptide	YWHAZ	0.0001042			YWHAZ	0.0001042	0.00614	-1.30208	0.405542	34642_at	down
GO:0005509	calcium ion binding	F	0.00261395	14/519	1
CALM3	calmodulin 3 (phosphorylase kinase, delta)	CALM3	6.16e-05			CALM3	6.16e-05	0.00558	-1.49915	0.353761	41144_g_at	down
VCAN	versican	VCAN	0.0005119			VCAN	0.0005119	0.0130669	0.695197	1.61911	38111_at	up
CLTB	clathrin, light chain (Lcb)	CLTB	0.0010551			CLTB	0.0010551	0.01959	-0.578044	0.669872	32523_at	down
MAN1A1	mannosidase, alpha, class 1A, member 1	MAN1A1	0.0023499			MAN1A1	0.0023499	0.02989	-0.723092	0.605798	39613_at	down
GRIN2A	glutamate receptor, ionotropic, N-methyl D-aspartate 2A	GRIN2A	4.6e-06			GRIN2A	4.6e-06	0.00243	-0.900695	0.535629	38236_at	down
ATP2B2	ATPase, Ca++ transporting, plasma membrane 2	ATP2B2	6.99e-05			ATP2B2	6.99e-05	0.00557508	-1.00775	0.497321	37053_at	down
NRXN1	neurexin 1	NRXN1	0.0053364			NRXN1	0.0053364	0.04536	-0.591329	0.663731	39240_at	down
CALB1	calbindin 1, 28kDa	CALB1	0.000707			CALB1	0.000707	0.01582	-0.698186	0.616346	36570_at	down
PRKCB	protein kinase C, beta	PRKCB	0.005086			PRKCB	0.005086	0.0379278	-1.11601	0.461367	1217_g_at	down
STAT1	signal transducer and activator of transcription 1, 91kDa	STAT1	0.0077914			STAT1	0.0077914	0.05619	-0.594464	0.66229	33339_g_at	down
LRP4	low density lipoprotein receptor-related protein 4	LRP4	0.0019495			LRP4	0.0019495	0.02702	0.642435	1.56096	36059_at	up
MEGF8	multiple EGF-like-domains 8	MEGF8	0.0001152			MEGF8	0.0001152	0.00629	-0.809208	0.570695	35394_at	down
CACNB2	calcium channel, voltage-dependent, beta 2 subunit	CACNB2	5e-06			CACNB2	5e-06	0.00205	-0.628089	0.647033	39647_s_at	down
EFEMP1	EGF-containing fibulin-like extracellular matrix protein 1	EFEMP1	0.0016776			EFEMP1	0.0016776	0.02523	0.930865	1.90642	32551_at	up
GO:0051082	unfolded protein binding	F	0.00299157	4/77	1
CRYAB	crystallin, alpha B	CRYAB	0.0021194			CRYAB	0.0021194	0.0238509	0.685433	1.60818	32242_at	up
DNAJB4	DnaJ (Hsp40) homolog, subfamily B, member 4	DNAJB4	0.0013721			DNAJB4	0.0013721	0.02216	-0.649588	0.637463	158_at	down
HSP90AB1	heat shock protein 90kDa alpha (cytosolic), class B member 1	HSP90AB1	0.0010452			HSP90AB1	0.0010452	0.01961	-0.809161	0.570714	33986_r_at	down
HSPA2	heat shock 70kDa protein 2	HSPA2	0.0047734			HSPA2	0.0047734	0.039907	0.791771	1.7312	36925_at	up
GO:0005198	structural molecule activity	F	0.00322352	5/113	1
MAP1B	microtubule-associated protein 1B	MAP1B	2.11e-05			MAP1B	2.11e-05	0.00356	-1.23808	0.423935	39531_at	down
TUBA4A	tubulin, alpha 4a	TUBA4A	0.0186178			TUBA4A	0.0186178	0.09147	-0.653153	0.635889	330_s_at	down
CLTB	clathrin, light chain (Lcb)	CLTB	0.0010551			CLTB	0.0010551	0.01959	-0.578044	0.669872	32523_at	down
MAP2	microtubule-associated protein 2	MAP2	0.0003213			MAP2	0.0003213	0.00748866	-1.01267	0.495627	183_at	down
MEGF8	multiple EGF-like-domains 8	MEGF8	0.0001152			MEGF8	0.0001152	0.00629	-0.809208	0.570695	35394_at	down
GO:0003682	chromatin binding	F	0.00392677	4/82	1
TOP2B	topoisomerase (DNA) II beta 180kDa	TOP2B	0.0031918			TOP2B	0.0031918	0.03417	-0.575788	0.67092	1581_s_at	down
ACTL6A	actin-like 6A	ACTL6A	0.0046062			ACTL6A	0.0046062	0.04183	0.649623	1.56876	41278_at	up
RAN	RAN, member RAS oncogene family	RAN	0.0040426			RAN	0.0040426	0.0363477	-0.578398	0.669707	1839_at	down
KLHDC3	kelch domain containing 3	KLHDC3	4.49e-05			KLHDC3	4.49e-05	0.00505	-1.08427	0.47163	39537_at	down
GO:0005525	GTP binding	F	0.00398733	7/199	1
RAP2A	RAP2A, member of RAS oncogene family	RAP2A	0.0003335			RAP2A	0.0003335	0.01041	-1.32505	0.399135	41317_at	down
GNAQ	guanine nucleotide binding protein (G protein), q polypeptide	GNAQ	0.0003599			GNAQ	0.0003599	0.01087	-0.754566	0.592725	38580_at	down
TUBA4A	tubulin, alpha 4a	TUBA4A	0.0186178			TUBA4A	0.0186178	0.09147	-0.653153	0.635889	330_s_at	down
RAB5A	RAB5A, member RAS oncogene family	RAB5A	0.002247			RAB5A	0.002247	0.02918	-0.672972	0.627213	600_at	down
SEPT10	septin 10	SEPT10	0.0026841			SEPT10	0.0026841	0.03115	0.657963	1.57785	38033_at	up
RAN	RAN, member RAS oncogene family	RAN	0.0040426			RAN	0.0040426	0.0363477	-0.578398	0.669707	1839_at	down
RAB6A	RAB6A, member RAS oncogene family	RAB6A	0.0001043			RAB6A	0.0001043	0.00605	-1.15041	0.450496	622_at	down
GO:0007268	synaptic transmission	P	0.00433404	5/120	1
HTR2A	5-hydroxytryptamine (serotonin) receptor 2A	HTR2A	0.0084752			HTR2A	0.0084752	0.049011	-0.711074	0.610865	35469_at	down
DLGAP1	discs, large (Drosophila) homolog-associated protein 1	DLGAP1	0.0021466			DLGAP1	0.0021466	0.02878	-0.633301	0.6447	40388_at	down
CRH	corticotropin releasing hormone	CRH	0.0017084			CRH	0.0017084	0.02538	-0.86641	0.54851	40382_at	down
SYN2	synapsin II	SYN2	3.08e-05			SYN2	3.08e-05	0.00424	-1.04519	0.484579	36748_at	down
SST	somatostatin	SST	0.0001518			SST	0.0001518	0.00714	-1.10261	0.465674	37782_at	down
GO:0003779	actin binding	F	0.00456056	6/161	1
MAP1B	microtubule-associated protein 1B	MAP1B	2.11e-05			MAP1B	2.11e-05	0.00356	-1.23808	0.423935	39531_at	down
CAP2	CAP, adenylate cyclase-associated protein, 2 (yeast)	CAP2	0.0081816			CAP2	0.0081816	0.0451738	-0.751968	0.593793	693_g_at	down
RDX	radixin	RDX	1.9e-06			RDX	1.9e-06	0.00178	0.64221	1.56072	34887_at	up
PALLD	palladin, cytoskeletal associated protein	PALLD	0.0004577			PALLD	0.0004577	0.01269	0.688077	1.61113	41191_at	up
MYO10	myosin X	MYO10	0.0001896			MYO10	0.0001896	0.00783	0.804546	1.7466	35362_at	up
PDLIM5	PDZ and LIM domain 5	PDLIM5	0.0009779			PDLIM5	0.0009779	0.0168039	0.69795	1.6222	37366_at	up
GO:0031410	cytoplasmic vesicle	C	0.0048877	5/123	1
SCAMP5	secretory carrier membrane protein 5	SCAMP5	0.0048192			SCAMP5	0.0048192	0.04303	-0.684989	0.622011	37546_r_at	down
CLTB	clathrin, light chain (Lcb)	CLTB	0.0010551			CLTB	0.0010551	0.01959	-0.578044	0.669872	32523_at	down
KIF1B	kinesin family member 1B	KIF1B	0.0001724			KIF1B	0.0001724	0.00753	-0.824181	0.564803	34924_at	down
CLIC4	chloride intracellular channel 4	CLIC4	0.0007084			CLIC4	0.0007084	0.01576	0.798569	1.73938	33891_at	up
PIK3C2A	phosphoinositide-3-kinase, class 2, alpha polypeptide	PIK3C2A	0.0001203			PIK3C2A	0.0001203	0.00647	0.582522	1.49746	36509_at	up
GO:0005794	Golgi apparatus	C	0.00539906	12/454	1
PDE4DIP	phosphodiesterase 4D interacting protein	PDE4DIP	8e-05			PDE4DIP	8e-05	0.00573	0.821173	1.76684	36092_at	up
SCAMP5	secretory carrier membrane protein 5	SCAMP5	0.0048192			SCAMP5	0.0048192	0.04303	-0.684989	0.622011	37546_r_at	down
SRGN	serglycin	SRGN	0.0110681			SRGN	0.0110681	0.0684	0.863611	1.81959	32227_at	up
PAK1	p21 protein (Cdc42/Rac)-activated kinase 1	PAK1	2.05e-05			PAK1	2.05e-05	0.00363	-1.36292	0.388794	1558_g_at	down
MAN1A1	mannosidase, alpha, class 1A, member 1	MAN1A1	0.0023499			MAN1A1	0.0023499	0.02989	-0.723092	0.605798	39613_at	down
GJA1	gap junction protein, alpha 1, 43kDa	GJA1	0.003181			GJA1	0.003181	0.03415	0.605087	1.52107	32531_at	up
TGOLN2	trans-golgi network protein 2	TGOLN2	0.0037269			TGOLN2	0.0037269	0.03691	-0.623205	0.649227	31827_s_at	down
PITPNB	phosphatidylinositol transfer protein, beta	PITPNB	6.72e-05			PITPNB	6.72e-05	0.0052	-0.649397	0.637547	353_at	down
NAPG	N-ethylmaleimide-sensitive factor attachment protein, gamma	NAPG	0.0001538			NAPG	0.0001538	0.00714	-0.761177	0.590015	40289_at	down
LITAF	lipopolysaccharide-induced TNF factor	LITAF	0.0121081			LITAF	0.0121081	0.07161	0.864586	1.82082	37024_at	up
RAB6A	RAB6A, member RAS oncogene family	RAB6A	0.0001043			RAB6A	0.0001043	0.00605	-1.15041	0.450496	622_at	down
PIK3C2A	phosphoinositide-3-kinase, class 2, alpha polypeptide	PIK3C2A	0.0001203			PIK3C2A	0.0001203	0.00647	0.582522	1.49746	36509_at	up
GO:0016740	transferase activity	F	0.00612108	16/681	1
CAMK2A	calcium/calmodulin-dependent protein kinase II alpha	CAMK2A	0.0030407			CAMK2A	0.0030407	0.03322	-0.693331	0.618424	31813_at	down
PAK1	p21 protein (Cdc42/Rac)-activated kinase 1	PAK1	2.05e-05			PAK1	2.05e-05	0.00363	-1.36292	0.388794	1558_g_at	down
ITPKB	inositol 1,4,5-trisphosphate 3-kinase B	ITPKB	0.0001007			ITPKB	0.0001007	0.00603	0.739727	1.66986	37272_at	up
WNK1	WNK lysine deficient protein kinase 1	WNK1	2.71e-05			WNK1	2.71e-05	0.00437	0.651698	1.57102	32185_at	up
PRKCZ	protein kinase C, zeta	PRKCZ	0.0016128			PRKCZ	0.0016128	0.02455	-0.59451	0.66227	362_at	down
ITPKA	inositol 1,4,5-trisphosphate 3-kinase A	ITPKA	5.21e-05			ITPKA	5.21e-05	0.00509	-0.850905	0.554437	118_at	down
FGFR3	fibroblast growth factor receptor 3	FGFR3	0.0003844			FGFR3	0.0003844	0.01142	0.632415	1.55016	31805_at	up
PRKCB	protein kinase C, beta	PRKCB	0.005086			PRKCB	0.005086	0.0379278	-1.11601	0.461367	1217_g_at	down
MAPK9	mitogen-activated protein kinase 9	MAPK9	0.0021075			MAPK9	0.0021075	0.0267768	-0.615782	0.652576	1238_at	down
PAK3	p21 protein (Cdc42/Rac)-activated kinase 3	PAK3	0.002674			PAK3	0.002674	0.03133	-0.712977	0.61006	33074_g_at	down
METTL7A	methyltransferase like 7A	METTL7A	0.0004606			METTL7A	0.0004606	0.01249	0.649545	1.56867	38717_at	up
PIP4K2A	phosphatidylinositol-5-phosphate 4-kinase, type II, alpha	PIP4K2A	0.0007009			PIP4K2A	0.0007009	0.01578	0.696632	1.62072	35310_at	up
PCMT1	protein-L-isoaspartate (D-aspartate) O-methyltransferase	PCMT1	0.0001396			PCMT1	0.0001396	0.00682	-1.18913	0.438568	37738_g_at	down
PIK3C2A	phosphoinositide-3-kinase, class 2, alpha polypeptide	PIK3C2A	0.0001203			PIK3C2A	0.0001203	0.00647	0.582522	1.49746	36509_at	up
NEK7	NIMA (never in mitosis gene a)-related kinase 7	NEK7	0.0008225			NEK7	0.0008225	0.01679	0.636828	1.55491	34752_at	up
ERBB3	v-erb-b2 erythroblastic leukemia viral oncogene homolog 3 (avian)	ERBB3	0.0007473			ERBB3	0.0007473	0.01595	0.583372	1.49835	1585_at	up
GO:0006915	apoptosis	P	0.00666288	7/217	1
SRGN	serglycin	SRGN	0.0110681			SRGN	0.0110681	0.0684	0.863611	1.81959	32227_at	up
PAK1	p21 protein (Cdc42/Rac)-activated kinase 1	PAK1	2.05e-05			PAK1	2.05e-05	0.00363	-1.36292	0.388794	1558_g_at	down
FGF2	fibroblast growth factor 2 (basic)	FGF2	0.0094126			FGF2	0.0094126	0.06199	0.609138	1.52535	1593_at	up
DDIT4	DNA-damage-inducible transcript 4	DDIT4	0.001298			DDIT4	0.001298	0.02133	0.912218	1.88194	39827_at	up
GJA1	gap junction protein, alpha 1, 43kDa	GJA1	0.003181			GJA1	0.003181	0.03415	0.605087	1.52107	32531_at	up
LITAF	lipopolysaccharide-induced TNF factor	LITAF	0.0121081			LITAF	0.0121081	0.07161	0.864586	1.82082	37024_at	up
MEF2C	myocyte enhancer factor 2C	MEF2C	9.2e-06			MEF2C	9.2e-06	0.00245	-0.948197	0.51828	37712_g_at	down
GO:0005578	proteinaceous extracellular matrix	C	0.00686122	5/132	1
VCAN	versican	VCAN	0.0005119			VCAN	0.0005119	0.0130669	0.695197	1.61911	38111_at	up
SPON1	spondin 1, extracellular matrix protein	SPON1	6.14e-05			SPON1	6.14e-05	0.0057	0.743956	1.67476	35277_at	up
FGF1	fibroblast growth factor 1 (acidic)	FGF1	6.42e-05			FGF1	6.42e-05	0.00542	0.84278	1.7935	996_at	up
VWF	von Willebrand factor	VWF	0.0030032			VWF	0.0030032	0.0332	0.703575	1.62854	607_s_at	up
EFEMP1	EGF-containing fibulin-like extracellular matrix protein 1	EFEMP1	0.0016776			EFEMP1	0.0016776	0.02523	0.930865	1.90642	32551_at	up
GO:0007264	small GTPase mediated signal transduction	P	0.00979081	4/102	1
RIN2	Ras and Rab interactor 2	RIN2	4.32e-05			RIN2	4.32e-05	0.00518	0.614963	1.53152	36550_at	up
RAP2A	RAP2A, member of RAS oncogene family	RAP2A	0.0003335			RAP2A	0.0003335	0.01041	-1.32505	0.399135	41317_at	down
RAB5A	RAB5A, member RAS oncogene family	RAB5A	0.002247			RAB5A	0.002247	0.02918	-0.672972	0.627213	600_at	down
RAB6A	RAB6A, member RAS oncogene family	RAB6A	0.0001043			RAB6A	0.0001043	0.00605	-1.15041	0.450496	622_at	down
GO:0008285	negative regulation of cell proliferation	P	0.0100863	6/187	1
TAX1BP3	Tax1 (human T-cell leukemia virus type I) binding protein 3	TAX1BP3	0.0005354			TAX1BP3	0.0005354	0.01344	0.653897	1.57341	39416_at	up
FGF2	fibroblast growth factor 2 (basic)	FGF2	0.0094126			FGF2	0.0094126	0.06199	0.609138	1.52535	1593_at	up
IFITM1	interferon induced transmembrane protein 1 (9-27)	IFITM1	0.017489			IFITM1	0.017489	0.0879	0.796211	1.73653	675_at	up
GJA1	gap junction protein, alpha 1, 43kDa	GJA1	0.003181			GJA1	0.003181	0.03415	0.605087	1.52107	32531_at	up
RBBP4	retinoblastoma binding protein 4	RBBP4	0.0010295			RBBP4	0.0010295	0.01961	-0.591505	0.66365	1318_at	down
SST	somatostatin	SST	0.0001518			SST	0.0001518	0.00714	-1.10261	0.465674	37782_at	down
GO:0005813	centrosome	C	0.0114417	4/106	1
PDE4DIP	phosphodiesterase 4D interacting protein	PDE4DIP	8e-05			PDE4DIP	8e-05	0.00573	0.821173	1.76684	36092_at	up
CALM3	calmodulin 3 (phosphorylase kinase, delta)	CALM3	6.16e-05			CALM3	6.16e-05	0.00558	-1.49915	0.353761	41144_g_at	down
PDE4D	phosphodiesterase 4D, cAMP-specific (phosphodiesterase E3 dunce homolog, Drosophila)	PDE4D	0.0002783			PDE4D	0.0002783	0.00931	-0.62678	0.64762	38526_at	down
LITAF	lipopolysaccharide-induced TNF factor	LITAF	0.0121081			LITAF	0.0121081	0.07161	0.864586	1.82082	37024_at	up
GO:0016192	vesicle-mediated transport	P	0.0132729	4/110	1
CLTB	clathrin, light chain (Lcb)	CLTB	0.0010551			CLTB	0.0010551	0.01959	-0.578044	0.669872	32523_at	down
CPNE3	copine III	CPNE3	0.0208618			CPNE3	0.0208618	0.09735	0.601429	1.51722	39706_at	up
NAPG	N-ethylmaleimide-sensitive factor attachment protein, gamma	NAPG	0.0001538			NAPG	0.0001538	0.00714	-0.761177	0.590015	40289_at	down
RAB6A	RAB6A, member RAS oncogene family	RAB6A	0.0001043			RAB6A	0.0001043	0.00605	-1.15041	0.450496	622_at	down
GO:0005615	extracellular space	C	0.0151886	10/407	1
F3	coagulation factor III (thromboplastin, tissue factor)	F3	0.0078725			F3	0.0078725	0.05645	0.705182	1.63035	36543_at	up
SRGN	serglycin	SRGN	0.0110681			SRGN	0.0110681	0.0684	0.863611	1.81959	32227_at	up
FGF2	fibroblast growth factor 2 (basic)	FGF2	0.0094126			FGF2	0.0094126	0.06199	0.609138	1.52535	1593_at	up
APOD	apolipoprotein D	APOD	1.79e-05			APOD	1.79e-05	0.00332	0.763591	1.69771	36681_at	up
FGF1	fibroblast growth factor 1 (acidic)	FGF1	6.42e-05			FGF1	6.42e-05	0.00542	0.84278	1.7935	996_at	up
SEPP1	selenoprotein P, plasma, 1	SEPP1	0.0004249			SEPP1	0.0004249	0.01196	0.632364	1.5501	34363_at	up
SPP1	secreted phosphoprotein 1	SPP1	0.0143736			SPP1	0.0143736	0.0782568	1.07551	2.10747	2092_s_at	up
FGF12	fibroblast growth factor 12	FGF12	6.26e-05			FGF12	6.26e-05	0.00541	-0.846144	0.556269	41673_at	down
ERBB3	v-erb-b2 erythroblastic leukemia viral oncogene homolog 3 (avian)	ERBB3	0.0007473			ERBB3	0.0007473	0.01595	0.583372	1.49835	1585_at	up
SST	somatostatin	SST	0.0001518			SST	0.0001518	0.00714	-1.10261	0.465674	37782_at	down
GO:0007399	nervous system development	P	0.0160626	6/205	1
FGF2	fibroblast growth factor 2 (basic)	FGF2	0.0094126			FGF2	0.0094126	0.06199	0.609138	1.52535	1593_at	up
DPYSL3	dihydropyrimidinase-like 3	DPYSL3	7.82e-05			DPYSL3	7.82e-05	0.00559	0.590194	1.50545	36149_at	up
FGF12	fibroblast growth factor 12	FGF12	6.26e-05			FGF12	6.26e-05	0.00541	-0.846144	0.556269	41673_at	down
ZEB2	zinc finger E-box binding homeobox 2	ZEB2	0.002671			ZEB2	0.002671	0.0314	0.663024	1.5834	35681_r_at	up
AHNAK	AHNAK nucleoprotein	AHNAK	0.0001346			AHNAK	0.0001346	0.00685	0.672399	1.59372	37027_at	up
MEF2C	myocyte enhancer factor 2C	MEF2C	9.2e-06			MEF2C	9.2e-06	0.00245	-0.948197	0.51828	37712_g_at	down
GO:0045211	postsynaptic membrane	C	0.0175212	3/78	1
GABRB3	gamma-aminobutyric acid (GABA) A receptor, beta 3	GABRB3	3e-07			GABRB3	3e-07	0.00119	-1.10424	0.465146	31817_at	down
GRIN2A	glutamate receptor, ionotropic, N-methyl D-aspartate 2A	GRIN2A	4.6e-06			GRIN2A	4.6e-06	0.00243	-0.900695	0.535629	38236_at	down
DLGAP1	discs, large (Drosophila) homolog-associated protein 1	DLGAP1	0.0021466			DLGAP1	0.0021466	0.02878	-0.633301	0.6447	40388_at	down
GO:0005244	voltage-gated ion channel activity	F	0.0175212	3/78	1
KCNAB1	potassium voltage-gated channel, shaker-related subfamily, beta member 1	KCNAB1	0.0019864			KCNAB1	0.0019864	0.02733	-1.19657	0.43631	32711_g_at	down
CLIC4	chloride intracellular channel 4	CLIC4	0.0007084			CLIC4	0.0007084	0.01576	0.798569	1.73938	33891_at	up
CACNB2	calcium channel, voltage-dependent, beta 2 subunit	CACNB2	5e-06			CACNB2	5e-06	0.00205	-0.628089	0.647033	39647_s_at	down
GO:0004674	protein serine/threonine kinase activity	F	0.0185201	6/211	1
PAK1	p21 protein (Cdc42/Rac)-activated kinase 1	PAK1	2.05e-05			PAK1	2.05e-05	0.00363	-1.36292	0.388794	1558_g_at	down
WNK1	WNK lysine deficient protein kinase 1	WNK1	2.71e-05			WNK1	2.71e-05	0.00437	0.651698	1.57102	32185_at	up
CPNE3	copine III	CPNE3	0.0208618			CPNE3	0.0208618	0.09735	0.601429	1.51722	39706_at	up
MAPK9	mitogen-activated protein kinase 9	MAPK9	0.0021075			MAPK9	0.0021075	0.0267768	-0.615782	0.652576	1238_at	down
PAK3	p21 protein (Cdc42/Rac)-activated kinase 3	PAK3	0.002674			PAK3	0.002674	0.03133	-0.712977	0.61006	33074_g_at	down
NEK7	NIMA (never in mitosis gene a)-related kinase 7	NEK7	0.0008225			NEK7	0.0008225	0.01679	0.636828	1.55491	34752_at	up
GO:0006886	intracellular protein transport	P	0.0199275	4/122	1
CLTB	clathrin, light chain (Lcb)	CLTB	0.0010551			CLTB	0.0010551	0.01959	-0.578044	0.669872	32523_at	down
RAMP1	receptor (G protein-coupled) activity modifying protein 1	RAMP1	8.83e-05			RAMP1	8.83e-05	0.00566	0.618733	1.53553	35668_at	up
NAPG	N-ethylmaleimide-sensitive factor attachment protein, gamma	NAPG	0.0001538			NAPG	0.0001538	0.00714	-0.761177	0.590015	40289_at	down
RAN	RAN, member RAS oncogene family	RAN	0.0040426			RAN	0.0040426	0.0363477	-0.578398	0.669707	1839_at	down
GO:0006916	anti-apoptosis	P	0.0212153	4/124	1
CRYAB	crystallin, alpha B	CRYAB	0.0021194			CRYAB	0.0021194	0.0238509	0.685433	1.60818	32242_at	up
F3	coagulation factor III (thromboplastin, tissue factor)	F3	0.0078725			F3	0.0078725	0.05645	0.705182	1.63035	36543_at	up
PRKCZ	protein kinase C, zeta	PRKCZ	0.0016128			PRKCZ	0.0016128	0.02455	-0.59451	0.66227	362_at	down
YWHAZ	tyrosine 3-monooxygenase/tryptophan 5-monooxygenase activation protein, zeta polypeptide	YWHAZ	0.0001042			YWHAZ	0.0001042	0.00614	-1.30208	0.405542	34642_at	down
GO:0005625	soluble fraction	C	0.0222977	5/171	1
CRYAB	crystallin, alpha B	CRYAB	0.0021194			CRYAB	0.0021194	0.0238509	0.685433	1.60818	32242_at	up
PDE4D	phosphodiesterase 4D, cAMP-specific (phosphodiesterase E3 dunce homolog, Drosophila)	PDE4D	0.0002783			PDE4D	0.0002783	0.00931	-0.62678	0.64762	38526_at	down
CRH	corticotropin releasing hormone	CRH	0.0017084			CRH	0.0017084	0.02538	-0.86641	0.54851	40382_at	down
CLIC4	chloride intracellular channel 4	CLIC4	0.0007084			CLIC4	0.0007084	0.01576	0.798569	1.73938	33891_at	up
TPPP	tubulin polymerization promoting protein	TPPP	0.0030667			TPPP	0.0030667	0.0334	-0.583988	0.667117	37465_at	down
GO:0006811	ion transport	P	0.0228698	7/271	1
GABRB3	gamma-aminobutyric acid (GABA) A receptor, beta 3	GABRB3	3e-07			GABRB3	3e-07	0.00119	-1.10424	0.465146	31817_at	down
KCNAB1	potassium voltage-gated channel, shaker-related subfamily, beta member 1	KCNAB1	0.0019864			KCNAB1	0.0019864	0.02733	-1.19657	0.43631	32711_g_at	down
WNK1	WNK lysine deficient protein kinase 1	WNK1	2.71e-05			WNK1	2.71e-05	0.00437	0.651698	1.57102	32185_at	up
ATP5A1	ATP synthase, H+ transporting, mitochondrial F1 complex, alpha subunit 1, cardiac muscle	ATP5A1	0.0027468			ATP5A1	0.0027468	0.03159	-0.946218	0.518991	40096_at	down
GRIN2A	glutamate receptor, ionotropic, N-methyl D-aspartate 2A	GRIN2A	4.6e-06			GRIN2A	4.6e-06	0.00243	-0.900695	0.535629	38236_at	down
CLIC4	chloride intracellular channel 4	CLIC4	0.0007084			CLIC4	0.0007084	0.01576	0.798569	1.73938	33891_at	up
CACNB2	calcium channel, voltage-dependent, beta 2 subunit	CACNB2	5e-06			CACNB2	5e-06	0.00205	-0.628089	0.647033	39647_s_at	down
GO:0006928	cellular component movement	P	0.0241378	3/86	1
ENPP2	ectonucleotide pyrophosphatase/phosphodiesterase 2	ENPP2	0.0072419			ENPP2	0.0072419	0.0536232	0.680149	1.60231	41123_s_at	up
VIM	vimentin	VIM	0.0011799			VIM	0.0011799	0.02038	0.633233	1.55104	34091_s_at	up
ABI2	abl-interactor 2	ABI2	4.99e-05			ABI2	4.99e-05	0.00501	-1.1962	0.436423	36448_at	down
GO:0005096	GTPase activator activity	F	0.025998	3/88	1
RIN2	Ras and Rab interactor 2	RIN2	4.32e-05			RIN2	4.32e-05	0.00518	0.614963	1.53152	36550_at	up
RGS4	regulator of G-protein signaling 4	RGS4	0.0089282			RGS4	0.0089282	0.0545706	-0.827816	0.563381	34272_at	down
RGS20	regulator of G-protein signaling 20	RGS20	0.0051704			RGS20	0.0051704	0.04466	0.768938	1.70402	41086_at	up
GO:0006457	protein folding	P	0.0289461	3/91	1
CRYAB	crystallin, alpha B	CRYAB	0.0021194			CRYAB	0.0021194	0.0238509	0.685433	1.60818	32242_at	up
DNAJB4	DnaJ (Hsp40) homolog, subfamily B, member 4	DNAJB4	0.0013721			DNAJB4	0.0013721	0.02216	-0.649588	0.637463	158_at	down
HSP90AB1	heat shock protein 90kDa alpha (cytosolic), class B member 1	HSP90AB1	0.0010452			HSP90AB1	0.0010452	0.01961	-0.809161	0.570714	33986_r_at	down
GO:0016887	ATPase activity	F	0.0299711	3/92	1
ATP5A1	ATP synthase, H+ transporting, mitochondrial F1 complex, alpha subunit 1, cardiac muscle	ATP5A1	0.0027468			ATP5A1	0.0027468	0.03159	-0.946218	0.518991	40096_at	down
RHOBTB3	Rho-related BTB domain containing 3	RHOBTB3	0.0030889			RHOBTB3	0.0030889	0.0258272	0.918569	1.89024	32215_i_at	up
KIF1B	kinesin family member 1B	KIF1B	0.0001724			KIF1B	0.0001724	0.00753	-0.824181	0.564803	34924_at	down
GO:0008083	growth factor activity	F	0.0310174	3/93	1
FGF2	fibroblast growth factor 2 (basic)	FGF2	0.0094126			FGF2	0.0094126	0.06199	0.609138	1.52535	1593_at	up
FGF1	fibroblast growth factor 1 (acidic)	FGF1	6.42e-05			FGF1	6.42e-05	0.00542	0.84278	1.7935	996_at	up
FGF12	fibroblast growth factor 12	FGF12	6.26e-05			FGF12	6.26e-05	0.00541	-0.846144	0.556269	41673_at	down
GO:0005624	membrane fraction	C	0.0410262	7/304	1
CNTN1	contactin 1	CNTN1	0.000336			CNTN1	0.000336	0.0104	-0.932737	0.523864	31809_at	down
GNAQ	guanine nucleotide binding protein (G protein), q polypeptide	GNAQ	0.0003599			GNAQ	0.0003599	0.01087	-0.754566	0.592725	38580_at	down
MAN1A1	mannosidase, alpha, class 1A, member 1	MAN1A1	0.0023499			MAN1A1	0.0023499	0.02989	-0.723092	0.605798	39613_at	down
PRKCZ	protein kinase C, zeta	PRKCZ	0.0016128			PRKCZ	0.0016128	0.02455	-0.59451	0.66227	362_at	down
LAMP2	lysosomal-associated membrane protein 2	LAMP2	7.26e-05			LAMP2	7.26e-05	0.0053884	0.864183	1.82031	38402_at	up
NAPG	N-ethylmaleimide-sensitive factor attachment protein, gamma	NAPG	0.0001538			NAPG	0.0001538	0.00714	-0.761177	0.590015	40289_at	down
PDLIM5	PDZ and LIM domain 5	PDLIM5	0.0009779			PDLIM5	0.0009779	0.0168039	0.69795	1.6222	37366_at	up
GO:0003676	nucleic acid binding	F	0.0439424	3/104	1
ENPP2	ectonucleotide pyrophosphatase/phosphodiesterase 2	ENPP2	0.0072419			ENPP2	0.0072419	0.0536232	0.680149	1.60231	41123_s_at	up
ZCCHC24	zinc finger, CCHC domain containing 24	ZCCHC24	4.86e-05			ZCCHC24	4.86e-05	0.00501	0.708956	1.63462	34303_at	up
BCL11A	B-cell CLL/lymphoma 11A (zinc finger protein)	BCL11A	1.06e-05			BCL11A	1.06e-05	0.00245	-0.945066	0.519406	41356_at	down
GO:0005764	lysosome	C	0.0479194	3/107	1
GJA1	gap junction protein, alpha 1, 43kDa	GJA1	0.003181			GJA1	0.003181	0.03415	0.605087	1.52107	32531_at	up
LITAF	lipopolysaccharide-induced TNF factor	LITAF	0.0121081			LITAF	0.0121081	0.07161	0.864586	1.82082	37024_at	up
NPC2	Niemann-Pick disease, type C2	NPC2	0.0030755			NPC2	0.0030755	0.0334	0.602022	1.51784	39345_at	up

## Sheet: Cellular_Location
Functional analysis of DEGs in nervous tissue with "Stranger" based on Cellular Location of GO tree
Cellular_Location	Enrichment	Cellular_Location (Enrichment)	Enrichment	%Enrichment	OT p-value/Gene p-value	#up_old_vs_young	#down_old_vs_young
plasma membrane	45/1406	plasma membrane (45/1406)	0.0320057	3.20057	8.975e-10	21	24
cytoplasm	56/2430	cytoplasm (56/2430)	0.0230453	2.30453	9.41807e-07	25	31
cytoskeleton	13/271	cytoskeleton (13/271)	0.0479705	4.79705	9.50206e-06	5	8
microtubule	6/114	microtubule (6/114)	0.0526316	5.26316	0.000632299	0	6
cell junction	8/210	cell junction (8/210)	0.0380952	3.80952	0.0014824	1	7
synapse	6/141	synapse (6/141)	0.0425532	4.25532	0.00218271	0	6
melanosome	4/73	melanosome (4/73)	0.0547945	5.47945	0.00236869	0	4
cytoplasmic vesicle	5/123	cytoplasmic vesicle (5/123)	0.0406504	4.06504	0.0048877	2	3
Golgi apparatus	12/454	Golgi apparatus (12/454)	0.0264317	2.64317	0.00539906	5	7
proteinaceous extracellular matrix	5/132	proteinaceous extracellular matrix (5/132)	0.0378788	3.78788	0.00686122	5	0
centrosome	4/106	centrosome (4/106)	0.0377358	3.77358	0.0114417	2	2
extracellular space	10/407	extracellular space (10/407)	0.02457	2.457	0.0151886	8	2
postsynaptic membrane	3/78	postsynaptic membrane (3/78)	0.0384615	3.84615	0.0175212	0	3
soluble fraction	5/171	soluble fraction (5/171)	0.0292398	2.92398	0.0222977	2	3
membrane fraction	7/304	membrane fraction (7/304)	0.0230263	2.30263	0.0410262	2	5
lysosome	3/107	lysosome (3/107)	0.0280374	2.80374	0.0479194	3	0

## Sheet: Functions
Functional analysis of DEGs in nervous tissue with "Stranger" based on Function of GO tree
Function	Enrichment	Function (Enrichment)	Enrichment	%Enrichment	OT p-value/Gene p-value	Enrichment	#up_old_vs_young	#down_old_vs_young
protein binding	73/3260	protein binding (73/3260)	0.0223926	2.23926	2.30637e-08	73/3260	35	38
ATP binding	27/931	ATP binding (27/931)	0.0290011	2.90011	1.66835e-05	27/931	11	16
signal transducer activity	10/184	signal transducer activity (10/184)	0.0543478	5.43478	2.33666e-05	10/184	5	5
GTPase activity	8/125	GTPase activity (8/125)	0.064	6.4	3.08598e-05	8/125	1	7
nucleotide binding	31/1220	nucleotide binding (31/1220)	0.0254098	2.54098	5.86849e-05	31/1220	10	21
calmodulin binding	6/101	calmodulin binding (6/101)	0.0594059	5.94059	0.000303379	6/101	1	5
calcium ion binding	14/519	calcium ion binding (14/519)	0.026975	2.6975	0.00261395	14/519	3	11
unfolded protein binding	4/77	unfolded protein binding (4/77)	0.0519481	5.19481	0.00299157	4/77	2	2
structural molecule activity	5/113	structural molecule activity (5/113)	0.0442478	4.42478	0.00322352	5/113	0	5
chromatin binding	4/82	chromatin binding (4/82)	0.0487805	4.87805	0.00392677	4/82	1	3
GTP binding	7/199	GTP binding (7/199)	0.0351759	3.51759	0.00398733	7/199	1	6
actin binding	6/161	actin binding (6/161)	0.0372671	3.72671	0.00456056	6/161	4	2
transferase activity	16/681	transferase activity (16/681)	0.0234949	2.34949	0.00612108	16/681	8	8
voltage-gated ion channel activity	3/78	voltage-gated ion channel activity (3/78)	0.0384615	3.84615	0.0175212	3/78	1	2
protein serine/threonine kinase activity	6/211	protein serine/threonine kinase activity (6/211)	0.028436	2.8436	0.0185201	6/211	3	3
GTPase activator activity	3/88	GTPase activator activity (3/88)	0.0340909	3.40909	0.025998	3/88	2	1
ATPase activity	3/92	ATPase activity (3/92)	0.0326087	3.26087	0.0299711	3/92	1	2
growth factor activity	3/93	growth factor activity (3/93)	0.0322581	3.22581	0.0310174	3/93	2	1
nucleic acid binding	3/104	nucleic acid binding (3/104)	0.0288462	2.88462	0.0439424	3/104	2	1

## Sheet: Biological_Processes
Functional analysis of DEGs in nervous tissue with "Stranger" based on Biological Process of GO tree
Biological_Process	Enrichment	Biological_Process (Enrichment)	Enrichment	%Enrichment	OT p-value/Gene p-value	Enrichment	#up	#down
signal transduction	26/928	signal transduction (26/928)	0.0280172	2.80172	4.31589e-05	26/928	11	15
G-protein coupled receptor protein signaling pathway	8/216	G-protein coupled receptor protein signaling pathway (8/216)	0.037037	3.7037	0.00179954	8/216	4	4
synaptic transmission	5/120	synaptic transmission (5/120)	0.0416667	4.16667	0.00433404	5/120	0	5
apoptosis	7/217	apoptosis (7/217)	0.0322581	3.22581	0.00666288	7/217	5	2
small GTPase mediated signal transduction	4/102	small GTPase mediated signal transduction (4/102)	0.0392157	3.92157	0.00979081	4/102	1	3
negative regulation of cell proliferation	6/187	negative regulation of cell proliferation (6/187)	0.0320856	3.20856	0.0100863	6/187	4	2
vesicle-mediated transport	4/110	vesicle-mediated transport (4/110)	0.0363636	3.63636	0.0132729	4/110	1	3
nervous system development	6/205	nervous system development (6/205)	0.0292683	2.92683	0.0160626	6/205	4	2
intracellular protein transport	4/122	intracellular protein transport (4/122)	0.0327869	3.27869	0.0199275	4/122	1	3
anti-apoptosis	4/124	anti-apoptosis (4/124)	0.0322581	3.22581	0.0212153	4/124	2	2
ion transport	7/271	ion transport (7/271)	0.0258303	2.58303	0.0228698	7/271	2	5
cellular component movement	3/86	cellular component movement (3/86)	0.0348837	3.48837	0.0241378	3/86	2	1
protein folding	3/91	protein folding (3/91)	0.032967	3.2967	0.0289461	3/91	1	2

## Sheet: DEGs_for_F&BP
List of DEGs enriched in Functions and Biological Processes found to be overepresented in nervous tissue transcriptomics data
GO Term/Gene Name	GO Annotation/Gene Description	GO Category/GeneID
GO:0005515	protein binding	F	SCAMP5	MT1G	RIN2	GNB5	RAP2A	ZHX2	AZIN1	CHGB	CNTN1	MAP1B	GNAQ	SRGN	LRIG1	NUTF2	FGF2	TUBA4A	CLTB	TSPYL2	PLEKHB2	APOD	WNK1	RASSF2	FRMPD4	WWTR1	IFITM1	ATP5A1	GRIN2A	RGS20	ANK2	SPON1	NRXN1	MRPS12	CALB1	VIM	DDX3X	GJA1	DLGAP1	PLOD2	TGOLN2	RHOBTB3	ACTL6A	PRKCB	FGF1	BCAS1	KIF1B	RAB5A	PALLD
GO:0005524	ATP binding	F	TOP2B	CAMK2A	PAK1	ITPKB	WNK1	ATP5A1	ATP2B2	PRKCZ	DDX3X	ITPKA	FGFR3	HSP90AB1	HSPA2	RHOBTB3	ACTL6A	PRKCB	KIF1B	MYO10	MAPK9	PAK3	PIP4K2A	ACTA1	SMARCA2	SYN2	PIK3C2A	NEK7	ERBB3
GO:0004871	signal transducer activity	F	GNB5	GNAQ	RGS4	RGS20	GJA1	GNG12	FKBP1A	STAT1	LITAF	GNG11
GO:0003924	GTPase activity	F	GNB5	RAP2A	GNAQ	TUBA4A	RAB5A	RAN	GNG11	RAB6A
GO:0007165	signal transduction	P	RIN2	GABRB3	GNB5	RAP2A	PDE4D	HTR2A	GNAQ	CAP2	ITPKB	FGF2	RASSF2	ANK2	ITPKA	GNG12	ACTL6A	FGF1	CRH	STAT1	MYO10	DPYSL3	RAN	FGF12	GNG11	S1PR1	INPP4A	YWHAZ
GO:0000166	nucleotide binding	F	TOP2B	RAP2A	GNAQ	CAMK2A	PAK1	ITPKB	TUBA4A	WNK1	ATP5A1	ATP2B2	PRKCZ	DDX3X	ITPKA	FGFR3	HSP90AB1	HSPA2	PRKCB	KIF1B	RAB5A	SEPT10	MYO10	RAN	MAPK9	PAK3	PIP4K2A	ACTA1	RAB6A	SMARCA2	PIK3C2A	NEK7	ERBB3
GO:0005516	calmodulin binding	F	CAMK2A	ITPKB	RGS4	ATP2B2	ITPKA	MAP2
GO:0007186	G-protein coupled receptor protein signaling pathway	P	CALM3	GNB5	GNAQ	ENPP2	GNG12	GNG11	S1PR1	SST
GO:0005509	calcium ion binding	F	CALM3	VCAN	CLTB	MAN1A1	GRIN2A	ATP2B2	NRXN1	CALB1	PRKCB	STAT1	LRP4	MEGF8	CACNB2	EFEMP1
GO:0051082	unfolded protein binding	F	CRYAB	DNAJB4	HSP90AB1	HSPA2
GO:0005198	structural molecule activity	F	MAP1B	TUBA4A	CLTB	MAP2	MEGF8
GO:0003682	chromatin binding	F	TOP2B	ACTL6A	RAN	KLHDC3
GO:0005525	GTP binding	F	RAP2A	GNAQ	TUBA4A	RAB5A	SEPT10	RAN	RAB6A
GO:0007268	synaptic transmission	P	HTR2A	DLGAP1	CRH	SYN2	SST
GO:0003779	actin binding	F	MAP1B	CAP2	RDX	PALLD	MYO10	PDLIM5
GO:0016740	transferase activity	F	CAMK2A	PAK1	ITPKB	WNK1	PRKCZ	ITPKA	FGFR3	PRKCB	MAPK9	PAK3	METTL7A	PIP4K2A	PCMT1	PIK3C2A	NEK7	ERBB3
GO:0006915	apoptosis	P	SRGN	PAK1	FGF2	DDIT4	GJA1	LITAF	MEF2C
GO:0007264	small GTPase mediated signal transduction	P	RIN2	RAP2A	RAB5A	RAB6A
GO:0008285	negative regulation of cell proliferation	P	TAX1BP3	FGF2	IFITM1	GJA1	RBBP4	SST
GO:0016192	vesicle-mediated transport	P	CLTB	CPNE3	NAPG	RAB6A
GO:0007399	nervous system development	P	FGF2	DPYSL3	FGF12	ZEB2	AHNAK	MEF2C
GO:0005244	voltage-gated ion channel activity	F	KCNAB1	CLIC4	CACNB2
GO:0004674	protein serine/threonine kinase activity	F	PAK1	WNK1	CPNE3	MAPK9	PAK3	NEK7
GO:0006886	intracellular protein transport	P	CLTB	RAMP1	NAPG	RAN
GO:0006916	anti-apoptosis	P	CRYAB	F3	PRKCZ	YWHAZ
GO:0006811	ion transport	P	GABRB3	KCNAB1	WNK1	ATP5A1	GRIN2A	CLIC4	CACNB2
GO:0006928	cellular component movement	P	ENPP2	VIM	ABI2
GO:0005096	GTPase activator activity	F	RIN2	RGS4	RGS20
GO:0006457	protein folding	P	CRYAB	DNAJB4	HSP90AB1
GO:0016887	ATPase activity	F	ATP5A1	RHOBTB3	KIF1B
GO:0008083	growth factor activity	F	FGF2	FGF1	FGF12
GO:0003676	nucleic acid binding	F	ENPP2	ZCCHC24	BCL11A
[truncated: 26 more columns]

## Sheet: GDS707_GOrevenge_output
Genes and GO terms associated with DEGs enriched in Biological Processes found to be over-represented in nervous tissue transcriptomics data - "Gorevenge output"
in_gene	gene	GO count	prune[0.3]	prune[0.6]	prune[0.9]	GOcount_orig	count_GOterms	GOterms_left
0	TGFB1	115	113	63	9	126	0042306,0045893,0050679,0043552,0042130,0032740,0050765,0035066,0010718,0045786,0007565,0006796,0010552,0022408,0002576,0007568,0009790,0007183,0002028,0010763,0042482,0031100,0031065,0050777,0051897,0007173,0045599,0051280,0007179,0060391,0048535,0043536	3.0879e+74
0	SHH	109	104	55	10	142	0001658,0042130,0090090,0042733,0060523,0021940,0060406,0010552,0010553,0001708,0007507,0060463,0033077,0031069,0035115,0042127,0035116,0071285,0045596,0016539,0002052,0002053,0014706,0030900,0014902,0007267,0010243,0045449,0045445,0060782,0060783,0030010	0021513,0007418,0009952,0060840,0001656,0030539,0007398,0048859,0030850,0030878,0048568,0060484,0031016,0021904,0060664,0060173,0048839,0048645,0060428,0007502,0060447,0048589,0009953,0080125,0061056,0007389,0021978,0043588,0007368,0030901,0060021,0030902
0	BCL2	107	105	68	10	121	0001658,0032868,0031647,0002360,0051924,0032880,0040018,0051881,0014031,0001952,0016337,0048546,0007565,0007569,0010559,0046688,0009791,0033077,0031069,0031103,0008629,0051593,0043524,0034349,0048041,0001836,0048536,0032848,0045930,0000209,0006582,0030097	1.0332e+95
0	BMP4	100	92	43	5	128	0001658,0001525,0090194,0072101,0042733,0010942,0061149,0045786,0072015,0032526,0070244,0043193,0010552,0010553,0060684,0001649,0009791,0030218,0071893,0061151,0061155,0042487,0048392,2000005,0034504,2000007,0060395,0060391,0060393,0072192,0072193,0048593	2.1983e+193
0	CTNNB1	96	94	60	8	117	0001658,0045893,0043123,0042733,0034333,0060742,0016331,0045743,0016337,0071407,0001702,0001701,0010552,0007160,0001708,0033077,0031069,0042129,0035117,0035116,0035112,0060492,0035050,2000008,0006921,0002053,0030900,0001837,0048538,0001501,0048593,0048599	6.0066e+144
0	TNF	87	86	44	10	88	0045429,0043123,0043122,0042346,0050830,0010940,0046330,0043193,0007275,0007165,0032755,0008625,0008624,0043525,0051044,0009651,0060557,0060555,0045599,0006927,0060559,0046325,0044130,0030198,0002740,0002037,0000122,0042493,0033209,0001934,0032722,0032729	60664
0	WNT5A	81	79	44	5	98	0042060,0009790,0030514,0002741,0060638,0060907,0001756,0050679,0060599,0071560,0035121,0043066,0010820,0010595,0071542,0050919,0045080,0040037,0051964,0000187,0008284,0090103,0060340,0045766,0001938,0016055,0046330,0048546,0030324,0007442,0002088,0034613	3.40101e+115
0	FGF10	79	75	41	6	102	0010634,0060615,0050677,0050671,0071338,0050731,0030949,0045931,0050679,0001525,0060436,0032781,0043066,0008589,0030538,0032496,0043410,0050918,0060595,0050930,0032925,0051145,0001759,0008285,0060665,0008286,0042060,0060054,0045740,0003338,0046579,0090263	2.1983e+158
0	SFRP1	76	71	37	4	81	0030514,0090246,0006309,0045668,0001756,0002244,0050679,0071560,0043065,0071504,0071356,0071773,0035019,0048147,0042493,0043066,0071305,0008285,0008284,0001954,2000117,0045765,0014034,0030307,0071392,0071391,0090263,0048546,0032855,0043193,0007275,0071481	2.1915e+32
0	IL1B	72	72	41	8	75	0045429,0051781,0033280,0007613,0043123,0043122,0009408,0032355,0014805,0042346,0051092,0043065,0030730,0051091,0019221,0006955,0043278,0045086,0045080,0010829,0043407,0042060,0045840,0006916,0006915,0032496,0001934,0045766,0046330,0030593,0046627,0006954	1.0332e+18
0	TLR4	71	65	29	4	74	0043065,0070542,0032760,0043123,0060907,0032868,0032689,0050729,0034142,0042346,0051092,0042116,0045429,0006955,0032570,0002282,0045084,0045359,0045087,0006979,0042088,0008063,0032727,0032700,0032497,0032496,0032722,0032707,0032720,0042742,0046330,0032729	6.0729e+18
0	FGFR2	69	65	34	6	87	0060615,0001525,0003148,0045787,0060527,0070374,0090263,0050679,0060045,0009887,0040014,0060349,0071445,0060445,0060595,0060915,0040036,0045165,0008284,0048562,0016331,0021860,0060523,0030855,0035602,0021847,0030324,0060529,0048730,0010453,0006468,0001701	4.8565e+123
0	AKT1	68	66	52	9	73	0045429,0000060,0046329,0009408,0032869,0018105,0005975,0045725,0045600,0006809,0032436,0008637,0032270,0008633,0043491,0030030,0006915,0008286,0005979,0030168,0030307,0016070,0090004,0060709,0030163,0032094,0032880,0006954,0050999,0006469,0006468,0016567	7.0141e+32
0	TP53	66	64	35	8	70	0030512,0000060,0007417,0090403,0001756,0002360,0006289,0006974,0043066,0051097,0042771,0008635,0042493,0051726,0008285,0044419,0006915,0030308,0010670,0033077,0006978,0006355,0001701,0007275,0008104,0010552,0010553,0006461,0007569,0000122,0006302,0045941	1.0165e+25
0	PSEN1	65	64	47	11	70	0043406,0009790,0042987,0015031,0001756,0002244,0006974,0042325,0015813,0030326,0051966,0002286,0051605,0031293,0006915,0001933,0001934,0016337,0048705,0006979,0045860,0050852,0015871,0043393,0006509,0006469,0022008,0000045,0048666,0001708,0060075,0002573	1.608e+32
0	P2RX7	64	62	42	8	68	0006812,0051259,0002028,0009612,0006900,0032963,0032308,0043065,0050830,0045332,0032496,0043410,0006954,0006800,0016079,0046513,0007009,0001934,0048705,0000902,0010043,0001916,0051901,0007005,0006509,0010467,0019228,0007166,0001845,0014070,0043132,0050718	6.88401e+24
0	TGFB2	62	62	47	12	66	0009790,0007435,0045787,0032909,0001654,0043065,0045726,0033630,0030097,0010634,0007179,0010718,0042060,0008285,0008284,0016477,0051891,0010002,0045823,0030308,0030307,0032874,0022601,0030593,0032570,0045216,0006468,0060389,0051795,0048666,0002576,0007507	1.94201e+24
0	CAV1	62	60	36	9	66	0042632,0030514,0090263,0009612,0007519,0051480,0008104,0046426,0032570,0090090,0043627,0016050,0031623,0042493,0008285,0044419,0070836,0060056,0001937,0032091,0045768,0033344,0030301,0031116,0050999,0045907,0010553,0007584,0001666,0019915,0009967,0055074	3.3484e+25
0	SMAD3	57	56	41	6	63	0001501,0042177,0019049,0000122,0045930,0090263,0001756,0050678,0002076,0030501,0043066,0031053,0006955,0032909,0051098,0050927,0010718,0008633,0008285,0001933,0001889,0030308,0045668,0070306,0006919,0045216,0060290,0001701,0042993,0010552,0010553,0042060	9.88e+38
0	THBS1	56	52	36	11	57	0043536,0043537,0010596,0030511,0045727,0010759,0010595,0032570,0043032,0010751,0040037,0010754,0006917,0006916,0006915,0042327,0001953,0016525,0045766,0010670,0043154,0018149,0009749,0042493,0002040,0002576,0002605,0032695,0001666,0016477,0010763,0030335	3417
0	AGT	56	53	36	9	63	0002034,0007199,0003078,0042127,0001658,0002016,0009409,0050729,0030432,0051092,0043065,0034374,0010595,0045723,0042756,0040018,0043410,0019229,0051145,0008285,0045742,0006883,0030308,0046622,0006800,0042445,0007160,0001558,0050731,0008065,0032270,0001998	1.568e+45
0	NOD2	55	49	19	4	58	0032760,0043123,0051259,0051403,0032755,0051092,0050830,0045089,0034142,0050766,0045087,0008063,0032701,0032703,0032496,0090022,0032720,0006952,0046330,0032498,0007254,0032495,0034134,0002755,0050731,0050718,0002756,0032695,0032874,0043330,0002253,0002862	2.367e+17
0	INS	55	50	33	7	57	0006112,0042177,0045429,0050709,0050708,0005975,0015758,0045725,0043066,0045721,0043410,0000165,0042060,0045840,0046628,0008286,0045821,0030307,0045861,0032880,0032270,0006006,0006953,0045909,0050995,0060267,0055089,0050731,0002674,0008284,0045922,0051000	425930031018
0	EDN1	55	53	32	6	58	0045429,0043406,0001569,0046887,0060298,0031583,0043179,0010613,0051482,0010595,0030072,0048016,0014826,0019229,0045840,0014032,0045987,0030593,0030147,0030146,0001701,0030818,0042474,0048661,0007166,0007507,0060585,0045793,0008284,0001516,0001666,0007186	5.1216e+18
0	BMP2	54	53	35	5	59	0001501,0001658,0045786,0003181,0009612,0055008,0010922,0045449,0001701,0010862,0060804,0010718,0071363,0008285,0045666,0001934,0003130,0001938,0045669,0006954,0007219,0045941,0010552,0010553,0060389,0001649,0009790,0009887,0048711,0001666,0003203,0045165	3.5054e+32
0	STAT5B	53	50	32	6	57	0048541,0051272,0045931,0045954,0070672,0043066,0070670,0019221,0040018,0032825,0045086,0043434,0040014,0046449,0032496,0030856,0006953,0045647,0006631,0006573,0007565,0001553,0006357,0019530,0042448,0032355,0006549,0019915,0045885,0032870,0045944,0033077	4.3029e+25
0	IGF1	53	51	34	7	60	0001501,0060741,0007517,0050731,0014896,0050679,0045725,0040014,0045445,0050650,0046579,0009441,0043568,0045840,0008284,0045821,0030166,0014834,0060740,0043193,0060509,0010552,0042523,0034392,0007399,0007165,0048015,0048661,0048754,0008285,0060463,0051246	6.0736e+46
0	VEGFA	52	51	34	6	60	0043536,0048593,0002687,0009409,0048844,0001525,0043066,0010595,0050930,0031077,0048255,0008284,0048469,0030855,0045766,0001938,0001569,0060754,0042088,0030949,0001701,0048010,0007275,0048739,0007399,0048661,0009967,0050731,0045944,0051272,0006916,0001570	4.3129e+53
0	TLR2	52	45	21	4	53	0045429,0030177,0060907,0002687,0050729,0051770,0042346,0051092,0042496,0050830,0032741,0032570,0034142,0042892,0002282,0045087,0008063,0006917,0032700,0042495,0034123,0032722,0032493,0032760,0052063,0006955,0032728,0032868,0002238,0007252,0010552,0007165	9636
0	LEF1	52	52	36	5	60	0060710,0006917,0045893,0045892,0001756,0016481,0045063,0043066,0000122,0021987,0043966,0071353,0043923,0032696,0090068,0008284,0045843,0048468,0060326,0030854,0030307,0030223,0016055,0043967,0030326,0010718,0010552,0022408,0060070,0014070,0045941,0071899	3.0879e+53
0	DRD1	52	52	21	8	55	0001659,0007416,0007190,0032869,0060292,0030432,0051968,0019226,0042755,0007628,0060291,0035106,0019228,0007626,0060134,0006886,0006936,0051584,0015872,0042493,0006469,0030819,0007191,0001975,0046960,0060158,0007189,0042053,0007187,0007625,0001662,0001661	2.1756e+18
0	CDK1	52	52	32	7	54	0007411,0000186,0033160,0045931,0051403,0000083,0000082,0030261,0055015,0071445,0034142,0045087,0000165,0008063,0006916,0008286,0045740,0070301,0051301,0042493,0046686,0000086,0048011,0006461,0007067,0007569,0046688,0002755,0034134,0002756,0051439,0000075	148230009636
0	TRAF6	51	51	27	5	53	0051023,0000122,0043123,0051403,0000209,0051092,0002726,0045410,0070534,0032743,0034142,0045084,0009887,0045087,0042088,0008063,0031666,0031293,0006915,0048468,0050852,0050870,0051865,0007254,0007250,0048011,0001843,0007165,0048661,0042475,0002755,0002756	15030045453
0	SOD1	50	49	39	10	54	0031667,0006309,0009408,0042554,0045541,0000303,0019430,0043065,0019226,0040014,0006749,0006801,0042493,0060052,0006916,0030168,0046620,0050665,0001541,0043524,0007566,0001975,0002576,0007569,0046688,0033081,0055114,0006302,0042542,0008219,0007605,0045471	1.895e+24
0	SNCA	50	48	30	8	50	0060732,0051622,0031115,0042775,0034599,0010642,0031623,0032410,0050812,0001956,0006916,0006638,0032496,0006919,0010040,0006631,0007006,0032026,0035067,0042493,0014059,0060079,0060291,0045807,0010517,0055074,0033138,0045920,0032769,0048488,0043154,0008219
0	PPARG	50	49	39	6	51	0045713,0032869,0015909,0033993,0045600,0034339,0000122,0051974,0043627,0045087,0042493,0008285,0033189,0048469,0030855,0030308,0030224,0055088,0050873,0050872,0006919,0010891,0048714,0010552,0010553,0007584,0007165,0031000,0006917,0045944,0002674,0009409	42593
0	DRD2	50	45	21	8	55	0001659,0050709,0007416,0007194,0007195,0030432,0051927,0008104,0051482,0007628,0042220,0032922,0051584,0051967,0051586,0008285,0060134,0034776,0042417,0050482,0030147,0030146,0007270,0001975,0030814,0048755,0060158,0002027,0043278,0007409,0007243,0008306	1.976e+31
0	ADORA2A	50	49	30	10	51	0007417,0014061,0007190,0050728,0051968,0040013,0042755,0051925,0014049,0051881,0008285,0060134,0006915,0032230,0006171,0048812,0030147,0006954,0006355,0060079,0006469,0030819,0001975,0014057,0031000,0007626,0007189,0007188,0050714,0046636,0048011,0042311	7600
0	JAK2	49	49	36	6	51	0000186,0045429,0007204,0033160,0050731,0050729,0043065,0051091,0019221,0032516,0042977,0007167,0008631,0008285,0008284,0045822,0006468,0022408,0042508,0014068,0007165,0007259,0060399,0030218,0031959,0016568,0007186,0030335,0046777,0031103,0042523,0023034	74980046677
0	APOE	49	49	35	6	54	0042632,0043537,0032805,0048844,0045541,0006898,0000302,0006707,0010873,0042159,0042158,0034372,0034375,0042157,0008203,0006917,0019934,0001937,0055088,0033344,0014012,0007271,0045471,0046907,0043407,0030516,0050728,0006916,0051000,0043691,0007186,0008219	3.4382e+32
0	RHOA	48	42	26	7	48	0007411,0043124,0007160,0045785,0042346,0007519,0051927,0045727,0007596,0033144,0008064,0045471,0042493,0051056,0044419,0045666,0048812,0000902,0043123,0030036,0030307,0043525,0045907,0009749,0043524,0030838,0006357,0050772,0048011,0031098,0048015,0045665
0	RELA	48	48	31	5	50	0042177,0043123,0032868,0009612,0051092,0009887,0019221,0006916,0032570,0034142,0045084,0045087,0051607,0006968,0008063,0042493,0008284,0032496,0001889,0050852,0046627,0006954,0032495,0048011,0032332,0007568,0014070,0002755,0043278,0002756,0045944,0044419	102240001942
1	FGF2	48	48	39	8	48	0043536,0001658,0060129,0045892,0060591,0043537,0050679,0048864,0046668,0010863,0051726,0001759,0008285,0008284,0006915,0008286,0045765,0042060,0045766,0060548,0030324,0006700,0045941,0010552,0002042,0007399,0007165,0009790,0009887,0006935,0010001,0060644
0	WNT4	47	45	28	6	62	0001658,0072162,0045892,0048599,0030325,0032967,0071560,0043066,0042445,0051145,0060129,0033080,0072273,0001889,0061369,2000066,2000019,0090002,0045669,0040037,0043193,0010551,0090263,0022407,2000225,0060748,0045941,0033077,0010894,0060070,0010629,0072034	6.1205e+102
0	PRKCA	47	46	30	7	49	0070555,0050729,0000302,0048259,0050930,0043434,0051965,0008285,0001933,0045822,0006937,0030168,0016071,0016070,0030593,0046627,0006469,0051412,0017148,0048011,0032355,0007568,0048661,0035408,0050730,0002026,0002062,0045921,0050796,0008629,0009612,0045471	466770009636
0	NKX2-5	47	43	28	3	55	0060928,0060929,0045893,0007512,0055008,0043066,0000122,0030097,0055005,0055007,0051929,0008284,0045666,0045823,0003350,0010735,0060347,0043193,0007275,0010552,0010553,0060261,0060037,0032355,0003222,0045885,0055014,0055015,0055117,0045944,0003151,0001570	3.0878e+53
0	MAPK1	47	47	31	10	49	0007411,0045941,0006950,0051403,0006974,0045727,0009887,0032496,0034142,0043627,0045087,0000165,0008063,0006917,0008284,0008286,0006935,0030168,0019858,0050852,0007049,0031663,0048011,0007165,0002755,0002756,0044419,0043330,0019233,0030335,0023034,0007596	96360060716
0	IL6	47	47	29	5	48	0002384,0032966,0051092,0045727,0050830,0046427,0031175,0002446,0043410,0070102,0051607,0033138,0008285,0008284,0006959,0045765,0032722,0030168,0006953,0045768,0002675,0045669,0050871,0006954,0043193,0010574,0048661,0050731,0045944,0051024,0002690,0032494	31018
0	STAT5A	46	44	27	5	49	0048541,0045931,0045954,0043066,0018108,0019221,0033026,0040018,0032825,0045086,0043434,0040014,0046449,0008284,0030856,0045647,0006631,0006573,0007565,0001553,0006357,0006549,0019915,0060742,0045885,0045944,0033077,0045579,0007595,0042104,0030155,0060376	4.3029e+18
0	RIPK2	46	44	21	3	46	0031663,0050852,0043123,0051403,0031398,0070673,0043065,0070671,0050830,0032743,0034142,0006954,0008063,0006916,0006915,0045087,0032722,0070427,0046330,0032729,0045627,0007254,0048011,0007165,0002755,0034134,0002756,0032874,0043330,0032755,0042098,0071224
0	IFNG	46	45	28	5	47	0045429,0045893,0000060,0045785,0030968,0019221,0045449,0060552,0045084,0045080,0001781,0045666,0045348,0048304,0030593,0042493,0042508,0042832,0034393,0048662,0007166,0002026,0050718,0045410,0051712,0009615,0032224,0050796,0042102,0050776,0040008,0042742	19882
0	PTGS2	45	44	28	5	47	0033280,0031915,0051926,0043065,0051968,0045429,0006805,0050727,0006979,0042493,0051726,0008285,0032496,0090362,0010042,0006633,0045987,0031622,0045907,0007566,0010575,0030282,0048661,0014070,0034097,0055114,0001516,0006692,0006693,0090271,0032227,0090050	307280042640
0	OXT	45	40	18	4	48	0002027,0001696,0042711,0007204,0030431,0060450,0042755,0032570,0042756,0042220,0043434,0051965,0009744,0003077,0003079,0006950,0034695,0007565,0060406,0002125,0060179,0001975,0032355,0007165,0014070,0007507,0045925,0070474,0007625,0044058,0051591,0032526	5.1602e+18
0	NOTCH1	45	45	35	4	52	0009790,0030514,0042246,0003180,0045687,0043065,0043066,0001701,0045449,0050767,0008284,0046533,0001889,0045662,0060548,0045668,0030324,0060528,0007440,0002040,0007219,0001708,0048663,0048754,0007507,0045944,0007409,0060768,0060740,0050793,0010812,0031069	7.283e+45
0	NF1	45	45	33	4	49	0051056,0048593,0043535,0021987,0048844,0045685,0043065,0000165,0042060,0045762,0001952,0050890,0030036,0032318,0030325,0006469,0048715,0042992,0007165,0001666,0001649,0007507,0043407,0048485,0007420,0007422,0007406,0021897,0043409,0030336,0045124,0045765	4.3473e+25
0	FOXP3	45	38	15	3	51	0009790,0002666,0045892,0032689,0002669,0042130,0045066,0000122,0042110,0045085,0002851,0043433,0008285,0032703,0032720,0050852,0035067,0035066,0006355,0045941,0032831,0010552,0031064,0048294,0060501,0032693,0009791,0032792,0002677,0042036,0050710,0006338	7.389e+38
0	EP300	45	45	36	8	46	0060298,0033160,0001756,0007519,0045727,0051091,0009749,0042771,0018393,0043627,0042493,0007399,0043491,0044419,0006915,0001934,0001889,0032025,0045862,0070301,0031325,0030324,0043967,0007049,0060177,0018076,0032967,0014070,0007507,0009887,0045944,0001666	48565
0	UBA52	44	41	17	3	47	0043123,0051403,0000082,0051092,0006977,0034142,0045087,0008063,0016032,0006916,0006915,0000187,0044267,0016070,0050852,0007254,0048011,0006464,0002755,0019058,0002756,0051439,0000075,0051436,0051437,0019083,0042059,0008624,0000278,0031145,0034134,0032480	2.16e+16
0	TGFBR1	44	43	25	6	52	0001501,0009790,0045885,0051272,0048844,0006468,0045602,0043066,0045449,0043627,0010862,0006917,0008284,0030307,0034695,0030324,0008354,0001701,0007566,0045941,0048870,0060389,0048663,0007568,0014070,0007507,0009791,0001666,0046777,0031100,0051897,0051491	4.8565e+53
0	SFRP2	44	44	31	4	50	0001569,0090263,0001756,0031668,0030514,0035121,0045600,0033630,0071481,0042733,0042493,0010719,0008285,0008284,0045766,0030307,0045768,0048546,0008219,0060349,0007275,0010552,0001843,2000035,0050732,0033138,0003151,0002063,0032582,0050680,0090175,0030336	7.1425e+39
0	NOS3	44	43	32	8	45	0031663,0014740,0009408,0051926,0006809,0043434,0042493,0008285,0006916,0032496,0006527,0045766,0030324,0007005,0050999,0032355,0045909,0048662,0014070,0043542,0034097,0055114,0001666,0051346,0050880,0002028,0034405,0014806,0045471,0008217,0031284,0046209	1974
0	MAP2K1	44	44	32	5	46	0007411,0032968,0051403,0048313,0034142,0030216,0045087,0006979,0000165,0008063,0008285,0008286,0006935,0051291,0030182,0003056,0048812,0048870,0048011,0007067,0007165,0002755,0090398,0002756,0032320,0030335,0007050,0032402,0023034,0034134,0047496,0034130	607110060674
0	INSR	44	44	34	6	48	0033280,0031667,0001933,0032869,0045725,0045429,0045444,0043410,0032410,0000187,0045840,0008284,0008286,0051290,0019087,0045740,0010042,0009749,0034612,0032355,0060267,0051789,0007186,0030335,0005975,0033574,0010629,0046777,0045471,0001934,0051897,0003007	4.2593e+25
0	DRD3	44	41	25	4	44	0050709,0002031,0002016,0007191,0007194,0007195,0040012,0040014,0046717,0000122,0042220,0032416,0051584,0042493,0045840,0008284,0032922,0034776,0042417,0050482,0014059,0048715,0001975,0030814,0043278,0045944,0060134,0007186,0051898,0045471,0050883,0045187
0	BMP7	44	43	26	4	55	0001501,0045839,0033280,0045786,0048596,0001654,0043065,0072040,0050768,0072125,0010942,0042326,0043434,0010862,0045746,0045666,0007411,0048468,0030855,0060548,0045669,0030326,0060687,0060686,0032355,0048754,0045941,0043407,0009887,0060445,0045944,0043401	1.503e+73
0	RPS27A	43	40	16	3	46	0043123,0051403,0000082,0051092,0006977,0034142,0045087,0008063,0016032,0006916,0006915,0000187,0044267,0016070,0050852,0007254,0048011,0002755,0019058,0002756,0051439,0000075,0051436,0051437,0019083,0042059,0008624,0000278,0031145,0034134,0032480,0034130	2.16e+16
0	PTEN	43	43	29	6	45	0001525,0006917,0007417,0031647,0043066,0051091,0050765,0042493,0008285,0016477,0001933,0010043,0050852,0009749,0046685,0006629,0060070,0048738,0007584,0007568,0014070,0007507,0043542,0010975,0000079,0050680,0030336,0050821,0051898,0033198,0048011,0045471	607360008283
0	IL10	43	42	25	5	44	0030886,0006950,0032800,0032868,0032689,0050728,0030889,0042130,0051091,0045355,0002740,0030097,0042493,0006916,0045191,0030183,0032720,0042742,0030595,0006955,0006954,0043193,0007253,0002237,0032695,0042100,0050715,0042092,0032496,0002904,0045348,0051045	14823
0	EGFR	43	43	31	8	48	0007411,0043406,0007435,0045429,0043006,0045930,0050679,0033993,0043066,0006970,0042327,0006979,0008284,0000902,0016337,0006950,0048546,0050999,0048812,0007165,0048661,0007166,0050730,0031659,0007243,0042059,0030335,0046777,0051592,0051205,0051897,0007623	1.503e+31
0	SLIT2	42	36	21	6	48	0007411,0008045,0002689,0022029,0090260,0051058,0043065,0071504,0010593,0010596,0070100,0050919,0007399,0008285,0031290,0001933,0016337,0030308,0014912,0061364,0090288,0001701,0051414,0007275,0043116,0002042,0030837,0048754,0090024,0032870,0035385,0030336	3.5555e+39
0	PTK2B	42	42	30	7	43	0043534,0032863,0001525,0009725,0045471,0045727,0006970,0031175,0042220,0042976,0006800,0043149,0042493,0008284,0006915,0030279,0030307,0045768,0006950,0009749,0000165,0006468,0001556,0006461,0007165,0001666,0042542,0030154,0030335,0034329,0009612,0043507	14009
0	JUN	41	40	33	7	42	0045941,0001525,0051403,0032496,0051090,0034142,0045087,0042493,0043923,0043922,0008285,0035026,0007623,0045740,0043392,0051726,0007568,0048661,0014070,0002755,0002756,0034097,0045944,0042542,0007184,0051899,0009612,0051591,0043525,0034134,0034130,0045657	9987
0	ADA	41	37	21	5	43	0046111,0002686,0050728,0043066,0033632,0042110,0043101,0009117,0006157,0001889,0055086,0033089,0050850,0070244,0048541,0060407,0001701,0006154,0001829,0002314,0007568,0046101,0046061,0046103,0030890,0001666,0042542,0002906,0002636,0032261,0046638,0045187	485660048286
0	SOD2	40	39	26	6	43	0045429,0031667,0042554,0000303,0019430,0001315,0043066,0030097,0006749,0006801,0042493,0008285,0006916,0001889,0048773,0051881,0050665,0007005,0006357,0048666,0007568,0007507,0009791,0055072,0055114,0001666,0042542,0050790,0008217,0043524,0045599,0003069	1.4823e+18
0	CDK5	40	40	31	8	45	0007411,0021987,0031914,0032801,0045956,0030866,0007519,0031175,0046826,0045786,0006886,0006913,0030182,0035249,0045860,0060079,0048813,0007160,0009790,0021766,0051301,0033136,0001764,0048488,0019233,0030334,0009611,0031397,0043113,0043525,0021954,0014044	2.1697e+32
0	CCL2	40	40	29	6	44	0009408,0090265,0010759,0019221,0032570,0042493,0006916,0006959,0032496,0006935,0016525,0001938,0030593,0006954,0006468,0048010,0010574,0007165,0007259,0007166,0009887,0019079,0001666,0007187,0007186,0009617,0031100,0009612,0045471,0048247,0048246,0050806	1.0332e+25
0	TSC2	39	39	29	7	39	0051056,0021987,0008104,0023034,0050918,0030100,0051726,0043491,0008285,0030030,0008286,0051291,0006953,0046626,0006469,0048011,0001843,0016192,0048015,0007507,0043407,0045792,0043547,0032956,0050680,0051260,0051898,0032007,0051893,0071109,0051492,0006897
0	TP63	39	39	25	6	48	0001501,0045893,0045892,0002053,0035121,0060197,0043589,0042771,0030326,0006978,0045747,0006916,0006915,0030308,0030859,0060529,0010259,0043193,0010552,0000122,0006917,0048485,0009887,0002064,0045617,0031069,0001302,0043523,0034644,0031571,0060513,0051289	7.389e+59
0	CHRNB2	39	33	18	6	41	0033603,0060084,0042113,0042220,0051963,0042320,0007626,0007271,0050890,0006939,0014059,0048814,0021562,0007605,0045188,0007601,0042053,0030890,0001666,0001661,0032226,0019233,0051899,0045471,0035094,0006811,0006816,0007165,0008306,0021952,0035176,0008542	508770021771
0	ADIPOQ	39	38	25	5	41	0032270,0043124,0043123,0050728,0033034,0045721,0010804,0045471,0050765,0030853,0046888,0009744,0010739,0032720,0006091,0050873,0009749,0006635,0034612,0007584,0009967,0050731,0045923,0001666,0051260,0051899,0010745,0010875,0045650,0045599,0060081,0045777	425930034383
0	WNT11	38	38	32	6	44	0045941,0048844,0043065,0043066,0060197,0032915,0003151,0070830,0030308,0060548,0030325,0061101,0006468,0007275,0010551,0060070,0030282,0001649,0071300,0090272,0030336,0010628,0010629,0051496,0090090,0007165,0090037,0007223,0032320,0061037,0072201,0030182	9.79801e+38
0	TGFB3	38	38	28	7	44	0007435,0030512,0032967,0032570,0043627,0010862,0010718,0071363,0008285,0045740,0022601,0045216,0007565,0001701,0043193,0034616,0060364,0070483,0007568,0009790,0006917,0045944,0001666,0050714,0030501,0042476,0008156,0043524,0051491,0002576,0016049,0030168	3.0879e+39
0	SOX2	38	37	30	6	47	0045941,0021987,0006325,0021781,0001654,0050910,0050973,0000122,0090090,0043410,0045747,0045665,0045666,0043281,0030858,0045668,0006355,0001708,0048663,0001649,0060441,0045944,0050680,0048852,0046148,0007050,0035019,0032526,0043586,0060042,0010468,0021879	2.1983e+60
0	SLC11A1	38	38	22	5	41	0042060,0000060,0055072,0045730,0042116,0006826,0050766,0006828,0002369,0032496,0055085,0070574,0070839,0015707,0032729,0006954,0042832,0048255,0043091,0010628,0060586,0045944,0045342,0009617,0050829,0006811,0042742,0006879,0007035,0002606,0002827,0006876	4.8002e+18
0	PROX1	38	38	29	2	46	0060298,0060849,0048845,0055009,0010595,0000122,0045787,0030240,0055005,0008285,0008284,0070309,0070365,0001889,0001938,0043433,0060059,0030324,0002088,0043193,0007275,0001709,0045893,0070858,0007420,0055010,0060421,0045071,0045737,0060836,0045750,0060042	2.1516e+53
0	APC	38	37	23	6	49	0030858,0045785,0060770,0051276,0043065,0043066,0031175,0090090,0042493,0051726,0008285,0006915,0045667,0070830,0007026,0031274,0007409,0031116,0060070,0006461,0051988,0051171,0033077,0043409,0045732,0042483,0030335,0045736,0007050,0035019,0007163,0006974	1.94201e+73
0	SIRT1	37	36	29	7	38	0031937,0007517,0009267,0006364,0006974,0034339,0043518,0051097,0000122,0000183,0080134,0043433,0018394,0044419,0045768,0006281,0050872,0042981,0007275,0032071,0034983,0016575,0030154,0033158,0042127,0045739,0045599,0007569,0016481,0006342,0006343,0006260	7283
0	ITGA2	37	37	26	9	41	0007411,0045785,0002687,0032967,0045727,0032870,0006971,0010634,0043388,0042493,0044419,0070365,0014911,0045987,0033343,0031346,0007160,0014075,0050729,0048661,0010694,0009887,0001666,0009612,0050927,0051971,0033591,0045184,0006928,0007229,0043589,0050966	1.485e+25
0	GPX1	37	37	30	7	42	0051702,0001659,0043534,0042744,0045444,0009609,0008631,0006917,0055086,0060055,0001885,0018158,0007605,0006195,0043403,0006916,0042542,0043154,0002862,0009611,0033599,0048741,0042311,0006629,0043523,0045454,0051897,0061136,0060047,0006144,0014902,0010269	9.65001e+31
0	GHR	37	33	15	2	38	0043278,0032869,0070555,0046427,0040018,0042977,0043434,0031623,0040014,0046449,0006631,0032094,0042523,0032355,0006549,0007259,0050731,0032870,0019530,0044236,0000255,0046898,0043526,0009755,0006600,0006897,0045597,0051384,0048009,0000187,0006573,0060396	60351
0	ERCC2	37	37	30	8	43	0006368,0000718,0043249,0006360,0006361,0006362,0006363,0006366,0006367,0043066,0045449,0040016,0043388,0006979,0016032,0006917,0044419,0035315,0006139,0001701,0006350,0030282,0007568,0009791,0045944,0000075,0006370,0050434,0060218,0030198,0032289,0010467	9.65e+38
0	CDKN2A	37	36	21	7	38	0031648,0006309,0031647,0006364,0030889,0070534,0045449,0042326,0043517,0008285,0008637,0001953,0030308,0071158,0046825,2000111,0007049,0006469,0034393,0010389,0006917,0090398,0090399,0045944,0000075,0000209,0000082,0050821,0045736,0051444,0000278,0032088	80
0	APOA2	37	35	21	8	38	0042632,0002740,0033700,0031647,0060192,0034374,0034375,0010903,0034370,0043627,0042157,0042493,0008203,0044419,0009395,0033344,0009749,0030300,0032375,0006656,0050995,0050996,0060621,0045416,0043691,0044255,0031100,0010873,0006810,0006629,0006457,0051384	34384
0	APOA1	37	36	24	8	39	0042632,0043534,0002740,0042158,0010903,0042157,0008203,0008202,0001932,0055085,0030168,0033344,0030325,0030301,0030300,0006656,0002576,0019915,0050713,0051346,0051347,0043691,0051345,0050821,0044255,0070508,0033700,0010873,0008211,0006695,0006644,0006629	19350034384
0	WNT7A	36	36	25	8	46	0001501,0021987,0007416,0070307,0048864,0071560,0043066,0008105,0046590,0050768,0042733,0043627,0051965,0035116,0060054,0030010,0021846,0046330,0031133,0014834,0007257,0021707,0043193,0007275,0010551,0090263,0060070,0014719,0045941,0007409,0035115,0042127	7.548e+66
0	UBC	36	33	12	3	38	0043123,0051403,0000082,0051092,0006977,0034142,0045087,0008063,0016032,0006916,0006915,0016071,0016070,0050852,0007254,0048011,0002755,0002756,0051439,0000075,0051436,0051437,0042059,0008624,0000278,0031145,0034134,0032480,0034130,0007173,0034138,0000187	840000216
0	UBB	36	33	12	3	38	0043123,0051403,0000082,0051092,0006977,0034142,0045087,0008063,0016032,0006916,0006915,0016071,0016070,0050852,0007254,0048011,0002755,0002756,0051439,0000075,0051436,0051437,0042059,0008624,0000278,0031145,0034134,0032480,0034130,0007173,0034138,0000187	840000216
0	SPHK1	36	36	23	5	36	0045931,0031398,0042346,0051092,0043066,0070555,0032570,0010803,0001956,0006916,0001934,0006670,0045766,0030307,0070301,0007565,0014075,0007165,0014070,0010976,0051084,0030335,0009267,0023034,0033198,0006457,0019371,0019722,0046521,0044267,0032026,0051789
0	RPS6KB1	36	36	27	8	38	0032868,0045931,0000082,0043066,0042493,0043491,0016477,0008286,0014911,0009749,0007049,0009408,0006468,0045948,0007584,0007165,0007568,0048661,0014070,0032870,0048015,0014732,0031929,0033574,0033762,0032496,0009611,0009612,0045471,0048633,0007281,0051384	96360014878
0	PTPRC	36	33	18	5	37	0007411,0051209,0001916,0034113,0043065,0046641,0002378,0043410,0030890,0051607,0051726,0033261,0045588,0045860,0050852,0050855,0050857,0001915,0006469,0016311,0007166,0050732,0045577,0042100,0042102,0002925,0045059,0045060,0030217,0000187,0007159,0031953	10332
0	PSEN2	36	33	24	8	40	0015031,0001756,0002244,0043065,0002286,0051605,0031293,0006915,0001933,0050852,0030326,0006509,0007219,0042987,0048011,0001708,0002573,0009790,0006916,0048854,0001666,0050820,0008219,0050435,0008624,0006816,0007176,0007220,0040011,0016485,0060048,0048167	4.264e+25
0	NFKBIA	36	33	18	4	36	0031663,0045941,0000060,0042345,0051092,0034142,0045087,0032270,0008063,0032495,0045746,0006915,0032496,0070427,0050852,0042994,0007253,0032088,0010552,0048011,0002755,0034134,0002756,0044419,0043330,0010745,0042127,0043392,0010875,0006916,0070431,0045638
0	MTOR	36	35	25	6	37	0005979,0032868,0032095,0018107,0010592,0031529,0008286,0032314,0031295,0001938,0030163,0030838,0006468,0016310,0048011,0007584,0007165,0048015,0050731,0045792,0032956,0031929,0007281,0046777,0043610,0051496,0023034,0051897,0016049,0045859,0045727,0043200	40007
0	HTT	36	36	25	7	43	0030073,0007212,0051881,0007626,0006916,0006915,0019244,0007029,0006888,0007005,0022008,0042445,0048666,0046902,0007569,0008088,0009790,0006917,0055072,0009887,0007420,0008219,0016197,0000050,0051592,0000052,0043524,0051938,0047496,0006606,0035176,0008542	2.199e+46
0	HMOX1	36	34	25	8	40	0006788,0001525,0043123,0002686,0043305,0043433,0043627,0008630,0006916,0045765,0045768,0045080,0032764,0007588,0045909,0048662,0048661,0031670,0055072,0042167,0001666,0006778,0051260,0042542,0008219,0014806,0055085,0008217,0043619,0006879,0051090,0002246	3.4101e+25
0	GHRL	36	34	21	5	37	0001696,0046010,0045409,0050728,0009725,0043066,0040013,0042127,0040018,0043627,0042322,0051965,0006916,0016525,0001937,0060079,0006006,0016358,0032691,0043400,0051464,0007186,0008154,0046676,0030252,0009755,0060124,0060399,0008343,0032024,0000187,0051461	51216
0	FOS	36	36	22	4	39	0045941,0006306,0009409,0051403,0031668,0030431,0051090,0032870,0032570,0034142,0045087,0042493,0008063,0007399,0032496,0006954,0007565,0006357,0051412,0034614,0007568,0014070,0002755,0002756,0034097,0045944,0001661,0009612,0051591,0034134,0034130,0034138	9.629e+17
0	CACNA1A	36	36	25	9	39	0007416,0042133,0007628,0006811,0055085,0035249,0048791,0006006,0007274,0021702,0042445,0032353,0008219,0007214,0048813,0021522,0000096,0014051,0051899,0050796,0048266,0043113,0050770,0043524,0050883,0016049,0050885,0007204,0030644,0006112,0060024,0007268	2.1679e+18
0	ASCL1	36	31	22	5	38	0071259,0021987,0021779,0021530,0043066,0050769,0003359,0045747,0045665,0045666,0060487,0061104,0061103,0061102,0061100,0007219,0048665,0048485,0045944,0021527,0007405,0001764,0007400,0021892,0051593,0032526,0043525,0021954,0014003,0021879,0060163,0022008	73890060166
0	AQP1	36	29	23	6	39	0006182,0015696,0043066,0071549,0006813,0042493,0030185,0071732,0055085,0035377,0045766,0035378,0070301,0033326,0071300,0071260,0042476,0003097,0071320,0071241,0030950,0030157,0085018,0071456,0071472,0050891,0071474,0071280,0034644,0015670,0071288,0033554	6.884e+17
0	APP	36	36	26	11	38	0008542,0045931,0051402,0040014,0031175,0051124,0045087,0051563,0007626,0035235,0030168,0007219,0006468,0048669,0016199,0002576,0016358,0008088,0006917,0006378,0045944,0007409,0007617,0008219,0006417,0007176,0006878,0006897,0016322,0030198,0050885,0008344	508030000085
0	WNT3A	35	35	28	6	47	0045941,0090263,0001756,0035121,0090047,0050768,0003136,0008284,0001934,0030182,0021846,0032092,0001701,0007275,0010552,0060070,0071300,0021766,0033138,0021527,0007409,0048103,0009653,0021874,0002092,0045599,0030198,0045595,0048343,0060026,0042472,0035413	9.88e+80
0	WNT10B	35	35	28	4	41	0090263,0045899,0043065,0051091,0032434,0051885,0071374,0060346,0008284,0030182,0071407,0016055,0030858,0045669,0014835,0007275,0010552,0010553,0060070,0071300,0010971,0051246,0050821,0043586,0002062,0071320,0050680,0048641,0048741,0030501,0007223,0006629	9.798e+38
0	MAPK3	35	33	17	8	36	0007411,0031663,0006360,0006361,0051403,0006974,0051090,0009887,0034142,0045087,0000165,0008063,0044419,0008286,0030168,0007049,0006468,0006350,0048011,0002755,0002756,0043330,0019233,0032496,0023034,0007596,0034134,0034130,0007173,0034138,0000186,0000187	51216
0	GLI3	35	34	24	5	52	0007411,0001658,0048593,0021775,0021776,0045060,0000122,0042733,0008285,0070242,0030324,0007442,0001701,0045941,0010552,0032332,0048663,0042475,0007507,0045944,0033077,0021631,0090090,0060831,0046638,0046639,0045879,0045596,0016485,0048557,0035108,0048704	7.389e+115
0	GLI2	35	31	22	3	52	0001501,0021775,0021776,0021696,0002076,0000122,0042733,0008284,0045666,0007411,0021965,0045740,0071407,0030324,0007442,0001701,0009913,0032331,0048754,0007507,0008589,0060603,0045944,0002009,0006915,0030154,0048666,0090103,0021938,0060831,0007224,0033089	2.1983e+116
0	ERBB2	35	35	29	6	38	0007411,0043406,0008045,0045785,0050679,0007519,0043066,0045449,0032570,0043410,0046579,0042493,0007399,0045765,0001889,0010001,0033088,0060209,0007169,0006468,0014068,0042060,0007165,0048015,0007167,0007166,0007507,0048485,0007422,0007528,0046777,0060056	3.0879e+18
0	ENG	35	33	20	5	35	0001569,0030512,0030513,0003084,0048844,0048745,0045449,0042325,0010862,0070483,0016477,0001934,0060326,0001937,0010552,0010553,0042060,0048845,0007507,0048870,0001570,0001666,0051001,0030509,0030155,0001300,0042127,0022617,0007179,0060394,0022009,0031953
0	CREB1	35	35	26	6	37	0007411,0001756,0042752,0034142,0040018,0045087,0042493,0008063,0044419,0046887,0006355,0006468,0006351,0010552,0048011,0007165,0048015,0002755,0002756,0045944,0051403,0008361,0007595,0023034,0032916,0034134,0034130,0034138,0007179,0042981,0007268,0002224	219830030917
0	AXIN1	35	35	21	6	42	0090244,0021881,0035121,0090041,0090090,0055001,0060823,0043623,0010800,0006915,0001934,0071407,0046330,0007257,0007275,0060070,0007605,0045941,0033138,0051248,0051260,0045732,0008219,0031398,0060272,0030178,0045599,0071514,0031122,0035412,2000060,0006913	1.743e+45
0	ATP7A	35	31	22	8	41	0051353,0019430,0006584,0006825,0048251,0007626,0055085,0010273,0042414,0007005,0048812,0006568,0021702,0002082,0006754,0042428,0034220,0042093,0008219,0031069,0051542,0021860,0043526,0021954,0015677,0006878,0048554,0030198,0030199,0048553,0042417,0060003	4.3473e+39
0	ADAM17	35	32	20	6	35	0030511,0051272,0002467,0010820,0002446,0033025,0030183,0042493,0008284,0032496,0001934,0032722,0045741,0030307,0006508,0006509,0007219,0048870,0048011,0035625,0031659,0033077,0001666,0002690,0030335,0007155,0051088,0006916,0007173,0055099,0032717,0033627
0	PDGFB	34	34	23	8	35	0043536,0050730,0032868,0071506,0042493,0030031,0008284,0045743,0060326,0045740,0001938,0014911,0010544,0010512,0002576,0048661,0014070,0043406,0060445,0001666,0030336,0002548,0009611,0050921,0030168,0032355,0016049,0006929,0030036,0007179,0048008,0048146	60664
0	ILK	34	34	19	4	35	0001658,0090263,0043410,0042327,0008284,0001954,0051291,0045663,0014912,0048812,0043524,0006469,0006468,0045941,0007160,0001558,0007569,0048662,0043406,0009966,0032956,0010667,0030335,0034329,0034446,0050775,0051897,0045197,0007229,0045773,0018105,0043206	8283
0	HTR2B	34	34	26	7	34	0002031,0043123,0071277,0048598,0043066,0071502,0070371,0042493,0014033,0008284,0006182,0001938,0046489,0001755,0016310,0007210,0043406,0051000,0050715,0051209,0050795,0042310,0070528,0003007,0007186,0003300,0019722,0014827,0060548,0014065,0051781,0010507
0	HDAC6	34	33	24	6	35	0051354,0060632,0071218,0090042,0043065,0043162,0032418,0010634,0006886,0007026,0070301,0045861,0070846,0016568,0016236,0009967,0000209,0060765,0034983,0043242,0010870,0090035,0010727,0010033,0070845,0051788,0051789,0006476,0070842,0016575,0070848,0010469	9636
0	F2R	34	34	22	7	36	0045893,0043123,0032967,0051482,0046427,0043280,0043410,0051928,0008285,0008284,0032496,0030168,0045987,0045907,0006919,0006954,0060155,0051281,0007529,0030335,0009611,0043524,0030193,0009653,0030194,0032651,0051930,0000186,0016265,0014068,0007596,0007262	488730002248
0	ADRA2A	34	29	17	4	36	0071883,0071882,0071881,0045955,0007194,0051927,0090303,0042596,0008284,0045741,0030036,0061179,0030818,0007165,0050995,0035625,0043406,0032870,0007186,0030335,0050796,0032811,0046676,0051044,0006928,0010700,0006112,0032148,0001819,0007266,0007596,0007265	425930050892
0	NOD1	33	32	19	6	33	0032760,0043123,0051259,0051403,0051092,0042228,0050830,0034142,0045087,0008063,0006917,0006915,0006952,0046330,0006919,0006954,0007254,0007165,0002755,0002756,0032874,0032755,0023034,0042742,0034134,0034130,0016045,0070374,0009595,0034138,0000187,0042981
0	EREG	33	33	27	6	36	0001525,0009887,0019221,0045089,0043434,0042060,0045840,0008284,0042327,0045741,0045740,0045860,0001550,0007275,0009299,0001556,0007143,0048661,0008285,0042700,0045410,0050680,0030154,0051151,0042108,0009653,0007173,0016481,0030216,0048146,0007267,0051781	4.3616e+18
0	CTGF	33	33	29	7	35	0001525,0001502,0032967,0050867,0060452,0043280,0010942,0043434,0030154,0008284,0016477,0001934,0007229,0030324,0009749,0060401,0007160,0001558,0032355,0014070,0070542,0010628,0044255,0009611,0070318,0010260,0051385,0008543,0034059,0070278,0043200,0006260	15030008544
0	CCNB1	33	33	25	8	37	0033129,0001933,0045931,0000082,0071445,0042493,0051726,0043148,0071174,0031442,0071407,0000075,0001701,0007080,0051987,0001556,0000086,0006461,0071398,0060623,0055015,0051439,0051301,0046680,0051437,0042246,0010629,0071456,0009612,0000278,0031145,0060045	7.283e+24
0	WNT1	32	32	24	2	48	1.658e+220	7.52e+108
0	TACR1	32	31	14	3	35	2.11801e+220	9.582e+17
0	SMAD7	32	31	20	6	33	3.0514e+221	1657
0	SERPINE1	32	30	19	6	33	4.2246e+221	42593
0	PML	32	32	23	6	35	3.0099e+221	1.0332e+18
0	PDGFA	32	32	26	7	36	5.073e+221	4.8839e+25
0	OXTR	32	30	18	5	36	1.696e+220	2.1537e+25
0	NKX2-1	32	31	26	7	41	7.411e+220	2.1983e+60
0	NGF	32	31	20	7	34	4.5786e+221	93140051602
0	GATA6	32	28	23	5	38	4.3065e+221	6.043e+39
0	FOXC1	32	31	26	6	40	1.501e+220	1.503e+52
0	COL1A1	32	32	24	9	36	1.501e+220	6.0351e+25
0	APOB	32	27	25	9	34	4.2632e+221	343830007283
0	WNT7B	31	29	23	7	47	6.071e+214	6.0428e+109
0	UBE2B	31	31	19	4	33	3.3128e+214	94110007283
0	TLR9	31	28	11	3	32	3.276e+214	30277
0	TLR3	31	30	15	4	31	3.276e+214
0	MAPK14	31	31	21	6	31	9.04e+214
0	LRP6	31	31	18	4	35	4.5787e+214	2.1915e+25
0	INHBA	31	29	24	6	36	4.5786e+214	4.0007e+32
0	CST3	31	30	26	6	35	3.1667e+214	5.0896e+25
0	CLN3	31	29	20	7	31	4.3086e+214
0	CHUK	31	31	18	6	34	4.3123e+214	6.0749e+18
0	CDKN1A	31	29	19	4	35	8.629e+213	9.411e+24
1	ATP2B2	31	30	25	8	31	2.1692e+214
0	ADORA1	31	30	20	6	31	1.659e+213
0	TICAM1	30	27	12	3	30	3.1663e+207
1	STAT1	30	29	18	4	30	3.1663e+207
0	SOCS3	30	28	20	4	32	3.2868e+207	103320060674
0	RXRA	30	30	20	4	32	3.328e+207	600380007494
0	PTPN11	30	29	22	5	33	7.411e+206	4.2593e+18
0	PAFAH1B1	30	30	24	10	33	2.1987e+207	8.70022e+15
0	MNAT1	30	30	24	8	33	6.368e+206	8.40008e+15
0	MEN1	30	29	20	3	36	4.5941e+207	6.0135e+39
0	IRAK1	30	29	16	3	30	3.1663e+207
0	IL6R	30	30	16	1	32	2.384e+206	103320031018
1	GJA1	30	30	29	8	30	4.3123e+207
0	F2	30	28	23	8	31	3.2967e+207	8360
0	CYP1A1	30	29	18	4	35	6.805e+206	3.2502e+32
0	CNR1	30	29	20	4	32	4.5759e+207	601350007283
0	AVP	30	28	21	4	31	3.2849e+207	43084
0	SMO	29	29	24	5	34	2.1696e+200	7.389e+31
1	MEF2C	29	29	22	5	29	7.51701e+199
0	KCNMA1	29	29	22	8	30	4.3065e+200	45794
0	IHH	29	29	23	7	34	1.501e+199	6.0135e+32
0	HHEX	29	29	21	5	39	3.0948e+200	3.0878e+67
0	HDAC4	29	26	17	4	30	1.501e+199	14894
1	GRIN2A	29	28	20	9	29	4.2177e+200
0	CEBPA	29	29	23	6	30	3.0099e+200	1892
0	CCND1	29	28	20	6	36	8.20031e+197	1.0165e+46
0	BCL6	29	28	23	6	30	5.0727e+200	7283
0	BCL3	29	29	17	5	31	2.268e+199	102250051457
0	ATM	29	29	16	6	31	1.756e+199	72920010212
0	APOA4	29	27	15	7	29	4.2632e+200
0	ADRB2	29	29	16	4	30	3.1649e+200	45453
0	ABCA1	29	28	21	4	29	4.2632e+200
0	WT1	28	28	21	3	38	1.658e+192	7.53e+66
0	TSC1	28	28	21	5	30	3.2862e+193	18220042552
0	THRA	28	27	25	5	33	2.155e+192	4.8568e+32
0	TH	28	25	16	6	29	4.8596e+193	43473
0	PLA2G4A	28	28	19	6	29	3.328e+193	43129
0	NOG	28	28	15	4	35	1.501e+192	2.1983e+46
0	NFKB1	28	28	19	3	28	4.5941e+193
0	LIG4	28	24	18	8	31	5.1102e+193	1.0165e+18
0	LBP	28	27	14	3	28	3.1663e+193
0	IRS1	28	26	19	3	30	4.3552e+193	425930030879
0	IL12B	28	24	16	6	29	5.0671e+193	10224
0	HRAS	28	27	18	7	28	7.41101e+192
0	FOXF1	28	28	24	5	36	9.79e+192	6.0438e+53
0	FOXC2	28	28	23	4	38	1.501e+192	1.503e+66
0	ERCC3	28	28	18	7	31	6.368e+192	9.65e+17
0	CD36	28	26	19	8	30	4.3123e+193	343830034381
0	BRCA1	28	28	19	5	30	8.502e+193	70590010212
0	BCL10	28	27	20	6	29	4.5893e+193	42221
0	AVPR1A	28	26	18	3	31	3.2849e+193	2.1537e+18
0	APOC3	28	25	14	5	29	4.2632e+193	34382
0	STAT3	27	26	20	6	29	1.659e+185	425930019953
0	SMAD4	27	26	17	3	35	1.658e+185	4.8859e+53
0	RAC1	27	27	22	11	27	7.41101e+185
0	PSMD10	27	27	19	7	29	8.20043e+183	840000216
0	PRKCQ	27	26	23	8	27	7.411e+185
0	PCSK1	27	27	22	5	29	3.1667e+186	219830031016
0	NIPBL	27	26	16	7	31	4.8592e+186	3.4088e+25
0	LIF	27	26	16	2	30	4.8861e+186	6.0135e+18
0	IL1A	27	26	19	2	30	4.3123e+186	1.0332e+18
0	CITED1	27	27	18	4	30	1.658e+185	4.3473e+18
0	ADM	27	27	24	5	29	3.2868e+186	607120048589
0	TP73	26	25	18	5	28	4.5893e+179	101650010332
0	SYK	26	25	18	10	28	4.5401e+179	433660008283
0	RARA	26	26	17	5	26	7.13e+179
0	PRKACA	26	26	23	8	27	8.60043e+176	1707
0	PPARD	26	26	18	8	31	3.1589e+179	4.3616e+32
0	PPARA	26	23	17	4	27	3.2868e+179	8544
0	NODAL	26	26	17	3	35	5.5123e+179	6.0136e+60
0	MAP3K7	26	26	10	2	26	4.3123e+179
0	MAP3K1	26	26	15	4	26	5.1259e+179
0	ITGB3	26	26	18	9	27	7.411e+178	35295
0	IGF1R	26	25	20	6	29	3.2467e+179	3.1017e+18
0	FGFR1	26	26	18	5	30	1.501e+178	6.0484e+25
0	EPO	26	26	21	7	27	4.3249e+179	51602
0	EDN3	26	24	15	4	26	1.755e+178
0	EDN2	26	23	16	4	26	4.2116e+179
0	CDK7	26	23	12	6	29	6.368e+178	8.40008e+15
0	BBS4	26	25	19	6	33	2.1987e+179	5.0896e+46
0	BAX	26	26	12	7	27	6.309e+178	9636
0	ALDOB	26	24	15	5	26	3.2869e+179
0	WNT9B	25	24	18	4	33	1.658e+171	9.798e+52
0	WNT2	25	25	15	3	29	9.0263e+172	9.94801e+24
0	UBE2N	25	25	14	2	25	4.3123e+172
0	SMAD2	25	25	20	6	36	4.5893e+172	7.352e+73
0	SLC11A2	25	24	12	6	25	1.5692e+172
0	RB1	25	24	14	6	29	4.355e+172	5.1318e+25
1	PRKCZ	25	25	20	7	25	3.1584e+172
0	PDGFRA	25	25	20	6	28	9.725e+171	4.8839e+18
0	NR1H2	25	24	16	3	25	4.2632e+172
0	NCKAP1L	25	24	15	6	29	7.0358e+172	4.2221e+25
0	KIT	25	24	21	5	29	6.687e+171	9.314e+24
0	JUP	25	25	16	6	26	4.2307e+172	43588
0	IRAK3	25	25	13	2	25	4.2177e+172
0	IL6ST	25	25	18	3	25	4.8861e+172
0	IL4	25	23	18	3	25	4.3066e+172
0	HSPD1	25	25	15	6	25	2.368e+171
0	HNF1A	25	25	17	6	31	4.5893e+172	3.1018e+39
0	HES1	25	24	18	3	29	2.1558e+172	2.1983e+25
0	GRIN2B	25	23	14	6	25	1.508e+171
0	FXN	25	25	19	7	26	5.1353e+172	19230
0	FASLG	25	24	13	5	25	4.3123e+172
1	ERBB3	25	25	23	6	25	3.2869e+172
0	EIF2AK3	25	22	18	5	27	1.501e+171	15030031018
0	DRD5	25	23	14	4	25	7.19e+171
0	DNAJA3	25	25	19	6	25	4.3124e+172
0	CYP27B1	25	23	18	5	25	3.328e+172
0	CLN8	25	23	17	7	28	1.306e+171	5.0881e+18
0	CDH13	25	25	18	6	26	4.5885e+172	43616
0	CALR	25	25	20	4	26	4.5787e+172	51208
0	AR	25	25	17	7	34	3.2868e+172	6.0736e+60
0	APOC2	25	22	14	6	27	4.2632e+172	343820034384
0	SKI	24	23	17	4	29	3.0514e+165	9.94801e+31
0	PPARGC1A	24	24	15	5	25	1.659e+164	14850
0	PLEK	24	23	16	7	26	3.0866e+165	69040030384
0	P2RX4	24	22	17	5	25	4.5429e+165	1894
0	NOX1	24	24	19	8	24	1.525e+164
0	MSH2	24	22	14	4	30	4.357e+165	1.0165e+39
0	MESP1	24	17	11	3	29	9.0082e+165	3.241e+31
0	MED1	24	23	20	3	26	3.0518e+165	18920060750
0	MAPK8	24	24	12	3	26	5.1403e+165	15030009411
1	MAP1B	24	23	17	1	24	9.79e+164
0	LAMA5	24	24	16	5	26	1.658e+164	19420008283
0	IRS2	24	23	14	4	25	3.2869e+165	30879
0	IL2	24	23	14	4	24	4.6013e+165
0	HIF1A	24	24	19	3	26	3.0949e+165	323640002248
0	FOXA1	24	24	15	5	27	9.79e+164	4.2593e+18
0	CCNE1	24	24	20	6	24	4.5893e+165
0	CCKAR	24	23	14	6	26	1.659e+164	93140031016
0	CAV3	24	23	12	6	26	4.2632e+165	425930046716
0	BRCA2	24	24	18	5	34	4.5931e+165	1.0332e+67
0	AKT2	24	23	13	2	25	4.5429e+165	14850
0	ADORA2B	24	23	15	1	24	7.19e+164
0	ADAM9	24	23	20	7	25	5.1549e+165	50896
0	VEGFC	23	22	19	5	23	4.3536e+158
0	UGT1A1	23	21	14	5	23	4.5939e+158
0	TNFSF11	23	22	14	4	27	4.578e+158	9.314e+24
0	TGFBR2	23	21	19	4	25	1.569e+157	15680060021
0	TCF7L2	23	23	17	4	28	4.357e+158	4.2593e+32
0	TBX3	23	21	16	2	30	1.501e+157	6.0596e+46
0	TAC1	23	22	15	2	25	5.0671e+158	95820007320
0	SRF	23	23	18	5	28	1.569e+157	4.6716e+32
0	SCARB1	23	23	15	8	25	4.2632e+158	19350034384
0	RTN4	23	22	16	5	24	3.0517e+158	14823
0	RPA1	23	22	8	6	26	7.18005e+156	8.4e+15
0	PPT1	23	23	15	6	25	6.309e+157	508030050896
0	PCSK9	23	23	20	6	24	4.2632e+158	1822
0	PCNA	23	23	15	5	25	8.3e+155	840008283
0	PARK2	23	22	17	6	23	7.417e+157
0	NUP62	23	20	15	6	23	4.3123e+158
0	NGFR	23	23	19	5	24	7.411e+157	43588
0	NCBP2	23	23	15	5	23	6.368e+157
0	NCBP1	23	23	12	5	23	6.368e+157
0	HMGB2	23	21	17	5	25	6.325e+157	72830008584
0	GRB2	23	23	17	7	24	7.411e+157	48646
0	GDNF	23	23	15	5	25	7.411e+157	16570001656
0	GATA4	23	22	16	6	27	4.5893e+158	3.5054e+25
0	FGF9	23	23	12	4	27	1.525e+157	6.0484e+25
0	FGF7	23	23	16	8	26	5.1549e+158	8.544e+17
0	ESR2	23	23	16	6	25	4.3065e+158	600680060065
0	EDNRA	23	20	15	4	25	1.569e+157	75850008283
0	DUSP6	23	23	16	5	23	5.1409e+158
0	DRD4	23	20	8	4	23	5.0709e+158
0	DAB2IP	23	23	11	3	23	5.1056e+158
0	CSF1	23	19	16	3	28	3.2946e+158	3.00601e+31
0	CNTF	23	23	16	4	24	4.6427e+158	40007
0	CD24	23	22	20	7	23	4.2632e+158
0	CCL5	23	23	17	6	23	4.8247e+158
0	BGLAP	23	22	18	4	26	1.501e+157	9.629e+17
0	ARRB1	23	23	17	5	24	3.2715e+158	7600
0	ANGPT1	23	23	19	5	23	4.3536e+158
0	ALDH1A2	23	20	15	2	35	4.2573e+158	2.1983e+81
0	AGTR1	23	22	16	2	25	2.03401e+157	18220002018
0	ACVR1	23	23	15	6	26	9.79e+157	7.498e+17
0	ABCG1	23	23	16	6	23	4.2632e+158
0	UBE2C	22	22	11	5	23	4.3687e+151	10458
0	STAR	22	21	14	4	22	3.2869e+151
0	RIPK1	22	21	14	2	22	4.3123e+151
0	RBP4	22	22	19	6	31	9.79e+150	6.0068e+60
0	PTCH1	22	22	17	4	30	9.887e+150	7.389e+52
0	PRKDC	22	21	15	4	23	3.1648e+151	10332
0	PLA2G1B	22	22	13	5	23	3.2869e+151	32637
0	NR1H3	22	21	17	4	22	4.5723e+151
0	NEDD4	22	21	16	6	23	3.2801e+151	44111
0	MT-CYB	22	22	13	5	24	9.408e+150	508960009636
0	MAPKAPK2	22	20	9	2	22	5.1403e+151
0	MAPK11	22	21	8	3	22	5.1403e+151
0	MAP2K2	22	22	8	2	22	7.41101e+150
0	LEP	22	22	18	3	23	9.892e+150	2021
0	IRAK2	22	21	10	1	22	3.1663e+151
0	IKBKG	22	20	9	2	23	4.3123e+151	1782
0	HDAC2	22	22	16	4	22	4.5786e+151
0	GAS1	22	20	13	5	25	7.411e+150	2.1904e+18
0	FURIN	22	22	17	5	25	3.2804e+151	3.2904e+18
0	FOXA2	22	22	16	3	30	4.5941e+151	7.389e+52
1	F3	22	22	17	5	22	6.916e+150
0	EGF	22	21	13	5	23	5.073e+151	60749
0	DDIT3	22	22	18	5	23	3.0968e+151	48568
0	DBH	22	22	14	5	26	4.2711e+151	4.2593e+25
0	CYP1A2	22	21	14	3	22	9.403e+150
0	CDH1	22	22	17	7	24	7.416e+150	219830009636
0	CD4	22	22	18	7	25	4.5234e+151	1.816e+17
0	CD38	22	22	15	3	22	6.0292e+151
0	CALCA	22	20	12	6	24	7.19001e+150	19760001935
0	AXIN2	22	21	19	5	25	9.0244e+151	1.957e+17
0	AQP2	22	21	14	7	23	4.2631e+151	6884
0	ANG	22	22	19	9	23	1.525e+150	42592
0	TNFRSF11A	21	20	13	4	23	8.284e+143	15030060749
0	TLR6	21	19	10	3	21	2.755e+143
0	SRC	21	21	17	7	21	7.411e+143
0	SOCS1	21	19	11	4	21	6.0333e+144
0	SMAD1	21	21	15	5	28	8.285e+143	9.88e+45
0	SLC6A3	21	19	19	7	23	7.62601e+143	76080021984
0	RPS6KA5	21	21	11	3	22	2.755e+143	42221
0	PSMC5	21	17	10	4	23	6.915e+143	840000216
0	PRKCD	21	21	17	6	23	6.0333e+144	326130032615
0	POLR2K	21	21	7	3	21	6.386e+143
0	PEBP1	21	21	19	4	24	4.584e+144	5.1602e+18
0	NRG1	21	19	15	4	23	9.79e+143	308790008283
0	NOTCH2	21	21	15	3	22	8.285e+143	7368
0	NBN	21	19	10	5	23	3.033e+144	18320032508
0	MIF	21	21	13	5	22	5.0731e+144	8283
0	MDM2	21	21	15	8	21	8.284e+143
0	KDR	21	21	15	5	24	8.284e+143	8.36e+17
0	INHA	21	20	15	6	22	1.501e+143	8584
1	HTR2A	21	20	18	5	21	1.659e+143
0	HPRT1	21	16	10	7	22	2.1954e+144	21756
0	HDAC1	21	18	11	3	21	8.285e+143
0	GRIK2	21	19	12	5	21	4.2391e+144
0	GPAM	21	21	17	5	22	9.75e+143	14823
1	GNAQ	21	20	17	4	21	7.507e+143
0	FOXJ1	21	19	14	4	26	9.79e+143	7.389e+31
0	FOSL1	21	21	15	4	22	8.285e+143	9629
0	F7	21	21	14	4	21	6.916e+143
1	CRYAB	21	21	19	5	21	1.666e+143
0	CETP	21	15	10	4	21	4.2632e+144
0	CD3E	21	21	16	3	21	5.0731e+144
0	CCNH	21	18	8	5	23	6.368e+143	840000080
0	CASP8	21	21	15	6	22	7.507e+143	46677
0	BMPR1A	21	21	14	3	38	3.0501e+144	2.1983e+116
0	B4GALT1	21	21	18	8	24	8.285e+143	3.0879e+18
0	APOC1	21	20	11	4	23	3.4369e+144	343820034447
0	ANGPTL3	21	20	13	5	21	4.2632e+144
0	ADRA1A	21	21	16	6	21	8.285e+143
0	VDR	20	20	15	4	21	8.285e+136	50892
0	VAV3	20	20	18	7	20	1.52501e+136
0	UCN	20	20	12	4	20	4.5776e+137
0	TGFBR3	20	19	16	6	22	3.4699e+137	600380060021
0	TERF1	20	18	12	4	20	4.584e+137
0	TDGF1	20	20	12	3	22	7.507e+136	85950030879
0	SPN	20	20	16	5	20	7.162e+136
0	SLC8A1	20	17	12	6	20	6.811e+136
0	PSMD9	20	20	15	6	22	4.5941e+137	840000216
0	PRKACB	20	20	15	6	20	1.9433e+137
0	POLR2H	20	18	6	3	20	6.386e+136
0	OSM	20	18	17	5	21	8.285e+136	8283
0	MALT1	20	20	16	6	20	1.92301e+136
0	JAG2	20	20	19	5	23	1.501e+136	7.283e+17
0	ITCH	20	20	11	4	20	9.615e+136
0	ID1	20	20	17	5	21	7.507e+136	46677
0	HMGB1	20	19	15	5	20	6.31e+136
0	GSK3B	20	20	17	4	20	7.411e+136
0	GNAS	20	20	16	7	23	9.79101e+136	5.1216e+18
0	GLRA1	20	18	11	5	20	4.2391e+137
0	GIP	20	19	14	5	20	4.2493e+137
0	GHSR	20	19	15	4	20	9.755e+136
0	FOXS1	20	20	12	3	21	6.916e+136	1568
0	FOXD4	20	19	14	3	23	9.79e+136	7.38901e+17
0	ENPP1	20	20	17	6	21	4.5719e+137	46849
0	DUSP3	20	18	10	3	20	2.755e+136
0	CRYAA	20	20	18	6	22	7.20007e+134	508960070141
0	CLU	20	20	17	7	21	8.284e+136	31018
0	CHD7	20	20	13	4	27	1.501e+136	1.56801e+45
0	CD44	20	20	16	6	21	6.0333e+137	34238
0	CARTPT	20	19	15	3	20	3.2099e+137
0	BTRC	20	19	14	7	21	3.1648e+137	33598
0	BLM	20	18	11	2	22	4.5941e+137	101650000085
0	ALS2	20	20	16	9	20	7.626e+136
0	AGTR2	20	19	15	3	21	7.199e+136	1974
0	YWHAB	19	19	12	6	19	3.5308e+130
0	VHL	19	19	19	6	19	8.285e+129
0	VEGFB	19	19	15	4	20	5.0731e+130	60976
0	TRAF2	19	19	8	4	19	3.3209e+130
0	TAF1	19	19	15	7	20	6.368e+129	80
0	TAB1	19	18	9	2	19	2.755e+129
0	SPRY2	19	19	13	4	20	8.285e+129	60437
0	SORT1	19	19	14	4	20	8.333e+129	1503
0	SLC1A3	19	18	16	7	21	4.349e+130	94160046677
0	RPS6KA3	19	18	9	3	19	1.501e+129
0	PSMB8	19	15	12	4	21	4.4419e+130	840000216
0	PRKCI	19	18	14	8	19	6.916e+129
0	PLCE1	19	18	13	4	20	7.507e+129	8283
0	PIK3R1	19	19	11	5	19	4.4419e+130
0	OSR1	19	16	13	2	32	7.50701e+129	7.2169e+88
0	NPM1	19	18	15	7	19	8.285e+129
0	NKX2-2	19	19	13	2	21	3.323e+129	310180048565
0	MYH9	19	19	11	7	23	3.2796e+130	7.132e+24
0	MLXIPL	19	18	12	3	20	4.6889e+130	42593
0	MKKS	19	17	15	6	25	7.507e+129	5.0896e+39
0	MEF2A	19	19	10	3	19	2.755e+129
0	MAPK7	19	19	12	6	19	2.755e+129
0	MAP2K6	19	19	11	4	19	2.755e+129
0	LRP5	19	19	17	4	20	4.584e+130	60612
0	LIG1	19	17	4	4	20	6.31e+129	84
0	LCK	19	19	15	6	19	4.2493e+130
0	KRAS	19	18	9	4	19	4.3406e+130
0	JUNB	19	19	15	3	24	3.287e+130	3.3687e+32
0	JMJD6	19	18	16	6	22	7.507e+129	1.822e+17
0	JAG1	19	18	14	4	20	4.5747e+130	48839
0	INPP5D	19	17	14	5	20	8.285e+129	8340
0	HIPK2	19	17	13	4	21	8.284e+129	508820009952
0	HDAC3	19	18	15	5	19	4.6329e+130
0	GTF2H1	19	16	7	3	19	6.368e+129
0	FZD7	19	19	15	4	19	7.13e+130
0	FOXO3	19	19	16	5	22	9.79e+129	7.389e+17
0	FOXD1	19	18	12	3	24	9.79e+129	7.38901e+31
1	FGF1	19	19	16	3	19	1.525e+129
0	ESR1	19	18	15	2	24	6.0527e+130	6.075e+32
0	EPAS1	19	19	16	5	22	2.027e+129	1.974e+17
0	DLC1	19	19	16	4	20	8.285e+129	8360
0	CHRNA4	19	18	11	5	20	4.2391e+130	50877
1	CALM3	19	18	16	8	19	4.6209e+130
0	CACNB4	19	19	15	7	20	7.411e+129	19227
0	BMP10	19	17	13	4	21	6.0045e+130	600380040007
0	BDNF	19	19	15	6	21	7.411e+129	488390001657
0	BCL2L1	19	18	13	6	23	8.284e+129	9.314e+24
0	AZU1	19	19	14	5	19	6.50801e+129
0	ATP2A1	19	18	11	9	20	5.5085e+130	51659
0	ATP1A2	19	18	8	5	19	2.026e+129
0	ATF1	19	19	12	4	19	2.75501e+129
0	APOA5	19	18	11	6	19	4.2632e+130
0	ALOX12	19	18	16	4	19	4.3065e+130
0	WRN	18	17	13	3	19	6.31e+122	10225
0	WNT5B	18	17	15	4	21	7.13e+123	3.1018e+18
0	VCAM1	18	17	12	5	20	7.50701e+122	102120022614
0	TTN	18	16	13	7	18	3.0049e+123
0	TAB2	18	16	5	2	18	7.507e+122
0	SP100	18	15	9	2	18	6.0333e+123
0	SOX9	18	18	14	3	23	7.507e+122	1.91e+32
0	SFRP5	18	18	16	5	18	8.285e+122
0	RPA2	18	17	5	5	20	6.31e+122	840000216
0	ROBO1	18	18	11	5	20	8.285e+122	607630021510
0	RARG	18	17	13	3	23	8.285e+122	6.0429e+32
0	PTPN6	18	17	14	5	18	6.0333e+123
0	PTGS1	18	16	12	4	18	1.0243e+123
0	PSMD14	18	18	13	6	20	6.915e+122	840000216
0	PSMC2	18	15	11	5	20	4.4419e+123	840000216
0	PSMB6	18	15	11	4	20	4.4419e+123	840000216
0	PSMB5	18	15	11	4	20	4.4419e+123	840000216
0	PSMB4	18	18	13	6	20	4.4419e+123	840000216
0	PSMB10	18	15	12	4	20	6.959e+122	840000216
0	PSMA7	18	15	11	4	20	4.4419e+123	840000216
0	PSMA4	18	15	11	4	20	4.4419e+123	840000216
0	PSMA3	18	15	11	4	20	4.4419e+123	840000216
0	PSMA2	18	15	11	3	20	6.915e+122	840000216
0	PRKAG2	18	16	12	3	18	6.112e+122
0	PPP2R1A	18	18	16	5	19	8.60007e+120	7059
0	PPP2CA	18	18	13	3	19	6.917e+122	7498
0	POLR2L	18	18	8	3	18	6.386e+122
0	PIK3CB	18	18	14	6	18	8.286e+122
0	PIK3CA	18	18	12	4	18	4.3491e+123
0	PDPN	18	18	16	7	21	9.79e+122	8.36e+17
0	P2RX1	18	18	16	9	20	3.3198e+123	508960007320
0	NTF3	18	18	15	4	20	7.411e+122	85440042552
0	NRP1	18	18	16	5	18	7.507e+122
0	NKX2-3	18	18	13	3	21	1.6333e+123	1.776e+17
0	MGEA5	18	18	15	6	18	7.0265e+123
1	MAPK9	18	18	11	2	18	2.755e+122
0	KAT2B	18	18	12	6	18	8.285e+122
0	INPPL1	18	18	15	6	18	8.285e+122
0	IL12A	18	16	10	3	19	1.6477e+123	10224
0	IKZF1	18	18	12	4	21	4.5941e+123	7.498e+17
0	IFNB1	18	17	12	3	18	8.285e+122
0	HOXA5	18	18	12	4	27	6.0441e+123	7.389e+59
0	GTF2H2	18	17	8	3	19	6.368e+122	9411
0	GOT1	18	13	8	3	18	6.536e+122
0	GHRHR	18	18	12	4	22	8.284e+122	8.34e+24
0	GCLC	18	18	13	3	19	1.9852e+123	9410
0	FZD4	18	18	15	5	18	7.13e+123
0	FOXO4	18	18	14	5	21	8.285e+122	7.389e+17
0	FOXG1	18	18	14	3	20	2.1954e+123	98880009953
0	FOXD4L6	18	17	12	3	21	9.79e+122	7.38901e+17
0	FOXD4L5	18	17	12	3	21	9.79e+122	7.38901e+17
0	FOXD4L4	18	17	12	3	21	9.79e+122	7.38901e+17
0	FOXD4L2	18	17	12	3	21	9.79e+122	7.38901e+17
0	FOXD4L1	18	17	12	3	21	9.79e+122	7.38901e+17
0	FOXD2	18	17	12	3	21	9.79e+122	7.38901e+17
1	FKBP1A	18	18	15	5	18	3.007e+122
0	FADS1	18	16	11	5	18	3.3189e+123
0	ELANE	18	16	13	4	19	4.3406e+123	9411
0	CXCL10	18	18	13	6	19	8.284e+122	10332
0	CPS1	18	18	14	4	18	5.5081e+123
0	CDK2	18	18	13	6	21	4.5941e+123	8.5e+15
0	CD86	18	18	12	5	18	4.5941e+123
0	CASP1	18	16	13	4	19	6.91701e+122	7520
0	BMPR2	18	18	12	2	21	3.0501e+123	1.707e+17
0	BCL2L11	18	18	11	4	25	6.917e+122	3.0879e+46
0	ANGPT2	18	18	16	4	21	4.3537e+123	6.0135e+18
0	ADRBK1	18	17	13	5	18	7.507e+122
0	ADNP	18	18	14	3	19	5.1965e+123	33484
0	ADAM10	18	18	15	6	18	8.284e+122
0	ACVR2B	18	18	13	4	26	7.507e+122	7.389e+52
0	XRCC4	17	16	9	4	19	4.519e+116	101650010332
0	WNT8A	17	17	13	3	28	4.2074e+116	6.0021e+74
0	WNT3	17	17	11	2	27	7.13e+116	9.88e+66
0	VCP	17	16	8	4	17	4.5732e+116
0	TRIB3	17	17	13	4	17	6.915e+115
0	TPM1	17	17	12	6	17	3.1529e+116
0	SELP	17	16	11	7	17	2.576e+115
0	RYR2	17	15	10	3	18	6.81101e+115	51775
0	RPS6KA2	17	16	8	2	17	2.755e+115
0	RPS6KA1	17	16	8	2	17	2.755e+115
0	RPA3	17	17	5	5	19	6.31e+115	840000216
0	PVRL2	17	15	9	4	17	4.4419e+116
0	PSMC6	17	14	10	4	19	6.915e+115	840000216
0	PSMC4	17	14	11	4	20	6.915e+115	1.824e+17
0	PSMC3	17	14	11	5	20	4.4419e+116	1.824e+17
0	PSMB9	17	14	11	4	20	4.4419e+116	8.4e+15
0	PSMB7	17	14	11	4	19	4.4419e+116	840000216
0	PSMB3	17	14	11	4	19	4.4419e+116	840000216
0	PSMB2	17	14	11	4	19	4.4419e+116	840000216
0	PSMB1	17	14	11	4	19	4.4419e+116	840000216
0	PSMA6	17	14	10	3	19	6.915e+115	840000216
0	PSMA5	17	14	10	3	19	6.915e+115	840000216
0	PSMA1	17	14	10	3	19	6.915e+115	840000216
0	PRKAR2B	17	17	14	7	17	6.112e+115
0	PRKACG	17	17	13	5	19	1.9433e+116	72830008584
0	POLR2E	17	16	7	4	17	6.386e+115
0	PBX1	17	17	11	3	20	6.694e+115	9.954e+17
0	P2RY2	17	17	15	5	17	9.79001e+115
0	P2RX3	17	16	15	6	19	1.0524e+116	509090050896
0	NPPC	17	17	16	4	20	8.285e+115	1.503e+17
0	NMUR2	17	17	11	4	17	7.625e+115
0	NME1	17	15	11	4	17	8.285e+115
0	NCF1	17	13	8	6	18	6.61201e+115	8283
0	MYH6	17	17	10	3	17	2.027e+115
0	MYD88	17	17	10	2	17	2.755e+115
0	LRP2	17	17	10	4	19	4.2493e+116	101650008283
0	L1CAM	17	17	11	6	17	7.411e+115
0	ITGB1	17	17	11	5	17	7.411e+115
0	IL18	17	13	12	5	17	4.2104e+116
0	ID2	17	17	16	3	19	7.507e+115	31660033598
0	ICAM1	17	17	14	4	19	6.0333e+116	24570022614
0	HRH3	17	16	10	3	17	7.613e+115
0	HEXB	17	17	15	7	21	1.501e+115	1.9953e+25
0	HDAC9	17	13	8	4	17	7.507e+115
0	HDAC5	17	17	8	5	17	6.325e+115
0	GTF2H4	17	14	6	3	17	6.368e+115
0	GTF2H3	17	14	6	3	17	6.368e+115
0	GOT2	17	12	9	3	17	6.536e+115
0	FZD1	17	17	13	3	17	4.5941e+116
0	FOXM1	17	17	15	4	19	9.79e+115	73890009888
0	FNTA	17	15	15	4	17	8.284e+115
0	FLNA	17	17	13	6	17	4.5184e+116
0	ECE1	17	15	11	5	17	7.50701e+115
0	DLD	17	17	13	3	17	4.2391e+116
1	CRH	17	16	11	4	17	1.0841e+116
0	COMT	17	17	14	5	18	4.2493e+116	48609
0	CHRNA3	17	17	12	5	17	7.507e+115
0	CDKN1B	17	17	11	6	19	8.285e+115	840000080
0	CDH2	17	17	9	5	17	1.6477e+116
0	BCAR1	17	15	12	5	18	1.6477e+116	8283
0	AQP9	17	15	12	3	18	1.5722e+116	30104
0	ALDH5A1	17	17	12	4	17	6.536e+115
0	ADRA1B	17	15	11	5	21	7.626e+115	4.2593e+25
0	ACVRL1	17	15	14	5	17	8.285e+115
0	ZBTB16	16	16	13	5	19	8.285e+108	9.952e+17
1	WWTR1	16	15	12	3	16	8.284e+108
0	WNT9A	16	15	12	3	20	8.285e+108	9.798e+24
0	WNT8B	16	16	12	2	22	7.13e+109	2.1854e+39
0	UBE2V1	16	16	7	2	16	2.75501e+108
0	UBE2E1	16	15	7	3	16	4.3687e+109
1	TXNIP	16	15	12	4	16	6.606e+108
0	TLR7	16	15	7	2	17	3.4154e+109	42221
0	TFRC	16	16	12	6	16	4.4419e+109
0	TFAP4	16	15	8	3	16	8.285e+108
0	TBX5	16	14	9	3	21	7.507e+108	7.389e+31
0	SUPT5H	16	16	12	7	16	6.368e+108
0	SMURF1	16	15	10	5	17	6.611e+108	7398
0	SLIT3	16	16	14	3	18	8.285e+108	215100021834
0	SLC27A1	16	13	8	4	16	3.1652e+109
0	SHROOM2	16	15	14	6	16	4.8593e+109
0	ROR2	16	16	15	4	16	8.285e+108
1	RAN	16	16	10	7	16	6.611e+108
0	RAF1	16	15	11	2	17	8.285e+108	8283
0	RAB3A	16	16	11	5	18	1.6079e+109	516020003016
0	PSMF1	16	13	10	3	18	6.915e+108	840000216
0	PSME3	16	13	11	3	18	6.915e+108	840000216
0	PSMD8	16	13	10	3	18	6.915e+108	840000216
0	PSMD6	16	13	10	3	18	6.915e+108	840000216
0	PSMD5	16	16	13	6	18	6.915e+108	840000216
0	PSMD3	16	13	10	3	18	6.915e+108	840000216
0	PSMD2	16	13	10	3	18	6.915e+108	840000216
0	PSMD1	16	13	10	3	18	6.915e+108	840000216
0	PSMC1	16	13	10	4	18	6.915e+108	840000216
0	PRDX2	16	15	14	3	17	4.5581e+109	48872
0	POU5F1	16	15	13	3	16	3.2569e+109
0	POLR2F	16	15	6	3	16	6.386e+108
0	POLA1	16	14	10	4	19	4.4419e+109	8.4e+15
0	PMCH	16	16	11	4	18	2.027e+108	425930007283
0	PLK1	16	15	10	5	24	3.1648e+109	8.283e+52
0	PLD2	16	16	13	4	16	2.031e+108
0	PLCG2	16	16	14	6	16	3.3198e+109
0	PF4	16	16	10	4	16	4.5651e+109
0	PEX5	16	16	11	7	16	7.03101e+108
0	PAK2	16	16	11	5	16	7.411e+108
0	P2RY1	16	16	14	5	16	7.42e+108
0	OVOL2	16	16	12	3	19	7.507e+108	6.0214e+18
0	OPRM1	16	16	11	1	17	8.285e+108	7600
0	NR0B1	16	16	13	5	22	1.0033e+109	2.1983e+39
0	NPR1	16	14	12	3	16	5.088e+109
0	NFKB2	16	16	10	4	16	2.755e+108
0	NF2	16	14	11	3	19	8.285e+108	1.707e+17
0	NEUROD1	16	16	15	2	20	4.8562e+109	4.2593e+25
0	NDEL1	16	15	13	7	20	6.0052e+109	8.70007e+22
0	NDE1	16	14	11	6	18	7.02e+108	870000236
0	MYO6	16	16	14	6	16	3.0048e+109
0	MSX1	16	16	11	3	19	8.285e+108	5.1216e+18
0	MMP14	16	16	13	6	19	9.725e+108	1.503e+17
0	MEG3	16	16	11	5	16	8.285e+108
0	MAPKAPK3	16	16	5	2	16	2.755e+108
0	KITLG	16	16	12	5	18	3.5234e+109	82830008584
0	ITPR1	16	16	14	8	17	9.79101e+108	50882
0	IRF4	16	16	9	4	16	6.0333e+109
0	INHBB	16	15	13	4	17	4.6882e+109	40007
0	ING4	16	13	10	4	16	8.285e+108
0	IL8	16	16	14	4	16	8.285e+108
0	GSK3A	16	16	13	5	16	5.1348e+109
0	GNAI2	16	16	11	3	16	8.284e+108
0	GIMAP5	16	15	10	3	17	1.659e+108	43029
0	GAA	16	15	10	6	19	7.626e+108	4.3181e+18
0	FYN	16	16	11	6	16	7.411e+108
0	FOXP2	16	16	11	3	21	9.79e+108	7.389e+31
0	FLT1	16	16	13	4	16	1.86001e+107
0	FGF4	16	16	14	4	17	8.28401e+108	10463
0	EYA1	16	16	12	4	22	4.5664e+109	7.389e+38
0	ERBB4	16	16	16	4	20	7.507e+108	2.1537e+25
0	EPHB2	16	15	9	3	16	7.411e+108
0	EIF2B5	16	14	13	4	18	4.5948e+109	425520006413
0	EGR1	16	16	15	2	16	4.5941e+109
0	EDNRB	16	15	12	4	17	6.885e+108	7497
0	CX3CL1	16	16	12	5	16	3.0595e+109
0	CORO1A	16	16	12	6	19	3.2796e+109	4.3029e+18
0	CITED2	16	16	9	3	18	7.507e+108	73680008283
0	CFTR	16	16	12	5	17	6.811e+108	7585
0	CFL1	16	16	13	8	17	7.411e+108	910
0	CAT	16	15	9	3	17	6.195e+108	9650
0	CASP6	16	16	11	6	17	6.917e+108	10332
0	CARD9	16	13	6	2	16	3.2495e+109
0	C5	16	16	12	4	16	4.5087e+109
0	BDKRB2	16	16	14	3	16	8.285e+108
0	ARRB2	16	15	12	4	17	2.031e+108	7600
0	APOBEC1	16	16	13	4	17	1.6556e+109	10332
0	AKAP5	16	16	12	7	20	2.1766e+109	6.0135e+25
0	ADCY5	16	15	11	6	16	7.626e+108
0	ACVR1B	16	15	12	4	18	9.79e+108	19420046545
0	ACSL6	16	16	11	6	17	1.0976e+109	9629
0	ZEB1	15	14	7	3	18	8.285e+101	7.38901e+17
0	VTN	15	15	13	4	15	5.0731e+102
0	UTS2R	15	13	10	4	15	4.6005e+102
0	UCP3	15	15	11	4	17	1.666e+101	75850014823
0	UBE2D3	15	14	7	3	15	4.3161e+102
0	UBE2D1	15	10	6	2	15	4.3687e+102
0	TYMS	15	13	9	4	15	6.20601e+101
0	TXN	15	15	12	5	17	5.5086e+102	93140008283
0	TSG101	15	15	15	8	15	8.285e+101
0	TNFRSF1A	15	15	10	5	15	4.4419e+102
0	TGFB1I1	15	14	12	4	15	8.285e+101
0	TERF2	15	12	7	4	15	9.0398e+102
0	TAF9	15	15	12	4	15	6.368e+101
1	SST	15	14	11	4	15	8.285e+101
0	SP3	15	14	8	2	18	3.0219e+102	1.50301e+17
0	SOX6	15	15	11	2	16	9.791e+101	51216
0	SOX18	15	14	13	3	19	3.151e+101	2.2405e+25
0	SOS1	15	13	9	2	15	7.41101e+101
0	SNAP25	15	13	7	5	16	1.4047e+102	16081
0	SLIT1	15	15	9	4	17	7.411e+101	215100021834
0	SLC6A1	15	15	12	5	16	5.1939e+102	9636
0	SLC1A2	15	14	11	4	17	5.1938e+102	215370035264
0	SFRP4	15	15	13	2	15	8.28501e+101
0	RUNX2	15	15	12	2	17	1.501e+101	15030001958
0	RHOB	15	15	13	6	15	7.41101e+101
0	RASGRF1	15	14	11	5	16	5.1056e+102	8283
0	PTH	15	15	12	4	16	1.501e+101	45453
0	PSME4	15	13	12	4	18	6.915e+101	8.4e+15
0	PSME2	15	12	10	3	17	6.915e+101	840000216
0	PSME1	15	12	10	3	17	6.915e+101	840000216
0	PSMD7	15	12	10	3	17	6.915e+101	840000216
0	PSMD4	15	12	10	3	17	6.915e+101	840000216
0	PSMD13	15	12	10	3	17	6.915e+101	840000216
0	PSMD12	15	12	10	3	17	6.915e+101	840000216
0	PSMD11	15	12	10	3	17	6.915e+101	840000216
0	PSMA8	15	13	10	3	17	6.915e+101	840000216
0	PRTFDC1	15	11	9	6	16	2.1954e+102	21756
0	PRKAR1B	15	15	12	5	15	6.112e+101
0	PRKAA2	15	14	11	5	16	4.2304e+102	14823
0	PRDX3	15	13	9	4	16	8.284e+101	1893
0	PNP	15	14	6	4	15	5.5086e+102
0	PLG	15	13	13	7	18	8.285e+101	4.6716e+18
0	PLCG1	15	15	11	4	15	4.3536e+102
0	PLAU	15	15	13	5	15	3.3628e+102
0	PGF	15	15	14	3	15	8.284e+101
0	PFKFB1	15	15	8	4	15	3.11e+102
0	PELI1	15	14	9	2	15	2.755e+101
0	PDPK1	15	15	11	6	15	3.1295e+102
0	PDE5A	15	14	13	5	15	1.666e+101
0	PABPN1	15	13	7	4	15	6.369e+101
0	NTRK1	15	15	8	3	15	7.169e+101
0	NR2F2	15	15	13	4	19	4.5941e+102	9.956e+24
0	NOTCH4	15	15	13	3	16	9.79e+101	30879
0	NDFIP1	15	14	9	2	15	4.3123e+102
0	LYN	15	15	12	4	15	7.165e+101
0	LPL	15	13	8	4	15	6.629e+101
0	LCAT	15	12	8	5	15	4.2632e+102
0	ITPR3	15	14	11	6	18	5.5085e+102	5.0913e+18
0	ITGAL	15	15	11	3	15	4.2102e+102
0	ITGA5	15	15	10	7	15	7.411e+101
0	IKBKB	15	15	5	1	15	2.755e+101
0	HTR1B	15	14	12	4	15	4.2493e+102
0	HSPA5	15	15	11	6	17	6.916e+101	216800021589
0	HNF4A	15	15	12	2	16	8.285e+101	31018
0	HNF1B	15	15	12	3	25	7.2095e+102	6.0429e+67
0	GNAO1	15	14	12	5	16	7.626e+101	9987
0	GCH1	15	15	8	6	15	6.184e+101
0	GAS6	15	15	14	7	16	2.57601e+101	8283
0	GAL	15	14	12	4	15	8.28501e+101
0	FRZB	15	15	12	2	16	1.4033e+102	61053
0	FRS2	15	15	9	4	18	6.0527e+102	8.595e+17
0	FOXP1	15	14	9	2	16	9.79e+101	7389
0	FOXL2	15	15	12	3	17	6.917e+101	73890019101
0	FOXE3	15	15	11	3	19	6.355e+101	7.38901e+24
0	FOXD3	15	14	9	3	19	1.658e+101	7.38901e+24
0	FGF23	15	14	9	3	15	5.5062e+102
0	FBXO5	15	14	10	6	18	7.34601e+101	8.70007e+15
0	ELK1	15	15	5	2	15	2.755e+101
0	DVL2	15	14	10	4	16	7.507e+101	7379
0	DUSP4	15	14	6	2	15	2.755e+101
0	DLX2	15	15	14	2	18	2.1766e+102	9.95401e+17
0	CYP11A1	15	15	10	3	15	2.1549e+102
0	CTSB	15	15	13	4	15	6.91401e+101
0	COL4A3BP	15	15	13	6	16	3.007e+101	8283
0	CENPE	15	13	11	6	18	4.5184e+102	8.7e+15
0	CDKN2B	15	15	11	5	16	8.285e+101	80
0	CDK5R1	15	15	13	7	16	4.5664e+102	8283
0	CDC23	15	14	6	5	17	5.1437e+102	70910000080
0	CD74	15	15	11	5	18	5.0731e+102	1.9883e+18
0	CD40LG	15	13	8	4	15	5.1023e+102
0	CCND2	15	15	7	5	16	4.5664e+102	7283
0	CCKBR	15	15	12	6	17	8.284e+101	76000008283
0	CCK	15	15	14	4	15	3.2099e+102
0	CADM1	15	14	10	7	18	6.915e+101	1.913e+17
0	BUB1B	15	14	10	7	18	6.915e+101	8.70008e+15
0	BNIP3	15	15	11	6	15	6.917e+101
0	BAT3	15	14	12	7	17	9.79e+101	72830001822
0	ASS1	15	15	9	3	16	7.584e+101	1822
0	ASNS	15	15	9	4	17	3.4641e+102	94160009636
0	ARNT	15	15	12	3	16	4.5944e+102	1892
0	ARHGEF2	15	15	13	6	15	5.1056e+102
0	ARHGEF11	15	15	13	6	16	7.41101e+101	910
0	APOH	15	13	11	4	15	3.4197e+102
0	ANAPC2	15	15	7	4	15	5.1437e+102
0	ADCY8	15	12	10	6	15	7.18901e+101
0	ACE	15	14	12	7	17	3.2943e+102	19740001822
0	ABL1	15	15	15	6	15	7.411e+101
0	ZAP70	14	12	8	4	15	4.5059e+95	43366
0	WNT6	14	14	9	3	18	7.13e+95	9.79801e+24
0	WNT2B	14	13	10	2	20	7.22301e+94	2.1871e+39
0	VLDLR	14	14	11	5	15	3.2496e+95	34447
0	VCL	14	14	10	9	14	3.0032e+95
0	VAV2	14	14	12	5	14	7.41101e+94
0	TWIST1	14	14	11	4	14	1.501e+94
0	TRH	14	14	10	3	14	9.755e+94
0	TNKS	14	11	9	6	14	5.5085e+95
0	TIMELESS	14	14	12	7	17	3.3261e+95	9.628e+17
0	TBK1	14	13	6	3	14	4.4419e+95
0	TAB3	14	12	4	1	14	2.755e+94
0	STK11	14	14	12	4	15	8.285e+94	1894
0	SQSTM1	14	13	11	7	14	6.916e+94
0	SP1	14	14	7	2	17	3.0219e+95	1.50301e+17
0	SOX17	14	14	13	2	17	6.0913e+95	6.0214e+18
0	SMC1A	14	13	7	5	18	7.00033e+92	8.70009e+22
0	SIRT2	14	12	9	4	15	4.5843e+95	51775
0	SHC1	14	14	9	3	14	7.176e+94
0	SELE	14	13	10	4	15	3.2496e+95	30029
0	RPS19	14	14	11	7	16	3.0218e+95	488560031018
0	ROBO2	14	14	12	6	16	7.411e+94	16570001656
0	RDH10	14	14	8	2	17	1.4032e+95	6.0449e+18
0	RARB	14	13	10	3	16	8.28501e+94	217560001657
0	PTPRK	14	14	13	7	14	8.285e+94
0	PSMB11	14	12	10	3	16	6.915e+94	840000216
0	PRKCG	14	14	12	8	14	4.2177e+95
1	PRKCB	14	14	11	5	14	3.4339e+95
0	PRKAR2A	14	14	11	6	14	6.112e+94
0	POLR2G	14	13	6	3	14	6.368e+94
0	POLR2D	14	13	6	3	14	6.368e+94
0	POLR2A	14	13	6	3	14	6.368e+94
0	PLEKHA1	14	13	12	5	17	9.791e+94	7.28301e+17
0	PLAT	14	14	13	5	14	1.666e+94
0	PIK3R2	14	14	10	3	14	5.1056e+95
0	PDRO	14	14	10	6	14	4.2632e+95
0	PCSK5	14	14	11	6	18	7.507e+94	1.822e+24
0	ONECUT1	14	14	10	3	16	9.653e+94	74920031018
0	NUP98	14	14	12	7	16	4.4419e+95	870000236
0	NOS2	14	13	11	4	14	3.0168e+95
0	NCOA6	14	13	9	3	15	7.507e+94	60716
0	MYOD1	14	14	11	3	14	7.517e+94
0	MYO7A	14	14	11	6	16	3.0048e+95	508960050957
0	MAPK10	14	13	6	1	14	2.755e+94
0	MAP2K7	14	13	5	1	14	2.755e+94
0	MAP2K3	14	13	5	1	14	2.755e+94
0	MAEL	14	14	11	5	16	7.129e+94	72830007128
0	LY96	14	14	13	3	14	2.755e+94
0	LEPR	14	14	14	4	15	3.1669e+95	42221
0	LDLR	14	12	8	5	15	4.2632e+95	34383
0	LATS1	14	13	10	5	14	9.755e+94
0	KAT2A	14	13	9	4	19	4.4419e+95	2.1537e+32
0	ITGA6	14	13	10	5	14	7.044e+94
0	IRF8	14	14	9	4	14	6.0333e+95
0	IGFBP2	14	14	10	4	14	4.2493e+95
0	IFT88	14	14	8	3	19	3.003e+95	4.8568e+32
0	ID3	14	14	10	3	16	7.507e+94	309030001656
0	HOXA13	14	14	14	2	18	4.584e+95	4.8839e+25
0	HINFP	14	14	9	3	14	4.5941e+95
0	GREM1	14	14	11	4	15	1.658e+94	9954
0	GNA13	14	14	11	4	15	1.569e+94	8360
0	GLRB	14	14	11	6	14	4.2391e+95
0	GIPR	14	14	12	3	14	7.189e+94
0	GHRH	14	13	9	2	15	4.5941e+95	21984
0	GH1	14	11	7	2	14	4.3406e+95
0	GDF7	14	14	9	3	19	4.5941e+95	3.0901e+32
0	GABBR1	14	12	9	3	14	8.28501e+94
0	G6PD	14	11	8	4	15	6.098e+94	1816
0	G6PC	14	13	8	3	16	4.2632e+95	425930035264
0	FOXA3	14	14	13	4	18	8.285e+94	2.1999e+25
0	FKBP1B	14	13	9	5	16	4.2026e+95	517750019227
0	EPB41L5	14	14	10	4	20	6.931e+94	7.492e+38
0	EIF5A	14	13	9	3	14	6.452e+94
0	EGR2	14	14	12	4	19	3.2569e+95	2.1569e+32
0	DVL1	14	12	11	4	15	3.4504e+95	21915
0	DUSP7	14	14	8	3	14	2.755e+94
0	DHCR24	14	14	12	5	17	8.285e+94	9.888e+17
0	CYP3A4	14	13	8	4	14	7.0989e+95
0	CYP2D6	14	12	8	3	14	7.0989e+95
0	CUL3	14	14	11	5	17	3.5024e+95	9.1e+16
0	CUL1	14	14	9	6	15	8.285e+94	84
0	CREBBP	14	14	12	5	16	3.3261e+95	425920008283
0	CPT1A	14	13	10	5	14	4.632e+95
0	COL3A1	14	14	13	7	18	7.507e+94	9.314e+24
0	COL2A1	14	14	10	7	20	1.501e+94	1.894e+38
0	CLEC7A	14	14	11	4	14	9.756e+94
0	CENPF	14	14	13	8	19	1.6202e+95	8.70007e+29
0	CDK6	14	14	14	6	15	1.954e+94	80
0	CDC42	14	14	12	4	14	7.41101e+94
0	CCL11	14	14	14	5	16	6.93501e+94	93140060763
0	CARD11	14	12	5	2	14	4.558e+95
0	CAMP	14	13	7	3	14	8.28401e+94
0	C3	14	13	10	1	14	4.5087e+95
0	BRAF	14	14	11	6	14	6.916e+94
0	BIRC2	14	14	11	6	14	6.915e+94
0	ATR	14	13	10	5	14	9.0399e+95
0	AMOT	14	14	11	3	14	4.3536e+95
0	ALDOC	14	12	8	5	14	6.91501e+94
0	ALDH2	14	14	11	4	14	6.06601e+94
0	ALB	14	14	13	5	15	1.5721e+95	51659
0	AIMP1	14	14	11	8	14	1.525e+94
0	ADCY1	14	14	11	7	14	7.18901e+94
0	ACSL5	14	14	9	4	14	9.744e+94
0	ACHE	14	13	12	7	15	7.517e+94	8283
0	ACE2	14	14	12	5	14	4.4419e+95
0	ABAT	14	14	10	5	14	7.626e+94
0	AATF	14	13	12	5	14	4.5941e+95
0	AANAT	14	14	9	3	15	3.0187e+95	9416
0	ZW10	13	12	7	5	15	7.00035e+85	870000236
1	ZEB2	13	13	11	4	13	2.1766e+88
0	XRCC6	13	12	5	3	14	1.9059e+88	10212
0	WNT16	13	12	9	2	17	7.22301e+87	9.798e+24
0	VANGL2	13	13	12	5	13	4.8103e+88
0	ULK1	13	13	13	5	13	5.1386e+88
0	UBE2S	13	13	8	5	14	8.502e+88	10458
0	TXN2	13	12	8	4	13	1.666e+87
0	TULP3	13	13	12	2	15	7.42e+87	601730021915
0	TRPV4	13	13	9	4	14	7.231e+87	6884
0	THY1	13	13	13	4	13	4.6549e+88
0	TCAP	13	12	7	3	14	3.0049e+88	30916
0	SYNJ1	13	13	11	6	13	4.6856e+88
0	STXBP1	13	13	9	6	14	7.0527e+88	6904
0	SOX8	13	13	13	2	17	7.422e+87	7.283e+24
0	SLC9A1	13	13	12	5	13	6.885e+87
0	SLC1A4	13	10	6	4	13	6.835e+87
0	SIX1	13	13	11	4	18	4.5664e+88	7.389e+31
0	SERPINA1	13	13	12	4	13	3.2355e+88
0	SEH1L	13	13	12	6	16	5.5085e+88	8.70007e+15
0	SCRIB	13	13	13	6	14	1.921e+87	8283
0	SATB1	13	12	8	6	13	4.4419e+88
0	SALL1	13	13	12	3	23	7.507e+87	2.1983e+67
0	RPS6	13	13	10	4	15	1.9058e+88	425930031018
0	RPS3	13	13	13	5	15	6.917e+87	310180006413
0	RPL11	13	13	10	6	14	9.79e+87	31018
0	ROCK1	13	12	11	7	15	7.411e+87	9100022614
0	RNF4	13	13	6	2	13	8.502e+88
0	RFC3	13	13	4	4	14	7.50006e+85	84
0	RELN	13	13	11	6	14	7.41101e+87	21511
0	RACGAP1	13	13	13	9	16	9.79001e+87	9.10001e+16
0	PVRL1	13	13	6	6	14	7.411e+87	60041
0	PTPRU	13	13	11	5	13	8.285e+87
0	PTPRF	13	13	8	4	14	8.28501e+87	50803
0	PRKAR1A	13	13	11	5	14	6.112e+87	1707
0	PPIA	13	13	10	8	13	4.4419e+88
0	PPAP2B	13	13	11	5	14	4.433e+88	1568
0	POU3F3	13	13	12	4	18	4.5941e+88	7.2236e+32
0	POLR2J	13	12	5	3	13	6.368e+87
0	POLR2I	13	12	5	3	13	6.368e+87
0	POLR2C	13	12	5	3	13	6.368e+87
0	POLR2B	13	12	5	3	13	6.368e+87
0	POLE	13	13	8	3	15	6.139e+87	840000216
0	POLD1	13	13	7	2	15	6.139e+87	94110000084
0	PHGDH	13	12	7	4	16	1.953e+88	2.151e+18
0	PHF8	13	10	7	5	13	4.5943e+88
0	PDGFRB	13	13	12	3	15	5.073e+88	18940001822
0	NPY1R	13	13	11	4	13	7.626e+87
0	NME2	13	11	6	3	13	5.5086e+88
0	NLRP3	13	13	8	4	14	6.91701e+87	32621
0	NLRP12	13	12	9	3	13	4.3124e+88
0	NFKBIB	13	13	7	2	13	2.755e+87
0	NCK2	13	13	10	3	13	8.285e+87
0	NCF1B	13	11	7	5	14	7.0947e+88	8283
0	MYF5	13	13	12	4	14	1.502e+87	1503
0	MSX2	13	13	11	3	13	8.285e+87
0	MSTN	13	13	11	5	17	4.5941e+88	9.629e+24
0	MRE11A	13	13	4	2	14	6.31e+87	32508
0	MNX1	13	13	11	3	15	6.959e+87	310180021904
0	MC1R	13	13	11	4	15	7.41101e+87	434730009650
0	MAP2K4	13	12	5	1	13	2.755e+87
0	MAD2L1	13	11	7	5	15	7.00051e+85	870000236
0	LTA	13	13	11	4	13	6.917e+87
0	LRP1	13	11	9	4	14	4.2953e+88	8283
0	LHCGR	13	13	9	2	15	4.2493e+88	305390008584
0	LDB1	13	13	12	3	14	9.72002e+86	9948
0	KNG1	13	12	8	3	13	7.162e+87
0	KALRN	13	12	12	3	13	5.1056e+88
0	JARID2	13	12	10	3	13	8.285e+87
0	ITPR2	13	13	12	5	13	5.5085e+88
0	ITGB2	13	12	10	5	14	5.073e+88	8360

## Sheet: hub_genes_nervous
List of DEGs in nervous tissue transcriptomic data characterized as hub-genes from "Gorevenge" (in a descending order of linked GO terms)
in_gene	gene	GO count	prune[0.6]	Up or down regulated	Functions/Biological Processes
1	FGF2	48	39	up	apoptosis, negative regulation of cell proliferation,extracellular space,nervous system development,growth factor activity, signal transduction, protein binding
1	GJA1	30	29	up	signal transducer activity, apoptosis, negative regulation of cell proliferation, protein binding
1	ATP2B2	31	25	down	ATP binding, calmodulin binding, calcium ion binding
1	ERBB3	25	23	up	ATP binding, transferase activity
1	MEF2C	29	22	down	apoptosis, nervous system development
1	GRIN2A	29	20	down	protein binding, calcium ion binding, ion transport
1	PRKCZ	25	20	down	ATP binding, transferase activity, anti-apoptosis
1	CRYAB	21	19	up	unfolded protein binding, anti-apoptosis, protein folding
1	STAT1	30	18	down	protein binding, calcium ion binding, signal transducer activity, signal transduction
1	HTR2A	21	18	down	signal transduction, synaptic transmission
1	MAP1B	24	17	down	structural molecule activity, actin binding, protein binding
1	F3	22	17	up	anti-apoptosis
1	GNAQ	21	17	down	protein binding, signal transducer activity, GTPase activity, G-protein coupled receptor protein signaling pathway, signal transduction, GTP binding
1	FGF1	19	16	up	protein binding, signal transduction, growth factor activity
1	CALM3	19	16	down	calcium ion binding, G-protein coupled receptor protein signaling pathway
1	FKBP1A	18	15	down	signal transducer activity
1	WWTR1	16	12	up	protein binding
1	TXNIP	16	12	up	protein binding
1	MAPK9	18	11	down	ATP binding, protein serine/threonine kinase activity, transferase activity
1	CRH	17	11	down	signal transduction, synaptic transmission
1	SST	15	11	down	G-protein coupled receptor protein signaling pathway, negative regulation of cell proliferation, synaptic transmission
1	PRKCB	14	11	down	protein binding, ATP binding, calcium ion binding, transferase activity
1	ZEB2	13	11	up	nervous system development
1	RAN	16	10	down	signal transduction,protein binding, GTPase activity, GTP binding, chromatin binding, intracellular protein transport
