# Supplementary material for: Comparative Meta-Analysis of Transcriptomics Data during Cellular Senescence and In Vivo Tissue Ageing
Source: Oxid Med Cell Longev. 2015 Apr 21;2015:732914. doi: 10.1155/2015/732914 (PMC4419258; doi:10.1155/2015/732914)
Supplement: Supplementary file 1 — Supplementary material includes five (5) excel files termed as Supplementary Tables S1-S5. The S1 file includes one (1) spreadsheet; a summary Table of analyzed transcriptomics data and experimental conditions. The S2 file includes nine (9) spreadsheets: (1) a list of 390 fully annotated DEGs extracted from Statistical analysis (p-value≤0.05, FDR≤0.05, F.C filtering >0.26 and <-0.26, in log2 scale) of nervous tissue; (2) a list of DEGs in nervous tissue with gene expression-fold change >=1.5 fold; (3) a summary Table with the results of functional analysis of DEGs in nervous tissue by "Stranger" based on GO terms; the (4), (5), (6) Tables with the results of functional analysis of DEGs in nervous tissue with "Stranger" based on Cellular Location, Function and Biological Process of GO tree, respectively; (7) a list of DEGs enriched in Functions and Biological Processes found to be overrepresented in nervous tissue transcriptomics data; (8) a Table with the genes and GO terms associated with DEGs enriched in Biological Processes found to be over-represented in nervous tissue transcriptomics data - "Gorevenge output"; (9) a list of DEGs in nervous tissue transcriptomic data characterized as hub-genes from "Gorevenge" (in a descending order of linked GO terms). The S3 file includes seven (7) spreadsheets: the (1), (2) Tables with the enrichment score of Functions and Biological Processes over-represented in males muscle tissue, respectively (the number of enriched up- or down-regulated genes is also shown); the (3), (4) Tables with the enrichment score of Functions and Biological Processes over-represented in females muscle tissue, respectively (the number of enriched up- or down-regulated genes is also shown); (5) a list of genes enriched in over-represented Biological Processes of females muscle tissue with the common genes and Biological Processes to be highlighted; (6) a Table with the enriched up- or down- regulated genes in over-represented Biological Processes of [file 732914.f1.zip › 732914.f1/732914 Voutetakis_et_al_Suppl_Table_S3.xls]

## Sheet: F_GDS288_287_156
Table S3: Enrichment score of Functions over-represented in males muscle tissue
Function	GO Category	Enrichment288	%Enrichment288	Enrichment287	%Enrichment287	Enrichment156	%Enrichment156	%Enrichment		Enrichment288	Enrichment287	Enrichment156
protein heterodimerization activity	F			15/79	18.9873			18.9873		RNA binding	RNA binding	protein binding
acyltransferase activity	F			12/78	15.3846			15.3846		protein binding	nucleotide binding	electron carrier activity
transcription coactivator activity	F			21/146	14.3836			14.3836		metal ion binding	protein binding	iron ion binding
chromatin binding	F			13/93	13.9785			13.9785		DNA binding	DNA binding	RNA binding
GTPase activity	F			22/164	13.4146			13.4146		zinc ion binding	nucleic acid binding	unfolded protein binding
isomerase activity	F			11/82	13.4146			13.4146		magnesium ion binding	ATP binding	oxidoreductase activity
transcription corepressor activity	F			14/105	13.3333			13.3333			zinc ion binding	transcription factor binding
GTP binding	F			33/270	12.2222			12.2222			transferase activity	GTPase activator activity
ubiquitin-protein ligase activity	F			13/115	11.3043			11.3043			GTP binding	peptidase activity
manganese ion binding	F			11/103	10.6796			10.6796			protein heterodimerization activity	ATPase activity
actin binding	F			21/197	10.6599			10.6599			metal ion binding	sequence-specific DNA binding transcription factor activity
protein serine/threonine kinase activity	F			31/297	10.4377			10.4377			transcription coactivator activity	identical protein binding
protein homodimerization activity	F			12/120	10			10			molecular_function	transcription activator activity
methyltransferase activity	F			7/70	10			10			hydrolase activity	nucleic acid binding
binding	F			23/232	9.91379			9.91379			GTPase activity	nucleotide binding
unfolded protein binding	F			13/89	14.6067	4/77	5.19481	9.90077			protein serine/threonine kinase activity	molecular_function
structural constituent of cytoskeleton	F			8/82	9.7561			9.7561			acyltransferase activity
electron carrier activity	F			10/99	10.101	12/140	8.57143	9.33622			unfolded protein binding
ATP binding	F			98/1063	9.21919			9.21919			chromatin binding
RNA polymerase II transcription factor activity	F			12/131	9.16031			9.16031			transcription corepressor activity
receptor binding	F			9/100	9			9			actin binding
transcription repressor activity	F			7/78	8.97436			8.97436			binding
hydrolase activity	F			61/683	8.93119			8.93119			isomerase activity
transferase activity	F			81/925	8.75676			8.75676			ubiquitin-protein ligase activity
signal transducer activity	F			21/245	8.57143			8.57143			sequence-specific DNA binding transcription factor activity
structural molecule activity	F			18/211	8.53081			8.53081			transcription activator activity
nucleic acid binding	F			55/451	12.1951		3.84615	8.02064			manganese ion binding
ligase activity	F			14/177	7.9096			7.9096			signal transducer activity
transcription factor binding	F			8/73	10.9589	4/84	4.7619	7.8604			protein homodimerization activity
RNA binding	F	9/293	3.07167	64/417	15.3477	12/339	3.53982	7.31974			transcription factor binding
transcription activator activity	F			11/103	10.6796	4/104	3.84615	7.26288			structural molecule activity
ATPase activity	F			9/91	9.89011	4/92	4.34783	7.11897			electron carrier activity
nucleotide binding	F			155/1348	11.4985	29/1220	2.37705	6.93778			RNA polymerase II transcription factor activity
molecular_function	F			49/501	9.78044	8/262	3.05344	6.41694			ATPase activity
DNA binding	F	11/595	1.84874	82/782	10.4859	4/104		6.16734			structural constituent of cytoskeleton
identical protein binding	F			12/139	8.63309	6/176	3.40909	6.02109			identical protein binding
iron ion binding	F					6/104	5.76923	5.76923			methyltransferase activity
sequence-specific DNA binding transcription factor activity	F			52/724	7.18232	16/581	2.75387	4.9681			receptor binding
protein binding	F	29/2037	1.42366	334/3248	10.2833	90/3260	2.76074	4.82255			ligase activity
zinc ion binding	F	18/1229	1.46461	114/1430	7.97203			4.71832			transcription repressor activity
metal ion binding	F	18/1171	1.53715	116/1491	7.78001			4.65858
GTPase activator activity	F					4/88	4.54545	4.54545
oxidoreductase activity	F					9/248	3.62903	3.62903
peptidase activity	F					9/271	3.32103	3.32103
magnesium ion binding	F	4/186	2.15054					2.15054

## Sheet: BP_GDS288_287_156
Enrichment score of Biological Processes over-represented in males muscle tissue (the number of enriched up- or down-regulated genes is also shown)
Biological_Process	GO Category	Enrichment288	%Enrichment288	Enrichment287	%Enrichment287	Enrichment156	%Enrichment156	%Enrichment	#up_regulated288	#down_regulated288	#up_regulated287	#down_regulated287	#up_regulated156	#down_regulated156	Biological_P_GDS288	Biological_P_GDS287	Biological_P_GDS156
mRNA processing	P			28/154	18.1818			18.1818			28	0				mRNA processing	protein amino acid dephosphorylation
cell cycle arrest	P			12/70	17.1429			17.1429			11	1			transport	cell cycle arrest	cellular component movement
intracellular protein transport	P			24/143	16.7832			16.7832			24	0				intracellular protein transport	oxidation reduction
regulation of transcription from RNA polymerase II promoter	P			24/163	14.7239			14.7239			23	1				regulation of transcription from RNA polymerase II promoter
protein modification process	P			11/75	14.6667			14.6667			10	1				protein modification process
negative regulation of cell cycle	P			12/89	13.4831			13.4831			12	0				negative regulation of cell cycle	response to DNA damage stimulus
regulation of cell growth	P			10/75	13.3333			13.3333			9	1				regulation of cell growth
small GTPase mediated signal transduction	P			21/160	13.125			13.125			20	1				small GTPase mediated signal transduction
protein folding	P			23/186	12.3656			12.3656			21	2				protein folding
chromatin modification	P			11/90	12.2222			12.2222			10	1				chromatin modification	negative regulation of cell proliferation
negative regulation of transcription	P			9/75	12			12			9	0				negative regulation of transcription	transport
cell proliferation	P			32/272	11.7647			11.7647			27	5				cell proliferation	DNA replication
RNA splicing	P			31/171	18.1287	8/151	5.29801	11.7133			31	0	8	0		RNA splicing
angiogenesis	P			8/71	11.2676			11.2676			4	4			cell differentiation	angiogenesis	anti-apoptosis
transmembrane receptor protein tyrosine kinase signaling pathway	P			8/71	11.2676			11.2676			8	0				transmembrane receptor protein tyrosine kinase signaling pathway
ubiquitin-dependent protein catabolic process	P			16/105	15.2381	6/88	6.81818	11.0281			16	0	4	2		ubiquitin-dependent protein catabolic process
protein complex assembly	P			12/110	10.9091			10.9091			12	0				protein complex assembly
negative regulation of transcription from RNA polymerase II promoter	P			13/120	10.8333			10.8333			13	0				negative regulation of transcription from RNA polymerase II promoter	ubiquitin-dependent protein catabolic process
cell surface receptor linked signaling pathway	P			14/137	10.219			10.219			11	3				cell surface receptor linked signaling pathway	induction of apoptosis
negative regulation of cell proliferation	P			27/164	16.4634	7/187	3.74332	10.1034			27	0	6	1		negative regulation of cell proliferation	RNA splicing
muscle contraction	P			7/74	9.45946			9.45946			7	0				muscle contraction	regulation of transcription
transcription from RNA polymerase II promoter	P			17/183	9.28962			9.28962			16	1				transcription from RNA polymerase II promoter
positive regulation of cell proliferation	P			13/143	9.09091			9.09091			12	1				positive regulation of cell proliferation
cell cycle	P			50/363	13.7741	11/272	4.04412	8.90911			47	3	6	5	transcription	cell cycle	cell division
DNA repair	P			15/123	12.1951	5/90	5.55556	8.87534			15	0	5	0		DNA repair	nervous system development
anti-apoptosis	P			16/129	12.4031	6/124	4.83871	8.62091			15	1	4	2	ion transport	anti-apoptosis	apoptosis
cellular component movement	P			15/123	12.1951	4/86	4.65116	8.42314			15	0	3	1		cellular component movement	mitosis
protein amino acid phosphorylation	P			35/424	8.25472			8.25472			34	1				protein amino acid phosphorylation
induction of apoptosis	P			11/108	10.1852	6/105	5.71429	7.94974			10	1	3	3		induction of apoptosis	organ morphogenesis
protein transport	P	4/185	2.16216	33/249	13.253			7.70759	4	0	32	1				protein transport
cell division	P			17/144	11.8056	5/139	3.59712	7.70134			15	2	3	2	ubiquitin cycle	cell division	DNA repair
mitosis	P			9/108	8.33333	6/100	6	7.16667			9	0	5	1		mitosis	positive regulation of transcription from RNA polymerase II promoter
DNA replication	P			10/104	9.61538	4/85	4.70588	7.16063			10	0	2	2		DNA replication	nuclear mRNA splicing, via spliceosome
biological_process	P			54/519	10.4046	10/264	3.78788	7.09625			48	6	7	3	regulation of transcription, DNA-dependent	biological_process	cell cycle
signal transduction	P			83/1183	7.01606			7.01606			74	9				signal transduction
ubiquitin cycle	P	4/242	1.65289	30/265	11.3208			6.48682	4	0	29	1				ubiquitin cycle
apoptosis	P			25/281	8.8968	7/217	3.22581	6.0613			23	2	3	4	protein transport	apoptosis	biological_process
protein amino acid dephosphorylation	P					5/87	5.74713	5.74713					1	4
transcription	P	13/764	1.70157	98/1023	9.57967			5.64062	13	0	91	7				transcription
nuclear mRNA splicing, via spliceosome	P					5/95	5.26316	5.26316					5	0
regulation of transcription, DNA-dependent	P	14/953	1.46905	106/1244	8.5209			4.99497	14	0	99	7				regulation of transcription, DNA-dependent
transport	P	7/295	2.37288			21/277	7.58123	4.97705	4	3			3	18
organ morphogenesis	P					4/93	4.30108	4.30108					2	2
response to DNA damage stimulus	P					6/144	4.16667	4.16667					6	0
oxidation reduction	P					11/313	3.51438	3.51438					3	8
positive regulation of transcription from RNA polymerase II promoter	P					6/172	3.48837	3.48837					4	2
nervous system development	P					7/205	3.41463	3.41463					5	2
regulation of transcription	P					16/488	3.27869	3.27869					13	3
ion transport	P	4/194	2.06186					2.06186	4	0
cell differentiation	P	3/154	1.94805					1.94805	3	0

## Sheet: F_GDS472_plus_473
Enrichment score of Functions over-represented in females muscle tissue
Function	GO Category	Enrichment 472	Enrichment 473	%Enrichment		Enrichment 472	Enrichment 473
structural constituent of ribosome	F	17/144		11.8056		oxidoreductase activity	transferase activity
transporter activity	F	24/235		10.2128		protein binding	GTP binding
GTPase activity	F	15/164		9.14634		RNA binding	oxidoreductase activity
catalytic activity	F	11/122		9.01639		transporter activity	molecular_function
oxidoreductase activity	F	35/337	11/187	8.77863		structural constituent of ribosome	nucleotide binding
iron ion binding	F	18/218		8.25688		nucleotide binding	metal ion binding
RNA binding	F	34/417		8.15348		iron ion binding	zinc ion binding
ligase activity	F	14/177		7.9096		GTPase activity	protein binding
protein tyrosine kinase activity	F	8/102		7.84314		hydrolase activity	DNA binding
GTP binding	F	18/270	13/187	6.78337		transferase activity	nucleic acid binding
identical protein binding	F	9/139		6.47482		ligase activity	signal transducer activity
GTPase activator activity	F	7/112		6.25		catalytic activity	kinase activity
ubiquitin-protein ligase activity	F	7/115		6.08696		GTP binding	ATP binding
signal transducer activity	F		7/131	5.34351		ATP binding	actin binding
kinase activity	F	9/168	6/115	5.30035		protein tyrosine kinase activity	hydrolase activity
actin binding	F	11/197	6/130	5.19878		binding	binding
binding	F	14/232	7/199	4.87239		DNA binding
transferase activity	F	46/925	27/582	4.84406		metal ion binding
hydrolase activity	F	38/683	13/396	4.7266		identical protein binding
nucleotide binding	F	67/1348	30/852	4.40909		actin binding
molecular_function	F	20/501	14/287	4.31472		GTPase activator activity
ATP binding	F	49/1063	21/638	4.11523		ubiquitin-protein ligase activity
protein binding	F	159/3248	57/2037	4.08704		kinase activity
DNA binding	F	35/782	21/595	4.06681		molecular_function
nucleic acid binding	F		16/420	3.80952
metal ion binding	F	58/1491	38/1171	3.60631
zinc ion binding	F		39/1229	3.17331

## Sheet: BP_GDS472_plus_GD473
Enrichment score of Biological Processes over-represented in females muscle tissue (the number of enriched up- or down-regulated genes is also shown)
Biological_Process	GO Category	Enrichment 472	Enrichment 473	%Enrichment	#up_regulated 472	#down_regulated 472	#up_regulated 473	#down_regulated 473	Enrichment 472	Enrichment 473
translation	P	19/188	13/130	10.0629	3	16	1	12	transport	translation
protein amino acid dephosphorylation	P	11/113		9.73451	0	11			metabolic process	electron transport
ubiquitin-dependent protein catabolic process	P	10/105		9.52381	2	8			electron transport	protein transport
electron transport	P	23/251	11/131	8.90052	3	20	0	11	translation	transcription
protein folding	P	16/186		8.60215	2	14			ubiquitin cycle	regulation of transcription, DNA-dependent
metabolic process	P	35/414		8.45411	6	29			protein folding	protein amino acid phosphorylation
small GTPase mediated signal transduction	P	13/160		8.125	3	10			protein amino acid dephosphorylation	signal transduction
ubiquitin cycle	P	21/265		7.92453	4	17			nervous system development	transport
mRNA processing	P	12/154		7.79221	6	6			small GTPase mediated signal transduction	biological_process
anti-apoptosis	P	10/129		7.75194	2	8			ubiquitin-dependent protein catabolic process	apoptosis
induction of apoptosis	P	8/108		7.40741	3	5			mRNA processing
carbohydrate metabolic process	P	13/176		7.38636	2	11			carbohydrate metabolic process
nervous system development	P	18/260		6.92308	5	13			anti-apoptosis
transport	P	37/430	12/295	6.75862	6	31	0	12	cell differentiation
positive regulation of cell proliferation	P	9/143		6.29371	3	6			apoptosis
negative regulation of cell proliferation	P	10/164		6.09756	3	7			induction of apoptosis
cell differentiation	P	16/269		5.94796	4	12			protein amino acid phosphorylation
RNA splicing	P	10/171		5.84795	5	5			negative regulation of cell proliferation
DNA replication	P	6/104		5.76923	3	3			positive regulation of cell proliferation
protein transport	P	12/249	13/185	5.76037	1	11	2	11	RNA splicing
organ morphogenesis	P	7/122		5.7377	2	5			multicellular organismal development
apoptosis	P	16/281	6/148	5.12821	2	14	0	6	cell cycle
lipid metabolic process	P	10/200		5	0	10			transcription
protein amino acid phosphorylation	P	21/424	12/274	4.72779	6	15	3	9	proteolysis
cell cycle	P	17/363		4.6832	7	10			organ morphogenesis
proteolysis	P	16/347		4.61095	4	12			protein transport
cell proliferation	P	12/272		4.41176	5	7			lipid metabolic process
multicellular organismal development	P	28/644		4.34783	7	21			DNA replication
biological_process	P		11/293	3.75427			1	10	cell proliferation
transcription	P	40/1023	27/764	3.7493	14	26	7	20
signal transduction	P		20/579	3.45423			4	16
regulation of transcription, DNA-dependent	P		31/953	3.25289			7	24

## Sheet: BP_genes_female
Genes enriched in over-represented Biological Processes of females muscle tissue. Common genes and Biological Processes are highlighted.										TFCP2				UQCRH
GDS472_P	GDS473_P	GDS472_P_apoptosis	GDS473_P_apoptosis	GDS472_P_electron_transport	GDS473_P_electron_transport	GDS472_P_protein amino acid phosphorylation	GDS473_P_protein amino acid phosphorylation	GDS472_P_protein transport	GDS473_P_protein transport	GDS472_P_transcription	GDS473_P_transcription	GDS472_P_translation	GDS473_P_translation	GDS472_P_transport	GDS473_P_transport
anti-apoptosis	apoptosis	AIFM1	PAK1	AIFM1	SDHC	PTPLA	BRD4	EXOC3	VPS29	HIVEP1	ZFP64	MRPL18	MRPL4	ABCC6	SDHC
apoptosis	biological_process	CYCS	SH3KBP1	CYCS	DLD	DUSP3	PAK1	TRAM1	RAB24	PTMA	CDCA7L	MRPL3	MRPS10	ASNA1	SLC25A40
carbohydrate metabolic process	electron transport	MAP3K5	HIPK2	SDHB	NOS1	PTPN11	FLT1	RAB4A	DNAJC14	RXRG	PHF5A	MRPL13	MRRF	CYCS	SLC25A3
cell cycle	protein amino acid phosphorylation	PDCD5	BAG2	ACADM	CYP2S1	EPM2A	INSR	HSP90B1	TIMM50	SMAD2	ZNF610	MRPL12	MTFMT	SDHB	TM9SF3
cell differentiation	protein transport	GLRX2	SEMA6A	MTRR	NDUFA12	PTPRO	ERG	SNX3	ZFYVE20	PAPOLA	SOX7	EEF1E1	MRPL32	SLC25A46	DIRC2
cell proliferation	regulation of transcription, DNA-dependent	BAG2	PDCD2	CYB5B	NNT	PPP6C	SCYL2	GDI2	SNX5	RNF14	CCNL2	MRPL48	MRPS15	PEA15	ANKH
DNA replication	signal transduction	OPA1		HCCS	FOXRED1	ACP1	ALPK3	RAB5A	SFT2D1	SFPQ	MORF4L2	MRPL34	MRPL35	SLC25A4	STAU2
electron transport	transcription	HTRA2		GLRX2	COX4I1	PTPN3	HIPK2	PEX7	DERL1	HDAC4	ZFP28	RPL3	PELO	CYB5B	TRAPPC1
induction of apoptosis	translation	ATG5		UQCRC1	RFESD	PTP4A1	DGUOK	RAB1A	RAB18	HIVEP2	ERG	MRPS12	MRPL47	GLRX2	SLC7A3
lipid metabolic process	transport	RNF130		MICAL2	AGPS	DUSP13	MAP4K4	KDELR2	C18orf55	ZNF274	PPARA	MRPL15	MRPL36	SLC35E1	SLC14A1
metabolic process		CIDEC		CYBB	MTO1	RNGTT	BRAF	MTX2	GDI2	SUPT4H1	ZNF254	PDE4DIP	MRPL30	SLC25A11	MTCH2
mRNA processing		FASTKD1		AGPS			PAK2	RAB7A	DNAJC19	NFIB	CGGBP1	MRPS18A	MRPS36	AP4S1	SLC25A30
multicellular organismal development		MRPS30		CYB5R3					EXOC6	POLR2K	HDAC4	MRPS33	PAK2	UQCRC1
negative regulation of cell proliferation		SIVA1		SDHC						ZNF43	HIPK2	RPS27L		SLC20A2
nervous system development		GULP1		UQCRFS1						TFDP1	MAML2	MRPS15		SLC16A3
organ morphogenesis		SEMA6A		DLD						TCEB1	ZNF253	QRSL1		SLC22A14
positive regulation of cell proliferation				CYC1						MLF1	KLF13	RPL31		KHSRP
protein amino acid dephosphorylation				FDX1						CBX7	ZBTB47	MRPS30		SLC26A2
protein amino acid phosphorylation				NNT						ESRRA	CAMTA1	MRPS18B		SLC29A1
protein folding				COX7B						CEBPG	ZBTB9			TM9SF2
protein transport				GRHPR						ZBTB10	MAFK			AQP1
proteolysis				COX7C						KHSRP	NRBF2			SDHC
RNA splicing				UQCRC2						BRD8	NFIC			FABP3
small GTPase mediated signal transduction										ZNF160	ARID1B			UQCRFS1
transcription										HSF1	ZNF585A			UQCRB
translation										DR1	SMYD1			RBM8A
transport										PA2G4	ZNF358			CYC1
ubiquitin cycle										GRLF1				FDX1
ubiquitin-dependent protein catabolic process										ZNF587				AKAP8
										CBX3				SLC25A12
										CGGBP1				SLCO1A2
										TCF7L2				MTCH2
										BZW1				SLC16A1
										ZNF253				ATP8B1
										SUPT6H				UQCRC2
										KHDRBS1				UCP2
										CEBPB
										PNN
										FLII

## Sheet: graph_male
Enriched up- or down- regulated genes in over-represented Biological Processes of males muscle tissue (a comparative histogram of these numbers in three datasets is depicted).
Biological_Process	#up_regulated288	#down_regulated288	#up_regulated	#down_regulated	#up_regulated156	#down_regulated156
mRNA processing			28	0
cell cycle arrest			11	1
intracellular protein transport			24	0
regulation of transcription from RNA polymerase II promoter			23	1
protein modification process			10	1
negative regulation of cell cycle			12	0
regulation of cell growth			9	1
small GTPase mediated signal transduction			20	1
protein folding			21	2
chromatin modification			10	1
negative regulation of transcription			9	0
cell proliferation			27	5
RNA splicing			31	0	8	0
angiogenesis			4	4
transmembrane receptor protein tyrosine kinase signaling pathway			8	0
ubiquitin-dependent protein catabolic process			16	0	4	2
protein complex assembly			12	0
negative regulation of transcription from RNA polymerase II promoter			13	0
cell surface receptor linked signaling pathway			11	3
negative regulation of cell proliferation			27	0	6	1
muscle contraction			7	0
transcription from RNA polymerase II promoter			16	1
positive regulation of cell proliferation			12	1
cell cycle			47	3	6	5
DNA repair			15	0	5	0
anti-apoptosis			15	1	4	2
cellular component movement			15	0	3	1
protein amino acid phosphorylation			34	1
induction of apoptosis			10	1	3	3
protein transport	4	0	32	1
cell division			15	2	3	2
mitosis			9	0	5	1
DNA replication			10	0	2	2
biological_process			48	6	7	3
signal transduction			74	9
ubiquitin cycle	4	0	29	1
apoptosis			23	2	3	4
protein amino acid dephosphorylation					1	4
transcription	13	0	91	7
nuclear mRNA splicing, via spliceosome					5	0
regulation of transcription, DNA-dependent	14	0	99	7
transport	4	3			3	18
organ morphogenesis					2	2
response to DNA damage stimulus					6	0
oxidation reduction					3	8
positive regulation of transcription from RNA polymerase II promoter					4	2
nervous system development					5	2
regulation of transcription					13	3
ion transport	4	0
cell differentiation	3	0

## Sheet: graph_female
Enriched up- or down- regulated genes in over-represented Biological Processes of females muscle tissue (a comparative histogram of these numbers in three datasets is depicted).
Biological_Process	#up_regulated	#down_regulated	#up_regulated	#down_regulated
translation	3	16	1	12
protein amino acid dephosphorylation	0	11
ubiquitin-dependent protein catabolic process	2	8
electron transport	3	20	0	11
protein folding	2	14
metabolic process	6	29
small GTPase mediated signal transduction	3	10
ubiquitin cycle	4	17
mRNA processing	6	6
anti-apoptosis	2	8
induction of apoptosis	3	5
carbohydrate metabolic process	2	11
nervous system development	5	13
transport	6	31	0	12
positive regulation of cell proliferation	3	6
negative regulation of cell proliferation	3	7
cell differentiation	4	12
RNA splicing	5	5
DNA replication	3	3
protein transport	1	11	2	11
organ morphogenesis	2	5
apoptosis	2	14	0	6
lipid metabolic process	0	10
protein amino acid phosphorylation	6	15	3	9
cell cycle	7	10
proteolysis	4	12
cell proliferation	5	7
multicellular organismal development	7	21
transcription	14	26	7	20
signal transduction			4	16
regulation of transcription, DNA-dependent			7	24
biological_process			1	10
