# Supplementary material for: Comparative Meta-Analysis of Transcriptomics Data during Cellular Senescence and In Vivo Tissue Ageing
Source: Oxid Med Cell Longev. 2015 Apr 21;2015:732914. doi: 10.1155/2015/732914 (PMC4419258; doi:10.1155/2015/732914)
Supplement: Supplementary file 1 — Supplementary material includes five (5) excel files termed as Supplementary Tables S1-S5. The S1 file includes one (1) spreadsheet; a summary Table of analyzed transcriptomics data and experimental conditions. The S2 file includes nine (9) spreadsheets: (1) a list of 390 fully annotated DEGs extracted from Statistical analysis (p-value≤0.05, FDR≤0.05, F.C filtering >0.26 and <-0.26, in log2 scale) of nervous tissue; (2) a list of DEGs in nervous tissue with gene expression-fold change >=1.5 fold; (3) a summary Table with the results of functional analysis of DEGs in nervous tissue by "Stranger" based on GO terms; the (4), (5), (6) Tables with the results of functional analysis of DEGs in nervous tissue with "Stranger" based on Cellular Location, Function and Biological Process of GO tree, respectively; (7) a list of DEGs enriched in Functions and Biological Processes found to be overrepresented in nervous tissue transcriptomics data; (8) a Table with the genes and GO terms associated with DEGs enriched in Biological Processes found to be over-represented in nervous tissue transcriptomics data - "Gorevenge output"; (9) a list of DEGs in nervous tissue transcriptomic data characterized as hub-genes from "Gorevenge" (in a descending order of linked GO terms). The S3 file includes seven (7) spreadsheets: the (1), (2) Tables with the enrichment score of Functions and Biological Processes over-represented in males muscle tissue, respectively (the number of enriched up- or down-regulated genes is also shown); the (3), (4) Tables with the enrichment score of Functions and Biological Processes over-represented in females muscle tissue, respectively (the number of enriched up- or down-regulated genes is also shown); (5) a list of genes enriched in over-represented Biological Processes of females muscle tissue with the common genes and Biological Processes to be highlighted; (6) a Table with the enriched up- or down- regulated genes in over-represented Biological Processes of [file 732914.f1.zip › 732914.f1/732914 Voutetakis_et_al_Suppl_Table_S4.xls]

## Sheet: DEGs_muscle_nervous
Table S4: Cumulative list of DEGs during in vivo tissue ageing. DEGs specific in males (M) and females (F) are highlited with blue and red color, respectively; DEGs common in both sexes (F, M) are shown with black lettering.
muscle_nervous_geneID	p-value	FDR	Fold Change (log2) old vs young	Fold Change (natural) old vs young	Gene title	Muscle or Nervous	Duplicate	Male or Female
A2BP1	0.00427642	0.0293225	0.296905	1.22851	ataxin 2-binding protein 1	muscle		F
ABCA1	0.000581837	0.0253692	0.908752	1.87742	ATP-binding cassette, sub-family A (ABC1), member 1	muscle		M
ABCA2	0.00335683	0.0347307	0.46102	1.37651	ATP-binding cassette, sub-family A (ABC1), member 2	nervous		F+M
ABCA6	0.00104174	0.094306	0.496606	1.41089	ATP-binding cassette, sub-family A (ABC1), member 6	muscle		F+M
ABCA8	0.00328181	0.0412235	0.87436	1.8332	ATP-binding cassette, sub-family A (ABC1), member 8	muscle		M
ABCC6	0.000125902	0.00977831	-0.271035	0.828725	ATP-binding cassette, sub-family C (CFTR/MRP), member 6	muscle		F
ABHD14A	0.00398291	0.0286731	-0.269255	0.829748	abhydrolase domain containing 14A	muscle		F
ABHD3	0.00180148	0.0338961	1.22555	2.33845	abhydrolase domain containing 3	muscle	duplicate	M
ABHD3	9.04445e-05	0.0603303	1.32013	2.49689	abhydrolase domain containing 3	muscle	duplicate	F+M
ABI2	0.00154171	0.0319096	-0.305321	0.809262	abl-interactor 2	muscle	duplicate	F
ABI2	4.9873e-05	0.0050066	-1.1962	0.436423	abl-interactor 2	nervous	duplicate	F+M
ABLIM2	0.000217297	0.0167307	0.482148	1.39682	actin binding LIM protein family, member 2	muscle	duplicate	F
ABLIM2	0.000214595	0.0266678	0.830428	1.77821	actin binding LIM protein family, member 2	muscle	duplicate	M
ABR	0.0104846	0.0442002	0.281699	1.21563	active BCR-related gene	muscle		F
ABTB2	0.000372928	0.0123453	-0.286616	0.819823	ankyrin repeat and BTB (POZ) domain containing 2	muscle		F
ACAD8	0.000112973	0.0146367	0.331724	1.25852	acyl-CoA dehydrogenase family, member 8	muscle		M
ACADM	0.000245915	0.0115484	-0.290999	0.817336	acyl-CoA dehydrogenase, C-4 to C-12 straight chain	muscle		F
ACHE	0.00554739	0.0286038	-0.580314	0.668818	acetylcholinesterase	muscle		F
ACN9	0.000265478	0.0117821	-0.557212	0.679614	ACN9 homolog (S. cerevisiae)	muscle		F
ACO2	0.000835278	0.0154743	-0.388513	0.763917	aconitase 2, mitochondrial	muscle		F
ACOT13	0.000414238	0.0124848	-0.289397	0.818244	acyl-CoA thioesterase 13	muscle	duplicate	F
ACOT13	0.00641344	0.0425589	0.301863	1.23274	acyl-CoA thioesterase 13	nervous	duplicate	F+M
ACP1	0.00281069	0.0248934	-0.37125	0.773112	acid phosphatase 1, soluble	muscle		F
ACRV1	0.00457051	0.0301121	-0.271777	0.828299	acrosomal vesicle protein 1	muscle		F
ACSL1	0.00749048	0.0380521	-0.43581	0.739279	acyl-CoA synthetase long-chain family member 1	muscle		F
ACSL4	0.000364994	0.012284	-0.276822	0.825407	acyl-CoA synthetase long-chain family member 4	muscle		F
ACTA1	8.7489e-07	0.00108321	-0.657608	0.633928	actin, alpha 1, skeletal muscle	nervous		F+M
ACTC1	0.00242315	0.0233006	0.714988	1.64147	actin, alpha, cardiac muscle 1	muscle		F
ACTL6A	0.00460621	0.0418311	0.649623	1.56876	actin-like 6A	nervous		F+M
ACTN2	0.00407507	0.0447428	0.548282	1.46234	actinin, alpha 2	muscle		M
ACTR10	0.0055168	0.0498336	0.293233	1.22538	actin-related protein 10 homolog (S. cerevisiae)	muscle		M
ACTR3	0.00311589	0.0335461	0.350391	1.27491	ARP3 actin-related protein 3 homolog (yeast)	nervous		F+M
ACTR3B	0.000661193	0.0849308	0.716847	1.64359	ARP3 actin-related protein 3 homolog B (yeast)	muscle		F+M
ADAM23	5.33807e-05	0.0579889	-0.670707	0.628199	ADAM metallopeptidase domain 23	muscle		F+M
ADAP1	0.000330172	0.0779726	-0.302424	0.810889	ArfGAP with dual PH domains 1	muscle		F+M
ADD2	0.00559169	0.0465679	-0.378773	0.769092	adducin 2 (beta)	nervous		F+M
ADD3	0.00330974	0.0339071	0.48911	1.40358	adducin 3 (gamma)	nervous		F+M
ADH1B	0.00396174	0.0445216	1.12082	2.1747	alcohol dehydrogenase 1B (class I), beta polypeptide	muscle	duplicate	M
ADH1B	0.000240696	0.0740725	1.61927	3.07221	alcohol dehydrogenase 1B (class I), beta polypeptide	muscle	duplicate	F+M
ADIPOR1	0.00512016	0.031667	-0.268879	0.829964	adiponectin receptor 1	muscle		F
ADIPOR2	0.00231085	0.0296997	0.452578	1.36848	adiponectin receptor 2	nervous		F+M
ADO	0.00452838	0.0300305	-0.294289	0.815474	2-aminoethanethiol (cysteamine) dioxygenase	muscle		F
ADRA1A	0.000895122	0.0917353	-0.482481	0.715746	adrenergic, alpha-1A-, receptor	muscle		F+M
AGGF1	0.000486161	0.0127496	-0.334359	0.793136	angiogenic factor with G patch and FHA domains 1	muscle		F
AGPS	0.000303961	0.0122759	-0.46559	0.724175	alkylglycerone phosphate synthase	muscle		F
AGXT2L2	0.00453782	0.0485261	0.53421	1.44815	alanine-glyoxylate aminotransferase 2-like 2	muscle		F
AHCYL1	0.00450139	0.0372445	0.438099	1.35482	adenosylhomocysteinase-like 1	nervous		F+M
AHCYL2	0.000718874	0.0157066	0.463873	1.37924	adenosylhomocysteinase-like 2	nervous		F+M
AHNAK	1.5676e-05	0.00633098	0.458581	1.37419	AHNAK nucleoprotein	muscle	duplicate	F
AHNAK	0.000134605	0.00684884	0.672399	1.59372	AHNAK nucleoprotein	nervous	duplicate	F+M
AIFM1	0.00732863	0.0378005	-0.267105	0.830985	apoptosis-inducing factor, mitochondrion-associated, 1	muscle		F
AIMP1	0.00242543	0.0232672	-0.325751	0.797883	aminoacyl tRNA synthetase complex-interacting multifunctional protein 1	muscle		F
AIMP2	0.00289451	0.0247977	-0.325955	0.79777	aminoacyl tRNA synthetase complex-interacting multifunctional protein 2	muscle		F
AK1	0.000713566	0.0842571	-0.796975	0.575555	adenylate kinase 1	muscle		F+M
AK2	0.00402112	0.0288148	-0.309509	0.806916	adenylate kinase 2	muscle		F
AKAP10	0.00119273	0.0204156	-0.354161	0.782324	A kinase (PRKA) anchor protein 10	nervous		F+M
AKAP7	0.00560753	0.0334024	-0.316632	0.802942	A kinase (PRKA) anchor protein 7	muscle		F
AKAP8	3.28795e-05	0.00663945	0.267886	1.20404	A kinase (PRKA) anchor protein 8	muscle		F
AKTIP	0.00280165	0.0418047	-0.469167	0.722382	AKT interacting protein	muscle		F
ALAS1	3.15055e-05	0.00669683	-0.470215	0.721857	aminolevulinate, delta-, synthase 1	muscle		F
ALDH1A1	0.00103841	0.0160681	-0.658199	0.633669	aldehyde dehydrogenase 1 family, member A1	muscle		F
ALDH1B1	0.00405978	0.0286644	-0.465656	0.724142	aldehyde dehydrogenase 1 family, member B1	muscle		F
ALDH4A1	0.00287558	0.0322683	0.429673	1.34693	aldehyde dehydrogenase 4 family, member A1	nervous		F+M
ALDH5A1	0.00132325	0.0216518	0.298598	1.22995	aldehyde dehydrogenase 5 family, member A1	nervous		F+M
ALDH7A1	0.00555988	0.046722	0.425842	1.34336	aldehyde dehydrogenase 7 family, member A1	nervous		F+M
ALDH9A1	6.01229e-06	0.00186096	0.452247	1.36817	aldehyde dehydrogenase 9 family, member A1	nervous		F+M
ALKBH7	0.00324051	0.0445539	-0.414832	0.750107	alkB, alkylation repair homolog 7 (E. coli)	muscle		F
ALPK3	0.00145236	0.0314112	0.466018	1.38129	alpha-kinase 3	muscle	duplicate	F
ALPK3	0.0016582	0.0435364	0.659808	1.57987	alpha-kinase 3	muscle	duplicate	M
ALS2CL	0.00734607	0.0378421	-0.330713	0.795143	ALS2 C-terminal like	muscle		F
AMOT	0.000805976	0.0166314	0.459991	1.37553	angiomotin	nervous		F+M
ANAPC1	3.4558e-06	0.00279135	-0.641763	0.640929	anaphase promoting complex subunit 1	muscle		F
ANAPC10	0.0010809	0.0162887	-0.413174	0.750969	anaphase promoting complex subunit 10	muscle		F
ANAPC13	0.000972734	0.0938698	0.35854	1.28213	anaphase promoting complex subunit 13	muscle		F+M
ANAPC16	0.000450045	0.03686	0.490354	1.40479	anaphase promoting complex subunit 16	muscle		M
ANAPC5	0.000920679	0.024583	0.40317	1.32241	anaphase promoting complex subunit 5	muscle		M
ANK2	0.00433192	0.029453	-0.598607	0.660391	ankyrin 2, neuronal	muscle	duplicate	F
ANK2	0.000622719	0.0147323	-0.718494	0.607732	ankyrin 2, neuronal	nervous	duplicate	F+M
ANK3	0.000630732	0.0257668	0.577305	1.49206	ankyrin 3, node of Ranvier (ankyrin G)	muscle		M
ANKH	0.000458753	0.0215375	-0.327666	0.796825	ankylosis, progressive homolog (mouse)	muscle		F
ANKHD1	3.30425e-05	0.0628161	0.547616	1.46167	ankyrin repeat and KH domain containing 1 /// eukaryotic translation initiation factor 4E binding protein 3	muscle		F+M
ANKHD1-EIF4EBP3	0.0010064	0.094017	0.764208	1.69844	ANKHD1-EIF4EBP3 readthrough transcript /// eukaryotic translation initiation factor 4E binding protein 3	muscle		F+M
ANKRD13C	0.00068129	0.0852093	0.570424	1.48496	ankyrin repeat domain 13C	muscle		F+M
ANKRD19	0.000690472	0.0838746	-0.486222	0.713892	ankyrin repeat domain 19	muscle		F+M
ANKRD29	0.000172606	0.016207	-0.349625	0.784788	ankyrin repeat domain 29	muscle		F
ANKRD36B	0.000156914	0.0693732	0.732585	1.66161	ankyrin repeat domain 36B	muscle		F+M
ANKRD44	0.00052415	0.0826927	-0.737367	0.599833	ankyrin repeat domain 44	muscle		F+M
ANO4	7.10652e-05	0.0614091	-0.270187	0.829212	anoctamin 4	muscle		F+M
ANO6	0.00341439	0.0448617	-0.524304	0.695295	anoctamin 6	muscle		F
ANP32B	0.00259739	0.0216547	0.322331	1.25035	acidic (leucine-rich) nuclear phosphoprotein 32 family, member B	muscle	duplicate	F
ANP32B	0.00122469	0.0966064	0.659861	1.57993	acidic (leucine-rich) nuclear phosphoprotein 32 family, member B	muscle	duplicate	F+M
ANP32B	0.000542131	0.0135144	0.486583	1.40112	acidic (leucine-rich) nuclear phosphoprotein 32 family, member B	nervous	duplicate	F+M
ANXA5	0.00480118	0.0476398	0.593067	1.50845	annexin A5	muscle	duplicate	M
ANXA5	0.00261081	0.0314849	0.478888	1.39367	annexin A5	nervous	duplicate	F+M
AP4S1	0.00421067	0.0291189	-0.348572	0.785361	adaptor-related protein complex 4, sigma 1 subunit	muscle		F
API5	0.00111442	0.0310028	0.487084	1.40161	apoptosis inhibitor 5	muscle		M
APLP2	0.00181743	0.0191839	-0.345215	0.78719	amyloid beta (A4) precursor-like protein 2	muscle		F
APOBEC1	0.00773901	0.038397	-0.360141	0.779088	apolipoprotein B mRNA editing enzyme, catalytic polypeptide 1	muscle		F
APOD	1.78534e-05	0.00331566	0.763591	1.69771	apolipoprotein D	nervous		F+M
APOO	8.76064e-05	0.0090721	-0.558085	0.679203	apolipoprotein O	muscle		F
APOOL	0.00118876	0.0168093	-0.42437	0.745164	apolipoprotein O-like	muscle	duplicate	F
APOOL	0.00508362	0.048943	0.312381	1.24176	apolipoprotein O-like	muscle	duplicate	M
APPBP2	0.00275017	0.0389716	0.488451	1.40294	amyloid beta precursor protein (cytoplasmic tail) binding protein 2	muscle		M
APPL1	0.00060426	0.0225849	-0.650323	0.637137	adaptor protein, phosphotyrosine interaction, PH domain and leucine zipper containing 1	muscle		F
AQP1	4.97062e-05	0.0071695	-0.695795	0.617369	aquaporin 1 (Colton blood group)	muscle		F
ARAF	0.011141	0.0457726	-0.266943	0.831079	v-raf murine sarcoma 3611 viral oncogene homolog	muscle		F
ARAP2	2.38471e-05	0.00601938	0.404253	1.3234	ArfGAP with RhoGAP domain, ankyrin repeat and PH domain 2	muscle	duplicate	F
ARAP2	4.56873e-05	0.00499109	0.321827	1.24991	ArfGAP with RhoGAP domain, ankyrin repeat and PH domain 2	nervous	duplicate	F+M
ARF6	0.000986531	0.0937733	-0.67242	0.627453	ADP-ribosylation factor 6	muscle		F+M
ARFGAP3	0.00163014	0.0325641	0.485694	1.40026	ADP-ribosylation factor GTPase activating protein 3	muscle		M
ARFGEF1	0.0011421	0.0166518	-0.60633	0.656866	ADP-ribosylation factor guanine nucleotide-exchange factor 1(brefeldin A-inhibited)	muscle		F
ARHGAP25	0.00480975	0.047517	-0.356112	0.781267	Rho GTPase activating protein 25	muscle		M
ARHGEF7	0.000355761	0.0121762	-0.341462	0.789241	Rho guanine nucleotide exchange factor (GEF) 7	muscle		F
ARID1B	0.000789086	0.0276161	-0.532434	0.691387	AT rich interactive domain 1B (SWI1-like)	muscle		F
ARL1	0.00301419	0.0259558	-0.425768	0.744443	ADP-ribosylation factor-like 1	muscle		F
ARL15	0.000199252	0.0721508	-0.280893	0.823082	ADP-ribosylation factor-like 15	muscle		F+M
ARL5A	0.00420228	0.0475813	-0.45324	0.730401	ADP-ribosylation factor-like 5A	muscle		F
ARPC5L	0.000172079	0.0165615	-0.380855	0.767982	actin related protein 2/3 complex, subunit 5-like	muscle		F
ARRB2	0.00450058	0.0412755	-0.30142	0.811453	arrestin, beta 2	nervous		F+M
ARTN	0.000610928	0.0844667	-0.31434	0.804219	artemin	muscle		F+M
ARV1	0.0010161	0.0294115	-0.379662	0.768618	ARV1 homolog (S. cerevisiae)	muscle		F
ASAH1	0.00628109	0.049744	0.273075	1.20838	N-acylsphingosine amidohydrolase (acid ceramidase) 1	nervous		F+M
ASB12	0.00346683	0.0444879	-0.382591	0.767059	ankyrin repeat and SOCS box-containing 12	muscle		F
ASB2	0.00278379	0.0420268	-0.674525	0.626538	ankyrin repeat and SOCS box-containing 2	muscle		F
ASB7	4.93309e-06	0.062521	-0.546752	0.684559	ankyrin repeat and SOCS box-containing 7	muscle		F+M
ASF1A	0.000408631	0.0124084	-0.588499	0.665035	ASF1 anti-silencing function 1 homolog A (S. cerevisiae)	muscle		F
ASMTL	0.00467236	0.0305835	0.308087	1.23806	acetylserotonin O-methyltransferase-like	muscle		F
ASNA1	0.00300854	0.0259625	-0.292132	0.816694	arsA arsenite transporter, ATP-binding, homolog 1 (bacterial)	muscle		F
ASPG	0.000114604	0.0660215	-0.674672	0.626475	asparaginase homolog (S. cerevisiae)	muscle		F+M
ATAD1	0.000483219	0.0218855	-0.476813	0.718563	ATPase family, AAA domain containing 1	muscle		F
ATF2	0.00297794	0.0396005	0.534727	1.44867	activating transcription factor 2	muscle		M
ATG14	0.00253948	0.0376323	0.400593	1.32005	ATG14 autophagy related 14 homolog (S. cerevisiae)	muscle		M
ATG16L2	0.000974904	0.0938411	-0.410948	0.752129	ATG16 autophagy related 16-like 2 (S. cerevisiae)	muscle		F+M
ATG2B	0.000500537	0.0816787	0.469997	1.38511	ATG2 autophagy related 2 homolog B (S. cerevisiae)	muscle		F+M
ATG5	0.00398547	0.0267755	-0.360133	0.779093	ATG5 autophagy related 5 homolog (S. cerevisiae)	muscle		F
ATM	0.00360269	0.0277672	-0.28033	0.823403	ataxia telangiectasia mutated	muscle		F
ATN1	0.000644507	0.0862855	-0.380624	0.768105	atrophin 1	muscle		F+M
ATP2A1	0.00107997	0.0943952	-0.931274	0.524395	ATPase, Ca++ transporting, cardiac muscle, fast twitch 1	muscle		F+M
ATP2A3	0.0003752	0.0783827	-0.327335	0.797007	ATPase, Ca++ transporting, ubiquitous	muscle		F+M
ATP2B2	6.99275e-05	0.00557508	-1.00775	0.497321	ATPase, Ca++ transporting, plasma membrane 2	nervous		F+M
ATP2B3	0.00556412	0.0465471	-0.522739	0.696049	ATPase, Ca++ transporting, plasma membrane 3	nervous		F+M
ATP5A1	0.00274676	0.0315862	-0.946218	0.518991	ATP synthase, H+ transporting, mitochondrial F1 complex, alpha subunit 1, cardiac muscle	nervous		F+M
ATP5B	0.000501867	0.0128283	-0.332539	0.794138	ATP synthase, H+ transporting, mitochondrial F1 complex, beta polypeptide	muscle		F
ATP5F1	0.00360097	0.027807	-0.318437	0.801938	ATP synthase, H+ transporting, mitochondrial Fo complex, subunit B1	muscle		F
ATP5G3	0.000354752	0.0123229	-0.398336	0.758733	ATP synthase, H+ transporting, mitochondrial Fo complex, subunit C3 (subunit 9)	muscle		F
ATP5J	0.000342776	0.0120378	-0.263425	0.833108	ATP synthase, H+ transporting, mitochondrial Fo complex, subunit F6	muscle		F
ATP6V0A2	0.00126858	0.0968535	0.333977	1.26048	ATPase, H+ transporting, lysosomal V0 subunit a2	muscle		F+M
ATP6V1C1	0.00649081	0.035714	-0.556397	0.679998	ATPase, H+ transporting, lysosomal 42kDa, V1 subunit C1	muscle		F
ATP6V1F	0.00592129	0.0343099	-0.263617	0.832997	ATPase, H+ transporting, lysosomal 14kDa, V1 subunit F	muscle		F
ATP8B1	0.00817018	0.0392348	0.485988	1.40054	ATPase, aminophospholipid transporter, class I, type 8B, member 1	muscle		F
ATRN	0.000988033	0.0936818	-0.354368	0.782212	attractin	muscle		F+M
ATRX	0.000601285	0.0257225	0.317153	1.24587	alpha thalassemia/mental retardation syndrome X-linked	muscle		M
ATXN1	0.0106414	0.0446284	0.492152	1.40654	ataxin 1	muscle	duplicate	F
ATXN1	0.00158329	0.0321953	0.573373	1.488	ataxin 1	muscle	duplicate	M
ATXN7L1	0.000497466	0.0815274	-0.341452	0.789247	ataxin 7-like 1	muscle		F+M
AUH	0.000459716	0.0128044	-0.396752	0.759566	AU RNA binding protein/enoyl-CoA hydratase	muscle		F
AUTS2	0.00220942	0.0289982	0.30502	1.23544	autism susceptibility candidate 2	nervous		F+M
AVL9	0.00407536	0.0446379	0.494091	1.40843	AVL9 homolog (S. cerevisiase)	muscle		M
AZIN1	0.010491	0.0441809	-0.563537	0.676641	antizyme inhibitor 1	muscle	duplicate	F
AZIN1	0.000760836	0.0158763	-0.606803	0.65665	antizyme inhibitor 1	nervous	duplicate	F+M
B2M	0.000620107	0.0260365	0.332095	1.25884	beta-2-microglobulin	muscle		M
B4GALT1	0.0001076	0.0659853	-0.286076	0.82013	Clone p4betaGT/3 beta-1,4-galactosyltransferase	muscle		F+M
BAG2	0.00431877	0.0294132	-0.483127	0.715425	BCL2-associated athanogene 2	muscle		F
BBOX1	0.000974611	0.0189529	0.63136	1.54902	butyrobetaine (gamma), 2-oxoglutarate dioxygenase (gamma-butyrobetaine hydroxylase) 1	nervous		F+M
BCKDK	0.0097353	0.0420508	-0.346134	0.786689	branched chain ketoacid dehydrogenase kinase	muscle		F
BCL11A	1.05701e-05	0.0024538	-0.945066	0.519406	B-cell CLL/lymphoma 11A (zinc finger protein)	nervous		F+M
BCL2	0.00120488	0.0204352	0.485547	1.40012	B-cell CLL/lymphoma 2	nervous		F+M
BCL2L1	0.000923619	0.0185438	0.28224	1.21608	BCL2-like 1	nervous		F+M
BEX2	0.000618924	0.0849544	1.03967	2.05576	brain expressed X-linked 2	muscle		F+M
BLCAP	0.000422205	0.0125378	0.376469	1.29816	bladder cancer associated protein	muscle		F
BLOC1S2	0.000969377	0.0293846	-0.305442	0.809194	biogenesis of lysosomal organelles complex-1, subunit 2	muscle		F
BMP1	0.00112726	0.0957513	-0.322165	0.799869	bone morphogenetic protein 1	muscle		F+M
BNIP3	0.0115369	0.0465469	-0.38587	0.765317	BCL2/adenovirus E1B 19kDa interacting protein 3	muscle	duplicate	F
BNIP3	0.00326033	0.0412968	0.422289	1.34005	BCL2/adenovirus E1B 19kDa interacting protein 3	muscle	duplicate	M
BNIP3L	0.00470287	0.0471806	0.544245	1.45826	BCL2/adenovirus E1B 19kDa interacting protein 3-like	muscle		M
BOLA3	0.000167752	0.0169948	-0.697407	0.61668	bolA homolog 3 (E. coli)	muscle		F
BPHL	0.000676513	0.0271479	-0.753924	0.592988	biphenyl hydrolase-like (serine hydrolase)	muscle		M
BPY2	0.000271725	0.0754116	-0.374665	0.771284	basic charge, Y-linked, 2	muscle		F+M
BRAF	0.00198509	0.0358783	-0.533741	0.690761	v-raf murine sarcoma viral oncogene homolog B1	muscle		F
BRD2	0.00183652	0.0213406	-0.498938	0.707628	bromodomain containing 2	nervous		F+M
BRD3	0.00061447	0.0141002	0.318283	1.24685	bromodomain containing 3	muscle		F
BRD4	0.00198609	0.0212199	0.324449	1.25219	bromodomain containing 4	muscle		F
BRD8	0.0042763	0.0293716	0.264156	1.20093	bromodomain containing 8	muscle		F
BRP44L	0.000333469	0.0119183	-0.454281	0.729874	brain protein 44-like	muscle		F
BSG	0.00271257	0.0246737	-0.732845	0.601716	basigin (Ok blood group)	muscle		F
BTN3A3	0.00275553	0.0248962	-0.47017	0.721879	butyrophilin, subfamily 3, member A3	muscle		F
BUB3	0.00227424	0.0370962	0.665017	1.58559	budding uninhibited by benzimidazoles 3 homolog (yeast)	muscle		M
BZW1	0.00560884	0.033361	-0.284483	0.821036	basic leucine zipper and W2 domains 1	muscle	duplicate	F
BZW1	0.000983482	0.0297313	0.574628	1.48929	basic leucine zipper and W2 domains 1	muscle	duplicate	M
C10orf40	0.00136074	0.0998788	-0.268753	0.830037	chromosome 10 open reading frame 40	muscle		F+M
C10orf44	4.60534e-05	0.0603799	-0.534244	0.690521	CDNA clone IMAGE:4820778	muscle		F+M
C10orf78	4.53293e-05	0.0638327	0.483579	1.39821	chromosome 10 open reading frame 78	muscle		F+M
C11orf20	0.000444595	0.0126448	-0.351628	0.783699	chromosome 11 open reading frame 20	muscle		F
C11orf21	0.00114571	0.0961622	-0.529902	0.692602	chromosome 11 open reading frame 21	muscle		F+M
C11orf24	0.000510428	0.0822338	-0.574504	0.671517	chromosome 11 open reading frame 24	muscle		F+M
C11orf40	0.00121061	0.0964971	-0.469859	0.722035	chromosome 11 open reading frame 40	muscle		F+M
C11orf58	0.000938298	0.0296082	-0.286687	0.819782	chromosome 11 open reading frame 58	muscle		F
C11orf73	0.0114201	0.0463071	-0.321228	0.800389	chromosome 11 open reading frame 73	muscle		F
C11orf74	0.000168754	0.0166579	-0.33978	0.790162	chromosome 11 open reading frame 74	muscle		F
C12orf73	0.000673058	0.0224346	-0.364926	0.776509	chromosome 12 open reading frame 73	muscle		F
C13orf33	0.00139243	0.099703	0.835164	1.78406	Chromosome 13 open reading frame 33, mRNA (cDNA clone MGC:48970 IMAGE:5590156)	muscle		F+M
C14orf105	0.000802415	0.0879221	-0.452908	0.730569	chromosome 14 open reading frame 105	muscle		F+M
C14orf109	0.000403943	0.0126464	-0.395125	0.760423	chromosome 14 open reading frame 109	muscle		F
C14orf139	0.00418541	0.0452962	0.580812	1.49569	chromosome 14 open reading frame 139	muscle		M
C14orf147	0.00647491	0.0357728	-0.394294	0.760862	chromosome 14 open reading frame 147	muscle		F
C14orf153	0.00428624	0.0482482	-0.266704	0.831216	chromosome 14 open reading frame 153	muscle		F
C14orf167	0.00257626	0.0413247	-0.399197	0.75828	chromosome 14 open reading frame 167	muscle		F
C15orf37	0.000372324	0.0786461	0.498247	1.4125	chromosome 15 open reading frame 37	muscle		F+M
C15orf42	2.77054e-05	0.0619647	-0.382838	0.766928	chromosome 15 open reading frame 42	muscle		F+M
C15orf63	0.00390079	0.0444435	0.499701	1.41392	chromosome 15 open reading frame 63	muscle		M
C16orf61	8.33525e-05	0.00885873	-0.475652	0.719142	chromosome 16 open reading frame 61	muscle		F
C17orf80	0.00450519	0.0484463	-0.420466	0.747183	chromosome 17 open reading frame 80	muscle		F
C18orf19	0.00318261	0.0372507	-0.580877	0.668557	chromosome 18 open reading frame 19	muscle		F
C18orf32	0.000470707	0.0215726	-0.599284	0.660082	chromosome 18 open reading frame 32	muscle		F
C18orf55	0.000283755	0.0169656	-0.522419	0.696203	chromosome 18 open reading frame 55	muscle		F
C19orf2	0.000721103	0.0833355	0.545673	1.4597	Chromosome 19 open reading frame 2, mRNA (cDNA clone IMAGE:4821488)	muscle		F+M
C19orf42	0.00294001	0.0430352	-0.348779	0.785248	chromosome 19 open reading frame 42	muscle		F
C19orf60	0.00418998	0.0452377	0.428853	1.34616	chromosome 19 open reading frame 60	muscle		M
C1orf151	0.00049921	0.0213536	-0.425844	0.744403	chromosome 1 open reading frame 151	muscle		F
C1QBP	0.000778125	0.0149646	-0.348406	0.785452	complement component 1, q subcomponent binding protein	muscle		F
C1S	0.00292092	0.0393032	0.728602	1.65703	complement component 1, s subcomponent	muscle		M
C20orf24	0.00408217	0.0470516	-0.279483	0.823886	chromosome 20 open reading frame 24	muscle		F
C20orf3	5.91972e-06	0.0268435	0.51369	1.4277	chromosome 20 open reading frame 3	muscle		M
C20orf7	0.00189718	0.0353906	-0.417939	0.748493	chromosome 20 open reading frame 7	muscle		F
C20orf70	0.00270838	0.0418736	-0.414026	0.750526	chromosome 20 open reading frame 70	muscle		F
C20orf72	0.003443	0.0446284	-0.366668	0.775572	chromosome 20 open reading frame 72	muscle		F
C21orf33	0.00140904	0.0184163	-0.416329	0.749329	chromosome 21 open reading frame 33	muscle		F
C21orf7	0.00469368	0.0306238	0.482118	1.39679	chromosome 21 open reading frame 7	muscle	duplicate	F
C21orf7	4.96776e-05	0.0150179	1.00186	2.00258	chromosome 21 open reading frame 7	muscle	duplicate	M
C22orf30	0.00107138	0.0303273	-0.290514	0.817611	chromosome 22 open reading frame 30	muscle		F
C2CD3	0.000924467	0.0929882	-0.542528	0.686567	C2 calcium-dependent domain containing 3	muscle		F+M
C2orf7	0.00110535	0.0297573	-0.364871	0.776538	chromosome 2 open reading frame 7	muscle		F
C2orf79	0.00209591	0.0363454	-0.343612	0.788066	chromosome 2 open reading frame 79	muscle		F
C2orf88	0.003682	0.0452867	-0.405307	0.755075	chromosome 2 open reading frame 88	muscle		F
C3orf15	8.14764e-06	0.061957	-0.513012	0.700758	chromosome 3 open reading frame 15	muscle		F+M
C3orf17	0.00233773	0.0384599	-0.557505	0.679476	chromosome 3 open reading frame 17	muscle		F
C3orf26	0.00137922	0.0996959	0.825645	1.77233	chromosome 3 open reading frame 26	muscle		F+M
C3orf37	0.000459322	0.0247957	0.402733	1.32201	chromosome 3 open reading frame 37	muscle		M
C3orf63	0.00137806	0.0312448	0.416923	1.33508	chromosome 3 open reading frame 63	muscle	duplicate	M
C3orf63	0.00353546	0.0353957	0.551879	1.46599	chromosome 3 open reading frame 63	nervous	duplicate	F+M
C3orf75	0.000318879	0.0177913	-0.32134	0.800326	chromosome 3 open reading frame 75	muscle		F
C3orf78	0.000557925	0.0383517	-0.588427	0.665068	chromosome 3 open reading frame 78	muscle		M
C4orf38	0.000115679	0.0153563	-0.428148	0.743215	chromosome 4 open reading frame 38	muscle		F
C4orf44	0.00444016	0.0482865	-0.435954	0.739205	chromosome 4 open reading frame 44	muscle		F
C5orf13	0.00223055	0.0223534	-0.601287	0.659166	chromosome 5 open reading frame 13	muscle	duplicate	F
C5orf13	0.00104741	0.09437	-0.65738	0.634029	chromosome 5 open reading frame 13	muscle	duplicate	F+M
C5orf28	1.40969e-05	0.0535983	0.535092	1.44903	CDNA FLJ36759 fis, clone UTERU2018566	muscle		F+M
C5orf30	0.000254655	0.00900828	-0.703275	0.614177	chromosome 5 open reading frame 30	nervous		F+M
C5orf33	3.27566e-05	0.0132524	-0.659712	0.633005	chromosome 5 open reading frame 33	muscle		F
C5orf43	0.00037328	0.0334166	0.472095	1.38712	chromosome 5 open reading frame 43	muscle		M
C5orf44	0.00243238	0.0373893	0.638736	1.55696	chromosome 5 open reading frame 44	muscle		M
C6orf106	0.000735391	0.0158807	-0.334791	0.792899	chromosome 6 open reading frame 106	nervous		F+M
C6orf136	0.00484748	0.0456321	-0.387325	0.764546	chromosome 6 open reading frame 136	muscle		F
C6orf150	0.000393396	0.079561	0.589831	1.50507	chromosome 6 open reading frame 150	muscle		F+M
C6orf203	0.00203928	0.0363457	-0.38247	0.767123	chromosome 6 open reading frame 203	muscle		F
C6orf225	0.00115084	0.0295361	-0.292036	0.816749	chromosome 6 open reading frame 225	muscle		F
C6orf62	0.00140998	0.0183691	0.2758	1.21067	chromosome 6 open reading frame 62	muscle		F
C7orf28B	0.00141324	0.0182936	-0.435519	0.739428	chromosome 7 open reading frame 28B///CCZ1 vacuolar protein trafficking and biogenesis associated homolog (S. cerevisiae)	muscle		F
C7orf41	0.000830008	0.0886463	1.29146	2.44776	chromosome 7 open reading frame 41	muscle		F+M
C7orf44	9.63508e-05	0.00904948	-0.442217	0.736002	chromosome 7 open reading frame 44	muscle		F
C7orf68	0.00511087	0.0491011	-0.332903	0.793937	chromosome 7 open reading frame 68	muscle		M
C8orf38	7.33591e-05	0.0117672	-0.349891	0.784643	chromosome 8 open reading frame 38	muscle		F
C9orf123	0.000564172	0.0226241	-0.337491	0.791416	chromosome 9 open reading frame 123	muscle		F
C9orf41	0.00123768	0.0962337	-0.603882	0.657981	chromosome 9 open reading frame 41	muscle		F+M
C9orf5	0.00080482	0.0876802	0.752549	1.68477	chromosome 9 open reading frame 5	muscle		F+M
C9orf75	0.000512313	0.0821893	-0.622145	0.649704	chromosome 9 open reading frame 75	muscle		F+M
CA2	0.00424821	0.0293283	-0.532174	0.691512	carbonic anhydrase II	muscle		F
CA3	0.000534298	0.0242282	0.569315	1.48382	carbonic anhydrase III, muscle specific	muscle		M
CA4	0.00109874	0.0163141	-0.41787	0.748529	carbonic anhydrase IV	muscle	duplicate	F
CA4	0.000660535	0.0854234	-0.597818	0.660753	carbonic anhydrase IV	muscle	duplicate	F+M
CA5BL	0.000715716	0.0837308	0.390243	1.31061	CDNA FLJ38289 fis, clone FCBBF3008475	muscle		F+M
CAB39	0.0028271	0.0390846	0.341369	1.26696	calcium binding protein 39	muscle		M
CABP4	0.00109879	0.0953825	-0.295263	0.814924	calcium binding protein 4	muscle		F+M
CACNA1I	0.00120097	0.029759	0.402351	1.32166	calcium channel, voltage-dependent, T type, alpha 1I subunit	muscle		M
CACNB2	4.95627e-06	0.00204546	-0.628089	0.647033	calcium channel, voltage-dependent, beta 2 subunit	nervous		F+M
CACYBP	8.32532e-05	0.0608731	-0.454558	0.729734	calcyclin binding protein	muscle		F+M
CADM1	0.00151103	0.0233852	0.370427	1.29274	cell adhesion molecule 1	nervous		F+M
CALB1	0.000706987	0.0158191	-0.698186	0.616346	calbindin 1, 28kDa	nervous		F+M
CALB2	0.00410561	0.0393029	-0.516464	0.699083	calbindin 2	nervous		F+M
CALM1	0.00219341	0.0289929	-0.831838	0.561813	calmodulin 1 (phosphorylase kinase, delta)	nervous		F+M
CALM3	6.15958e-05	0.00558015	-1.49915	0.353761	calmodulin 3 (phosphorylase kinase, delta)///calmodulin 2 (phosphorylase kinase, delta)///calmodulin 1 (phosphorylase kinase, delta)	nervous		F+M
CAMK2A	0.00304065	0.0332175	-0.693331	0.618424	calcium/calmodulin-dependent protein kinase II alpha	nervous		F+M
CAMLG	0.00809852	0.0391702	0.326899	1.25431	calcium modulating ligand	muscle		F
CANX	0.00629238	0.0352954	-0.485	0.714497	calnexin	muscle		F
CAP2	0.00818165	0.0451738	-0.751968	0.593793	CAP, adenylate cyclase-associated protein, 2 (yeast)	nervous		F+M
CAPN2	0.000416481	0.0118087	0.295739	1.22751	calpain 2, (m/II) large subunit	nervous		F+M
CAPN9	0.000963535	0.0949092	-0.2926	0.81643	calpain 9	muscle		F+M
CAPRIN1	0.00219771	0.0211789	-0.491667	0.711203	cell cycle associated protein 1	muscle		F
CAPZA2	0.00530388	0.0463308	0.415874	1.33411	capping protein (actin filament) muscle Z-line, alpha 2	muscle		M
CARD14	0.000396729	0.0798107	-0.450964	0.731554	caspase recruitment domain family, member 14	muscle		F+M
CASP1	0.000298625	0.0762024	0.457723	1.37337	caspase 1, apoptosis-related cysteine peptidase (interleukin 1, beta, convertase)	muscle		F+M
CASQ1	0.000378331	0.0786048	-0.560643	0.678	calsequestrin 1 (fast-twitch, skeletal muscle)	muscle		F+M
CAT	0.00413875	0.0395183	0.415982	1.33421	catalase	nervous		F+M
CATSPER1	0.00100947	0.0940721	-0.703561	0.614055	cation channel, sperm associated 1	muscle		F+M
CBFA2T2	2.24317e-05	0.0123356	0.714988	1.64147	core-binding factor, runt domain, alpha subunit 2; translocated to, 2	muscle		M
CBFB	0.00121566	0.0204315	0.354552	1.27859	core-binding factor, beta subunit	nervous		F+M
CBX3	0.00313781	0.0262915	-0.387067	0.764682	chromobox homolog 3	muscle		F
CBX7	1.5969e-05	0.00586301	0.437177	1.35395	chromobox homolog 7	muscle		F
CC2D1A	0.00394895	0.044434	0.388922	1.30941	coiled-coil and C2 domain containing 1A	muscle		M
CCDC117	0.000812069	0.0453044	0.610535	1.52683	coiled-coil domain containing 117	muscle		M
CCDC123	0.00023407	0.0754209	-0.303737	0.810151	MRNA; cDNA DKFZp686G1614 (from clone DKFZp686G1614)	muscle		F+M
CCDC18	0.00144223	0.0313685	-0.37209	0.772663	coiled-coil domain containing 18	muscle		F
CCDC28A	0.00140374	0.0310507	0.623654	1.54077	coiled-coil domain containing 28A	muscle		M
CCDC28B	0.00555617	0.0333424	-0.293329	0.816017	coiled-coil domain containing 28B	muscle		F
CCDC90A	0.00062471	0.0140166	-0.437824	0.738247	coiled-coil domain containing 90A	muscle		F
CCHCR1	0.00427189	0.0294173	-0.345322	0.787132	coiled-coil alpha-helical rod protein 1	muscle		F
CCNB1IP1	0.000557398	0.0824632	0.424674	1.34227	cyclin B1 interacting protein 1	muscle		F+M
CCT3	0.0038613	0.0444401	0.409983	1.32867	chaperonin containing TCP1, subunit 3 (gamma)	muscle		M
CCT6A	0.00119811	0.0303518	0.406112	1.32511	chaperonin containing TCP1, subunit 6A (zeta 1)	muscle		M
CD37	8.87664e-05	0.0613641	-0.455331	0.729343	CD37 molecule	muscle		F+M
CD46	0.00220133	0.022226	-0.287628	0.819248	CD46 molecule, complement regulatory protein	muscle		F
CD59	0.00242707	0.0377636	0.361057	1.28437	CD59 molecule, complement regulatory protein	muscle		M
CD72	0.000566503	0.0828433	-0.272362	0.827963	CD72 molecule	muscle		F+M
CD8A	0.00114976	0.0962893	-0.731998	0.60207	CD8a molecule	muscle		F+M
CDC37L1	0.00446055	0.0482357	-0.320642	0.800713	cell division cycle 37 homolog (S. cerevisiae)-like 1	muscle		F
CDC42BPA	8.30441e-06	0.0125524	0.798398	1.73917	CDC42 binding protein kinase alpha (DMPK-like)	muscle		M
CDC42EP3	0.000790585	0.029628	0.666329	1.58703	CDC42 effector protein (Rho GTPase binding) 3	muscle		M
CDC73	0.00363051	0.0432097	0.698036	1.62229	cell division cycle 73, Paf1/RNA polymerase II complex component, homolog (S. cerevisiae)	muscle		M
CDH13	0.000853827	0.0288937	0.591125	1.50642	cadherin 13, H-cadherin (heart)	muscle		M
CDH22	0.000489236	0.0128878	-0.490184	0.711935	cadherin 22, type 2	nervous		F+M
CDH5	0.00660865	0.0361654	-0.4771	0.71842	cadherin 5, type 2 (vascular endothelium)	muscle		F
CDK12	1.90745e-05	0.0122376	-0.298797	0.81293	cyclin-dependent kinase 12	muscle		M
CDK16	0.00412101	0.028974	-0.344465	0.7876	cyclin-dependent kinase 16	muscle		F
CDK17	0.00310282	0.033383	-0.810194	0.570305	cyclin-dependent kinase 17	nervous		F+M
CDK2AP1	0.00494821	0.0311278	-0.334777	0.792907	cyclin-dependent kinase 2 associated protein 1	muscle		F
CDK8	0.000710356	0.0156123	-0.307141	0.808242	cyclin-dependent kinase 8	nervous		F+M
CDKN1C	0.00525235	0.0319609	0.494848	1.40917	cyclin-dependent kinase inhibitor 1C (p57, Kip2)	muscle		F
CDKN2AIPNL	5.53586e-05	0.0118398	-0.556641	0.679883	CDKN2A interacting protein N-terminal like	muscle		F
CDKN2B	3.55683e-05	0.0614709	1.38348	2.60896	cyclin-dependent kinase inhibitor 2B (p15, inhibits CDK4)	muscle		F+M
CDV3	0.00181375	0.026011	-0.381293	0.767749	CDV3 homolog (mouse)	nervous		F+M
CEBPB	0.00525514	0.0321085	0.368922	1.29139	CCAAT/enhancer binding protein (C/EBP), beta	muscle		F
CEBPD	0.00263155	0.0314289	0.623162	1.54025	CCAAT/enhancer binding protein (C/EBP), delta	nervous		F+M
CEBPG	0.010286	0.043774	-0.400041	0.757837	CCAAT/enhancer binding protein (C/EBP), gamma	muscle		F
CENPJ	7.43593e-06	0.0706812	-0.63443	0.644195	centromere protein J	muscle		F+M
CENPV	0.000198771	0.0162812	-0.51697	0.698838	centromere protein V	muscle		F
CEP170	0.00333589	0.0346104	0.460191	1.37572	centrosomal protein 170kDa	nervous		F+M
CETN2	0.00538878	0.0494654	0.441555	1.35807	centrin, EF-hand protein, 2	muscle		M
CETN3	0.00119525	0.0203649	0.536306	1.45025	centrin, EF-hand protein, 3	nervous		F+M
CFD	0.00245478	0.0371048	0.594011	1.50944	complement factor D (adipsin)	muscle		M
CFDP1	0.00288465	0.0322726	0.298112	1.22953	craniofacial development protein 1	nervous		F+M
CFHR1	0.00571603	0.0472854	0.861186	1.81653	complement factor H-related 1///complement factor H	nervous		F+M
CFL2	0.00321502	0.0414819	-0.42893	0.742812	cofilin 2 (muscle)	muscle		F
CFLAR	0.00500426	0.0492514	0.476246	1.39112	CASP8 and FADD-like apoptosis regulator	muscle		M
CHCHD10	0.00445172	0.0482758	-0.405846	0.754794	coiled-coil-helix-coiled-coil-helix domain containing 10	muscle		F
CHCHD3	0.000234573	0.0115532	-0.360925	0.778665	coiled-coil-helix-coiled-coil-helix domain containing 3	muscle		F
CHCHD6	0.000363057	0.0788796	-0.366183	0.775833	coiled-coil-helix-coiled-coil-helix domain containing 6	muscle		F+M
CHCHD7	7.35676e-05	0.0608075	0.459034	1.37462	coiled-coil-helix-coiled-coil-helix domain containing 7	muscle		F+M
CHERP	1.8088e-05	0.057311	-0.369206	0.774208	calcium homeostasis endoplasmic reticulum protein	muscle		F+M
CHML	0.000669701	0.0845946	0.591888	1.50722	choroideremia-like (Rab escort protein 2)	muscle		F+M
CHMP5	0.0019573	0.0346702	0.693243	1.61691	chromatin modifying protein 5	muscle		M
CHPT1	0.0127537	0.0491955	-0.290264	0.817752	choline phosphotransferase 1	muscle		F
CHRNA6	0.0116048	0.0464959	-0.27524	0.826313	cholinergic receptor, nicotinic, alpha 6	muscle		F
CIC	0.00399383	0.0448278	0.469761	1.38488	capicua homolog (Drosophila)	muscle		M
CIDEC	0.00125251	0.0172056	0.328408	1.25563	cell death-inducing DFFA-like effector c	muscle		F
CIRBP	0.00386628	0.0269318	0.266736	1.20308	cold inducible RNA binding protein	muscle	duplicate	F
CIRBP	0.0016519	0.0309088	0.487871	1.40237	cold inducible RNA binding protein	muscle	duplicate	M
CISD1	0.007662	0.0383447	-0.333171	0.79379	CDGSH iron sulfur domain 1	muscle		F
CKMT2	3.34355e-05	0.00643021	-0.579865	0.669026	creatine kinase, mitochondrial 2 (sarcomeric)	muscle		F
CLIC4	0.000708384	0.0157554	0.798569	1.73938	chloride intracellular channel 4	nervous		F+M
CLINT1	0.00209312	0.0217311	-0.407944	0.753697	clathrin interactor 1	muscle		F
CLK4	0.000819577	0.0299714	0.415428	1.33369	CDC-like kinase 4	muscle		M
CLN8	0.000397872	0.0792023	-0.523892	0.695493	ceroid-lipofuscinosis, neuronal 8 (epilepsy, progressive with mental retardation)	muscle		F+M
CLPTM1	0.00334095	0.0271487	-0.399023	0.758372	cleft lip and palate associated transmembrane protein 1	muscle		F
CLTA	0.00222413	0.0366747	0.368523	1.29103	clathrin, light chain A	muscle		M
CLTB	0.00105506	0.0195941	-0.578044	0.669872	clathrin, light chain B	nervous		F+M
CLTCL1	0.00295894	0.025644	0.293682	1.22576	clathrin, heavy chain-like 1	muscle		F
CMC1	0.000937529	0.0298284	-0.513367	0.700585	COX assembly mitochondrial protein homolog (S. cerevisiae)	muscle		F
CNIH4	0.00348047	0.0402458	-0.287473	0.819336	cornichon homolog 4 (Drosophila)	muscle		F
CNKSR2	0.000442812	0.0213088	-0.999817	0.500063	connector enhancer of kinase suppressor of Ras 2	muscle		F
CNOT6L	0.000864799	0.0449863	0.329198	1.25631	CCR4-NOT transcription complex, subunit 6-like	muscle		M
CNTN1	0.000335995	0.0103999	-0.932737	0.523864	contactin 1	nervous		F+M
COG3	0.00069332	0.0836858	0.279225	1.21354	component of oligomeric golgi complex 3	muscle		F+M
COG7	0.000778336	0.0865305	-0.3186	0.801848	component of oligomeric golgi complex 7	muscle		F+M
COG8	0.00140079	0.0311374	0.496598	1.41088	component of oligomeric golgi complex 8///peptide deformylase (mitochondrial)	muscle		M
COL25A1	0.000557081	0.0827383	0.422298	1.34006	collagen, type XXV, alpha 1	muscle		F+M
COL3A1	0.0106942	0.0447566	-0.659522	0.633088	collagen, type III, alpha 1	muscle		F
COL4A5	2.78044e-05	0.0140091	0.519342	1.4333	collagen, type IV, alpha 5	muscle		M
COMMD10	0.00268995	0.0417565	-0.535144	0.69009	COMM domain containing 10	muscle		F
COMT	0.00119928	0.0302124	0.566759	1.48119	catechol-O-methyltransferase	muscle	duplicate	M
COMT	0.000135707	0.00681158	0.370843	1.29311	catechol-O-methyltransferase	nervous	duplicate	F+M
COPA	0.00350705	0.0424081	0.717803	1.64468	coatomer protein complex, subunit alpha	muscle		M
COPS4	0.000467427	0.0249364	0.27602	1.21085	COP9 constitutive photomorphogenic homolog subunit 4 (Arabidopsis)	muscle		M
COPS8	0.00259952	0.0214988	-0.539749	0.687891	COP9 constitutive photomorphogenic homolog subunit 8 (Arabidopsis)	muscle		F
COQ3	0.00438915	0.0484157	-0.446149	0.734	coenzyme Q3 homolog, methyltransferase (S. cerevisiae)	muscle		F
COQ9	0.000202783	0.0113746	-0.532184	0.691507	coenzyme Q9 homolog (S. cerevisiae)	muscle		F
COX11	0.00642756	0.0356575	-0.34867	0.785307	COX11 cytochrome c oxidase assembly homolog (yeast)	muscle		F
COX4I1	0.00420589	0.0474825	-0.366458	0.775684	cytochrome c oxidase subunit IV isoform 1	muscle		F
COX7B	0.000604613	0.0141966	-0.263103	0.833294	cytochrome c oxidase subunit VIIb	muscle		F
COX7C	4.3306e-05	0.00672685	-0.3676	0.775071	cytochrome c oxidase subunit VIIc	muscle		F
CP	3.07119e-07	0.00118224	0.879478	1.83971	ceruloplasmin (ferroxidase)	muscle		M
CPSF6	0.00455539	0.0472697	0.482894	1.39754	cleavage and polyadenylation specific factor 6, 68kDa	muscle		M
CPSF7	0.00151689	0.0186774	0.264408	1.20114	cleavage and polyadenylation specific factor 7, 59kDa	muscle		F
CRADD	0.00195138	0.02096	-0.294265	0.815487	CASP2 and RIPK1 domain containing adaptor with death domain	muscle		F
CREBBP	0.000954307	0.0296397	0.541484	1.45547	CREB binding protein	muscle		M
CREBL2	0.00266026	0.0387885	0.370277	1.2926	cAMP responsive element binding protein-like 2	muscle		M
CRH	0.00170844	0.0253828	-0.86641	0.54851	corticotropin releasing hormone	nervous		F+M
CRIPAK	0.000191908	0.0160608	0.302559	1.23333	cysteine-rich PAK1 inhibitor	muscle	duplicate	F
CRIPAK	0.000192948	0.0705401	0.549537	1.46362	cysteine-rich PAK1 inhibitor	muscle	duplicate	F+M
CRIPT	0.00302263	0.043181	-0.391892	0.76213	cysteine-rich PDZ-binding protein	muscle		F
CRNKL1	0.000487463	0.0248365	0.562169	1.47649	crooked neck pre-mRNA splicing factor-like 1 (Drosophila)	muscle		M
CRYAB	0.00211938	0.0238509	0.685433	1.60818	crystallin, alpha B	nervous		F+M
CRYZ	0.00106595	0.0163689	-0.401476	0.757083	crystallin, zeta (quinone reductase)	muscle		F
CRYZL1	0.00326317	0.0447058	-0.31556	0.803539	crystallin, zeta (quinone reductase)-like 1	muscle		F
CSDE1	0.00148119	0.0186355	0.289693	1.22238	cold shock domain containing E1, RNA-binding	muscle		F
CSMD1	0.000362244	0.0791553	-0.382893	0.766898	CUB and Sushi multiple domains 1	muscle		F+M
CSPP1	0.000725972	0.0436653	0.705895	1.63116	centrosome and spindle pole associated protein 1	muscle		M
CSRP1	0.00286428	0.0323369	0.468452	1.38362	cysteine and glycine-rich protein 1	nervous		F+M
CST11	0.0010018	0.0938178	-0.840447	0.558471	cystatin 11	muscle		F+M
CSTB	0.00491341	0.043556	0.301874	1.23274	cystatin B (stefin B)	nervous		F+M
CTAGE4	4.68057e-05	0.0593206	-0.677266	0.625349	CTAGE family, member 4	muscle		F+M
CTAGE5	0.00133654	0.0179329	-0.584252	0.666995	CTAGE family, member 5	muscle		F
CTBS	0.0114163	0.0463382	0.32926	1.25637	chitobiase, di-N-acetyl-	muscle		F
CTH	0.00236214	0.0229323	0.298529	1.22989	cystathionase (cystathionine gamma-lyase)	muscle	duplicate	F
CTH	0.000712151	0.084352	0.821875	1.7677	cystathionase (cystathionine gamma-lyase)	muscle	duplicate	F+M
CTNNA1	0.00453998	0.0472178	0.631137	1.54879	catenin (cadherin-associated protein), alpha 1, 102kDa	muscle		M
CTNNBIP1	0.00199682	0.0348261	-0.459863	0.727055	catenin, beta interacting protein 1	muscle		M
CTSB	0.00867783	0.0402373	0.456355	1.37207	cathepsin B	muscle		F
CTSF	0.0093867	0.0412959	0.312177	1.24158	cathepsin F	muscle		F
CUX2	0.00296472	0.0328713	-0.705621	0.613178	cut-like homeobox 2	nervous		F+M
CXorf23	0.000358552	0.0336639	0.40767	1.32654	chromosome X open reading frame 23	muscle		M
CXorf40A	0.00279287	0.0249545	-0.319965	0.801089	chromosome X open reading frame 40A	muscle		F
CXorf40B	0.00819465	0.0392125	-0.27351	0.827304	chromosome X open reading frame 40B///chromosome X open reading frame 40A	muscle		F
CXorf51	0.000605623	0.0843467	-0.375318	0.770935	chromosome X open reading frame 51	muscle		F+M
CXorf57	0.000944998	0.0938125	1.1306	2.1895	chromosome X open reading frame 57	muscle		F+M
CXXC4	0.00107601	0.094266	-0.288684	0.818648	CXXC finger 4	muscle		F+M
CYB5B	0.0042543	0.0293202	-0.298935	0.812852	cytochrome b5 type B (outer mitochondrial membrane)	muscle		F
CYB5D2	0.000476743	0.0359841	-0.567552	0.674761	cytochrome b5 domain containing 2	muscle		M
CYB5R3	0.000120487	0.00954129	0.38089	1.30215	cytochrome b5 reductase 3	muscle		F
CYBB	0.000929479	0.0157065	0.272779	1.20813	cytochrome b-245, beta polypeptide	muscle		F
CYC1	0.00166138	0.0191161	-0.336288	0.792077	cytochrome c-1	muscle		F
CYCS	0.000254875	0.0116972	-0.430799	0.741851	cytochrome c, somatic	muscle		F
CYP11B1	0.000568965	0.0825681	-0.334092	0.793283	cytochrome P450, family 11, subfamily B, polypeptide 1	muscle		F+M
CYP1B1	0.000553115	0.0831464	0.782876	1.72056	cytochrome P450, family 1, subfamily B, polypeptide 1	muscle		F+M
CYP2S1	0.00126447	0.0304243	-0.286498	0.81989	cytochrome P450, family 2, subfamily S, polypeptide 1	muscle		F
CYP39A1	0.000457571	0.0816784	-0.304821	0.809543	cytochrome P450, family 39, subfamily A, polypeptide 1	muscle		F+M
CYTH1	7.47725e-05	0.0592282	0.50474	1.41887	cytohesin 1	muscle		F+M
D4S234E	0.00196477	0.0271293	-0.514749	0.699915	DNA segment on chromosome 4 (unique) 234 expressed sequence	nervous		F+M
DAAM2	0.0032479	0.0268244	-0.363117	0.777483	dishevelled associated activator of morphogenesis 2	muscle		F
DARS	0.00514393	0.0445366	0.366939	1.28961	aspartyl-tRNA synthetase	nervous		F+M
DAZAP1	0.00410209	0.0449476	0.267661	1.20385	DAZ associated protein 1	muscle		F
DBT	0.00655408	0.0359642	0.404893	1.32399	dihydrolipoamide branched chain transacylase E2	muscle		F
DCAF5	0.00272824	0.0418447	-0.303339	0.810375	DDB1 and CUL4 associated factor 5	muscle		F
DCLK2	0.000488822	0.0815163	-0.547743	0.68409	Doublecortin-like kinase 2, mRNA (cDNA clone IMAGE:4943185)	muscle		F+M
DCUN1D2	0.00309164	0.0402855	0.44639	1.36263	DCN1, defective in cullin neddylation 1, domain containing 2 (S. cerevisiae)	muscle		M
DDAH1	0.000601086	0.0142799	0.468687	1.38385	dimethylarginine dimethylaminohydrolase 1	muscle		F
DDB1	0.000429844	0.024673	0.430762	1.34795	damage-specific DNA binding protein 1, 127kDa	muscle		M
DDIT4	0.00129796	0.021332	0.912218	1.88194	DNA-damage-inducible transcript 4	nervous		F+M
DDN	0.00322155	0.0411505	1.03429	2.0481	dendrin	muscle		M
DDR1	0.000731133	0.0135808	0.508871	1.42294	discoidin domain receptor tyrosine kinase 1	nervous		F+M
DDX17	0.000883003	0.015641	0.297813	1.22928	DEAD (Asp-Glu-Ala-Asp) box polypeptide 17	muscle	duplicate	F
DDX17	0.00349771	0.0424082	0.392469	1.31264	DEAD (Asp-Glu-Ala-Asp) box polypeptide 17	muscle	duplicate	M
DDX18	0.0107178	0.044809	-0.281156	0.822931	DEAD (Asp-Glu-Ala-Asp) box polypeptide 18	muscle	duplicate	F
DDX18	0.00503035	0.0441709	-0.342045	0.788922	DEAD (Asp-Glu-Ala-Asp) box polypeptide 18	nervous	duplicate	F+M
DDX19B	0.000470509	0.0126639	-0.33659	0.791911	DEAD (Asp-Glu-Ala-As) box polypeptide 19B	nervous		F+M
DDX23	0.000616871	0.0261426	0.468729	1.38389	DEAD (Asp-Glu-Ala-Asp) box polypeptide 23	muscle		M
DDX3X	0.00935192	0.0414135	-0.736632	0.600139	DEAD (Asp-Glu-Ala-Asp) box polypeptide 3, X-linked	muscle	duplicate	F
DDX3X	0.000211525	0.00827021	-0.825195	0.564406	DEAD (Asp-Glu-Ala-Asp) box polypeptide 3, X-linked	nervous	duplicate	F+M
DDX42	0.000501195	0.0128927	0.306833	1.23699	DEAD (Asp-Glu-Ala-Asp) box polypeptide 42	muscle	duplicate	F
DDX42	0.00120226	0.0296291	0.6112	1.52753	DEAD (Asp-Glu-Ala-Asp) box polypeptide 42	muscle	duplicate	M
DDX49	0.0006856	0.0849104	-0.671751	0.627744	DEAD (Asp-Glu-Ala-Asp) box polypeptide 49	muscle		F+M
DDX5	0.00284905	0.0389135	0.407578	1.32646	DEAD (Asp-Glu-Ala-Asp) box polypeptide 5	muscle		M
DDX54	0.000663529	0.0846588	0.464239	1.37959	DEAD (Asp-Glu-Ala-Asp) box polypeptide 54	muscle		F+M
DECR1	0.00160854	0.0190508	-0.489721	0.712163	2,4-dienoyl CoA reductase 1, mitochondrial	muscle		F
DENND1C	0.000467727	0.0815764	-0.830504	0.562333	DENN/MADD domain containing 1C	muscle		F+M
DERL1	0.00475317	0.0498595	-0.343962	0.787874	Der1-like domain family, member 1	muscle	duplicate	F
DERL1	0.00716857	0.0472033	0.741251	1.67162	Der1-like domain family, member 1	muscle	duplicate	M
DERL2	0.000343971	0.0797456	-0.57822	0.66979	Der1-like domain family, member 2	muscle		F+M
DGCR2	0.00260132	0.0242069	0.489181	1.40365	DiGeorge syndrome critical region gene 2	muscle		F
DGCR7	0.000243165	0.0751664	-0.423173	0.745783	DiGeorge syndrome critical region gene 7	muscle		F+M
DGKB	0.00218346	0.0289645	-0.286837	0.819697	diacylglycerol kinase, beta 90kDa	nervous		F+M
DHRS3	0.00335957	0.0346625	0.500758	1.41496	dehydrogenase/reductase (SDR family) member 3	nervous		F+M
DHRS4L2	0.000712073	0.0283242	-0.636093	0.643453	dehydrogenase/reductase (SDR family) member 4 like 2///dehydrogenase/reductase (SDR family) member 4	muscle		M
DHRS7	0.00267918	0.0311953	0.296544	1.2282	dehydrogenase/reductase (SDR family) member 7	nervous		F+M
DHX40	0.00192355	0.0347511	0.369487	1.29189	DEAH (Asp-Glu-Ala-His) box polypeptide 40	muscle		M
DICER1	0.00795694	0.0484729	0.417841	1.33593	dicer 1, ribonuclease type III	muscle		M
DIRC2	0.00106831	0.0304645	-0.567001	0.675018	disrupted in renal carcinoma 2	muscle		F
DIS3	0.00128804	0.0971692	-0.338217	0.791018	DIS3 mitotic control homolog (S. cerevisiae)	muscle		F+M
DKFZP564C152	0.0037886	0.0283874	-0.343132	0.788328	DKFZP564C152 protein	muscle		F
DKFZP586I1420	0.00761347	0.0382916	0.344106	1.26936	hypothetical protein DKFZp586I1420	muscle		F
DLAT	8.65453e-05	0.00873646	-0.749037	0.595001	dihydrolipoamide S-acetyltransferase	muscle		F
DLD	0.000305262	0.0122064	-0.492448	0.710818	dihydrolipoamide dehydrogenase	muscle		F
DLEU1	0.00027892	0.0118575	-0.358594	0.779924	deleted in lymphocytic leukemia 1 (non-protein coding)	muscle		F
DLEU2	0.00340527	0.0271257	0.458761	1.37436	deleted in lymphocytic leukemia 2 (non-protein coding)	muscle		F
DLEU2L	0.00308481	0.0262284	0.64108	1.5595	deleted in lymphocytic leukemia 2-like///deleted in lymphocytic leukemia 2 (non-protein coding)	muscle		F
DLG1	0.000114264	0.0668384	0.636111	1.55413	CDNA clone IMAGE:4798592	muscle		F+M
DLG3	0.00541372	0.0458047	-0.287265	0.819454	discs, large homolog 3 (Drosophila)	nervous		F+M
DLGAP1	0.00214665	0.0287846	-0.633301	0.6447	discs, large (Drosophila) homolog-associated protein 1	nervous		F+M
DMD	0.000451407	0.0249628	0.66038	1.5805	dystrophin	muscle		M
DMTF1	0.00119683	0.0304895	0.419635	1.33759	cyclin D binding myb-like transcription factor 1	muscle		M
DNAH1	0.00103875	0.0944852	-0.281227	0.822891	dynein, axonemal, heavy chain 1	muscle		F+M
DNAJB11	0.00408087	0.047178	-0.315395	0.803631	DnaJ (Hsp40) homolog, subfamily B, member 11	muscle		F
DNAJB2	0.0128414	0.0492984	0.370949	1.2932	DnaJ (Hsp40) homolog, subfamily B, member 2	muscle		F
DNAJB4	0.00137207	0.0221578	-0.649588	0.637463	DnaJ (Hsp40) homolog, subfamily B, member 4	nervous		F+M
DNAJB6	0.00739774	0.0378668	-0.912119	0.531404	DnaJ (Hsp40) homolog, subfamily B, member 6	muscle		F
DNAJC14	0.00151868	0.0319481	-0.330804	0.795093	DnaJ (Hsp40) homolog, subfamily C, member 14	muscle		F
DNAJC16	0.00327954	0.0397796	0.411451	1.33002	DnaJ (Hsp40) homolog, subfamily C, member 16	muscle		M
DNAJC18	0.000206868	0.072828	-0.688916	0.62032	DnaJ (Hsp40) homolog, subfamily C, member 18	muscle		F+M
DNAJC19	0.00344687	0.0445286	-0.325702	0.79791	DnaJ (Hsp40) homolog, subfamily C, member 19	muscle		F
DNAJC21	2.37303e-05	0.0152259	-0.384053	0.766282	DnaJ (Hsp40) homolog, subfamily C, member 21	muscle		F
DNAJC4	0.00964657	0.0417569	-0.27171	0.828337	DnaJ (Hsp40) homolog, subfamily C, member 4	muscle		F
DNM1L	0.00210499	0.0216871	-0.575206	0.67119	dynamin 1-like	muscle	duplicate	F
DNM1L	0.00442386	0.0309516	-0.45376	0.730137	dynamin 1-like	nervous	duplicate	F+M
DOCK1	0.00527666	0.0450556	0.288672	1.22152	dedicator of cytokinesis 1	nervous		F+M
DPH2	0.000439184	0.0814557	-0.776993	0.583582	DPH2 homolog (S. cerevisiae)	muscle		F+M
DPT	0.00376353	0.043536	0.757512	1.69057	dermatopontin	muscle		M
DPYSL2	0.00503291	0.0486615	0.606396	1.52245	dihydropyrimidinase-like 2	muscle		M
DPYSL3	7.82477e-05	0.00558917	0.590194	1.50545	dihydropyrimidinase-like 3	nervous		F+M
DR1	0.00798409	0.0388493	-0.452011	0.731023	down-regulator of transcription 1, TBP-binding (negative cofactor 2)	muscle		F
DSTN	0.0044041	0.0294969	-0.406362	0.754524	destrin (actin depolymerizing factor)	muscle		F
DTNA	0.00272394	0.0246661	-0.366786	0.775508	dystrobrevin, alpha	muscle		F
DUSP13	0.0004916	0.012809	-0.291461	0.817074	dual specificity phosphatase 13	muscle		F
DUSP3	0.00555353	0.0320533	-0.746455	0.596066	dual specificity phosphatase 3	muscle		F
DUT	0.00558978	0.0498965	0.412666	1.33114	deoxyuridine triphosphatase	muscle		M
DVL3	0.000230129	0.0117647	-0.342139	0.788871	dishevelled, dsh homolog 3 (Drosophila)	muscle		F
DYNC1H1	0.00137905	0.0311116	0.484433	1.39904	dynein, cytoplasmic 1, heavy chain 1	muscle		M
DYNC1I1	0.00175875	0.0255177	-0.639804	0.6418	dynein, cytoplasmic 1, intermediate chain 1	nervous		F+M
DYNC1I2	0.000374883	0.0223677	0.353283	1.27746	dynein, cytoplasmic 1, intermediate chain 2	muscle		M
DYNC1LI2	0.00459683	0.0471601	0.444904	1.36122	dynein, cytoplasmic 1, light intermediate chain 2	muscle		M
E2F4	0.00478425	0.0428198	-0.55275	0.68172	E2F transcription factor 4, p107/p130-binding	nervous		F+M
EBF3	0.00113198	0.0298481	-0.313806	0.804516	early B-cell factor 3	muscle		F
ECH1	0.00204387	0.0277065	0.297531	1.22904	enoyl CoA hydratase 1, peroxisomal	nervous		F+M
ECHDC1	0.00169497	0.0343431	-0.809333	0.570645	enoyl CoA hydratase domain containing 1	muscle		F
ECSIT	0.000773675	0.0150221	-0.544974	0.685404	ECSIT homolog (Drosophila)	muscle	duplicate	F
ECSIT	0.00529039	0.0492603	-0.324057	0.79882	ECSIT homolog (Drosophila)	muscle	duplicate	M
EDF1	0.00367327	0.0280436	0.367086	1.28975	endothelial differentiation-related factor 1	muscle		F
EEA1	0.000267088	0.0331658	0.379087	1.30052	early endosome antigen 1	muscle		M
EEF1A1	0.00262774	0.0375249	0.534135	1.44807	eukaryotic translation elongation factor 1 alpha 1	muscle		M
EEF1A1P29	0.00158359	0.0320578	0.539824	1.4538	eukaryotic translation elongation factor 1 alpha 1 pseudogene 29///eukaryotic translation elongation factor 1 alpha 1 pseudogene 24///eukaryotic translation elongation factor 1 alpha 1 pseudogene 22///eukaryotic translation elongation factor 1 alpha 1 pse	muscle		M
EEF1E1	0.000238929	0.0113524	-0.392121	0.762008	eukaryotic translation elongation factor 1 epsilon 1	muscle	duplicate	F
EEF1E1	0.00511198	0.0490079	0.348715	1.27343	eukaryotic translation elongation factor 1 epsilon 1	muscle	duplicate	M
EEF1E1	0.000763859	0.086181	0.496057	1.41035	eukaryotic translation elongation factor 1 epsilon 1	muscle	duplicate	F+M
EFEMP1	0.00167765	0.025228	0.930865	1.90642	EGF-containing fibulin-like extracellular matrix protein 1	nervous		F+M
EFEMP2	0.00265306	0.0242416	-0.360194	0.77906	EGF-containing fibulin-like extracellular matrix protein 2	muscle		F
EFHA1	0.00448763	0.0467807	0.498625	1.41287	EF-hand domain family, member A1	muscle		M
EFHD1	0.000733792	0.0159388	0.55964	1.4739	EF-hand domain family, member D1	nervous		F+M
EGFR	0.00359051	0.0429591	0.378704	1.30017	epidermal growth factor receptor	muscle		M
EHBP1L1	0.00141099	0.0183232	0.382452	1.30356	EH domain binding protein 1-like 1	muscle		F
EIF3A	0.00340656	0.0400074	0.300981	1.23198	eukaryotic translation initiation factor 3, subunit A	muscle	duplicate	M
EIF3A	0.000173603	0.0673535	0.568856	1.48335	eukaryotic translation initiation factor 3, subunit A	muscle	duplicate	F+M
EIF3J	0.000894936	0.0157145	-0.299421	0.812578	eukaryotic translation initiation factor 3, subunit J	muscle		F
EIF4A1	0.00181249	0.0336841	0.531319	1.44525	eukaryotic translation initiation factor 4A1	muscle		M
EIF4E	0.000449335	0.00907298	-0.384346	0.766126	eukaryotic translation initiation factor 4E	muscle		F
EIF4E3	0.0027643	0.039052	-0.612167	0.654213	eukaryotic translation initiation factor 4E family member 3	muscle		F
EIF4EBP1	0.00100833	0.0163545	-0.426281	0.744178	eukaryotic translation initiation factor 4E binding protein 1	muscle		F
EIF4G3	0.000685752	0.0145001	-0.341787	0.789063	eukaryotic translation initiation factor 4 gamma, 3	muscle		F
EIF5	0.0114277	0.0462916	-0.421711	0.746539	eukaryotic translation initiation factor 5	muscle		F
EIF5A2	0.00120014	0.0964712	0.690044	1.61333	eukaryotic translation initiation factor 5A2	muscle		F+M
EIF5B	0.00145772	0.0317797	0.89283	1.85681	eukaryotic translation initiation factor 5B	muscle		M
ELAVL2	0.00519466	0.0437432	-0.447372	0.733378	ELAV (embryonic lethal, abnormal vision, Drosophila)-like 2 (Hu antigen B)	nervous		F+M
ELL2	0.000347985	0.0334886	0.85558	1.80949	elongation factor, RNA polymerase II, 2	muscle		M
ELP2	0.0013115	0.0975836	0.447111	1.36331	elongation protein 2 homolog (S. cerevisiae)	muscle		F+M
ELP3	0.00522772	0.0320378	-0.281534	0.822716	elongation protein 3 homolog (S. cerevisiae)	muscle		F
EMCN	0.00229805	0.0318579	-0.673923	0.6268	endomucin	muscle		F
EMP1	0.0027421	0.0389791	1.01347	2.01877	epithelial membrane protein 1	muscle		M
EMP2	0.00168842	0.0343914	-0.513955	0.7003	epithelial membrane protein 2	muscle		F
ENDOG	0.00651922	0.0358216	-0.34182	0.789045	endonuclease G	muscle		F
ENPP4	0.00799296	0.0387074	-0.363085	0.7775	ectonucleotide pyrophosphatase/phosphodiesterase 4 (putative)	muscle		F
EP400	0.00611078	0.0492351	-0.364814	0.776569	E1A binding protein p400	nervous		F+M
EPB41	0.00116066	0.0955191	-0.768762	0.586921	erythrocyte membrane protein band 4.1 (elliptocytosis 1, RH-linked)	muscle		F+M
EPB41L1	0.000211697	0.0113996	-0.321406	0.800289	erythrocyte membrane protein band 4.1-like 1	muscle		F
EPB41L4B	0.000369247	0.0784319	0.348372	1.27312	erythrocyte membrane protein band 4.1 like 4B	muscle		F+M
EPDR1	0.00231934	0.0383212	-0.327804	0.796748	ependymin related protein 1 (zebrafish)	muscle		F
EPHB1	0.000279559	0.0764693	-0.46657	0.723683	EPH receptor B1	muscle		F+M
EPHX1	0.0117634	0.046806	-0.44052	0.736869	epoxide hydrolase 1, microsomal (xenobiotic)	muscle		F
EPM2A	0.011197	0.0459559	-0.460792	0.726587	epilepsy, progressive myoclonus type 2A, Lafora disease (laforin)	muscle		F
ERAP1	0.00522936	0.0492994	0.74913	1.68078	endoplasmic reticulum aminopeptidase 1	muscle		M
ERBB2IP	0.00283942	0.0388991	0.498357	1.4126	erbb2 interacting protein	muscle		M
ERBB3	0.000747339	0.0159532	0.583372	1.49835	v-erb-b2 erythroblastic leukemia viral oncogene homolog 3 (avian)	nervous		F+M
ERG	0.00377741	0.0454438	-0.56051	0.678062	v-ets erythroblastosis virus E26 oncogene homolog (avian)	muscle		F
ESRRA	0.00144381	0.0184927	-0.365581	0.776156	estrogen-related receptor alpha	muscle	duplicate	F
ESRRA	0.00375143	0.0436185	-0.433511	0.740458	estrogen-related receptor alpha	muscle	duplicate	M
ESRRG	0.00024361	0.0746967	0.774133	1.71016	estrogen-related receptor gamma	muscle		F+M
ESYT2	0.000748622	0.0430115	0.46865	1.38381	extended synaptotagmin-like protein 2	muscle		M
ETF1	0.00431751	0.0456367	0.51397	1.42797	eukaryotic translation termination factor 1	muscle		M
ETNK1	0.00221455	0.0367842	0.387827	1.30842	ethanolamine kinase 1	muscle		M
ETS2	0.00187174	0.026637	-0.480896	0.716532	v-ets erythroblastosis virus E26 oncogene homolog 2 (avian)	nervous		F+M
EWSR1	0.00316563	0.040897	0.360716	1.28406	Ewing sarcoma breakpoint region 1	muscle		M
EXDL2	0.000262747	0.0756818	-0.354451	0.782167	exonuclease 3'-5' domain-like 2	muscle		F+M
EXOC1	0.00347798	0.0422821	0.368754	1.29124	exocyst complex component 1	muscle		M
EXOC3	0.0100405	0.0432302	0.400489	1.31995	exocyst complex component 3	muscle		F
EXOC6	0.00319052	0.0443418	-0.687918	0.620749	exocyst complex component 6	muscle		F
EXOSC1	0.000182957	0.0675367	0.757573	1.69064	exosome component 1	muscle		F+M
EXOSC10	0.00519527	0.0319846	0.276468	1.21123	exosome component 10	muscle	duplicate	F
EXOSC10	0.000122888	0.015479	0.596452	1.51199	exosome component 10	muscle	duplicate	M
EXOSC8	0.00183276	0.0337838	0.603825	1.51974	exosome component 8	muscle		M
EXPH5	0.0036322	0.0431166	0.670193	1.59129	exophilin 5	muscle		M
F8	0.000904313	0.0157423	-0.340541	0.789745	coagulation factor VIII, procoagulant component	muscle		F
FABP3	0.00150153	0.018659	-0.857363	0.55196	fatty acid binding protein 3, muscle and heart (mammary-derived growth inhibitor)	muscle		F
FADS1	0.00266711	0.0217723	0.536472	1.45042	fatty acid desaturase 1	nervous		F+M
FAHD2A	0.0113715	0.0462494	-0.286487	0.819896	fumarylacetoacetate hydrolase domain containing 2A	muscle		F
FAM101A	0.00218144	0.0373243	-0.398728	0.758527	family with sequence similarity 101, member A	muscle		F
FAM104B	0.00142836	0.0316023	-0.419482	0.747693	family with sequence similarity 104, member B	muscle		F
FAM109A	0.000384562	0.0794651	-0.820034	0.566428	family with sequence similarity 109, member A	muscle		F+M
FAM114A2	0.0010891	0.0301636	-0.294154	0.815551	family with sequence similarity 114, member A2	muscle		F
FAM118B	0.00029579	0.0180748	-0.329111	0.796027	family with sequence similarity 118, member B	muscle		F
FAM125B	7.99863e-05	0.0596312	-0.592659	0.663119	family with sequence similarity 125, member B	muscle		F+M
FAM162A	0.00164293	0.0337552	-0.480321	0.716818	family with sequence similarity 162, member A	muscle		F
FAM188A	0.00817234	0.0391986	-0.526203	0.69438	family with sequence similarity 188, member A	muscle		F
FAM3C	0.00560114	0.0498018	0.613524	1.52999	family with sequence similarity 3, member C	muscle		M
FAM45A	0.00142612	0.0317353	-0.3391	0.790535	family with sequence similarity 45, member A///family with sequence similarity 45, member A pseudogene	muscle		F
FAM49A	0.000270038	0.0214826	-0.31973	0.80122	family with sequence similarity 49, member A	muscle	duplicate	M
FAM49A	0.000205045	0.00818925	-0.515719	0.699444	family with sequence similarity 49, member A	nervous	duplicate	F+M
FAM53C	0.00140601	0.03095	0.347574	1.27242	family with sequence similarity 53, member C	muscle		M
FAM55C	0.00949042	0.041526	-0.563707	0.676561	family with sequence similarity 55, member C	muscle		F
FAM59A	0.000533549	0.0244387	0.507689	1.42177	family with sequence similarity 59, member A	muscle		M
FAM65B	0.00164159	0.032893	0.636115	1.55414	family with sequence similarity 65, member B	muscle		M
FAM69A	0.00509535	0.0312349	-0.325538	0.798001	family with sequence similarity 69, member A	muscle		F
FAM78A	0.00241071	0.0393245	-0.269903	0.829375	family with sequence similarity 78, member A	muscle		F
FAM82B	0.00102014	0.0162846	-0.504877	0.70472	family with sequence similarity 82, member B	muscle		F
FAM92A1	0.000289405	0.0179699	-0.457293	0.728352	family with sequence similarity 92, member A1	muscle		F
FAM96A	0.00114202	0.0295065	-0.548271	0.683839	family with sequence similarity 96, member A	muscle		F
FANCE	0.000153794	0.0704515	0.955853	1.93973	Fanconi anemia, complementation group E	muscle		F+M
FASTKD1	0.000577356	0.0140466	-0.455787	0.729112	FAST kinase domains 1	muscle		F
FAT1	0.00507338	0.0315225	-0.264379	0.832557	FAT tumor suppressor homolog 1 (Drosophila)	muscle		F
FBP2	0.00414966	0.0450168	-0.428267	0.743154	fructose-1,6-bisphosphatase 2	muscle		M
FBXO3	0.00325651	0.0267859	-0.423472	0.745628	F-box protein 3	muscle		F
FBXW12	0.00833335	0.0395947	0.547832	1.46189	F-box and WD repeat domain containing 12	muscle		F
FCER1A	0.000262015	0.0216024	-0.981709	0.50638	Fc fragment of IgE, high affinity I, receptor for; alpha polypeptide	muscle		M
FDFT1	0.00310566	0.0262399	-0.293027	0.816188	farnesyl-diphosphate farnesyltransferase 1	muscle	duplicate	F
FDFT1	0.000690023	0.0840887	0.416703	1.33487	Squalene synthase=farnesyl diphosphate:farnesyl diphosphate farnesyltransferase [human, liver, mRNA, 1673 nt]	muscle	duplicate	F+M
FDX1	4.10694e-05	0.0066346	-0.691038	0.619408	ferredoxin 1	muscle		F
FERMT2	0.000461154	0.0127564	-0.717435	0.608178	fermitin family member 2	muscle	duplicate	F
FERMT2	0.00073896	0.0158655	0.522269	1.43621	fermitin family member 2	nervous	duplicate	F+M
FEZ2	0.000991576	0.01648	0.391009	1.31131	fasciculation and elongation protein zeta 2 (zygin II)	muscle		F
FGF1	0.00132227	0.0304362	-0.372281	0.77256	fibroblast growth factor 1 (acidic)	muscle	duplicate	M
FGF1	6.42146e-05	0.00542075	0.84278	1.7935	fibroblast growth factor 1 (acidic)	nervous	duplicate	F+M
FGF12	6.25831e-05	0.00540589	-0.846144	0.556269	fibroblast growth factor 12	nervous		F+M
FGF7	0.000709471	0.0156857	-0.382955	0.766865	fibroblast growth factor 7 (keratinocyte growth factor)	nervous		F+M
FGFR2	0.000220105	0.00834225	0.476499	1.39136	fibroblast growth factor receptor 2	nervous		F+M
FGFR3	0.000384415	0.0114227	0.632415	1.55016	fibroblast growth factor receptor 3	nervous		F+M
FGGY	0.00121643	0.017058	0.518931	1.43289	FGGY carbohydrate kinase domain containing	muscle		F
FHAD1	0.000512342	0.0818487	0.350757	1.27523	forkhead-associated (FHA) phosphopeptide binding domain 1	muscle		F+M
FIG4	0.00557613	0.0498728	0.346123	1.27114	FIG4 homolog, SAC1 lipid phosphatase domain containing (S. cerevisiae)	muscle		M
FIGF	0.000326735	0.0117819	0.348842	1.27354	c-fos induced growth factor (vascular endothelial growth factor D)	muscle		F
FKBP1A	0.00179544	0.0186363	-0.368218	0.774739	FK506 binding protein 1A, 12kDa	muscle	duplicate	F
FKBP1A	1.62748e-05	0.00318157	-1.08851	0.470247	FK506 binding protein 1A, 12kDa	nervous	duplicate	F+M
FLII	0.00354604	0.0275939	-0.482458	0.715757	flightless I homolog (Drosophila)	muscle		F
FLJ25006	0.00112838	0.0955516	0.7511	1.68308	uncharacterized serine/threonine-protein kinase SgK494	muscle		F+M
FLJ30064	0.000534464	0.0380997	-0.263972	0.832792	hypothetical protein LOC644975	muscle		M
FLJ39061	0.00126762	0.0969752	-0.287092	0.819553	hypothetical protein FLJ39061	muscle		F+M
FLJ43663	0.000512786	0.0815768	0.920829	1.8932	hypothetical LOC378805	muscle		F+M
FLRT3	0.000990487	0.0488822	0.402671	1.32195	fibronectin leucine rich transmembrane protein 3	muscle		M
FLT1	0.000493934	0.0216081	-0.593444	0.662759	fms-related tyrosine kinase 1 (vascular endothelial growth factor/vascular permeability factor receptor)	muscle		F
FMN1	0.00123021	0.0966408	-0.45862	0.727682	formin 1	muscle		F+M
FMO3	0.0040766	0.0445439	0.781109	1.71845	flavin containing monooxygenase 3	muscle		M
FNBP1	0.00280483	0.0319571	0.32947	1.25655	formin binding protein 1	nervous		F+M
FNBP4	0.00192416	0.0346241	0.578656	1.49346	formin binding protein 4	muscle		M
FNTA	0.00533916	0.0324256	-0.397677	0.75908	farnesyltransferase, CAAX box, alpha	muscle	duplicate	F
FNTA	0.00437671	0.040743	0.316833	1.24559	farnesyltransferase, CAAX box, alpha	nervous	duplicate	F+M
FOXD1	0.00112797	0.0957299	-0.322084	0.799914	forkhead box D1	muscle		F+M
FOXJ2	0.00130428	0.0301755	0.284289	1.21781	forkhead box J2	muscle		M
FOXN3	0.00469412	0.0305773	-0.394759	0.760616	forkhead box N3	muscle		F
FOXO1	0.00161167	0.0190321	0.5673	1.48175	forkhead box O1	muscle		F
FOXO3	0.00156724	0.0187821	0.543944	1.45795	forkhead box O3	muscle	duplicate	F
FOXO3	0.00625306	0.0408319	0.598831	1.51449	forkhead box O3	muscle	duplicate	M
FOXO4	0.000501942	0.0242139	0.626654	1.54398	forkhead box O4	muscle		M
FOXRED1	0.00187343	0.0355281	-0.303094	0.810512	FAD-dependent oxidoreductase domain containing 1	muscle		F
FPGT	0.00595115	0.0344336	-0.455833	0.729089	fucose-1-phosphate guanylyltransferase	muscle		F
FRG1	0.00483781	0.0474838	0.460234	1.37576	FSHD region gene 1	muscle		M
FRG1B	0.000759459	0.0859396	-0.336369	0.792032	Hypothetical protein LOC283788, mRNA (cDNA clone MGC:23868 IMAGE:4297267)	muscle		F+M
FRMD3	0.0040575	0.0469184	-0.41155	0.751815	FERM domain containing 3	muscle		F
FRMPD4	8.63182e-05	0.00562479	-0.889778	0.539697	FERM and PDZ domain containing 4	nervous		F+M
FSIP1	0.000793631	0.0874637	0.630387	1.54798	fibrous sheath interacting protein 1	muscle		F+M
FUBP3	0.000504981	0.0241041	0.707147	1.63257	far upstream element (FUSE) binding protein 3	muscle		M
FUNDC2	0.00099186	0.0289272	-0.322884	0.79947	FUN14 domain containing 2	muscle		F
FYN	0.00392587	0.0381339	0.48688	1.40141	FYN oncogene related to SRC, FGR, YES	nervous		F+M
FYTTD1	0.0065577	0.0495929	-0.497334	0.708415	forty-two-three domain containing 1	muscle		F
G3BP2	0.00034666	0.0218328	0.579365	1.49419	GTPase activating protein (SH3 domain) binding protein 2	muscle		M
GAB1	0.000237308	0.0758218	-0.300259	0.812107	GRB2-associated binding protein 1	muscle		F+M
GAB2	0.00372823	0.0368293	0.604383	1.52033	GRB2-associated binding protein 2	nervous		F+M
GABRB3	3.19459e-07	0.00118657	-1.10424	0.465146	gamma-aminobutyric acid (GABA) A receptor, beta 3	nervous		F+M
GALC	0.00242249	0.0233499	-0.388497	0.763925	galactosylceramidase	muscle		F
GART	0.000877815	0.0909422	-0.42315	0.745794	phosphoribosylglycinamide formyltransferase, phosphoribosylglycinamide synthetase, phosphoribosylaminoimidazole synthetase	muscle		F+M
GATA2	0.0033313	0.034757	-0.338361	0.790939	GATA binding protein 2	nervous		F+M
GATM	0.0028367	0.0249596	-0.748458	0.595239	glycine amidinotransferase (L-arginine:glycine amidinotransferase)	muscle	duplicate	F
GATM	0.00449501	0.0398862	0.508109	1.42218	glycine amidinotransferase (L-arginine:glycine amidinotransferase)	nervous	duplicate	F+M
GBA2	0.000982061	0.0293075	-0.519615	0.697558	glucosidase, beta (bile acid) 2	muscle		F
GBAS	0.00110196	0.019678	0.310138	1.23983	glioblastoma amplified sequence	nervous		F+M
GBP2	0.000212027	0.0726266	1.35571	2.55923	guanylate binding protein 2, interferon-inducible	muscle		F+M
GCC2	0.00244267	0.0372946	0.38227	1.30339	GRIP and coiled-coil domain containing 2	muscle		M
GCH1	0.000588371	0.0142289	0.308819	1.23869	GTP cyclohydrolase 1	muscle		F
GCOM1	0.0069979	0.0368644	-0.266758	0.831185	GRINL1A complex locus///glutamate receptor, ionotropic, N-methyl D-aspartate-like 1A	muscle		F
GDAP1	0.00133788	0.0985817	0.839782	1.78978	ganglioside-induced differentiation-associated protein 1	muscle		F+M
GDE1	0.00633361	0.0353793	-0.867202	0.548209	glycerophosphodiester phosphodiesterase 1	muscle		F
GDI2	0.00392553	0.0466427	-0.529669	0.692714	GDP dissociation inhibitor 2	muscle	duplicate	F
GDI2	0.000101316	0.0148202	0.274361	1.20946	GDP dissociation inhibitor 2	muscle	duplicate	M
GDI2	0.00375517	0.036997	-0.414695	0.750178	GDP dissociation inhibitor 2	nervous	duplicate	F+M
GFPT2	0.0001808	0.0108983	-0.301152	0.811604	glutamine-fructose-6-phosphate transaminase 2	muscle		F
GGNBP2	0.000349179	0.0216902	0.403031	1.32228	gametogenetin binding protein 2	muscle		M
GHITM	0.000376238	0.0123536	-0.481998	0.715985	growth hormone inducible transmembrane protein	muscle		F
GHR	0.000834648	0.0286727	0.354353	1.27841	growth hormone receptor	muscle		M
GIPC1	0.000250676	0.00895279	0.413961	1.33234	GIPC PDZ domain containing family, member 1	nervous		F+M
GIT2	0.00111288	0.0959485	0.351174	1.2756	G protein-coupled receptor kinase interacting ArfGAP 2	muscle		F+M
GJA1	0.00318095	0.0341475	0.605087	1.52107	gap junction protein, alpha 1, 43kDa	nervous		F+M
GLG1	0.000945585	0.0146877	0.322121	1.25017	golgi glycoprotein 1	muscle	duplicate	F
GLG1	0.00401693	0.0435583	0.456108	1.37184	golgi glycoprotein 1	muscle	duplicate	M
GLMN	0.000395749	0.0115743	-0.459603	0.727186	glomulin, FKBP associated protein	nervous		F+M
GLRX2	0.000598989	0.0143142	-0.338824	0.790685	glutaredoxin 2	muscle		F
GLRX3	0.00124821	0.0173676	-0.382604	0.767052	glutaredoxin 3	muscle		F
GLUD1	0.000230407	0.0116317	-0.479267	0.717342	glutamate dehydrogenase 1	muscle		F
GNA12	0.0022389	0.0374747	-0.309807	0.80675	guanine nucleotide binding protein (G protein) alpha 12	muscle		F
GNAQ	0.000359938	0.0108693	-0.754566	0.592725	guanine nucleotide binding protein (G protein), q polypeptide	nervous		F+M
GNB5	0.000208714	0.00824712	-0.677141	0.625403	guanine nucleotide binding protein (G protein), beta 5	nervous		F+M
GNE	0.00520238	0.0448336	0.480665	1.39539	glucosamine (UDP-N-acetyl)-2-epimerase/N-acetylmannosamine kinase	nervous		F+M
GNG12	0.00144733	0.0228758	0.66052	1.58065	guanine nucleotide binding protein (G protein), gamma 12	nervous		F+M
GNG5	7.04632e-05	0.00862353	-0.411587	0.751796	guanine nucleotide binding protein (G protein), gamma 5	muscle		F
GNL2	0.00279352	0.0389769	0.50222	1.41639	guanine nucleotide binding protein-like 2 (nucleolar)	muscle		M
GNPDA1	0.0035755	0.0428927	0.68032	1.6025	glucosamine-6-phosphate deaminase 1	muscle	duplicate	M
GNPDA1	0.000387677	0.0792474	0.341219	1.26683	glucosamine-6-phosphate deaminase 1	muscle	duplicate	F+M
GNPTAB	0.00385148	0.028646	-0.347063	0.786183	N-acetylglucosamine-1-phosphate transferase, alpha and beta subunits	muscle		F
GOLGA3	0.00731321	0.0377692	0.288889	1.2217	golgin A3	muscle		F
GOLGA4	0.00541522	0.0494081	0.79908	1.73999	golgin A4	muscle		M
GOT1	0.00167092	0.0190629	-0.770905	0.58605	glutamic-oxaloacetic transaminase 1, soluble (aspartate aminotransferase 1)	muscle		F
GOT2	0.000200738	0.0115816	-0.413746	0.750672	glutamic-oxaloacetic transaminase 2, mitochondrial (aspartate aminotransferase 2)	muscle		F
GP6	0.000708022	0.0843887	0.65155	1.57086	glycoprotein VI (platelet)	muscle		F+M
GPATCH8	0.0037146	0.0434129	0.439131	1.35579	G patch domain containing 8	muscle		M
GPC4	0.000324324	0.0785429	-0.678107	0.624985	glypican 4	muscle		F+M
GPD1	0.00916113	0.0412471	-0.289192	0.818361	glycerol-3-phosphate dehydrogenase 1 (soluble)	muscle		F
GPR108	0.000156548	0.0172191	-0.339288	0.790431	G protein-coupled receptor 108	muscle		F
GPR116	0.00820929	0.039236	-0.333135	0.79381	G protein-coupled receptor 116	muscle		F
GPR137B	0.00474095	0.0426377	0.549746	1.46383	G protein-coupled receptor 137B	nervous		F+M
GPR177	0.0003441	0.0792919	0.847939	1.79993	G protein-coupled receptor 177	muscle		F+M
GPR75	0.000230894	0.0750336	-0.493197	0.710449	G protein-coupled receptor 75	muscle		F+M
GPRC5B	0.000304485	0.0100084	0.544799	1.45882	G protein-coupled receptor, family C, group 5, member B	nervous		F+M
GPX3	0.00139511	0.0993332	1.3297	2.51351	glutathione peroxidase 3 (plasma)	muscle		F+M
GRHPR	0.00065937	0.0142227	-0.317905	0.802234	glyoxylate reductase/hydroxypyruvate reductase	muscle		F
GRIK1	0.00622953	0.049547	-0.407997	0.753669	glutamate receptor, ionotropic, kainate 1	nervous		F+M
GRIK5	0.00173988	0.0255433	-0.318558	0.801871	glutamate receptor, ionotropic, kainate 5	nervous		F+M
GRIN2A	4.57693e-06	0.00242859	-0.900695	0.535629	glutamate receptor, ionotropic, N-methyl D-aspartate 2A	nervous		F+M
GRLF1	0.00623411	0.0352131	-0.392204	0.761965	glucocorticoid receptor DNA binding factor 1	muscle	duplicate	F
GRLF1	0.00300642	0.0331358	-0.457832	0.728079	glucocorticoid receptor DNA binding factor 1	nervous	duplicate	F+M
GRM7	0.00104902	0.0942917	-0.296619	0.814158	glutamate receptor, metabotropic 7	muscle		F+M
GRSF1	0.000482127	0.0128101	-0.429196	0.742675	G-rich RNA sequence binding factor 1	muscle		F
GSDMB	0.00112083	0.0959806	0.360915	1.28424	CDNA FLJ59250 complete cds, weakly similar to Gasdermin	muscle		F+M
GSG1L	0.00062416	0.085059	-0.635332	0.643793	GSG1-like	muscle		F+M
GSN	0.00113887	0.0307399	0.47473	1.38966	gelsolin	muscle	duplicate	M
GSN	0.000853787	0.0173291	0.476907	1.39176	gelsolin	nervous	duplicate	F+M
GSTM4	0.00587511	0.0342388	-0.481013	0.716474	glutathione S-transferase mu 4	muscle		F
GSTT1	0.00174998	0.0343723	0.331236	1.25809	glutathione S-transferase theta 1	muscle		F
GTDC1	0.00124983	0.0172274	-0.304202	0.80989	glycosyltransferase-like domain containing 1	muscle		F
GTF2H5	0.00146623	0.0316607	0.409391	1.32813	general transcription factor IIH, polypeptide 5	muscle	duplicate	M
GTF2H5	0.0018842	0.0267119	0.279542	1.21381	general transcription factor IIH, polypeptide 5	nervous	duplicate	F+M
GTF2IRD2	0.00353137	0.0448675	-0.287821	0.819139	GTF2I repeat domain containing 2	muscle		F
GTF3C6	0.000257195	0.0183358	-0.286337	0.819981	general transcription factor IIIC, polypeptide 6, alpha 35kDa	muscle		F
GTPBP10	0.00356595	0.0445713	-0.386123	0.765183	GTP-binding protein 10 (putative)	muscle		F
GUF1	0.00310435	0.0262838	-0.411852	0.751658	GUF1 GTPase homolog (S. cerevisiae)	muscle		F
GULP1	0.00213491	0.0217731	-0.590414	0.664152	GULP, engulfment adaptor PTB domain containing 1	muscle		F
GYG1	0.000761127	0.014922	-0.350143	0.784507	glycogenin 1	muscle	duplicate	F
GYG1	0.00283636	0.0321193	0.304112	1.23466	glycogenin 1	nervous	duplicate	F+M
H19	0.00103666	0.0945209	1.14286	2.20819	H19, imprinted maternally expressed transcript (non-protein coding)	muscle		F+M
H1F0	0.00152575	0.0234179	0.335285	1.26163	H1 histone family, member 0	nervous		F+M
H2AFV	7.40841e-05	0.00854856	0.331976	1.25874	H2A histone family, member V	muscle	duplicate	F
H2AFV	0.00273043	0.0381111	0.515566	1.42956	H2A histone family, member V	muscle	duplicate	M
H2AFV	0.000426973	0.0807667	-0.649064	0.637694	H2A histone family, member V	muscle	duplicate	F+M
H3F3A	0.000578677	0.0836582	0.508599	1.42267	H3 histone, family 3A /// H3 histone, family 3B (H3.3B) /// H3 histone, family 3A pseudogene	muscle		F+M
H6PD	3.69709e-05	0.012896	1.23342	2.35123	hexose-6-phosphate dehydrogenase (glucose 1-dehydrogenase)	muscle		M
HADH	0.00114101	0.0306231	0.485913	1.40047	hydroxyacyl-CoA dehydrogenase	muscle		M
HADHB	0.00248266	0.0306358	0.393926	1.31396	hydroxyacyl-CoA dehydrogenase/3-ketoacyl-CoA thiolase/enoyl-CoA hydratase (trifunctional protein), beta subunit	nervous		F+M
HAS3	0.000452259	0.0822752	-0.569728	0.673744	hyaluronan synthase 3	muscle		F+M
HAUS2	0.0104255	0.0440428	0.379406	1.30081	HAUS augmin-like complex, subunit 2	muscle		F
HBA2	5.73488e-05	0.00546183	1.20928	2.31222	hemoglobin, alpha 2///hemoglobin, alpha 1	nervous		F+M
HBB	3.57696e-05	0.00471418	1.22971	2.3452	hemoglobin, beta	nervous		F+M
HBBP1	0.0119679	0.0473865	-0.30616	0.808792	hemoglobin, beta pseudogene 1	muscle		F
HCCS	7.22424e-05	0.00792353	-0.387229	0.764597	holocytochrome c synthase	muscle	duplicate	F
HCCS	1.37724e-05	0.00284195	-0.529016	0.693027	holocytochrome c synthase	nervous	duplicate	F+M
hCG_1990547	0.000717514	0.0836837	-0.316671	0.80292	family with sequence similarity 86, member A pseudogene	muscle		F+M
hCG_2019139	0.00130477	0.0976559	1.30217	2.466	hCG2019139	muscle		F+M
HCG2P7	0.0011541	0.0956	0.596687	1.51224	HLA complex group 2 pseudogene 7	muscle		F+M
HDAC4	0.0078643	0.0387331	0.542554	1.45655	histone deacetylase 4	muscle		F
HDDC2	0.00161509	0.0189066	-0.369108	0.774261	HD domain containing 2	muscle	duplicate	F
HDDC2	0.0015304	0.0233926	0.315685	1.2446	HD domain containing 2	nervous	duplicate	F+M
HEATR1	0.000739181	0.0149265	-0.265987	0.831629	HEAT repeat containing 1	muscle		F
HEBP2	0.00115055	0.0200634	0.705517	1.63073	heme binding protein 2	nervous		F+M
HEMK1	5.613e-05	0.0576795	-0.345186	0.787206	HemK methyltransferase family member 1	muscle		F+M
HERPUD2	0.000227239	0.0301635	0.599059	1.51473	HERPUD family member 2	muscle		M
HIBADH	0.00364543	0.0449806	-0.407498	0.75393	3-hydroxyisobutyrate dehydrogenase	muscle		F
HIGD1A	0.00470455	0.0307636	-0.331096	0.794933	HIG1 hypoxia inducible domain family, member 1A	muscle		F
HIP1R	0.00252241	0.0309208	0.322022	1.25008	huntingtin interacting protein 1 related	nervous		F+M
HIST1H2AC	0.00933191	0.0413703	0.274153	1.20928	histone cluster 1, H2ac	muscle		F
HIST1H4A	0.000971709	0.0940096	0.270805	1.20648	histone cluster 1, H4a /// histone cluster 1, H4b /// histone cluster 1, H4c /// histone cluster 1, H4d /// histone cluster 1, H4e /// histone cluster 1, H4f /// histone cluster 1, H4h /// histone cluster 1, H4i /// histone cluster 1, H4j /// histone clus	muscle		F+M
HIST2H4B	0.0113288	0.0461687	0.279481	1.21376	histone cluster 2, H4b///histone cluster 4, H4///histone cluster 2, H4a///histone cluster 1, H4l///histone cluster 1, H4e///histone cluster 1, H4b///histone cluster 1, H4h///histone cluster 1, H4c///histone cluster 1, H4j///histone cluster 1, H4k///histon	muscle		F
HIVEP1	0.0109673	0.0453824	-0.296284	0.814347	human immunodeficiency virus type I enhancer binding protein 1	muscle		F
HIVEP2	0.00683923	0.0367304	0.339318	1.26516	human immunodeficiency virus type I enhancer binding protein 2	muscle		F
HLA-DPA1	0.00543199	0.0458548	0.661616	1.58185	major histocompatibility complex, class II, DP alpha 1	nervous		F+M
HLA-G	0.00956494	0.0416715	-0.378613	0.769177	major histocompatibility complex, class I, G	muscle		F
HLF	0.000699347	0.0159362	-0.464554	0.724695	hepatic leukemia factor	nervous		F+M
HMG20A	0.00304395	0.040009	0.42993	1.34717	high-mobility group 20A	muscle		M
HMGB1	0.0012421	0.0463841	0.617826	1.53456	high-mobility group box 1	muscle		M
HMGN2	0.000235526	0.0114603	0.314478	1.24356	high-mobility group nucleosomal binding domain 2	muscle	duplicate	F
HMGN2	0.000308729	0.0208949	0.506019	1.42013	high-mobility group nucleosomal binding domain 2	muscle	duplicate	M
HNRNPA1	0.00286837	0.0250201	0.337688	1.26373	heterogeneous nuclear ribonucleoprotein A1	muscle	duplicate	F
HNRNPA1	0.00358196	0.0401246	0.415122	1.33341	heterogeneous nuclear ribonucleoprotein A1	muscle	duplicate	M
HNRNPA3	0.000837893	0.0154519	0.302907	1.23363	heterogeneous nuclear ribonucleoprotein A3///heterogeneous nuclear ribonucleoprotein A3 pseudogene 1	muscle		F
HNRNPD	0.0057557	0.0456828	0.789462	1.72843	heterogeneous nuclear ribonucleoprotein D (AU-rich element RNA binding protein 1, 37kDa)	muscle		M
HNRNPH2	0.000963594	0.0295237	0.577956	1.49273	heterogeneous nuclear ribonucleoprotein H2 (H')	muscle		M
HNRNPH3	0.00169326	0.0252582	0.36088	1.28421	heterogeneous nuclear ribonucleoprotein H3 (2H9)	nervous		F+M
HNRNPK	7.43721e-05	0.0191006	0.576019	1.49073	heterogeneous nuclear ribonucleoprotein K	muscle		M
HNRNPM	0.00400322	0.028666	0.320108	1.24842	heterogeneous nuclear ribonucleoprotein M	muscle		F
HNRNPR	0.00139146	0.0310822	0.337038	1.26316	heterogeneous nuclear ribonucleoprotein R	muscle		M
HNRNPU	0.000829997	0.0289515	0.392892	1.31302	heterogeneous nuclear ribonucleoprotein U (scaffold attachment factor A)	muscle		M
HOMER3	0.000756112	0.014896	-0.491137	0.711464	homer homolog 3 (Drosophila)	muscle		F
HOXA3	0.000547448	0.0224205	0.457435	1.3731	homeobox A3	muscle		F
HPRT1	0.00465745	0.0472475	0.525833	1.43977	hypoxanthine phosphoribosyltransferase 1	muscle		M
HRSP12	0.00618117	0.0494802	0.381071	1.30231	heat-responsive protein 12	nervous		F+M
HSD3B7	0.000496375	0.0817007	-0.476106	0.718916	hydroxy-delta-5-steroid dehydrogenase, 3 beta- and steroid delta-isomerase 7	muscle		F+M
HSF1	0.000984626	0.015946	-0.423844	0.745436	heat shock transcription factor 1	muscle		F
HSF2	0.00185911	0.0337212	0.589928	1.50517	heat shock transcription factor 2	muscle		M
HSP90AB1	0.00104523	0.0196077	-0.809161	0.570714	heat shock protein 90kDa alpha (cytosolic), class B member 1	nervous		F+M
HSP90B1	0.00623489	0.0351684	-0.502975	0.70565	heat shock protein 90kDa beta (Grp94), member 1	muscle		F
HSPA13	0.00459815	0.0418603	-0.519542	0.697593	heat shock protein 70kDa family, member 13	nervous		F+M
HSPA1B	0.00775314	0.0386221	0.397068	1.31683	heat shock 70kDa protein 1B///heat shock 70kDa protein 1A	muscle		F
HSPA2	0.00477337	0.039907	0.791771	1.7312	heat shock 70kDa protein 2	nervous		F+M
HSPA8	0.00437764	0.0281527	-0.331546	0.794684	heat shock 70kDa protein 8	muscle		F
HSPA9	0.0037131	0.0282409	-0.518325	0.698182	heat shock 70kDa protein 9 (mortalin)	muscle		F
HSPB6	0.00396843	0.028671	-0.791627	0.577692	heat shock protein, alpha-crystallin-related, B6	muscle		F
HSPE1	0.00284388	0.0249142	-0.400195	0.757756	heat shock 10kDa protein 1 (chaperonin 10)	muscle		F
HTATSF1	9.53839e-05	0.0149147	0.661602	1.58184	HIV-1 Tat specific factor 1	muscle		M
HTR2A	0.0084752	0.049011	-0.711074	0.610865	5-hydroxytryptamine (serotonin) receptor 2A	nervous		F+M
HTRA1	0.00432636	0.0399099	0.403204	1.32244	HtrA serine peptidase 1	nervous		F+M
HTRA2	0.00326887	0.026833	-0.288711	0.818633	HtrA serine peptidase 2	muscle		F
HYDIN2	5.74656e-05	0.057498	-0.59973	0.659877	hydrocephalus inducing homolog 2 (mouse)	muscle		F+M
IAH1	0.00178974	0.0346231	-0.29633	0.814321	isoamyl acetate-hydrolyzing esterase 1 homolog (S. cerevisiae)	muscle		F
ICAM2	0.00100513	0.0164347	-0.339396	0.790372	intercellular adhesion molecule 2	muscle		F
ID4	0.00405848	0.0391545	0.785005	1.7231	inhibitor of DNA binding 4, dominant negative helix-loop-helix protein	nervous		F+M
IDH2	0.00186027	0.0202714	-0.276724	0.825463	isocitrate dehydrogenase 2 (NADP+), mitochondrial	muscle		F
IDH3A	0.00388861	0.0287633	-0.493312	0.710392	isocitrate dehydrogenase 3 (NAD+) alpha	muscle		F
IDH3G	0.00206773	0.0218038	-0.274462	0.826759	isocitrate dehydrogenase 3 (NAD+) gamma	muscle		F
IFI27L2	0.000448703	0.0213258	-0.458056	0.727967	interferon, alpha-inducible protein 27-like 2	muscle		F
IFRD2	0.000681751	0.0849874	-0.338012	0.791131	interferon-related developmental regulator 2	muscle		F+M
IFT81	0.00306221	0.0261463	-0.433423	0.740503	intraflagellar transport 81 homolog (Chlamydomonas)	muscle		F
IGHG1	0.00316126	0.0263786	-0.282973	0.821895	immunoglobulin heavy constant gamma 1 (G1m marker)	muscle		F
IGL@	0.000602045	0.0841566	-0.314642	0.804051	immunoglobulin lambda locus	muscle		F+M
IGLV1-44	0.000444839	0.0817073	-0.648358	0.638006	immunoglobulin lambda variable 1-44	muscle		F+M
IKBKB	0.0028149	0.0248761	-0.267532	0.83074	inhibitor of kappa light polypeptide gene enhancer in B-cells, kinase beta	muscle		F
IL1R2	0.000593466	0.0832635	-0.586327	0.666037	interleukin 1 receptor, type II	muscle		F+M
IL6ST	0.010181	0.0435104	-0.730061	0.602878	interleukin 6 signal transducer (gp130, oncostatin M receptor)	muscle	duplicate	F
IL6ST	0.000825661	0.0292503	0.497671	1.41193	interleukin 6 signal transducer (gp130, oncostatin M receptor)	muscle	duplicate	M
ILF2	0.000878073	0.0279091	0.317411	1.24609	interleukin enhancer binding factor 2, 45kDa	muscle		M
ILF3	0.00394258	0.0382349	-0.281735	0.822601	interleukin enhancer binding factor 3, 90kDa	nervous		F+M
IMP3	3.25183e-05	0.0134052	0.536973	1.45092	IMP3, U3 small nucleolar ribonucleoprotein, homolog (yeast)	muscle		M
IMPACT	0.000342478	0.0221857	0.50486	1.41899	Impact homolog (mouse)	muscle		M
IMPDH2	0.00285854	0.0249884	0.318017	1.24662	IMP (inosine 5'-monophosphate) dehydrogenase 2	muscle		F
INA	0.00090368	0.0918695	-0.444618	0.734779	internexin neuronal intermediate filament protein, alpha	muscle		F+M
ING5	0.00117726	0.0962607	-0.436117	0.739121	inhibitor of growth family, member 5	muscle		F+M
INPP4A	9.20729e-05	0.0056998	-0.683297	0.622741	inositol polyphosphate-4-phosphatase, type I, 107kDa	nervous		F+M
INSIG1	0.000912874	0.0157555	-0.308238	0.807628	insulin induced gene 1	muscle		F
INSIG2	0.00443073	0.0411428	-0.321517	0.800228	insulin induced gene 2	nervous		F+M
IPO11	0.00277575	0.0422368	-0.533675	0.690793	importin 11	muscle		F
IPP	0.000860848	0.0154519	0.431676	1.3488	intracisternal A particle-promoted polypeptide	muscle		F
IQCG	0.00139557	0.0991803	0.537996	1.45195	IQ motif containing G	muscle		F+M
IQCK	0.0040179	0.0286189	-0.422145	0.746314	IQ motif containing K	muscle		F
IQGAP1	0.000665672	0.0154532	0.535749	1.44969	IQ motif containing GTPase activating protein 1	nervous		F+M
IQSEC1	0.00559147	0.0334053	-0.297701	0.813548	IQ motif and Sec7 domain 1	muscle	duplicate	F
IQSEC1	0.00240343	0.0302614	-0.501956	0.706149	IQ motif and Sec7 domain 1	nervous	duplicate	F+M
ISCA1	0.0045338	0.0277642	-0.336101	0.792179	iron-sulfur cluster assembly 1 homolog (S. cerevisiae)	muscle		F
ISG20L2	0.00019697	0.00795225	-0.485131	0.714432	interferon stimulated exonuclease gene 20kDa-like 2	nervous		F+M
ISOC1	0.00208426	0.0216948	-0.480641	0.716659	isochorismatase domain containing 1	muscle		F
ITGA6	0.00525648	0.0449867	0.426358	1.34384	integrin, alpha 6	nervous		F+M
ITGB1	3.72691e-05	0.00477342	0.512339	1.42636	integrin, beta 1 (fibronectin receptor, beta polypeptide, antigen CD29 includes MDF2, MSK12)	nervous		F+M
ITGB1BP2	0.00838024	0.0396775	-0.336932	0.791723	integrin beta 1 binding protein (melusin) 2	muscle		F
ITGB6	0.00148576	0.0185773	-1.01905	0.49344	integrin, beta 6	muscle		F
ITM2A	0.00378576	0.0371016	0.476697	1.39155	integral membrane protein 2A	nervous		F+M
ITPKA	5.21197e-05	0.00509445	-0.850905	0.554437	inositol 1,4,5-trisphosphate 3-kinase A	nervous		F+M
ITPKB	0.000100657	0.00603019	0.739727	1.66986	inositol 1,4,5-trisphosphate 3-kinase B	nervous		F+M
IVNS1ABP	0.00646907	0.0317761	-0.348831	0.78522	influenza virus NS1A binding protein	muscle		F
JAG1	0.00516661	0.0489113	0.634751	1.55267	jagged 1	muscle		M
JAG2	0.000702475	0.0146997	0.274231	1.20935	jagged 2	muscle		F
JHDM1D	0.000137845	0.0156267	0.639598	1.5579	jumonji C domain containing histone demethylase 1 homolog D (S. cerevisiae)	muscle		M
JMJD1C	0.00463658	0.041902	-0.290637	0.817541	jumonji domain containing 1C	nervous		F+M
KAL1	0.00275518	0.038921	0.389998	1.31039	Kallmann syndrome 1 sequence	muscle		M
KANK1	9.8108e-05	0.00597383	0.647671	1.56664	KN motif and ankyrin repeat domains 1	nervous		F+M
KARS	0.00763183	0.0383362	0.307964	1.23796	lysyl-tRNA synthetase	muscle		F
KAT2B	0.00272981	0.0390491	0.489204	1.40367	K(lysine) acetyltransferase 2B	muscle		M
KCNAB1	0.00198636	0.0273258	-1.19657	0.43631	potassium voltage-gated channel, shaker-related subfamily, beta member 1	nervous		F+M
KCNH7	0.0028453	0.0421293	-0.317133	0.802663	potassium voltage-gated channel, subfamily H (eag-related), member 7	muscle		F
KCNJ11	0.000552791	0.022401	-0.649923	0.637314	potassium inwardly-rectifying channel, subfamily J, member 11	muscle		F
KCNJ3	0.00506361	0.0442538	-0.541805	0.686911	potassium inwardly-rectifying channel, subfamily J, member 3	nervous		F+M
KCNMA1	0.000683556	0.0431361	0.409589	1.32831	potassium large conductance calcium-activated channel, subfamily M, alpha member 1	muscle		M
KCNN1	0.00138458	0.0995158	-0.672343	0.627487	potassium intermediate/small conductance calcium-activated channel, subfamily N, member 1	muscle		F+M
KCNN4	0.00113944	0.0960602	-0.468577	0.722677	potassium intermediate/small conductance calcium-activated channel, subfamily N, member 4	muscle		F+M
KCTD13	0.00121707	0.0964057	-0.447385	0.733371	potassium channel tetramerisation domain containing 13	muscle		F+M
KCTD5	0.00347053	0.042305	0.343795	1.26909	potassium channel tetramerisation domain containing 5	muscle		M
KDELR2	0.000834581	0.0155326	-0.362464	0.777835	KDEL (Lys-Asp-Glu-Leu) endoplasmic reticulum protein retention receptor 2	muscle		F
KDM2A	0.00150863	0.0316714	0.408612	1.32741	lysine (K)-specific demethylase 2A	muscle		M
KDM6A	0.00213376	0.0362386	0.592816	1.50819	lysine (K)-specific demethylase 6A	muscle		M
KHDRBS1	0.00935364	0.0413305	0.31502	1.24403	KH domain containing, RNA binding, signal transduction associated 1	muscle		F
KHSRP	0.00227559	0.0224702	0.428014	1.34538	KH-type splicing regulatory protein	muscle		F
KIAA0101	0.00728806	0.0378328	0.340596	1.26628	KIAA0101	muscle		F
KIAA0240	0.00012436	0.0152411	1.07105	2.10096	KIAA0240	muscle		M
KIAA0494	0.00528497	0.0322419	-0.323087	0.799358	KIAA0494	muscle		F
KIAA0562	0.000462157	0.0817295	-0.414549	0.750254	KIAA0562	muscle		F+M
KIAA0776	0.00021317	0.00816269	0.38552	1.30633	KIAA0776	nervous		F+M
KIAA0892	0.00183301	0.0205066	0.292676	1.22491	KIAA0892	muscle		F
KIAA0907	0.000279758	0.0204611	0.356813	1.28059	KIAA0907	muscle		M
KIAA1033	0.00189547	0.0266681	0.402043	1.32138	KIAA1033	nervous		F+M
KIAA1543	0.000227794	0.0753136	-0.300733	0.81184	KIAA1543	muscle		F+M
KIAA1652	0.00128182	0.0299071	0.533652	1.44759	KIAA1652 protein	muscle		F
KIAA1712	0.000509662	0.0824599	0.464752	1.38008	KIAA1712	muscle		F+M
KIAA2022	0.000128826	0.0636122	-0.659539	0.63308	KIAA2022	muscle		F+M
KIAA2026	0.00105921	0.0304305	-0.549503	0.683255	KIAA2026	muscle		F
KIF16B	0.00472803	0.0473282	0.581624	1.49653	kinesin family member 16B	muscle		M
KIF1B	0.000172371	0.00753223	-0.824181	0.564803	kinesin family member 1B	nervous		F+M
KIF2B	0.000719929	0.0834534	-0.57121	0.673052	kinesin family member 2B	muscle		F+M
KIF5B	0.0129244	0.0495229	-0.290664	0.817526	kinesin family member 5B	muscle		F
KLC1	0.00095253	0.0189198	0.508126	1.4222	kinesin light chain 1	nervous		F+M
KLF11	0.00229005	0.0368243	0.635731	1.55372	Kruppel-like factor 11	muscle		M
KLF13	0.000813996	0.0441327	0.820197	1.76565	Kruppel-like factor 13	muscle		M
KLF9	5.48253e-05	0.0146241	0.642275	1.56079	Kruppel-like factor 9	muscle		M
KLHDC3	0.00311141	0.0262336	-0.426913	0.743852	kelch domain containing 3	muscle	duplicate	F
KLHDC3	4.48562e-05	0.00504879	-1.08427	0.47163	kelch domain containing 3	nervous	duplicate	F+M
KLHL20	0.00431945	0.045551	0.400708	1.32016	kelch-like 20 (Drosophila)	muscle		M
KLHL21	0.00579654	0.0476331	0.348853	1.27355	kelch-like 21 (Drosophila)	nervous		F+M
KLHL24	0.000857102	0.0905229	0.489988	1.40443	kelch-like 24 (Drosophila)	muscle		F+M
KLHL31	0.000805113	0.0276739	-0.300776	0.811816	kelch-like 31 (Drosophila)	muscle		F
KLHL32	0.000840526	0.0895181	-0.444399	0.734891	kelch-like 32 (Drosophila)	muscle		F+M
KLHL9	0.00205486	0.0277542	0.342044	1.26755	kelch-like 9 (Drosophila)	nervous		F+M
KPNA1	0.00695801	0.0369749	-0.309035	0.807181	karyopherin alpha 1 (importin alpha 5)	muscle		F
KPNA4	0.00278429	0.0250441	-0.71677	0.608458	karyopherin alpha 4 (importin alpha 3)	muscle		F
KPNB1	0.00303479	0.0260222	-0.396276	0.759817	karyopherin (importin) beta 1	muscle		F
KRCC1	0.00116882	0.0297989	-0.297041	0.81392	lysine-rich coiled-coil 1	muscle		F
KRT31	0.00278937	0.0249785	-0.315007	0.803847	keratin 31	muscle		F
KRT7	0.00064826	0.0855825	-0.407062	0.754158	keratin 7	muscle		F+M
KTN1	0.000595821	0.0143706	0.333752	1.26029	kinectin 1 (kinesin receptor)	nervous		F+M
L3MBTL	0.00263017	0.0243074	0.286155	1.21939	l(3)mbt-like (Drosophila)	muscle		F
LACTB	0.00198167	0.0359854	-0.293141	0.816123	lactamase, beta	muscle		F
LAMA2	0.00339106	0.0418994	0.659453	1.57948	laminin, alpha 2	muscle		M
LAMP1	0.00138322	0.018256	0.358673	1.28225	lysosomal-associated membrane protein 1	muscle		F
LAMP2	7.26127e-05	0.0053884	0.864183	1.82031	lysosomal-associated membrane protein 2	nervous		F+M
LARP1	0.00106342	0.0305202	0.430425	1.34763	La ribonucleoprotein domain family, member 1	muscle		M
LARP5	0.000653957	0.0857392	0.425555	1.34309	La ribonucleoprotein domain family, member 5	muscle		F+M
LARS	0.00472429	0.0495057	-0.330817	0.795086	leucyl-tRNA synthetase	muscle		F
LASS6	0.000270768	0.0211694	0.910438	1.87962	LAG1 homolog, ceramide synthase 6	muscle		M
LDHA	0.00115	0.0960977	-0.846391	0.556174	lactate dehydrogenase A	muscle		F+M
LEMD3	8.63823e-05	0.0156684	0.696843	1.62095	LEM domain containing 3	muscle		M
LEPR	0.000245529	0.0210071	1.21047	2.31413	leptin receptor	muscle		M
LEPROT	4.7242e-05	0.00501347	0.547292	1.46134	leptin receptor overlapping transcript///leptin receptor	nervous		F+M
LGR4	0.000991417	0.0935362	-0.338994	0.790592	Leucine-rich repeat-containing G protein-coupled receptor 4, mRNA (cDNA clone MGC:33719 IMAGE:5260923)	muscle		F+M
LIG4	0.00326853	0.034392	-0.395317	0.760322	ligase IV, DNA, ATP-dependent	nervous		F+M
LIMCH1	0.00262246	0.0331039	0.568375	1.48285	LIM and calponin homology domains 1	muscle		M
LIN7C	0.000108248	0.0148746	0.96015	1.94551	lin-7 homolog C (C. elegans)	muscle		M
LOC100127922	0.00352636	0.0274937	0.271762	1.20728	similar to mCG21560///SMT3 suppressor of mif two 3 homolog 4 (S. cerevisiae)///SMT3 suppressor of mif two 3 homolog 2 (S. cerevisiae)	muscle	duplicate	F
LOC100127922	0.00125153	0.0297131	0.39202	1.31223	similar to mCG21560///SMT3 suppressor of mif two 3 homolog 4 (S. cerevisiae)///SMT3 suppressor of mif two 3 homolog 2 (S. cerevisiae)	muscle	duplicate	M
LOC100128223	0.000302452	0.0761567	0.573589	1.48822	hypothetical protein LOC100128223 /// TAR DNA binding protein	muscle		F+M
LOC100128495	0.0102291	0.0436239	0.353406	1.27757	similar to mCG1035404///ribosomal protein L21 pseudogene 68///leucine rich repeat containing 16A	muscle		F
LOC100128570	0.000251907	0.0754163	-0.36738	0.775189	hypothetical protein LOC100128570	muscle		F+M
LOC100128836	0.00013299	0.00994631	0.301742	1.23263	similar to heterogeneous nuclear ribonucleoprotein A1///heterogeneous nuclear ribonucleoprotein A1 pseudogene///heterogeneous nuclear ribonucleoprotein A1-like 1///heterogeneous nuclear ribonucleoprotein A1 pseudogene///heterogeneous nuclear ribonucleopro	muscle		F
LOC100130100	0.000251252	0.0758171	-0.632579	0.645022	similar to hCG26659	muscle		F+M
LOC100131226	0.00132492	0.0981975	-0.961042	0.513686	hypothetical protein LOC100131226	muscle		F+M
LOC100131347	0.000751233	0.0855178	-0.283593	0.821542	hypothetical protein LOC100131347	muscle		F+M
LOC100131851	0.000745019	0.0441215	0.436523	1.35334	hypothetical LOC100131851///single stranded DNA binding protein 4 pseudogene///single stranded DNA binding protein 3 pseudogene///single stranded DNA binding protein 3	muscle		M
LOC100132218	0.000715472	0.0839607	0.43981	1.35643	hypothetical protein LOC100132218 /// hypothetical LOC728555	muscle		F+M
LOC100132247	0.000637906	0.0140015	0.421698	1.3395	similar to Uncharacterized protein KIAA0220///nuclear pore complex interacting protein pseudogene///nuclear pore complex interacting protein-like 3	muscle		F
LOC100132352	0.000452616	0.0819481	0.34644	1.27142	PREDICTED: Homo sapiens similar to hCG1989297, transcript variant 1 (LOC100132352), mRNA	muscle		F+M
LOC100132502	0.000886502	0.0910974	-0.267046	0.831019	hypothetical protein LOC100132502 /// non-protein coding RNA 166	muscle		F+M
LOC100132999	0.00443574	0.0483751	-0.375915	0.770616	hypothetical protein LOC100132999	muscle		F
LOC100133130	0.000691518	0.0837341	0.49554	1.40985	PRO1102	muscle		F+M
LOC100134053	0.000117965	0.0640742	0.45906	1.37465	similar to POLR2J4 protein /// PMS2 postmeiotic segregation increased 2 (S. cerevisiae)-like /// postmeiotic segregation increased 2-like protein 12 /// polymerase (RNA) II (DNA directed) polypeptide J2 /// polymerase (RNA) II (DNA directed) polypeptide J	muscle		F+M
LOC100134371	0.00194492	0.0356544	-0.276461	0.825614	similar to dual specificity phosphatase 22///dual specificity phosphatase 22	muscle		F
LOC100134401	0.000248267	0.0755157	0.792627	1.73223	hypothetical protein LOC100134401	muscle		F+M
LOC100170939	0.000818646	0.0879268	0.973652	1.96381	glucuronidase, beta pseudogene	muscle		F+M
LOC150776	0.000961084	0.0161057	0.27347	1.20871	sphingomyelin phosphodiesterase 4, neutral membrane pseudogene///sphingomyelin phosphodiesterase 4, neutral membrane (neutral sphingomyelinase-3)	muscle		F
LOC151760	0.000540141	0.0828102	-0.32443	0.798614	hypothetical LOC151760	muscle		F+M
LOC171220	0.00044752	0.012498	-0.565229	0.675848	destrin-2 pseudogene	nervous		F+M
LOC255654	0.000346081	0.0792681	-0.291473	0.817067	hypothetical protein LOC255654	muscle		F+M
LOC283481	0.000159118	0.0679762	0.632832	1.55061	hypothetical protein LOC283481	muscle		F+M
LOC283486	2.49338e-05	0.0592513	0.29408	1.2261	hypothetical protein LOC283486	muscle		F+M
LOC284422	0.000544728	0.0825153	-0.308114	0.807697	similar to HSPC323	muscle		F+M
LOC285147	0.000491943	0.0813234	0.784083	1.722	hypothetical protein LOC285147	muscle		F+M
LOC338758	0.00178876	0.0347791	0.417167	1.3353	hypothetical LOC338758	muscle		F
LOC400568	3.1834e-05	0.0672429	-0.402554	0.756518	hypothetical LOC400568	muscle		F+M
LOC400573	0.000765761	0.0270457	-0.514267	0.700149	hypothetical gene supported by BC015790; BC041634	muscle		F
LOC400684	0.000645567	0.0861241	-0.290226	0.817774	hypothetical gene supported by BC000922	muscle		F+M
LOC400960	0.000325894	0.0779305	0.33805	1.26405	hypothetical gene supported by BC040598	muscle		F+M
LOC401317	0.00276575	0.0422516	-0.520848	0.696962	hypothetical LOC401317	muscle		F
LOC440895	4.13877e-05	0.0132776	-0.496668	0.708742	LIM and senescent cell antigen-like domains 3-like	muscle		F
LOC440926	0.00321101	0.0214291	0.547804	1.46186	H3 histone, family 3A pseudogene///H3 histone, family 3B (H3.3B)///H3 histone, family 3A	muscle	duplicate	F
LOC440926	0.002201	0.0289901	0.422688	1.34042	H3 histone, family 3A pseudogene///H3 histone, family 3B (H3.3B)///H3 histone, family 3A	nervous	duplicate	F+M
LOC441108	0.000491009	0.0815234	-0.825359	0.564342	hypothetical gene supported by AK128882	muscle		F+M
LOC641467	0.00120658	0.0963777	-0.465344	0.724298	hypothetical LOC641467	muscle		F+M
LOC642502	0.000622793	0.0140516	-0.967837	0.511272	succinate dehydrogenase complex, subunit C, integral membrane protein, 15kDa pseudogene///succinate dehydrogenase complex, subunit C, integral membrane protein, 15kDa	muscle		F
LOC646903	0.00353192	0.0447268	-0.416203	0.749394	hypothetical LOC646903	muscle		F
LOC647979	0.000238395	0.00876708	-0.761788	0.589765	hypothetical LOC647979	nervous		F+M
LOC648390	2.40601e-05	0.0609866	-0.37274	0.772314	similar to ubiquitin B /// ribosomal protein S27a /// ubiquitin B /// ubiquitin C	muscle		F+M
LOC650794	0.00349534	0.0445568	-0.403813	0.755858	similar to FRAS1 related extracellular matrix protein 2	muscle		F
LOC652637	0.00163784	0.0322911	0.813878	1.75793	similar to junction-mediating and regulatory protein///WAS protein homolog associated with actin, golgi membranes and microtubules-like 1	muscle		M
LOC653354	0.00270103	0.0312538	0.280739	1.21482	armadillo repeat containing, X-linked 6 pseudogene///armadillo repeat containing, X-linked 6	nervous		F+M
LOC653566	0.00331602	0.0270005	-0.302605	0.810787	signal peptidase complex subunit 2 homolog pseudogene///signal peptidase complex subunit 2 homolog (S. cerevisiae)	muscle		F
LOC728142	0.00117438	0.0962316	-0.398335	0.758733	hypothetical LOC728142	muscle		F+M
LOC728192	0.000788573	0.087413	-0.297751	0.81352	Homo sapiens, clone IMAGE:3891572, mRNA	muscle		F+M
LOC728198	0.00067439	0.0849048	0.55131	1.46542	similar to transcription associated factor TAFII31L /// TAF9B RNA polymerase II, TATA box binding protein (TBP)-associated factor, 31kDa	muscle		F+M
LOC728344	1.72672e-05	0.00581134	-0.369417	0.774095	glutaredoxin 3 pseudogene	muscle		F
LOC728564	0.00198852	0.0211899	-0.452317	0.730868	guanine monphosphate synthetase pseudogene	muscle		F
LOC730107	0.00109893	0.0166679	-0.332545	0.794134	similar to Glycine cleavage system H protein, mitochondrial///glycine cleavage system protein H (aminomethyl carrier)	muscle		F
LOC732160	0.000457475	0.0128304	-0.402117	0.756747	similar to NADH dehydrogenase (ubiquinone) 1 alpha subcomplex, 10, 42kDa precursor///NADH dehydrogenase (ubiquinone) 1 alpha subcomplex, 10, 42kDa	muscle		F
LOC81691	0.000455302	0.0816568	-0.472858	0.720536	exonuclease NEF-sp	muscle		F+M
LOC90835	0.00081836	0.088145	-0.311885	0.805588	hypothetical protein LOC90835	muscle		F+M
LONP1	0.00408804	0.0445615	0.583906	1.4989	lon peptidase 1, mitochondrial	muscle		M
LONP2	0.00025436	0.0742678	0.84405	1.79508	Lon peptidase 2, peroxisomal (LONP2), mRNA	muscle	duplicate	F+M
LONP2	0.00491469	0.0434636	0.437401	1.35416	lon peptidase 2, peroxisomal	nervous	duplicate	F+M
LONRF3	4.61394e-05	0.0136634	0.436544	1.35336	LON peptidase N-terminal domain and ring finger 3	muscle	duplicate	F
LONRF3	0.000384531	0.0336415	0.641968	1.56046	LON peptidase N-terminal domain and ring finger 3	muscle	duplicate	M
LOXL4	4.76659e-05	0.0584621	0.702733	1.62758	lysyl oxidase-like 4	muscle		F+M
LPCAT2	0.00403698	0.0468112	-0.281801	0.822563	lysophosphatidylcholine acyltransferase 2	muscle		F
LPCAT3	0.00326467	0.0344489	-0.396152	0.759882	lysophosphatidylcholine acyltransferase 3	nervous		F+M
LPIN1	0.00109506	0.0196492	0.453646	1.3695	lipin 1	nervous		F+M
LPP	3.82897e-05	0.0582331	0.717944	1.64484	LIM domain containing preferred translocation partner in lipoma	muscle		F+M
LRFN1	0.00252853	0.0407287	-0.351724	0.783647	leucine rich repeat and fibronectin type III domain containing 1	muscle		F
LRIG1	8.4568e-05	0.00560914	0.726526	1.65465	leucine-rich repeats and immunoglobulin-like domains 1	nervous		F+M
LRP4	0.00194948	0.0270186	0.642435	1.56096	low density lipoprotein receptor-related protein 4	nervous		F+M
LRRC14	0.000290247	0.0761076	-0.434864	0.739764	leucine rich repeat containing 14	muscle		F+M
LRRC27	0.00125806	0.0968285	-0.587171	0.665647	leucine rich repeat containing 27	muscle		F+M
LRRC39	0.000820376	0.0279489	-0.439296	0.737494	leucine rich repeat containing 39	muscle		F
LRRFIP1	0.000789883	0.0873037	0.561736	1.47604	LRR FLI-I interacting protein 1 (LRRFIP1)	muscle		F+M
LSM4	0.00766348	0.0383046	-0.529684	0.692706	LSM4 homolog, U6 small nuclear RNA associated (S. cerevisiae)	muscle	duplicate	F
LSM4	0.0011797	0.030223	0.341906	1.26743	LSM4 homolog, U6 small nuclear RNA associated (S. cerevisiae)	muscle	duplicate	M
LTV1	3.53781e-05	0.0640535	-0.441633	0.736301	LTV1 homolog (S. cerevisiae)	muscle		F+M
LUC7L3	0.00415753	0.0290498	0.540571	1.45455	LUC7-like 3 (S. cerevisiae)	muscle		F
LY6G5B	0.00403363	0.0446119	0.379761	1.30113	lymphocyte antigen 6 complex, locus G5B///casein kinase 2, beta polypeptide	muscle		M
LY6H	6.18632e-06	0.00416407	-0.338699	0.790754	lymphocyte antigen 6 complex, locus H	muscle		F
LY9	0.0013776	0.0997682	0.965788	1.95313	lymphocyte antigen 9	muscle		F+M
LYPLA1	0.0011645	0.0167964	-0.431837	0.741318	lysophospholipase I	muscle		F
LYRM5	7.85865e-05	0.011636	-0.460842	0.726562	LYR motif containing 5	muscle		F
LYRM7	0.00262812	0.0416361	-0.361449	0.778382	Lyrm7 homolog (mouse)	muscle	duplicate	F
LYRM7	0.000618415	0.0851921	0.522665	1.43661	Lyrm7 homolog (mouse)	muscle	duplicate	F+M
MAFK	0.000315698	0.0178729	0.431424	1.34856	v-maf musculoaponeurotic fibrosarcoma oncogene homolog K (avian)	muscle		F
MAGED1	0.00238994	0.0371144	0.464169	1.37952	melanoma antigen family D, 1	muscle		M
MAGI2	0.00115123	0.0959897	0.343761	1.26906	Membrane associated guanylate kinase 2 (MAGI-2)	muscle		F+M
MAL	0.000308081	0.0100378	0.493939	1.40828	mal, T-cell differentiation protein	nervous		F+M
MAN1A1	0.00234988	0.029891	-0.723092	0.605798	mannosidase, alpha, class 1A, member 1	nervous		F+M
MAOA	0.00538967	0.0434498	0.390516	1.31086	monoamine oxidase A	nervous		F+M
MAP1B	0.000880712	0.0909944	-0.419835	0.74751	microtubule-associated protein 1B	muscle	duplicate	F+M
MAP1B	2.10833e-05	0.00355954	-1.23808	0.423935	microtubule-associated protein 1B	nervous	duplicate	F+M
MAP2	0.000321349	0.00748866	-1.01267	0.495627	microtubule-associated protein 2	nervous		F+M
MAP2K4	0.000775293	0.0149815	-0.567949	0.674575	mitogen-activated protein kinase kinase 4	muscle		F
MAP3K5	0.00938103	0.0413159	-0.33807	0.791099	mitogen-activated protein kinase kinase kinase 5	muscle	duplicate	F
MAP3K5	0.000193031	0.00787889	0.441172	1.35771	mitogen-activated protein kinase kinase kinase 5	nervous	duplicate	F+M
MAP4	0.00393307	0.0382426	0.269167	1.20511	microtubule-associated protein 4	nervous		F+M
MAP4K4	0.00140015	0.0320846	-0.336921	0.791729	mitogen-activated protein kinase kinase kinase kinase 4	muscle		F
MAP4K5	0.0014059	0.0226059	-0.289938	0.817937	mitogen-activated protein kinase kinase kinase kinase 5	nervous		F+M
MAPK1	0.00218417	0.0366826	0.415138	1.33343	mitogen-activated protein kinase 1	muscle	duplicate	M
MAPK1	0.0018848	0.0266188	-0.541443	0.687083	mitogen-activated protein kinase 1	nervous	duplicate	F+M
MAPK9	0.00210752	0.0267768	-0.615782	0.652576	mitogen-activated protein kinase 9	nervous		F+M
MAPKAP1	0.00494915	0.0436643	-0.392174	0.76198	mitogen-activated protein kinase associated protein 1	nervous		F+M
MAPRE2	0.000921146	0.015697	-0.382805	0.766945	microtubule-associated protein, RP/EB family, member 2	muscle		F
MAPT	0.000347356	0.010582	-0.828125	0.563261	microtubule-associated protein tau	nervous		F+M
MARCH6	0.00249451	0.0373319	0.627272	1.54464	membrane-associated ring finger (C3HC4) 6	muscle		M
MARCH7	0.00321009	0.0411199	0.73042	1.65912	membrane-associated ring finger (C3HC4) 7	muscle		M
MARCH8	0.000250392	0.0210265	0.755348	1.68804	membrane-associated ring finger (C3HC4) 8	muscle		M
MARS	0.00774208	0.0383651	-0.270064	0.829283	methionyl-tRNA synthetase	muscle		F
MATR3	0.00413859	0.042782	0.49664	1.41092	matrin 3	muscle		M
MAX	0.000322194	0.0790339	-0.326137	0.797669	MYC associated factor X	muscle		F+M
MBD6	0.0005228	0.0218765	0.516357	1.43034	methyl-CpG binding domain protein 6	muscle	duplicate	F
MBD6	0.000397515	0.0795478	0.779186	1.71616	methyl-CpG binding domain protein 6	muscle	duplicate	F+M
MBNL2	0.0112009	0.0459254	-0.319091	0.801575	muscleblind-like 2 (Drosophila)	muscle	duplicate	F
MBNL2	0.0047602	0.0427074	-0.488251	0.712889	muscleblind-like 2 (Drosophila)	nervous	duplicate	F+M
MBOAT1	0.00123686	0.0963673	0.322128	1.25017	membrane bound O-acyltransferase domain containing 1	muscle		F+M
MBP	0.000606182	0.0841164	0.814296	1.75844	myelin basic protein	muscle		F+M
MC3R	0.00359437	0.0278092	-0.315605	0.803514	melanocortin 3 receptor	muscle		F
MCCC1	0.0130518	0.0498693	0.323601	1.25145	methylcrotonoyl-CoA carboxylase 1 (alpha)	muscle		F
MCEE	0.000440283	0.0214553	-0.414037	0.75052	methylmalonyl CoA epimerase	muscle		F
MCL1	0.00534893	0.0454911	0.477031	1.39188	myeloid cell leukemia sequence 1 (BCL2-related)	nervous		F+M
MCM3AP	0.00420086	0.0291008	0.484202	1.39881	minichromosome maintenance complex component 3 associated protein	muscle	duplicate	F
MCM3AP	0.000475798	0.0811233	0.346371	1.27136	minichromosome maintenance complex component 3 associated protein	muscle	duplicate	F+M
MCTS1	0.00707481	0.0373499	-0.317437	0.802494	malignant T cell amplified sequence 1	muscle		F
MDC1	0.00415986	0.029016	0.313425	1.24265	mediator of DNA-damage checkpoint 1	muscle		F
MDH1	0.0031999	0.0265911	-0.427923	0.743331	malate dehydrogenase 1, NAD (soluble)	muscle		F
MDM4	0.000804383	0.0878844	0.385127	1.30597	Mdm4 p53 binding protein homolog (mouse)	muscle		F+M
ME2	0.000119688	0.00965761	-0.458836	0.727573	malic enzyme 2, NAD(+)-dependent, mitochondrial	muscle		F
MECR	3.41132e-07	0.000688857	-0.372639	0.772368	mitochondrial trans-2-enoyl-CoA reductase	muscle		F
MED13	0.0019358	0.0346959	0.349551	1.27416	mediator complex subunit 13	muscle		M
MED21	0.00279344	0.0249045	-0.397092	0.759387	mediator complex subunit 21	muscle		F
MED6	0.00217631	0.0289731	-0.368073	0.774817	mediator complex subunit 6	nervous		F+M
MEF2C	9.23499e-06	0.00245012	-0.948197	0.51828	myocyte enhancer factor 2C	nervous		F+M
MEF2D	0.00109116	0.0197704	-0.261362	0.8343	myocyte enhancer factor 2D	nervous		F+M
MEGF8	0.000115184	0.00629162	-0.809208	0.570695	multiple EGF-like-domains 8	nervous		F+M
MEIS3P1	0.000398447	0.0126708	-0.440811	0.73672	Meis homeobox 3 pseudogene 1	muscle		F
METAP2	0.00212019	0.0361436	0.539424	1.45339	methionyl aminopeptidase 2	muscle		M
METTL11A	0.00356579	0.0447144	-0.300055	0.812221	methyltransferase like 11A	muscle		F
METTL2A	0.000576351	0.0228742	-0.72667	0.604297	methyltransferase like 2A///methyltransferase like 2B	muscle		F
METTL7A	0.0115605	0.0464565	0.37004	1.29239	methyltransferase like 7A	muscle	duplicate	F
METTL7A	0.00046062	0.0124882	0.649545	1.56867	methyltransferase like 7A	nervous	duplicate	F+M
MEX3C	0.000971639	0.0942425	0.444403	1.36075	mex-3 homolog C (C. elegans)	muscle		F+M
MFAP3L	0.00262279	0.0315271	0.431333	1.34848	microfibrillar-associated protein 3-like	nervous		F+M
MFF	0.000602502	0.0208221	-0.447333	0.733397	mitochondrial fission factor	muscle		F
MFGE8	0.00510165	0.0316009	0.425042	1.34261	milk fat globule-EGF factor 8 protein	muscle		F
MFN1	0.00597403	0.0295971	-0.307571	0.808001	mitofusin 1	muscle		F
MGST1	0.000684752	0.0850825	1.89315	3.71444	microsomal glutathione S-transferase 1	muscle		F+M
MICAL2	0.0121263	0.0477327	0.456915	1.3726	microtubule associated monoxygenase, calponin and LIM domain containing 2	muscle		F
MICB	0.000287847	0.0760024	0.550647	1.46474	MHC class I polypeptide-related sequence B	muscle		F+M
MID1	0.00586654	0.0478905	0.262269	1.19936	midline 1 (Opitz/BBB syndrome)	nervous		F+M
MIOS	0.00122333	0.0296648	0.954183	1.93748	missing oocyte, meiosis regulator, homolog (Drosophila)	muscle		M
MKRN1	0.00439206	0.0280402	0.294446	1.22641	makorin ring finger protein 1	muscle	duplicate	F
MKRN1	0.00323642	0.041066	0.51075	1.42479	makorin ring finger protein 1	muscle	duplicate	M
MKX	0.00137447	0.0999219	0.909355	1.87821	mohawk homeobox	muscle		F+M
MLC1	0.000632873	0.0148778	0.473902	1.38886	megalencephalic leukoencephalopathy with subcortical cysts 1	nervous		F+M
MLEC	0.00121053	0.0170941	-0.343807	0.787959	malectin	muscle		F
MLF1	0.00377612	0.0283465	-0.49261	0.710738	myeloid leukemia factor 1	muscle	duplicate	F
MLF1	0.000580927	0.0255754	-0.750881	0.594241	myeloid leukemia factor 1	muscle	duplicate	M
MLF1	0.000364513	0.0783011	-1.17501	0.442882	myeloid leukemia factor 1	muscle	duplicate	F+M
MLH3	0.000101472	0.0143792	-0.398404	0.758697	mutL homolog 3 (E. coli)	muscle		M
MMD2	0.00193558	0.0356529	-0.306571	0.808561	monocyte to macrophage differentiation-associated 2	muscle		F
MMS19	0.00118753	0.0960671	-0.638626	0.642324	MMS19 nucleotide excision repair homolog (S. cerevisiae)	muscle		F+M
MOBKL3	0.00130308	0.0303023	0.322275	1.2503	MOB1, Mps One Binder kinase activator-like 3 (yeast)	muscle		M
MOBP	2.15007e-05	0.0583918	-0.906574	0.533451	myelin-associated oligodendrocyte basic protein	muscle		F+M
MOCS2	0.0038969	0.0286671	-0.437455	0.738436	molybdenum cofactor synthesis 2	muscle	duplicate	F
MOCS2	0.00081462	0.0882422	-0.374818	0.771203	molybdenum cofactor synthesis 2	muscle	duplicate	F+M
MORC4	0.00194119	0.0345196	0.442809	1.35925	MORC family CW-type zinc finger 4	muscle		M
MORF4L1	0.003449	0.0421558	0.491487	1.40589	mortality factor 4 like 1	muscle		M
MORF4L2	0.00172486	0.0344055	0.429419	1.34669	mortality factor 4 like 2	muscle		F
MPPED2	0.0030317	0.0399637	0.773475	1.70938	metallophosphoesterase domain containing 2	muscle		M
MPRIP	0.00466225	0.0491737	-0.419113	0.747884	myosin phosphatase Rho interacting protein	muscle		F
MRC1L1	0.0016352	0.0323798	0.593179	1.50857	mannose receptor, C type 1-like 1///mannose receptor, C type 1	muscle		M
MRPL12	0.00102324	0.0162059	-0.492744	0.710672	mitochondrial ribosomal protein L12	muscle		F
MRPL13	0.000115301	0.0097013	-0.363982	0.777017	mitochondrial ribosomal protein L13	muscle		F
MRPL15	0.000472507	0.0127219	-0.32245	0.79971	mitochondrial ribosomal protein L15	muscle		F
MRPL18	0.00021939	0.0116584	-0.289221	0.818344	mitochondrial ribosomal protein L18	muscle		F
MRPL19	4.33289e-05	0.0151629	0.939664	1.91808	mitochondrial ribosomal protein L19	muscle		M
MRPL20	9.45187e-05	0.0609108	-0.447113	0.733509	mitochondrial ribosomal protein L20	muscle		F+M
MRPL28	0.00233531	0.0298078	-0.379415	0.768749	mitochondrial ribosomal protein L28	nervous		F+M
MRPL3	0.000682898	0.0145157	-0.413906	0.750588	mitochondrial ribosomal protein L3	muscle		F
MRPL34	0.000306218	0.0120069	-0.571586	0.672876	mitochondrial ribosomal protein L34	muscle		F
MRPL36	6.5548e-05	0.0126171	-0.380025	0.768424	mitochondrial ribosomal protein L36	muscle		F
MRPL39	0.00435987	0.0294941	-0.314668	0.804036	mitochondrial ribosomal protein L39	muscle		F
MRPL4	0.00229813	0.0381344	-0.847459	0.555763	mitochondrial ribosomal protein L4	muscle		F
MRPL40	0.0047693	0.0475316	0.343258	1.26862	mitochondrial ribosomal protein L40	muscle		M
MRPL41	0.000681626	0.0238656	-0.588837	0.664879	mitochondrial ribosomal protein L41	muscle		F
MRPL47	0.00467168	0.0491386	-0.355346	0.781682	mitochondrial ribosomal protein L47	muscle		F
MRPL48	0.00358844	0.0278166	-0.389924	0.76317	mitochondrial ribosomal protein L48	muscle		F
MRPS12	0.00390942	0.0285511	-0.481978	0.715996	mitochondrial ribosomal protein S12	muscle	duplicate	F
MRPS12	3.26163e-06	0.00242295	-0.833186	0.561288	mitochondrial ribosomal protein S12	nervous	duplicate	F+M
MRPS15	0.000163857	0.0105041	-0.441688	0.736273	mitochondrial ribosomal protein S15	muscle		F
MRPS16	0.000452541	0.0362922	-0.957995	0.514772	mitochondrial ribosomal protein S16	muscle		M
MRPS18A	8.93433e-05	0.00902066	-0.344478	0.787593	mitochondrial ribosomal protein S18A	muscle		F
MRPS18B	0.000371328	0.0123939	-0.285405	0.820511	mitochondrial ribosomal protein S18B	muscle		F
MRPS28	0.00152948	0.0186617	-0.372282	0.772559	mitochondrial ribosomal protein S28	muscle		F
MRPS30	0.000496252	0.0128474	-0.496235	0.708955	mitochondrial ribosomal protein S30	muscle		F
MRPS33	7.43303e-05	0.00833872	-0.334386	0.793121	mitochondrial ribosomal protein S33	muscle		F
MRPS7	0.000633465	0.01398	-0.350606	0.784255	mitochondrial ribosomal protein S7	muscle		F
MRS2	0.00159324	0.0192939	-0.398597	0.758596	MRS2 magnesium homeostasis factor homolog (S. cerevisiae)	muscle		F
MSH3	0.000392245	0.0797525	0.480114	1.39485	mutS homolog 3 (E. coli)	muscle		F+M
MSN	0.000660255	0.0154239	0.560103	1.47437	moesin	nervous		F+M
MSRB3	0.000163932	0.0670209	-0.542777	0.686448	methionine sulfoxide reductase B3	muscle		F+M
MT1B	0.00590585	0.0480004	0.494938	1.40926	metallothionein 1B	nervous		F+M
MT1E	0.00339316	0.0348157	0.573591	1.48822	metallothionein 1E	nervous		F+M
MT1G	0.00296124	0.032931	0.791424	1.73078	metallothionein 1G	nervous		F+M
MT1P2	0.00254958	0.0375925	0.870741	1.8286	metallothionein 1 pseudogene 2	muscle		M
MT2A	0.000713445	0.028132	0.863962	1.82003	metallothionein 2A	muscle		M
MTCH2	9.05815e-05	0.00892261	-0.467308	0.723313	mitochondrial carrier homolog 2 (C. elegans)	muscle		F
MTERFD3	0.000325376	0.0338517	0.657772	1.57764	MTERF domain containing 3	muscle		M
MTFMT	0.00126918	0.0301605	-0.621987	0.649775	mitochondrial methionyl-tRNA formyltransferase	muscle		F
MTHFD1	0.00112794	0.0959412	0.442274	1.35874	methylenetetrahydrofolate dehydrogenase (NADP+ dependent) 1, methenyltetrahydrofolate cyclohydrolase, formyltetrahydrofolate synthetase	muscle		F+M
MTMR3	0.000544979	0.0242281	1.0373	2.05239	myotubularin related protein 3	muscle		M
MTO1	0.00185407	0.0309284	-0.364844	0.776553	mitochondrial translation optimization 1 homolog (S. cerevisiae)	muscle		F
MTRR	0.000233558	0.0116452	-0.372213	0.772597	5-methyltetrahydrofolate-homocysteine methyltransferase reductase	muscle		F
MTSS1	0.000750817	0.0149374	0.513356	1.42737	metastasis suppressor 1	muscle	duplicate	F
MTSS1	0.000959431	0.0295961	0.688898	1.61205	metastasis suppressor 1	muscle	duplicate	M
MTSS1	0.00243975	0.0303076	0.388698	1.30921	metastasis suppressor 1	nervous	duplicate	F+M
MTX2	0.000289249	0.012043	-0.462008	0.725975	metaxin 2	muscle		F
MUDENG	0.00435565	0.029515	-0.379838	0.768524	MU-2/AP1M2 domain containing, death-inducing	muscle		F
MUM1L1	0.000825758	0.0441486	0.54566	1.45969	melanoma associated antigen (mutated) 1-like 1	muscle		M
MXRA7	0.00112499	0.0959051	-0.481319	0.716322	matrix-remodelling associated 7	muscle		F+M
MYBPC2	0.000866441	0.0910036	-0.966953	0.511585	myosin binding protein C, fast type	muscle		F+M
MYCBP2	0.000618667	0.0846752	0.686598	1.60948	MYC binding protein 2	muscle		F+M
MYCL1	0.000286049	0.0771346	-0.683182	0.62279	v-myc myelocytomatosis viral oncogene homolog 1, lung carcinoma derived (avian)	muscle		F+M
MYH8	0.0127819	0.0492102	0.800301	1.74146	myosin, heavy chain 8, skeletal muscle, perinatal	muscle	duplicate	F
MYH8	0.00166442	0.0333138	1.54186	2.9117	myosin, heavy chain 8, skeletal muscle, perinatal	muscle	duplicate	M
MYL12A	0.00279152	0.0319034	0.49537	1.40968	myosin, light chain 12A, regulatory, non-sarcomeric	nervous		F+M
MYLK3	0.00341322	0.0418313	0.847588	1.79949	myosin light chain kinase 3	muscle		M
MYO10	0.000189644	0.00782662	0.804546	1.7466	myosin X	nervous		F+M
MYOM2	9.62654e-05	0.00925672	0.44053	1.3571	myomesin (M-protein) 2, 165kDa	muscle		F
MYOM3	0.000288541	0.0182099	-0.978655	0.507453	myomesin family, member 3	muscle		F
MYST4	0.0012861	0.0972156	-0.398572	0.758609	MYST histone acetyltransferase (monocytic leukemia) 4	muscle		F+M
NAA35	0.00495373	0.0311142	-0.288706	0.818636	N(alpha)-acetyltransferase 35, NatC auxiliary subunit	muscle		F
NAA50	0.00292441	0.0392338	0.53523	1.44917	N(alpha)-acetyltransferase 50, NatE catalytic subunit	muscle		M
NACAP1	0.00224814	0.0368029	0.586693	1.5018	nascent-polypeptide-associated complex alpha polypeptide pseudogene 1	muscle		M
NADK	0.000443736	0.0798584	-0.765264	0.588346	NAD kinase	muscle		F+M
NAMPT	0.00767658	0.0374936	-0.434355	0.740024	nicotinamide phosphoribosyltransferase	muscle		F
NAP1L1	0.0115432	0.0464795	0.276109	1.21092	nucleosome assembly protein 1-like 1	muscle		F
NAPG	0.000153806	0.00714106	-0.761177	0.590015	N-ethylmaleimide-sensitive factor attachment protein, gamma	nervous		F+M
NARG1	0.00118277	0.0960908	0.404186	1.32334	NMDA receptor regulated 1, mRNA (cDNA clone IMAGE:5499884)	muscle		F+M
NAT11	0.000699307	0.0838758	-0.30897	0.807218	N-acetyltransferase 11 (GCN5-related, putative)	muscle		F+M
NBLA00301	0.000921634	0.0929492	-0.404945	0.755265	Nbla00301	muscle		F+M
NBPF10	0.00877884	0.0407423	0.333627	1.26018	neuroblastoma breakpoint family, member 10///neuroblastoma breakpoint family, member 16///neuroblastoma breakpoint family, member 24///neuroblastoma breakpoint family, member 8///neuroblastoma breakpoint family, member 12///hypothetical LOC440670///neurob	muscle		F
NCDN	0.00121983	0.0297388	0.618635	1.53542	neurochondrin	muscle		M
NCK1	0.000161606	0.0172816	-0.346095	0.786711	NCK adaptor protein 1	muscle		F
NCRNA00105	0.000229498	0.0752226	-0.373274	0.772028	non-protein coding RNA 105	muscle		F+M
NCRNA00116	3.53692e-05	0.0136162	-0.451554	0.731255	non-protein coding RNA 116	muscle	duplicate	F
NCRNA00116	0.000462407	0.0363266	-0.842707	0.557597	non-protein coding RNA 116	muscle	duplicate	M
NCRNA00116	0.000932782	0.0933307	-0.353649	0.782602	non-protein coding RNA 116	muscle	duplicate	F+M
NCRNA00219	0.0033725	0.0449247	0.327519	1.25485	non-protein coding RNA 219	muscle		F
NDP	0.000170421	0.00753569	0.399049	1.31864	Norrie disease (pseudoglioma)	nervous		F+M
NDRG1	0.000678132	0.0156447	0.440697	1.35726	N-myc downstream regulated 1	nervous		F+M
NDRG2	0.00920065	0.0412411	-1.25592	0.418727	NDRG family member 2	muscle		F
NDUFA12	0.000803468	0.0278661	-0.315323	0.803671	NADH dehydrogenase (ubiquinone) 1 alpha subcomplex, 12	muscle		F
NDUFA8	0.00414424	0.0290575	-0.324489	0.798581	NADH dehydrogenase (ubiquinone) 1 alpha subcomplex, 8, 19kDa	muscle		F
NDUFA9	0.00962884	0.0417696	-0.265724	0.831781	NADH dehydrogenase (ubiquinone) 1 alpha subcomplex, 9, 39kDa	muscle		F
NDUFAF4	0.000620436	0.0141566	-0.40862	0.753343	NADH dehydrogenase (ubiquinone) 1 alpha subcomplex, assembly factor 4	muscle		F
NDUFB10	0.000311706	0.0179103	-0.628972	0.646637	NADH dehydrogenase (ubiquinone) 1 beta subcomplex, 10, 22kDa	muscle		F
NDUFB5	0.00307127	0.0261684	-0.323352	0.799211	NADH dehydrogenase (ubiquinone) 1 beta subcomplex, 5, 16kDa	muscle	duplicate	F
NDUFB5	0.00123425	0.0965598	-0.296385	0.81429	NADH dehydrogenase (ubiquinone) 1 beta subcomplex, 5, 16kDa	muscle	duplicate	F+M
NDUFC1	5.44235e-05	0.0123245	-0.748194	0.595348	NADH dehydrogenase (ubiquinone) 1, subcomplex unknown, 1, 6kDa	muscle		F
NDUFS1	0.00100015	0.0164867	-0.432262	0.741099	NADH dehydrogenase (ubiquinone) Fe-S protein 1, 75kDa (NADH-coenzyme Q reductase)	muscle		F
NDUFS3	0.00226782	0.0225035	-0.352793	0.783066	NADH dehydrogenase (ubiquinone) Fe-S protein 3, 30kDa (NADH-coenzyme Q reductase)	muscle		F
NDUFS8	0.00383688	0.0285901	-0.67395	0.626788	NADH dehydrogenase (ubiquinone) Fe-S protein 8, 23kDa (NADH-coenzyme Q reductase)	muscle		F
NDUFV2	0.000360936	0.0122495	-0.46507	0.724436	NADH dehydrogenase (ubiquinone) flavoprotein 2, 24kDa	muscle		F
NEBL	0.00126898	0.0212316	0.416622	1.3348	nebulette	nervous		F+M
NEK7	0.000822523	0.0167863	0.636828	1.55491	NIMA (never in mitosis gene a)-related kinase 7	nervous		F+M
NENF	0.000875724	0.0287758	0.313768	1.24295	neuron derived neurotrophic factor	muscle		M
NFATC1	0.00186125	0.0205944	0.346856	1.27179	nuclear factor of activated T-cells, cytoplasmic, calcineurin-dependent 1	muscle		F
NFATC2IP	0.0109263	0.0453521	0.308331	1.23827	nuclear factor of activated T-cells, cytoplasmic, calcineurin-dependent 2 interacting protein	muscle	duplicate	F
NFATC2IP	0.00238026	0.0370911	0.568081	1.48255	nuclear factor of activated T-cells, cytoplasmic, calcineurin-dependent 2 interacting protein	muscle	duplicate	M
NFE2L2	0.0023965	0.0370893	0.63345	1.55127	nuclear factor (erythroid-derived 2)-like 2	muscle	duplicate	M
NFE2L2	0.000900784	0.0177338	0.54039	1.45437	nuclear factor (erythroid-derived 2)-like 2	nervous	duplicate	F+M
NFIB	0.000536496	0.0133748	-0.525555	0.694692	nuclear factor I/B	muscle		F
NFIC	0.00192886	0.0357	0.353307	1.27749	nuclear factor I/C (CCAAT-binding transcription factor)	muscle		F
NFKBIA	0.000350615	0.0107628	0.469341	1.38448	nuclear factor of kappa light polypeptide gene enhancer in B-cells inhibitor, alpha	nervous		F+M
NGLY1	0.000116775	0.0652933	0.489996	1.40444	N-glycanase 1	muscle		F+M
NID1	0.000236067	0.0113499	-0.417357	0.748795	nidogen 1	muscle		F
NIPAL3	0.00137126	0.0316107	-0.490174	0.711939	NIPA-like domain containing 3	muscle		F
NIPSNAP3B	0.00730023	0.0377504	-0.552708	0.681739	nipsnap homolog 3B (C. elegans)	muscle		F
NKIRAS2	0.00161519	0.0188531	-0.273585	0.827262	NFKB inhibitor interacting Ras-like 2	muscle		F
NKX6-3	0.00046969	0.081174	-0.377902	0.769556	NK6 homeobox 3	muscle		F+M
NLN	0.000115759	0.0656914	0.426141	1.34364	CDNA FLJ39097 fis, clone NTONG2000977, highly similar to Neurolysin, mitochondrial precursor (EC 3.4.24.16)	muscle		F+M
NMT2	0.000236956	0.0206635	0.68768	1.61069	N-myristoyltransferase 2	muscle		M
NNMT	0.00912419	0.0412647	0.495821	1.41012	nicotinamide N-methyltransferase	muscle	duplicate	F
NNMT	0.000963629	0.0946733	2.52231	5.745	nicotinamide N-methyltransferase	muscle	duplicate	F+M
NNT	0.000155964	0.00964145	-1.03568	0.487787	nicotinamide nucleotide transhydrogenase	muscle		F
NODAL	6.04249e-05	0.0589087	-0.505476	0.704428	nodal homolog (mouse)	muscle		F+M
NOL7	0.00272526	0.0392315	0.337888	1.26391	nucleolar protein 7, 27kDa	muscle		M
NOLC1	0.00210327	0.0217248	0.335621	1.26192	nucleolar and coiled-body phosphoprotein 1	muscle	duplicate	F
NOLC1	0.000402149	0.0784116	0.408103	1.32694	nucleolar and coiled-body phosphoprotein 1	muscle	duplicate	F+M
NOP16	0.00047369	0.0128941	-0.399776	0.757976	NOP16 nucleolar protein homolog (yeast)	muscle		F
NOSIP	0.00410503	0.0446395	0.370687	1.29297	nitric oxide synthase interacting protein	muscle		M
NOTCH2NL	0.00446728	0.0297719	0.712476	1.63861	notch 2 N-terminal like	muscle	duplicate	F
NOTCH2NL	0.00483104	0.0475202	0.701811	1.62655	notch 2 N-terminal like	muscle	duplicate	M
NOX4	0.000122719	0.0639171	1.1862	2.27552	NADPH oxidase 4	muscle		F+M
NPC2	0.00307551	0.0334018	0.602022	1.51784	Niemann-Pick disease, type C2	nervous		F+M
NPCDR1	0.000401539	0.0786963	-0.27756	0.824985	nasopharyngeal carcinoma, down-regulated 1	muscle		F+M
NPM3	0.00195097	0.0210114	-0.406017	0.754704	nucleophosmin/nucleoplasmin 3	muscle		F
NPTX1	0.000415458	0.0793785	-0.51554	0.699531	neuronal pentraxin I	muscle		F+M
NPY6R	0.000224544	0.0308703	-0.950741	0.517367	neuropeptide Y receptor Y6 (pseudogene)	muscle		M
NR1D2	0.000241724	0.00880234	-0.99807	0.500669	nuclear receptor subfamily 1, group D, member 2	nervous		F+M
NRBF2	0.000483933	0.021663	-0.498185	0.707997	nuclear receptor binding factor 2	muscle		F
NRIP1	0.0055624	0.0466377	0.28718	1.22025	nuclear receptor interacting protein 1	nervous		F+M
NRP1	0.00139241	0.0182579	-0.665262	0.630574	neuropilin 1	muscle		F
NRXN1	0.00533639	0.045357	-0.591329	0.663731	neurexin 1	nervous		F+M
NSL1	0.0026332	0.0313479	0.329155	1.25628	NSL1, MIND kinetochore complex component, homolog (S. cerevisiae)	nervous		F+M
NSMCE4A	0.00097106	0.0946694	0.390798	1.31112	non-SMC element 4 homolog A (S. cerevisiae)	muscle		F+M
NSUN4	0.0035817	0.0439049	-0.2705	0.829032	NOP2/Sun domain family, member 4	muscle		F
NT5C2	0.0112273	0.0459869	0.423882	1.34153	5'-nucleotidase, cytosolic II	muscle		F
NUAK1	0.0103937	0.0440469	0.337801	1.26383	NUAK family, SNF1-like kinase, 1	muscle		F
NUCB1	0.0010283	0.0161593	-0.489827	0.712111	nucleobindin 1	muscle		F
NUCKS1	0.00263531	0.0473256	0.496275	1.41057	nuclear casein kinase and cyclin-dependent kinase substrate 1	muscle		M
NUDCD3	0.00280218	0.0389778	0.366365	1.2891	NudC domain containing 3	muscle		M
NUDT4P1	0.00132606	0.0178517	-0.582738	0.667695	nudix (nucleoside diphosphate linked moiety X)-type motif 4 pseudogene 1///nudix (nucleoside diphosphate linked moiety X)-type motif 4	muscle		F
NUDT6	0.00306967	0.0444263	-0.494715	0.709702	nudix (nucleoside diphosphate linked moiety X)-type motif 6	muscle		F
NUFIP2	0.000768174	0.0861566	0.586979	1.5021	nuclear fragile X mental retardation protein interacting protein 2	muscle		F+M
NUP160	0.00400367	0.0447168	0.473947	1.3889	nucleoporin 160kDa	muscle		M
NUP43	0.0072681	0.0377778	0.344709	1.2699	nucleoporin 43kDa	muscle		F
NUP50	0.00285597	0.0388909	0.476815	1.39167	nucleoporin 50kDa	muscle		M
NUPL2	0.00201038	0.0274529	-0.282358	0.822246	nucleoporin like 2	nervous		F+M
NUSAP1	0.00331312	0.0270314	0.316096	1.24496	nucleolar and spindle associated protein 1	muscle		F
NUTF2	0.000108398	0.00610034	-0.701743	0.614829	nuclear transport factor 2	nervous		F+M
NXN	0.00523759	0.0320497	0.343268	1.26863	nucleoredoxin	muscle		F
OBFC1	0.00504349	0.04866	-0.29457	0.815315	oligonucleotide/oligosaccharide-binding fold containing 1	muscle		M
OCIAD1	0.00126282	0.0969984	0.498842	1.41308	OCIA domain containing 1	muscle		F+M
OCIAD2	0.000178192	0.067751	0.343999	1.26927	OCIA domain containing 2	muscle		F+M
OGT	0.0012726	0.0211019	-0.431991	0.741238	O-linked N-acetylglucosamine (GlcNAc) transferase (UDP-N-acetylglucosamine:polypeptide-N-acetylglucosaminyl transferase)	nervous		F+M
OLIG2	0.000547441	0.0119226	0.454689	1.37049	oligodendrocyte lineage transcription factor 2	nervous		F+M
OPA1	0.00630643	0.0352763	-0.314455	0.804155	optic atrophy 1 (autosomal dominant)	muscle		F
OR10H3	0.000452785	0.0815903	-0.41599	0.749505	olfactory receptor, family 10, subfamily H, member 3	muscle		F+M
OR9A1P	0.000433142	0.0811266	-0.519891	0.697424	olfactory receptor, family 9, subfamily A, member 1 pseudogene	muscle		F+M
OSBP	0.000177759	0.00758913	-0.430375	0.742069	oxysterol binding protein	nervous		F+M
OSBPL8	0.00302583	0.0359124	0.68757	1.61057	oxysterol binding protein-like 8	muscle		M
OSTC	0.000153591	0.0173907	-0.294638	0.815277	oligosaccharyltransferase complex subunit	muscle		F
OSTF1	0.00102356	0.0944588	-0.736739	0.600094	osteoclast stimulating factor 1	muscle		F+M
OXR1	0.00319351	0.0440651	-0.317242	0.802603	oxidation resistance 1	muscle		F
OXSM	2.78006e-05	0.00623761	-0.279247	0.824021	3-oxoacyl-ACP synthase, mitochondrial	muscle		F
OXT	0.000538061	0.083162	-0.414122	0.750476	oxytocin, prepropeptide	muscle		F+M
PA2G4	0.00391514	0.0285413	0.323944	1.25175	proliferation-associated 2G4, 38kDa	muscle	duplicate	F
PA2G4	0.000661081	0.0852042	0.570524	1.48506	proliferation-associated 2G4, 38kDa	muscle	duplicate	F+M
PACSIN3	0.00870438	0.040268	0.345956	1.27099	protein kinase C and casein kinase substrate in neurons 3	muscle		F
PAF1	0.00114767	0.0166728	0.357583	1.28128	Paf1, RNA polymerase II associated factor, homolog (S. cerevisiae)	muscle		F
PAK1	0.00138131	0.0996571	-0.985223	0.505148	p21 protein (Cdc42/Rac)-activated kinase 1	muscle	duplicate	F+M
PAK1	2.05329e-05	0.00363169	-1.36292	0.388794	p21 protein (Cdc42/Rac)-activated kinase 1	nervous	duplicate	F+M
PAK2	0.000126059	0.0639057	0.649428	1.56855	p21 protein (Cdc42/Rac)-activated kinase 2	muscle		F+M
PAK3	0.00267397	0.0313311	-0.712977	0.61006	p21 protein (Cdc42/Rac)-activated kinase 3	nervous		F+M
PAK4	0.000730972	0.08422	-0.262367	0.833719	p21 protein (Cdc42/Rac)-activated kinase 4	muscle		F+M
PALLD	0.000457682	0.0126864	0.688077	1.61113	palladin, cytoskeletal associated protein	nervous		F+M
PAM	0.00251478	0.0342576	0.807266	1.74989	peptidylglycine alpha-amidating monooxygenase	muscle		M
PAPOLA	0.00943919	0.0413915	-0.404218	0.755646	poly(A) polymerase alpha	muscle		F
PAPOLG	0.000149384	0.0161285	0.533278	1.44721	poly(A) polymerase gamma	muscle		M
PARM1	8.29233e-05	0.00560006	-0.526599	0.694189	prostate androgen-regulated mucin-like protein 1	nervous		F+M
PARP6	0.00465392	0.0492207	-0.34189	0.789007	poly (ADP-ribose) polymerase family, member 6	muscle		F
PARVB	0.00355924	0.025227	-0.343078	0.788357	parvin, beta	muscle		F
PATL1	0.00142147	0.0318155	-0.46475	0.724597	protein associated with topoisomerase II homolog 1 (yeast)	muscle		F
PAX3	0.000335411	0.078238	-0.261514	0.834212	paired box 3	muscle		F+M
PAX8	0.000945866	0.0925366	-0.69052	0.61963	paired box 8	muscle		F+M
PBXIP1	0.00354686	0.0427755	0.679058	1.60109	pre-B-cell leukemia homeobox interacting protein 1	muscle		M
PCBD1	0.00796885	0.0388688	-0.277395	0.82508	pterin-4 alpha-carbinolamine dehydratase/dimerization cofactor of hepatocyte nuclear factor 1 alpha	muscle		F
PCBP2	0.0027975	0.0214952	-0.311996	0.805527	poly(rC) binding protein 2	muscle		F
PCCA	0.0111085	0.0456858	-0.279079	0.824117	propionyl CoA carboxylase, alpha polypeptide	muscle		F
PCCB	0.00325511	0.0268291	-0.295213	0.814952	propionyl CoA carboxylase, beta polypeptide	muscle		F
PCDH17	0.00489818	0.0311038	-0.268304	0.830295	protocadherin 17	muscle	duplicate	F
PCDH17	0.000893143	0.0289289	-0.601028	0.659284	protocadherin 17	muscle	duplicate	M
PCDHA1	0.000126483	0.0632772	-0.551192	0.682456	protocadherin alpha 1 /// protocadherin alpha 10 /// protocadherin alpha 11 /// protocadherin alpha 12 /// protocadherin alpha 13 /// protocadherin alpha 2 /// protocadherin alpha 3 /// protocadherin alpha 4 /// protocadherin alpha 5 /// protocadherin alp	muscle		F+M
PCDHB5	0.00064793	0.085837	0.503227	1.41738	protocadherin beta 5	muscle		F+M
PCDHGA8	0.000580599	0.0833027	0.50961	1.42367	protocadherin gamma subfamily A, 8	muscle		F+M
PCM1	0.00123149	0.0965422	0.443852	1.36023	pericentriolar material 1	muscle		F+M
PCMT1	0.000139605	0.00682286	-1.18913	0.438568	protein-L-isoaspartate (D-aspartate) O-methyltransferase	nervous		F+M
PCNT	0.00196206	0.034485	0.409861	1.32856	pericentrin	muscle		M
PCTP	0.00666377	0.0363194	-0.391026	0.762587	phosphatidylcholine transfer protein	muscle		F
PDCD2	0.00020917	0.016776	-0.439394	0.737444	programmed cell death 2	muscle		F
PDCD5	0.00107097	0.0163218	-0.360008	0.77916	programmed cell death 5	muscle	duplicate	F
PDCD5	0.000330077	0.0334371	0.512776	1.42679	programmed cell death 5	muscle	duplicate	M
PDE10A	0.000409673	0.0794711	-0.326324	0.797566	phosphodiesterase 10A	muscle		F+M
PDE4B	0.00406967	0.0434165	0.737857	1.6677	phosphodiesterase 4B, cAMP-specific	muscle		M
PDE4D	0.000278283	0.00931199	-0.62678	0.64762	phosphodiesterase 4D, cAMP-specific	nervous		F+M
PDE4DIP	0.0021098	0.0216813	0.305332	1.2357	phosphodiesterase 4D interacting protein	muscle	duplicate	F
PDE4DIP	0.000477521	0.0806935	1.11846	2.17114	phosphodiesterase 4D interacting protein	muscle	duplicate	F+M
PDE4DIP	0.00116017	0.0174838	0.821173	1.76684	phosphodiesterase 4D interacting protein	nervous	duplicate	F+M
PDGFC	0.00915139	0.0412953	0.368953	1.29142	platelet derived growth factor C	muscle		F
PDHA1	0.00302038	0.0237983	-0.354493	0.782144	pyruvate dehydrogenase (lipoamide) alpha 1	muscle		F
PDHB	0.000261222	0.0116344	-0.483602	0.71519	pyruvate dehydrogenase (lipoamide) beta	muscle		F
PDHX	0.00395951	0.0286579	-0.399489	0.758127	pyruvate dehydrogenase complex, component X	muscle		F
PDIA6	0.000146747	0.0162302	0.608206	1.52436	protein disulfide isomerase family A, member 6	muscle		M
PDLIM5	0.00331389	0.0413971	0.371377	1.29359	PDZ and LIM domain 5	muscle	duplicate	M
PDLIM5	0.000977883	0.0168039	0.69795	1.6222	PDZ and LIM domain 5	nervous	duplicate	F+M
PDLIM7	0.000617445	0.0841536	-1.49611	0.354507	PDZ and LIM domain 7 (enigma)	muscle		F+M
PDPR	0.00401237	0.0444852	-0.433625	0.740399	pyruvate dehydrogenase phosphatase regulatory subunit	muscle		M
PDS5B	0.00554841	0.0467314	-0.370129	0.773714	PDS5, regulator of cohesion maintenance, homolog B (S. cerevisiae)	nervous		F+M
PDSS2	0.00496852	0.0482446	0.44303	1.35946	prenyl (decaprenyl) diphosphate synthase, subunit 2	muscle		M
PEA15	0.00392784	0.0285823	-0.43054	0.741984	phosphoprotein enriched in astrocytes 15	muscle		F
PEBP1	0.00501159	0.0314821	0.269051	1.20501	phosphatidylethanolamine binding protein 1	muscle		F
PELO	0.00035955	0.0189613	-0.423986	0.745362	pelota homolog (Drosophila)	muscle		F
PEX1	0.0031967	0.0410645	0.863558	1.81952	peroxisomal biogenesis factor 1	muscle		M
PEX2	0.00228539	0.0225119	-0.395814	0.76006	peroxisomal biogenesis factor 2	muscle		F
PEX3	0.00812858	0.0392216	-0.353971	0.782427	peroxisomal biogenesis factor 3	muscle		F
PEX7	0.00845838	0.0398338	-0.287911	0.819087	peroxisomal biogenesis factor 7	muscle		F
PFKFB2	0.000465217	0.0818898	0.607723	1.52385	6-phosphofructo-2-kinase/fructose-2,6-biphosphatase 2	muscle		F+M
PGF	0.00738737	0.0378617	0.388954	1.30944	placental growth factor	muscle		F
PGK1	0.00388905	0.0287139	-0.612382	0.654116	phosphoglycerate kinase 1	muscle		F
PHB	0.000307046	0.0119236	-0.370534	0.773496	prohibitin	muscle		F
PHC3	0.000528935	0.0384169	0.597299	1.51288	polyhomeotic homolog 3 (Drosophila)	muscle	duplicate	M
PHC3	0.000240155	0.0754629	0.334539	1.26097	polyhomeotic homolog 3 (Drosophila)	muscle	duplicate	F+M
PHF21A	0.00194482	0.027055	-0.272879	0.827666	PHD finger protein 21A	nervous		F+M
PHF3	0.00487534	0.0470238	0.393748	1.3138	PHD finger protein 3	muscle	duplicate	M
PHF3	0.000564174	0.0137863	0.565175	1.47957	PHD finger protein 3	nervous	duplicate	F+M
PHF5A	0.00146876	0.0312395	-0.45994	0.727017	PHD finger protein 5A	muscle		F
PHKA1	0.00111868	0.0165494	-0.522135	0.696341	phosphorylase kinase, alpha 1 (muscle)	muscle		F
PHLPP1	0.0010638	0.0196581	0.397298	1.31704	PH domain and leucine rich repeat protein phosphatase 1	nervous		F+M
PHTF2	0.011007	0.0454071	-0.901318	0.535398	putative homeodomain transcription factor 2	muscle		F
PI16	0.00300314	0.0436276	-0.408674	0.753315	peptidase inhibitor 16	muscle		F
PIAS2	0.00742561	0.0378654	-0.306096	0.808828	protein inhibitor of activated STAT, 2	muscle	duplicate	F
PIAS2	0.00263418	0.0312593	-0.301987	0.811135	protein inhibitor of activated STAT, 2	nervous	duplicate	F+M
PICALM	0.000256147	0.00897556	0.429032	1.34633	phosphatidylinositol binding clathrin assembly protein	nervous		F+M
PIK3C2A	0.00159892	0.0320816	0.660528	1.58066	phosphoinositide-3-kinase, class 2, alpha polypeptide	muscle	duplicate	M
PIK3C2A	0.000120262	0.00647376	0.582522	1.49746	phosphoinositide-3-kinase, class 2, alpha polypeptide	nervous	duplicate	F+M
PIK3CB	0.00420472	0.0397396	-0.445891	0.734131	phosphoinositide-3-kinase, catalytic, beta polypeptide	nervous		F+M
PIK3R1	0.00148876	0.0185574	0.427338	1.34475	phosphoinositide-3-kinase, regulatory subunit 1 (alpha)	muscle	duplicate	F
PIK3R1	0.0016391	0.0321759	0.686348	1.60921	phosphoinositide-3-kinase, regulatory subunit 1 (alpha)	muscle	duplicate	M
PIKFYVE	0.00510794	0.044432	0.285614	1.21893	phosphoinositide kinase, FYVE finger containing	nervous		F+M
PILRB	4.74861e-05	0.0121873	0.679852	1.60198	paired immunoglobin-like type 2 receptor beta	muscle	duplicate	F
PILRB	0.00166082	0.0321843	0.665541	1.58616	paired immunoglobin-like type 2 receptor beta	muscle	duplicate	M
PIP4K2A	0.000700866	0.0157772	0.696632	1.62072	phosphatidylinositol-5-phosphate 4-kinase, type II, alpha	nervous		F+M
PIP5K1C	0.00363891	0.0278867	-0.284422	0.821071	phosphatidylinositol-4-phosphate 5-kinase, type I, gamma	muscle		F
PITPNA	0.00248638	0.0305801	-0.460604	0.726682	phosphatidylinositol transfer protein, alpha	nervous		F+M
PITPNB	6.72173e-05	0.00520138	-0.649397	0.637547	phosphatidylinositol transfer protein, beta	nervous		F+M
PKIA	0.000444333	0.012727	-0.280026	0.823576	protein kinase (cAMP-dependent, catalytic) inhibitor alpha	muscle		F
PKIB	0.00103413	0.0947448	0.579161	1.49398	protein kinase (cAMP-dependent, catalytic) inhibitor beta	muscle		F+M
PKIG	0.00248817	0.0373605	0.534109	1.44805	protein kinase (cAMP-dependent, catalytic) inhibitor gamma	muscle		M
PL-5283	1.28086e-06	0.00246548	-0.492504	0.71079	PL-5283 protein	muscle	duplicate	F
PL-5283	0.000631529	0.0854507	-0.518517	0.698089	PL-5283 protein	muscle	duplicate	F+M
PLA1A	4.87583e-05	0.0579331	1.29032	2.44581	phospholipase A1 member A	muscle		F+M
PLA2G4C	0.000748306	0.0150356	0.305376	1.23574	phospholipase A2, group IVC (cytosolic, calcium-independent)	muscle		F
PLAC4	0.000121852	0.0643468	-0.547462	0.684223	placenta-specific 4	muscle		F+M
PLAG1	1.17356e-05	0.0557754	1.36731	2.57989	pleiomorphic adenoma gene 1	muscle		F+M
PLAT	0.00385359	0.0444643	0.490885	1.40531	plasminogen activator, tissue	muscle		M
PLCL1	0.00613658	0.0349556	-0.477853	0.718046	phospholipase C-like 1	muscle		F
PLCL2	0.000277339	0.00945069	-0.403633	0.755952	phospholipase C-like 2	nervous		F+M
PLCXD2	0.000981677	0.094017	0.569273	1.48378	phosphatidylinositol-specific phospholipase C, X domain containing 2	muscle		F+M
PLD6	0.000240158	0.0748453	-0.511375	0.701553	phospholipase D family, member 6	muscle		F+M
PLEKHA8	0.00314072	0.043967	0.296825	1.22844	pleckstrin homology domain containing, family A (phosphoinositide binding specific) member 8	muscle		F
PLEKHB2	0.00102193	0.0196671	-0.701005	0.615144	pleckstrin homology domain containing, family B (evectins) member 2	nervous		F+M
PLEKHF2	0.00408418	0.0469344	-0.59214	0.663358	pleckstrin homology domain containing, family F (with FYVE domain) member 2	muscle		F
PLIN5	0.00319251	0.0442097	0.488213	1.40271	perilipin 5	muscle		F
PLN	0.00624737	0.0351406	-0.573934	0.671783	phospholamban	muscle		F
PLOD2	0.00102725	0.0196677	0.869715	1.8273	procollagen-lysine, 2-oxoglutarate 5-dioxygenase 2	nervous		F+M
PLS3	0.00243645	0.0303683	0.312477	1.24184	plastin 3	nervous		F+M
PLXDC1	0.00595615	0.0344132	-0.301133	0.811615	plexin domain containing 1	muscle		F
PLXNC1	0.00483661	0.0429777	0.394362	1.31436	plexin C1	nervous		F+M
PM20D2	3.3866e-05	0.014485	0.650569	1.56979	peptidase M20 domain containing 2	muscle		M
PMP22	0.00440384	0.0295441	0.372155	1.29428	peripheral myelin protein 22	muscle	duplicate	F
PMP22	0.00327606	0.0412656	0.671088	1.59227	peripheral myelin protein 22	muscle	duplicate	M
PMP22	0.000405156	0.0117568	0.549259	1.46333	peripheral myelin protein 22	nervous	duplicate	F+M
PNN	0.000141354	0.00984277	-0.403194	0.756182	pinin, desmosome associated protein	muscle	duplicate	F
PNN	0.00046995	0.0808514	0.737079	1.6668	pinin, desmosome associated protein	muscle	duplicate	F+M
PNO1	0.000149194	0.0102126	-0.303377	0.810353	partner of NOB1 homolog (S. cerevisiae)	muscle		F
PNPT1	0.00027669	0.0183652	-0.373724	0.771788	polyribonucleotide nucleotidyltransferase 1	muscle		F
PODXL	0.000149473	0.00721024	0.46799	1.38318	podocalyxin-like	nervous		F+M
POLDIP2	0.000959324	0.0297834	-0.419497	0.747685	polymerase (DNA-directed), delta interacting protein 2	muscle		F
POLR2J	0.000576094	0.0139856	0.349356	1.27399	polymerase (RNA) II (DNA directed) polypeptide J, 13.3kDa	nervous		F+M
POLR2J3	0.004474	0.0297676	-0.296199	0.814395	polymerase (RNA) II (DNA directed) polypeptide J3///polymerase (RNA) II (DNA directed) polypeptide J2///polymerase (RNA) II (DNA directed) polypeptide J4, pseudogene	muscle		F
POLR2K	0.00177405	0.0176756	-0.312463	0.805266	polymerase (RNA) II (DNA directed) polypeptide K, 7.0kDa	muscle	duplicate	F
POLR2K	0.00150444	0.0318787	0.400823	1.32026	polymerase (RNA) II (DNA directed) polypeptide K, 7.0kDa	muscle	duplicate	M
POLR3C	0.000272465	0.020592	0.604201	1.52014	polymerase (RNA) III (DNA directed) polypeptide C (62kD)	muscle		M
PON2	0.000376117	0.0112663	0.47338	1.38836	paraoxonase 2	nervous		F+M
PPA1	0.000631946	0.0140231	-0.349338	0.784944	pyrophosphatase (inorganic) 1	muscle		F
PPAP2A	0.000758588	0.0159188	0.403922	1.3231	phosphatidic acid phosphatase type 2A	nervous		F+M
PPFIA1	0.00104353	0.030529	0.49819	1.41244	protein tyrosine phosphatase, receptor type, f polypeptide (PTPRF), interacting protein (liprin), alpha 1	muscle		M
PPIA	0.000320621	0.0264202	0.681467	1.60377	peptidylprolyl isomerase A (cyclophilin A)	muscle		M
PPIC	0.00490764	0.0276526	-0.276101	0.82582	peptidylprolyl isomerase C (cyclophilin C)	muscle		F
PPIE	0.000492167	0.0128737	-0.309927	0.806683	peptidylprolyl isomerase E (cyclophilin E)	nervous		F+M
PPIF	0.000380735	0.012002	-0.64167	0.640971	peptidylprolyl isomerase F	muscle		F
PPM1B	0.00328883	0.0411976	0.598417	1.51405	protein phosphatase, Mg2+/Mn2+ dependent, 1B	muscle		M
PPM1E	0.000959075	0.0188482	-0.480002	0.716977	protein phosphatase, Mg2+/Mn2+ dependent, 1E	nervous		F+M
PPP1R2	0.00127654	0.0970718	-0.451825	0.731117	Inhibitor 2 gene	muscle		F+M
PPP1R9A	0.00546329	0.032981	0.374811	1.29667	protein phosphatase 1, regulatory (inhibitor) subunit 9A	muscle		F
PPP1R9B	0.000534149	0.083234	-0.481386	0.716289	protein phosphatase 1, regulatory (inhibitor) subunit 9B	muscle		F+M
PPP2R5D	0.00138836	0.0182642	-0.37203	0.772694	protein phosphatase 2, regulatory subunit B', delta	muscle		F
PPP4R1	0.00268986	0.0390943	0.366593	1.2893	protein phosphatase 4, regulatory subunit 1	muscle		M
PPP6C	0.0104045	0.0440462	-0.469214	0.722358	protein phosphatase 6, catalytic subunit	muscle		F
PQBP1	0.00114193	0.0306402	0.27478	1.20981	polyglutamine binding protein 1	muscle		M
PRDX2	0.000186451	0.0110737	-0.359095	0.779653	peroxiredoxin 2	muscle		F
PRDX6	0.00432134	0.0407622	0.378283	1.29979	peroxiredoxin 6	muscle	duplicate	M
PRDX6	3.25324e-05	0.00431555	0.51506	1.42905	peroxiredoxin 6	nervous	duplicate	F+M
PREPL	0.00559728	0.0333907	-0.399835	0.757945	prolyl endopeptidase-like	muscle		F
PRKAG1	0.0101861	0.0434866	-0.378301	0.769343	protein kinase, AMP-activated, gamma 1 non-catalytic subunit	muscle		F
PRKAG3	0.000143104	0.066354	-1.23908	0.423642	protein kinase, AMP-activated, gamma 3 non-catalytic subunit	muscle		F+M
PRKAR2B	0.000869532	0.0910767	1.69378	3.23503	protein kinase, cAMP-dependent, regulatory, type II, beta	muscle		F+M
PRKCB	0.00508601	0.0379278	-1.11601	0.461367	protein kinase C, beta	nervous		F+M
PRKCD	0.000355499	0.0108232	-0.41421	0.75043	protein kinase C, delta	nervous		F+M
PRKCH	0.00923098	0.0414006	-0.32643	0.797508	protein kinase C, eta	muscle		F
PRKCZ	0.00161277	0.0245506	-0.59451	0.66227	protein kinase C, zeta	nervous		F+M
PRKDC	0.00325739	0.0345685	-0.365326	0.776293	protein kinase, DNA-activated, catalytic polypeptide	nervous		F+M
PRKRA	0.01101	0.0453731	-0.306605	0.808542	protein kinase, interferon-inducible double stranded RNA dependent activator	muscle		F
PRNP	0.00427775	0.0292819	0.463592	1.37897	prion protein	muscle		F
PRO2964	0.000519408	0.082286	-0.588314	0.66512	hypothetical protein PRO2964	muscle		F+M
PRODH	0.00117803	0.0961163	0.753005	1.6853	proline dehydrogenase (oxidase) 1	muscle		F+M
PRPF31	0.00438289	0.0461128	0.332605	1.25929	PRP31 pre-mRNA processing factor 31 homolog (S. cerevisiae)	muscle		M
PRPF40A	0.000966877	0.0294255	0.713751	1.64006	PRP40 pre-mRNA processing factor 40 homolog A (S. cerevisiae)	muscle		M
PRPF4B	0.00376581	0.0413657	0.344879	1.27004	PRP4 pre-mRNA processing factor 4 homolog B (yeast)	muscle		M
PRPSAP1	0.00087664	0.0910685	-0.285295	0.820574	phosphoribosyl pyrophosphate synthetase-associated protein 1	muscle		F+M
PRRT3	0.000477927	0.0804047	-0.39613	0.759894	proline-rich transmembrane protein 3	muscle		F+M
PRSS23	0.00121916	0.0963701	-0.583917	0.66715	CDNA PSEC0048 fis, clone NT2RP2000028, highly similar to Serine protease 23 precursor (EC 3.4.21.-)	muscle		F+M
PSENEN	0.0026402	0.0243444	-0.403781	0.755875	presenilin enhancer 2 homolog (C. elegans)	muscle		F
PSG1	0.00539846	0.0494542	-0.560045	0.678281	pregnancy specific beta-1-glycoprotein 1	muscle		M
PSIP1	0.000693329	0.0158966	0.279679	1.21393	PC4 and SFRS1 interacting protein 1	nervous		F+M
psiTPTE22	0.000862726	0.0454932	-0.369094	0.774269	TPTE pseudogene	muscle		M
PSMA8	0.000268086	0.0749485	0.834405	1.78312	proteasome (prosome, macropain) subunit, alpha type, 8	muscle		F+M
PSMB1	0.00146154	0.0185617	0.364985	1.28787	proteasome (prosome, macropain) subunit, beta type, 1	muscle		F
PSMB4	0.000930354	0.0292971	0.310144	1.23983	proteasome (prosome, macropain) subunit, beta type, 4	muscle		M
PSMC6	0.00106135	0.0306549	0.473021	1.38801	proteasome (prosome, macropain) 26S subunit, ATPase, 6	muscle		M
PSMD8	0.00449497	0.0413261	-0.378791	0.769082	proteasome (prosome, macropain) 26S subunit, non-ATPase, 8	nervous		F+M
PSME4	0.00244084	0.0231946	-0.39733	0.759262	proteasome (prosome, macropain) activator subunit 4	muscle		F
PSMF1	0.000567693	0.0138952	-0.381922	0.767414	proteasome (prosome, macropain) inhibitor subunit 1 (PI31)	muscle		F
PTBP1	0.000658716	0.0266697	0.31377	1.24295	polypyrimidine tract binding protein 1	muscle		M
PTCH1	0.00202447	0.0351731	0.566363	1.48079	patched 1	muscle		M
PTGDS	0.000231591	0.0736154	-1.43561	0.369691	prostaglandin D2 synthase 21kDa (brain)	muscle		F+M
PTGES2	0.0044791	0.0467993	-0.493398	0.71035	prostaglandin E synthase 2	muscle		M
PTGES3	0.00389732	0.0445158	0.426751	1.3442	prostaglandin E synthase 3 (cytosolic)	muscle		M
PTGR1	0.00034978	0.0195096	-0.551449	0.682334	prostaglandin reductase 1	muscle		F
PTK2	0.00103464	0.0161959	-0.566454	0.675274	PTK2 protein tyrosine kinase 2	muscle		F
PTK2B	0.000646052	0.0858875	-0.298657	0.813009	PTK2B protein tyrosine kinase 2 beta	muscle		F+M
PTMA	0.00840317	0.0396406	0.41447	1.33281	prothymosin, alpha	muscle		F
PTP4A1	0.00588618	0.0341555	-0.705917	0.613053	protein tyrosine phosphatase type IVA, member 1	muscle		F
PTP4A2	0.00266864	0.0314672	0.474875	1.3898	protein tyrosine phosphatase type IVA, member 2	nervous		F+M
PTPLA	0.00342136	0.0272002	-0.444966	0.734602	protein tyrosine phosphatase-like (proline instead of catalytic arginine), member A	muscle		F
PTPN11	0.000849907	0.0153923	-0.631143	0.645665	protein tyrosine phosphatase, non-receptor type 11	muscle		F
PTPN3	0.00284306	0.0249611	-0.358085	0.780199	protein tyrosine phosphatase, non-receptor type 3	muscle		F
PTPRD	0.0047109	0.0424703	-0.350924	0.784081	protein tyrosine phosphatase, receptor type, D	nervous		F+M
PTPRO	0.0128699	0.0493607	-0.516523	0.699054	protein tyrosine phosphatase, receptor type, O	muscle		F
PTPRR	0.00579524	0.047728	-0.330783	0.795105	protein tyrosine phosphatase, receptor type, R	nervous		F+M
PTPRT	0.00174115	0.0254614	0.326595	1.25405	protein tyrosine phosphatase, receptor type, T	nervous		F+M
PTS	0.000273876	0.0118934	-0.387406	0.764503	6-pyruvoyltetrahydropterin synthase	muscle		F
PTTG1IP	0.00164516	0.0248401	0.429992	1.34723	pituitary tumor-transforming 1 interacting protein	nervous		F+M
PUM2	0.00204051	0.0347129	0.384414	1.30533	pumilio homolog 2 (Drosophila)	muscle		M
PVRL3	0.000747904	0.015874	-0.637212	0.642954	poliovirus receptor-related 3	nervous		F+M
PYROXD1	0.00555031	0.0498384	0.339043	1.26492	pyridine nucleotide-disulphide oxidoreductase domain 1	muscle		M
QKI	0.0033317	0.0346638	0.454865	1.37065	quaking homolog, KH domain RNA binding (mouse)	nervous		F+M
QRSL1	0.00664605	0.0362717	-0.325382	0.798087	glutaminyl-tRNA synthase (glutamine-hydrolyzing)-like 1	muscle		F
RAB10	0.00041328	0.0353532	0.371202	1.29343	RAB10, member RAS oncogene family	muscle		M
RAB11FIP2	0.00325632	0.0413616	0.263514	1.2004	RAB11 family interacting protein 2 (class I)	muscle		M
RAB18	0.00524238	0.0497568	-0.48476	0.714616	RAB18, member RAS oncogene family	muscle		F
RAB1A	0.00579316	0.0308892	-0.360635	0.778822	RAB1A, member RAS oncogene family	muscle	duplicate	F
RAB1A	0.00215619	0.0288085	-0.549939	0.683049	RAB1A, member RAS oncogene family	nervous	duplicate	F+M
RAB3GAP1	0.00845507	0.0397985	0.265349	1.20193	RAB3 GTPase activating protein subunit 1 (catalytic)	muscle		F
RAB4A	0.000479518	0.0126008	-0.396176	0.75987	RAB4A, member RAS oncogene family	muscle		F
RAB5A	0.0114442	0.0463117	-0.490647	0.711706	RAB5A, member RAS oncogene family	muscle	duplicate	F
RAB5A	0.00224702	0.0291823	-0.672972	0.627213	RAB5A, member RAS oncogene family	nervous	duplicate	F+M
RAB6A	0.000104323	0.00605451	-1.15041	0.450496	RAB6A, member RAS oncogene family	nervous		F+M
RAB7A	0.00478978	0.030803	-0.515362	0.699618	RAB7A, member RAS oncogene family	muscle		F
RAD23A	0.00126998	0.0211529	-0.374441	0.771404	RAD23 homolog A (S. cerevisiae)	nervous		F+M
RAF1	9.40421e-05	0.0616485	0.556132	1.47032	Raf oncogene	muscle		F+M
RALGAPA1	1.5442e-05	0.0116705	0.699475	1.62391	Ral GTPase activating protein, alpha subunit 1 (catalytic)	muscle		M
RAMP1	8.83447e-05	0.00565759	0.618733	1.53553	receptor (G protein-coupled) activity modifying protein 1	nervous		F+M
RAN	0.00404263	0.0363477	-0.578398	0.669707	RAN, member RAS oncogene family	nervous		F+M
RAP1A	0.00230684	0.0297512	0.328295	1.25553	RAP1A, member of RAS oncogene family	nervous		F+M
RAP1B	6.48167e-05	0.00534999	0.497512	1.41178	RAP1B, member of RAS oncogene family	nervous		F+M
RAP1BL	0.00122661	0.0295862	0.45491	1.3707	RAP1B, member of RAS oncogene family pseudogene///RAP1B, member of RAS oncogene family	muscle		M
RAP2A	0.000333474	0.0104086	-1.32505	0.399135	RAP2A, member of RAS oncogene family	nervous		F+M
RAPGEF2	0.00463112	0.0472979	0.3914	1.31167	Rap guanine nucleotide exchange factor (GEF) 2	muscle		M
RARS2	0.000117401	0.0646918	0.388121	1.30869	arginyl-tRNA synthetase 2, mitochondrial	muscle		F+M
RASEF	0.000456561	0.0810235	1.03592	2.05042	RAS and EF-hand domain containing	muscle		F+M
RASSF2	4.32956e-05	0.00502542	0.687416	1.6104	Ras association (RalGDS/AF-6) domain family member 2	nervous		F+M
RASSF6	0.00052569	0.0825929	-0.585305	0.666508	Ras association (RalGDS/AF-6) domain family member 6	muscle		F+M
RASSF8	0.00190098	0.0355255	-0.407929	0.753705	Ras association (RalGDS/AF-6) domain family (N-terminal) member 8	muscle		F
RBBP4	0.00102951	0.0196098	-0.591505	0.66365	retinoblastoma binding protein 4	nervous		F+M
RBBP7	0.000785539	0.0296842	0.2756	1.2105	retinoblastoma binding protein 7	muscle		M
RBL2	0.00352307	0.035367	0.463948	1.37931	retinoblastoma-like 2 (p130)	nervous		F+M
RBM	0.000253119	0.0751869	-0.489284	0.712378	similar to RNA binding motif protein, Y chromosome, family 2 member B /// RNA binding motif protein, Y-linked, family 1, member A1 /// RNA binding motif protein, Y-linked, family 1, member B /// RNA binding motif protein, Y-linked, family 1, member D ///	muscle		F+M
RBM15	0.00278456	0.0249909	0.348771	1.27348	RNA binding motif protein 15	muscle	duplicate	F
RBM15	0.00091794	0.0928228	0.49633	1.41062	CDNA FLJ33960 fis, clone CTONG2018843	muscle	duplicate	F+M
RBM18	0.00118801	0.0296983	-0.272508	0.827879	RNA binding motif protein 18	muscle		F
RBM22	0.00107841	0.0301861	0.586913	1.50203	RNA binding motif protein 22	muscle		M
RBM26	0.00123784	0.0296989	0.500009	1.41422	RNA binding motif protein 26	muscle		M
RBM3	0.00115763	0.0305197	0.809679	1.75282	RNA binding motif (RNP1, RRM) protein 3	muscle		M
RBM39	0.00478732	0.0475028	0.386819	1.30751	RNA binding motif protein 39	muscle		M
RBM8A	0.00189521	0.0207992	0.314649	1.24371	RNA binding motif protein 8A	muscle	duplicate	F
RBM8A	0.00491202	0.0455992	0.50379	1.41793	RNA binding motif protein 8A	muscle	duplicate	M
RBMX	0.00496711	0.0483344	0.437353	1.35412	RNA binding motif protein, X-linked	muscle		M
RBP4	0.000950526	0.0189815	-0.52227	0.696276	retinol binding protein 4, plasma	nervous		F+M
RCOR3	0.00041387	0.0794744	0.526249	1.44018	REST corepressor 3	muscle		F+M
RDX	0.00125033	0.0298407	0.414684	1.33301	radixin	muscle	duplicate	M
RDX	1.91827e-06	0.00178126	0.64221	1.56072	radixin	nervous	duplicate	F+M
REEP5	0.00397226	0.0286474	-0.465195	0.724373	receptor accessory protein 5	muscle		F
RELT	0.000677408	0.0850034	-0.330359	0.795339	RELT tumor necrosis factor receptor	muscle		F+M
REPS2	0.000185032	0.0165657	-0.374201	0.771533	RALBP1 associated Eps domain containing 2	muscle		F
RET	0.0123841	0.0482772	-0.475216	0.719359	ret proto-oncogene	muscle	duplicate	F
RET	1.99315e-06	0.0757824	-0.84219	0.557796	ret proto-oncogene	muscle	duplicate	F+M
REV1	0.000219231	0.0207109	0.491055	1.40547	REV1 homolog (S. cerevisiae)	muscle		M
RFC5	0.00793239	0.0388317	0.268	1.20414	replication factor C (activator 1) 5, 36.5kDa	muscle		F
RFK	0.00265064	0.0242744	-0.263723	0.832936	riboflavin kinase	muscle		F
RGN	0.00109395	0.0197247	0.440657	1.35722	regucalcin (senescence marker protein-30)	nervous		F+M
RGPD6	0.000842412	0.0154646	0.264368	1.20111	RANBP2-like and GRIP domain containing 6///RANBP2-like and GRIP domain containing 8///RANBP2-like and GRIP domain containing 4///RANBP2-like and GRIP domain containing 5	muscle	duplicate	F
RGPD6	0.00157997	0.0322726	0.463946	1.37931	RANBP2-like and GRIP domain containing 6///RANBP2-like and GRIP domain containing 8///RANBP2-like and GRIP domain containing 5	muscle	duplicate	M
RGS16	0.00127993	0.0300451	-0.500651	0.706788	regulator of G-protein signaling 16	muscle		F
RGS20	0.00517044	0.044662	0.768938	1.70402	regulator of G-protein signaling 20	nervous		F+M
RGS3	0.00400801	0.0286495	-0.64306	0.640353	regulator of G-protein signaling 3	muscle		F
RHOBTB3	0.00308889	0.0258272	0.918569	1.89024	Rho-related BTB domain containing 3	nervous		F+M
RHOC	0.00498244	0.0438539	0.353584	1.27773	ras homolog gene family, member C	nervous		F+M
RHOQ	0.0010173	0.0163037	-0.279983	0.823601	ras homolog gene family, member Q	muscle		F
RICTOR	0.000154502	0.0237898	0.398684	1.3183	RPTOR independent companion of MTOR, complex 2	muscle		M
RIF1	0.0033938	0.0418193	0.549169	1.46324	RAP1 interacting factor homolog (yeast)	muscle		M
RIMKLA	0.00307933	0.0443993	-0.476219	0.718859	ribosomal modification protein rimK-like family member A	muscle		F
RIN2	4.32047e-05	0.00517664	0.614963	1.53152	Ras and Rab interactor 2	nervous		F+M
RIPK4	0.000469267	0.0814712	-0.334528	0.793044	receptor-interacting serine-threonine kinase 4	muscle		F+M
RIT1	0.0016957	0.034178	-0.291173	0.817238	Ras-like without CAAX 1	muscle		F
RNASE1	0.00289402	0.0322802	0.51754	1.43151	ribonuclease, RNase A family, 1 (pancreatic)	nervous		F+M
RNASE4	8.42779e-05	0.0166159	0.813876	1.75793	ribonuclease, RNase A family, 4	muscle		M
RNASEH2B	0.00521733	0.0492885	0.338564	1.2645	ribonuclease H2, subunit B	muscle		M
RNF10	0.000520737	0.0131442	-0.275795	0.825995	ring finger protein 10	muscle		F
RNF103	6.62076e-05	0.0150112	0.700519	1.62509	ring finger protein 103	muscle		M
RNF123	0.00351434	0.0275062	-0.358405	0.780026	ring finger protein 123	muscle		F
RNF13	1.12919e-05	0.0613335	-1.44561	0.367138	ring finger protein 13	muscle		F+M
RNF130	0.011745	0.0468253	-0.384724	0.765925	ring finger protein 130	muscle		F
RNF138	0.00168924	0.0324577	0.508691	1.42276	ring finger protein 138	muscle		M
RNF14	0.000317166	0.0119713	-0.569324	0.673932	ring finger protein 14	muscle		F
RNF141	0.00222227	0.0223258	-0.328471	0.79638	ring finger protein 141	muscle		F
RNF19B	0.000869379	0.0175497	-0.48585	0.714076	ring finger protein 19B	nervous		F+M
RNF5	1.78487e-05	0.00514891	-0.493366	0.710366	ring finger protein 5	muscle		F
RNGTT	0.000461815	0.0126878	-0.292105	0.816709	RNA guanylyltransferase and 5'-phosphatase	muscle		F
RNLS	0.00378224	0.0453601	-0.281977	0.822463	renalase, FAD-dependent amine oxidase	muscle		F
RP11-345P4.4	0.000458602	0.0814798	0.515965	1.42995	similar to solute carrier family 35, member E2 /// solute carrier family 35, member E2	muscle		F+M
RPL15	0.000823505	0.029637	0.345702	1.27077	ribosomal protein L15	muscle		M
RPL3	0.00208331	0.0209548	0.286765	1.2199	ribosomal protein L3	muscle		F
RPL31	0.00879355	0.040634	-0.334735	0.79293	ribosomal protein L31	muscle		F
RPL37	9.01466e-05	0.0612054	0.599584	1.51528	Ribosomal protein L37, mRNA (cDNA clone IMAGE:6671394)	muscle		F+M
RPL3P7	0.000364073	0.0223098	0.404439	1.32357	ribosomal protein L3 pseudogene 7	muscle		M
RPRD1A	0.00915327	0.0412577	-0.526293	0.694337	regulation of nuclear pre-mRNA domain containing 1A	muscle		F
RPS27L	0.00237459	0.0229979	0.282934	1.21667	ribosomal protein S27-like	muscle		F
RPS6KA3	0.00191833	0.0267868	-0.393113	0.761485	ribosomal protein S6 kinase, 90kDa, polypeptide 3	nervous		F+M
RPS6KA5	0.000174294	0.0669383	0.946546	1.92725	ribosomal protein S6 kinase, 90kDa, polypeptide 5	muscle		F+M
RRAS2	0.00255195	0.0218774	-0.416499	0.749241	related RAS viral (r-ras) oncogene homolog 2	muscle		F
RRP1B	0.000222499	0.0205907	0.57223	1.48682	ribosomal RNA processing 1 homolog B (S. cerevisiae)	muscle		M
RSRC2	0.00209217	0.0359362	0.372832	1.29489	arginine/serine-rich coiled-coil 2	muscle		M
RTCD1	0.00179529	0.0203097	-0.362711	0.777702	RNA terminal phosphate cyclase domain 1	muscle	duplicate	F
RTCD1	0.00198949	0.0272679	-0.353358	0.78276	RNA terminal phosphate cyclase domain 1	nervous	duplicate	F+M
RTF1	0.00390237	0.0443501	0.297373	1.22891	Rtf1, Paf1/RNA polymerase II complex component, homolog (S. cerevisiae)	muscle		M
RTN4RL2	0.000873472	0.091238	-0.287174	0.819505	reticulon 4 receptor-like 2	muscle		F+M
RTP3	0.00079488	0.0873482	-0.367361	0.775199	receptor (chemosensory) transporter protein 3	muscle		F+M
RUFY3	0.00607826	0.0490795	0.264422	1.20115	RUN and FYVE domain containing 3	nervous		F+M
RXRG	0.000199089	0.0116529	-0.309027	0.807186	retinoid X receptor, gamma	muscle		F
RYBP	0.000492903	0.0248346	0.610035	1.5263	RING1 and YY1 binding protein	muscle	duplicate	M
RYBP	0.00339473	0.0347358	0.31874	1.24724	RING1 and YY1 binding protein	nervous	duplicate	F+M
RYK	0.00124973	0.0173392	-0.325502	0.798021	RYK receptor-like tyrosine kinase	muscle		F
S100A12	0.00899084	0.0410292	-0.299341	0.812623	S100 calcium binding protein A12	muscle		F
S100B	0.000247507	0.00892542	0.483854	1.39847	S100 calcium binding protein B	nervous		F+M
S1PR1	0.00538449	0.0456614	0.876704	1.83618	sphingosine-1-phosphate receptor 1	nervous		F+M
SACS	0.00447541	0.0469773	0.539906	1.45388	spastic ataxia of Charlevoix-Saguenay (sacsin)	muscle		M
SAP130	0.00553611	0.0333211	-0.264904	0.832254	Sin3A-associated protein, 130kDa	muscle		F
SAR1A	0.00150691	0.0317826	0.498741	1.41298	SAR1 homolog A (S. cerevisiae)	muscle		M
SART3	0.000539708	0.0134957	0.337647	1.26369	squamous cell carcinoma antigen recognized by T cells 3	muscle	duplicate	F
SART3	0.000698	0.0433372	0.447609	1.36378	squamous cell carcinoma antigen recognized by T cells 3	muscle	duplicate	M
SCAMP1	0.00236092	0.0370443	0.305511	1.23586	secretory carrier membrane protein 1	muscle		M
SCAMP5	0.00481919	0.0430288	-0.684989	0.622011	secretory carrier membrane protein 5	nervous		F+M
SCAPER	0.000532432	0.0248903	0.405418	1.32447	S-phase cyclin A-associated protein in the ER	muscle		M
SCARNA17	2.7815e-05	0.0118978	-0.404029	0.755745	small Cajal body-specific RNA 17	muscle		F
SCOC	0.00207791	0.0365269	-0.901064	0.535492	short coiled-coil protein	muscle		F
SCP2	0.00305741	0.0261606	-0.412393	0.751376	sterol carrier protein 2	muscle	duplicate	F
SCP2	8.93449e-05	0.00562466	0.490145	1.40459	sterol carrier protein 2	nervous	duplicate	F+M
SCRN3	0.00868861	0.0402411	-0.641543	0.641027	secernin 3	muscle		F
SCYL2	4.87987e-05	0.0117414	-0.448875	0.732614	SCY1-like 2 (S. cerevisiae)	muscle		F
SDHB	7.34521e-05	0.00872492	-0.362373	0.777884	succinate dehydrogenase complex, subunit B, iron sulfur (Ip)	muscle		F
SDHC	0.00363091	0.0449454	-0.408099	0.753616	succinate dehydrogenase complex, subunit C, integral membrane protein, 15kDa	muscle		F
SDPR	0.00707727	0.0373141	-0.396705	0.759591	serum deprivation response	muscle		F
SEC11A	0.000605338	0.0145059	0.331561	1.25837	SEC11 homolog A (S. cerevisiae)	nervous		F+M
SEC16A	0.00103733	0.0161131	0.277629	1.2122	SEC16 homolog A (S. cerevisiae)	muscle		F
SEC23A	0.00376342	0.043646	0.517513	1.43149	Sec23 homolog A (S. cerevisiae)	muscle		M
SEC23IP	0.00553238	0.049776	0.401752	1.32111	SEC23 interacting protein	muscle		M
SEC31B	0.000301932	0.0123171	-0.371791	0.772823	SEC31 homolog B (S. cerevisiae)///NADH dehydrogenase (ubiquinone) 1 beta subcomplex, 8, 19kDa	muscle		F
SEC63	5.3916e-05	0.0152804	0.541329	1.45531	SEC63 homolog (S. cerevisiae)	muscle		M
SELENBP1	0.0056444	0.046797	0.302912	1.23363	selenium binding protein 1	nervous		F+M
SEMA3C	0.00254495	0.0229046	-0.499666	0.70727	sema domain, immunoglobulin domain (Ig), short basic domain, secreted, (semaphorin) 3C	muscle		F
SEMA4F	0.00847114	0.0397352	-0.345681	0.786937	sema domain, immunoglobulin domain (Ig), transmembrane domain (TM) and short cytoplasmic domain, (semaphorin) 4F	muscle		F
SEMA6A	0.00279088	0.0419694	-0.366733	0.775537	sema domain, transmembrane domain (TM), and cytoplasmic domain, (semaphorin) 6A	muscle		F
SENP2	0.00154625	0.018641	-0.370574	0.773475	SUMO1/sentrin/SMT3 specific peptidase 2	muscle		F
SENP5	9.64481e-05	0.0145784	-0.357414	0.780563	SUMO1/sentrin specific peptidase 5	muscle		M
SEPP1	0.000508204	0.0240052	0.73685	1.66653	selenoprotein P, plasma, 1	muscle	duplicate	M
SEPP1	0.000424944	0.0119574	0.632364	1.5501	selenoprotein P, plasma, 1	nervous	duplicate	F+M
SEPT10	0.00268407	0.0311546	0.657963	1.57785	septin 10	nervous		F+M
SEPT2	0.00360219	0.0357745	0.395355	1.31527	septin 2	nervous		F+M
SEPT4	0.00328624	0.0344806	0.571209	1.48577	septin 4	nervous		F+M
SERBP1	0.0130489	0.0499051	-0.38517	0.765689	SERPINE1 mRNA binding protein 1	muscle		F
SERF2	3.98721e-06	0.00511657	-0.495298	0.709415	small EDRK-rich factor 2	muscle		F
SERINC3	0.000339195	0.0222915	0.438764	1.35544	serine incorporator 3	muscle		M
SERINC5	0.00889559	0.0407789	-0.649023	0.637712	serine incorporator 5	muscle	duplicate	F
SERINC5	0.000228765	0.00858288	0.80406	1.74601	serine incorporator 5	nervous	duplicate	F+M
SERP1	0.00338859	0.0348651	0.297191	1.22875	stress-associated endoplasmic reticulum protein 1	nervous		F+M
SF3B1	0.00375041	0.0437187	0.358059	1.2817	splicing factor 3b, subunit 1, 155kDa	muscle		M
SF3B2	0.000912914	0.0925607	0.411904	1.33044	splicing factor 3b, subunit 2, 145kDa	muscle		F+M
SFPQ	0.00231535	0.0226963	0.399046	1.31864	splicing factor proline/glutamine-rich	muscle		F
SFRS12	0.0013889	0.0311787	0.382118	1.30325	splicing factor, arginine/serine-rich 12	muscle		M
SFRS12IP1	0.000111045	0.0237478	0.600896	1.51666	SFRS12-interacting protein 1	muscle		M
SFRS16	0.0058232	0.0477466	0.524042	1.43798	splicing factor, arginine/serine-rich 16	nervous		F+M
SFRS2B	0.00115493	0.0954609	0.564281	1.47865	splicing factor, arginine/serine-rich 2B	muscle		F+M
SFT2D1	0.000190586	0.0163045	-0.521997	0.696407	SFT2 domain containing 1	muscle		F
SFTPB	0.00140247	0.0994848	0.536131	1.45008	surfactant protein B	muscle		F+M
SGTA	0.00419366	0.04517	-0.439903	0.737184	small glutamine-rich tetratricopeptide repeat (TPR)-containing, alpha	muscle		M
SH3BP5	0.00221978	0.0223564	1.08666	2.12382	SH3-domain binding protein 5 (BTK-associated)	muscle		F
SH3GLB1	0.000158296	0.00717027	0.437123	1.3539	SH3-domain GRB2-like endophilin B1	nervous		F+M
SHCBP1	0.00137159	0.0999038	0.373539	1.29553	SHC SH2-domain binding protein 1	muscle		F+M
SHOC2	0.00116699	0.0302389	0.33032	1.25729	soc-2 suppressor of clear homolog (C. elegans)	muscle		M
SHROOM2	0.000587755	0.0833853	-0.453684	0.730176	shroom family member 2	muscle		F+M
SIAE	7.30223e-05	0.0122225	-0.509361	0.702534	sialic acid acetylesterase	muscle		F
SIVA1	0.0126564	0.0490074	0.32732	1.25468	SIVA1, apoptosis-inducing factor	muscle		F
SKAP2	0.0033113	0.0448859	0.501298	1.41549	src kinase associated phosphoprotein 2	muscle		F
SLC12A2	0.00038887	0.0124644	-0.326086	0.797698	solute carrier family 12 (sodium/potassium/chloride transporters), member 2	muscle		F
SLC16A1	0.00254197	0.0240424	-0.651333	0.636692	solute carrier family 16, member 1 (monocarboxylic acid transporter 1)	muscle		F
SLC16A3	0.000207717	0.0113364	-1.00345	0.498807	solute carrier family 16, member 3 (monocarboxylic acid transporter 4)	muscle		F
SLC1A1	0.0034409	0.0349196	-0.325733	0.797893	solute carrier family 1 (neuronal/epithelial high affinity glutamate transporter, system Xag), member 1	nervous		F+M
SLC20A2	0.00370033	0.0281968	-0.304171	0.809908	solute carrier family 20 (phosphate transporter), member 2	muscle		F
SLC22A14	0.00108266	0.0162546	-0.280611	0.823242	solute carrier family 22, member 14	muscle		F
SLC25A11	0.00327816	0.0242826	-0.475955	0.71899	solute carrier family 25 (mitochondrial carrier; oxoglutarate carrier), member 11	muscle		F
SLC25A12	0.0119684	0.0473418	-0.285398	0.820515	solute carrier family 25 (mitochondrial carrier, Aralar), member 12	muscle		F
SLC25A24	0.00400721	0.044537	0.874207	1.833	solute carrier family 25 (mitochondrial carrier; phosphate carrier), member 24	muscle		M
SLC25A30	0.00105213	0.0941258	-0.633032	0.64482	CDNA FLJ55264 complete cds, highly similar to Homo sapiens solute carrier family 25, member 30 (SLC25A30), mRNA	muscle		F+M
SLC25A36	0.000476346	0.0808542	0.536013	1.44996	solute carrier family 25, member 36	muscle		F+M
SLC25A4	0.000204702	0.011325	-0.399512	0.758115	solute carrier family 25 (mitochondrial carrier; adenine nucleotide translocator), member 4	muscle	duplicate	F
SLC25A4	0.00148457	0.0232665	-0.504268	0.705018	solute carrier family 25 (mitochondrial carrier; adenine nucleotide translocator), member 4	nervous	duplicate	F+M
SLC25A40	0.00348015	0.0445104	-0.423666	0.745528	solute carrier family 25, member 40	muscle		F
SLC25A46	0.000423346	0.0124799	-0.440003	0.737133	solute carrier family 25, member 46	muscle	duplicate	F
SLC25A46	0.00619585	0.0493849	-0.416956	0.749003	solute carrier family 25, member 46	nervous	duplicate	F+M
SLC26A2	0.00802719	0.0389652	-0.292836	0.816296	solute carrier family 26 (sulfate transporter), member 2	muscle		F
SLC29A1	0.0048698	0.0310702	-0.378744	0.769107	solute carrier family 29 (nucleoside transporters), member 1	muscle		F
SLC2A4	0.00416253	0.0289845	-0.415683	0.749664	solute carrier family 2 (facilitated glucose transporter), member 4	muscle		F
SLC2A5	0.00708005	0.0372316	-0.414467	0.750297	solute carrier family 2 (facilitated glucose/fructose transporter), member 5	muscle		F
SLC35E1	0.00729323	0.037811	0.466811	1.38205	solute carrier family 35, member E1	muscle		F
SLC35E3	0.00725462	0.0377563	-0.327608	0.796857	solute carrier family 35, member E3	muscle		F
SLC6A8	0.00333881	0.0259748	-0.522873	0.695985	solute carrier family 6 (neurotransmitter transporter, creatine), member 8	muscle	duplicate	F
SLC6A8	0.00458872	0.041877	0.31046	1.2401	solute carrier family 6 (neurotransmitter transporter, creatine), member 8	nervous	duplicate	F+M
SLC7A2	0.000920303	0.0466138	0.557432	1.47165	solute carrier family 7 (cationic amino acid transporter, y+ system), member 2	muscle		M
SLC7A3	0.00413107	0.0471914	-0.269037	0.829873	solute carrier family 7 (cationic amino acid transporter, y+ system), member 3	muscle	duplicate	F
SLC7A3	3.59974e-06	0.0684336	-0.461081	0.726442	solute carrier family 7 (cationic amino acid transporter, y+ system), member 3	muscle	duplicate	F+M
SLC9A7	7.28405e-05	0.0615444	-0.339406	0.790366	solute carrier family 9 (sodium/hydrogen exchanger), member 7	muscle		F+M
SLC9A8	0.00235676	0.0229353	0.37365	1.29563	solute carrier family 9 (sodium/hydrogen exchanger), member 8	muscle		F
SLCO1A2	0.0107945	0.0449437	-0.305619	0.809095	solute carrier organic anion transporter family, member 1A2	muscle		F
SLFN5	0.000537469	0.0834095	0.810569	1.7539	schlafen family member 5	muscle		F+M
SLMAP	0.00240882	0.0394609	-0.646101	0.639005	sarcolemma associated protein	muscle		F
SLMO2	0.000611559	0.0141947	-0.334388	0.793121	slowmo homolog 2 (Drosophila)	muscle		F
SLU7	0.000933544	0.0466703	0.636476	1.55453	SLU7 splicing factor homolog (S. cerevisiae)	muscle		M
SMAD2	0.0119236	0.0473039	-0.28289	0.821943	SMAD family member 2	muscle		F
SMARCA2	0.00121286	0.0297288	0.402479	1.32178	SWI/SNF related, matrix associated, actin dependent regulator of chromatin, subfamily a, member 2	muscle	duplicate	M
SMARCA2	6.60959e-05	0.00533697	-0.679806	0.624249	SWI/SNF related, matrix associated, actin dependent regulator of chromatin, subfamily a, member 2	nervous	duplicate	F+M
SMARCA5	0.00399928	0.0447781	0.485527	1.4001	SWI/SNF related, matrix associated, actin dependent regulator of chromatin, subfamily a, member 5	muscle		M
SMN2	0.00230773	0.0365896	0.668706	1.58965	survival of motor neuron 2, centromeric///survival of motor neuron 1, telomeric	muscle		M
SMURF1	0.000158272	0.0683832	-0.411385	0.751901	SMAD specific E3 ubiquitin protein ligase 1	muscle		F+M
SNAP23	0.000633187	0.0268494	0.597373	1.51296	synaptosomal-associated protein, 23kDa	muscle		M
SNAPC5	0.000257731	0.0748037	-0.93977	0.521316	small nuclear RNA activating complex, polypeptide 5, 19kDa	muscle		F+M
SNCAIP	0.00284279	0.0422548	-0.284936	0.820778	synuclein, alpha interacting protein	muscle		F
SNORD104	0.00329873	0.0448735	0.342655	1.26809	small nucleolar RNA, C/D box 104	muscle		F
SNRNP200	0.000747068	0.0880699	0.415181	1.33347	small nuclear ribonucleoprotein 200kDa (U5)	muscle		F+M
SNRNP70	0.00124426	0.0173281	0.376731	1.2984	small nuclear ribonucleoprotein 70kDa (U1)	muscle		F
SNW1	0.00107393	0.0302475	0.454429	1.37024	SNW domain containing 1	muscle	duplicate	M
SNW1	0.000566753	0.0825623	0.342976	1.26837	SNW domain containing 1	muscle	duplicate	F+M
SNX15	0.00286296	0.0388693	0.28782	1.22079	sorting nexin 15	muscle		M
SNX2	0.00317447	0.0408947	0.357118	1.28086	sorting nexin 2	muscle		M
SNX3	0.00476396	0.028285	-0.312455	0.80527	sorting nexin 3	muscle		F
SNX5	0.000501738	0.0218976	-0.384029	0.766295	sorting nexin 5	muscle		F
SOCS2	0.00308143	0.0403845	-1.02264	0.492214	suppressor of cytokine signaling 2	muscle		M
SORBS2	0.000320395	0.0774669	1.00698	2.00969	sorbin and SH3 domain containing 2	muscle		F+M
SORD	0.00558031	0.033388	-0.292943	0.816235	sorbitol dehydrogenase	muscle		F
SOX10	0.00245617	0.03041	0.369136	1.29158	SRY (sex determining region Y)-box 10	nervous		F+M
SOX7	0.00480862	0.0416758	-0.432342	0.741058	SRY (sex determining region Y)-box 7	muscle		F
SP3	0.00154936	0.0320809	0.395638	1.31552	Sp3 transcription factor	muscle		M
SPAG16	0.000110223	0.0665209	1.00026	2.00036	sperm associated antigen 16	muscle		F+M
SPAG9	0.00237254	0.0370983	0.379792	1.30115	sperm associated antigen 9	muscle		M
SPATS2L	0.00018557	0.0162363	-0.359421	0.779477	spermatogenesis associated, serine-rich 2-like	muscle		F
SPEM1	0.00118669	0.0962042	-0.373677	0.771813	spermatid maturation 1	muscle		F+M
SPEN	0.00168539	0.0325216	0.380472	1.30177	spen homolog, transcriptional regulator (Drosophila)	muscle		M
SPG7	0.00134642	0.0312251	-0.934329	0.523286	spastic paraplegia 7 (pure and complicated autosomal recessive)	muscle		F
SPOCK1	0.00430843	0.0403095	-0.415328	0.749849	sparc/osteonectin, cwcv and kazal-like domains proteoglycan (testican) 1	nervous		F+M
SPON1	6.14345e-05	0.00570468	0.743956	1.67476	spondin 1, extracellular matrix protein	nervous		F+M
SPTLC1	0.00363609	0.0430501	0.477641	1.39247	serine palmitoyltransferase, long chain base subunit 1	muscle		M
SRCAP	0.000538638	0.0829141	-0.296204	0.814392	Snf2-related CREBBP activator protein	muscle		F+M
SRM	0.0102593	0.0437064	-0.318422	0.801947	spermidine synthase	muscle		F
SRP54	0.00229122	0.0365837	0.318022	1.24662	signal recognition particle 54kDa	muscle		M
SRP68	0.000423571	0.0354459	0.426615	1.34408	signal recognition particle 68kDa	muscle		M
SRPK2	0.00155025	0.0186337	-0.359726	0.779313	SRSF protein kinase 2	muscle		F
SRPRB	0.00219506	0.0367295	0.322507	1.2505	signal recognition particle receptor, B subunit	muscle		M
SRSF10	0.00456703	0.0301383	-0.315336	0.803664	serine/arginine-rich splicing factor 10	muscle		F
SRSF11	0.00093371	0.029403	0.87478	1.83373	serine/arginine-rich splicing factor 11	muscle		M
SRSF5	3.75321e-05	0.00688996	0.407457	1.32635	serine/arginine-rich splicing factor 5	muscle		F
SRSF6	0.00486353	0.0310793	0.358378	1.28198	serine/arginine-rich splicing factor 6	muscle	duplicate	F
SRSF6	0.00310529	0.0403474	0.467382	1.3826	serine/arginine-rich splicing factor 6	muscle	duplicate	M
SS18	0.00116043	0.0304166	0.556143	1.47033	synovial sarcoma translocation, chromosome 18	muscle		M
SSR1	0.00180169	0.0337601	0.501176	1.41537	signal sequence receptor, alpha	muscle		M
SST	0.000151805	0.00713738	-1.10261	0.465674	somatostatin	nervous		F+M
SSX5	0.000411017	0.0793272	-0.299995	0.812255	synovial sarcoma, X breakpoint 5	muscle		F+M
STAB2	0.000991323	0.09376	-0.394053	0.760989	stabilin 2	muscle		F+M
STAG2	0.00156438	0.029698	0.600469	1.51621	stromal antigen 2	muscle		M
STAMBP	0.00606319	0.0348819	-0.364495	0.776741	STAM binding protein	muscle		F
STK24	0.00826785	0.0393761	-0.326212	0.797628	serine/threonine kinase 24	muscle		F
STOM	7.01015e-05	0.00884736	-0.548352	0.683801	stomatin	muscle	duplicate	F
STOM	0.00118464	0.0203709	0.449286	1.36536	stomatin	nervous	duplicate	F+M
STRADB	0.000143105	0.0172161	-0.551633	0.682248	STE20-related kinase adaptor beta	muscle		F
STX6	0.000532317	0.0134503	0.299402	1.23063	syntaxin 6	nervous		F+M
STXBP3	0.000328575	0.0103426	0.323208	1.25111	syntaxin binding protein 3	nervous		F+M
STXBP5L	0.000688196	0.0846802	-0.400977	0.757345	syntaxin binding protein 5-like	muscle		F+M
SUCLA2	0.00231807	0.0226679	-0.324276	0.798699	succinate-CoA ligase, ADP-forming, beta subunit	muscle		F
SUCLG2	0.00208287	0.0359124	0.383675	1.30466	succinate-CoA ligase, GDP-forming, beta subunit	muscle		M
SUMO2	0.00207792	0.0217409	0.288435	1.22131	SMT3 suppressor of mif two 3 homolog 2 (S. cerevisiae)	muscle		F
SUN1	0.00232866	0.0366651	0.432439	1.34951	Sad1 and UNC84 domain containing 1	muscle		M
SUPT4H1	0.000353522	0.0123082	-0.300981	0.8117	suppressor of Ty 4 homolog 1 (S. cerevisiae)	muscle		F
SUPT6H	0.00672808	0.036522	0.29898	1.23027	suppressor of Ty 6 homolog (S. cerevisiae)	muscle		F
SURF4	0.000670395	0.02412	-0.741688	0.598039	surfeit 4	muscle		F
SUZ12P	0.000917238	0.0156966	0.72465	1.6525	suppressor of zeste 12 homolog pseudogene	muscle		F
SYF2	0.00729469	0.0377701	0.307452	1.23752	SYF2 homolog, RNA splicing factor (S. cerevisiae)	muscle		F
SYN2	3.08272e-05	0.00424081	-1.04519	0.484579	synapsin II	nervous		F+M
SYNCRIP	0.00576983	0.0338205	-0.342925	0.788441	synaptotagmin binding, cytoplasmic RNA interacting protein	muscle	duplicate	F
SYNCRIP	0.00459822	0.0454431	0.423187	1.34089	synaptotagmin binding, cytoplasmic RNA interacting protein	muscle	duplicate	M
SYNE1	0.00506532	0.0315209	0.293734	1.22581	spectrin repeat containing, nuclear envelope 1	muscle		F
SYNPO2	0.00376863	0.0454804	0.90766	1.876	synaptopodin 2	muscle		F
SYPL1	0.000405808	0.0116845	0.565529	1.47993	synaptophysin-like 1	nervous		F+M
TAB2	0.0113817	0.0462442	-0.449951	0.732068	TGF-beta activated kinase 1/MAP3K7 binding protein 2	muscle		F
TAC1	0.00598396	0.0485291	-0.45382	0.730107	tachykinin, precursor 1	nervous		F+M
TACC1	0.000866698	0.0896808	-0.738684	0.599286	transforming, acidic coiled-coil containing protein 1	muscle		F+M
TACC2	0.00883887	0.0407501	0.312469	1.24183	transforming, acidic coiled-coil containing protein 2	muscle		F
TACR1	0.00038781	0.0225457	-0.72186	0.606315	tachykinin receptor 1	muscle		M
TAF1	0.00124999	0.0965985	0.552622	1.46675	TAF1 RNA polymerase II, TATA box binding protein (TBP)-associated factor, 250kDa	muscle		F+M
TAGLN2	0.00425612	0.0400217	0.308255	1.23821	transgelin 2	nervous		F+M
TAGLN3	0.00529246	0.0450869	-0.780407	0.582202	transgelin 3	nervous		F+M
TANC2	0.0037733	0.0370774	-0.410118	0.752562	tetratricopeptide repeat, ankyrin repeat and coiled-coil containing 2	nervous		F+M
TAOK3	0.00425038	0.04535	0.608108	1.52426	TAO kinase 3	muscle		M
TAX1BP1	0.00560477	0.0466749	0.287295	1.22035	Tax1 (human T-cell leukemia virus type I) binding protein 1	nervous		F+M
TAX1BP3	0.000535377	0.0134362	0.653897	1.57341	Tax1 (human T-cell leukemia virus type I) binding protein 3	nervous		F+M
TBC1D1	0.0130322	0.0498888	-0.379417	0.768748	TBC1 (tre-2/USP6, BUB2, cdc16) domain family, member 1	muscle		F
TBC1D12	0.0014838	0.0315889	0.406431	1.3254	TBC1 domain family, member 12	muscle		M
TBC1D30	0.000551779	0.0825961	0.773577	1.7095	TBC1 domain family, member 30	muscle		F+M
TBC1D4	0.00760604	0.0383497	0.306555	1.23675	TBC1 domain family, member 4	muscle		F
TBCA	0.00336415	0.0417946	0.390118	1.3105	tubulin folding cofactor A	muscle	duplicate	M
TBCA	0.00106827	0.0195463	0.308195	1.23816	tubulin folding cofactor A	nervous	duplicate	F+M
TBCK	0.00429653	0.048223	-0.40423	0.755639	TBC1 domain containing kinase	muscle		F
TBRG1	0.00114082	0.0959641	-0.546214	0.684815	transforming growth factor beta regulator 1	muscle		F+M
TCEB1	0.000966251	0.0161254	-0.303193	0.810457	transcription elongation factor B (SIII), polypeptide 1 (15kDa, elongin C)	muscle		F
TCERG1	0.000451518	0.0246681	0.559741	1.474	transcription elongation regulator 1	muscle		M
TCF20	0.00143513	0.0227801	-0.415633	0.749691	transcription factor 20 (AR1)	nervous		F+M
TCF7L2	0.00487882	0.0310786	-0.400489	0.757601	transcription factor 7-like 2 (T-cell specific, HMG-box)	muscle		F
TECR	1.74585e-05	0.00542374	-0.455302	0.729357	trans-2,3-enoyl-CoA reductase	muscle		F
TENC1	0.00126832	0.0173051	-0.295866	0.814583	tensin like C1 domain containing phosphatase (tensin 2)	muscle		F
TEX11	0.00105956	0.0939065	0.504531	1.41866	testis expressed 11	muscle		F+M
TFCP2	0.0117089	0.0467274	-0.30173	0.811279	transcription factor CP2	muscle		F
TFDP1	0.00424063	0.0276419	-0.409205	0.753038	transcription factor Dp-1	muscle		F
TFEB	0.00764806	0.0383224	0.281419	1.21539	transcription factor EB	muscle		F
TFRC	0.0037382	0.0259858	-0.990867	0.503175	transferrin receptor (p90, CD71)	muscle		F
TGFBR3	0.00110464	0.0949939	1.04355	2.0613	transforming growth factor, beta receptor III	muscle		F+M
TGOLN2	0.00372689	0.0369143	-0.623205	0.649227	trans-golgi network protein 2	nervous		F+M
THUMPD1	0.00229046	0.0367008	0.570348	1.48488	THUMP domain containing 1	muscle		M
TIMM17A	0.00512809	0.0316675	-0.404203	0.755654	translocase of inner mitochondrial membrane 17 homolog A (yeast)	muscle	duplicate	F
TIMM17A	6.83093e-05	0.00448883	-0.589729	0.664468	translocase of inner mitochondrial membrane 17 homolog A (yeast)	nervous	duplicate	F+M
TIMM23B	0.00109098	0.0162586	-0.467772	0.72308	translocase of inner mitochondrial membrane 23 homolog B (yeast)///translocase of inner mitochondrial membrane 23 homolog (yeast)-like	muscle		F
TIMM50	0.00311394	0.044073	-0.469929	0.722	translocase of inner mitochondrial membrane 50 homolog (S. cerevisiae)	muscle		F
TIMP3	0.0124413	0.0484534	-0.375936	0.770605	TIMP metallopeptidase inhibitor 3	muscle		F
TIPARP	0.000478973	0.012799	0.562949	1.47729	TCDD-inducible poly(ADP-ribose) polymerase	nervous		F+M
TJP2	0.00267534	0.0312486	0.333671	1.26022	tight junction protein 2 (zona occludens 2)	nervous		F+M
TLE4	0.00339763	0.0346699	0.422227	1.33999	transducin-like enhancer of split 4 (E(sp1) homolog, Drosophila)	nervous		F+M
TLK1	0.00182032	0.0336914	0.526548	1.44048	tousled-like kinase 1	muscle		M
TLN1	0.0037945	0.0370894	0.428789	1.3461	talin 1	nervous		F+M
TM4SF1	0.00061232	0.0141311	-0.286797	0.81972	transmembrane 4 L six family member 1	muscle		F
TM6SF1	0.00153313	0.0186499	-0.369033	0.774301	transmembrane 6 superfamily member 1	muscle		F
TM9SF2	0.00505503	0.0315541	-0.333539	0.793587	transmembrane 9 superfamily member 2	muscle		F
TMCO1	0.00513113	0.0489845	0.508566	1.42264	transmembrane and coiled-coil domains 1	muscle		M
TMED1	0.00112881	0.0306509	-0.502483	0.705891	transmembrane emp24 protein transport domain containing 1	muscle		M
TMED10	0.00500145	0.0362249	0.345479	1.27057	transmembrane emp24-like trafficking protein 10 (yeast)	nervous		F+M
TMED2	0.00264712	0.0243526	-0.835876	0.560243	transmembrane emp24 domain trafficking protein 2	muscle		F
TMEM103	0.000263558	0.0747825	-0.544592	0.685585	CDNA FLJ54324 complete cds	muscle		F+M
TMEM123	1.25538e-05	0.00274288	0.642576	1.56111	transmembrane protein 123	nervous		F+M
TMEM126A	0.00277643	0.0420808	-0.522319	0.696252	transmembrane protein 126A	muscle		F
TMEM135	0.000429082	0.012467	-0.362691	0.777713	transmembrane protein 135	muscle		F
TMEM150A	0.00401492	0.0469798	-0.43728	0.738526	transmembrane protein 150A	muscle		F
TMEM164	0.00393058	0.0465591	-0.29724	0.813808	transmembrane protein 164	muscle		F
TMEM167A	0.00407991	0.0465293	-0.300402	0.812026	transmembrane protein 167A	muscle		F
TMEM168	0.00424993	0.0454522	0.571589	1.48616	transmembrane protein 168	muscle		M
TMEM189-UBE2V1	0.00214014	0.0217715	-0.481937	0.716016	TMEM189-UBE2V1 readthrough///ubiquitin-conjugating enzyme E2 variant 1	muscle		F
TMEM20	0.0034274	0.0448795	-0.265351	0.831996	transmembrane protein 20	muscle		F
TMEM208	0.00548501	0.0497446	0.323521	1.25138	transmembrane protein 208	muscle		M
TMEM41B	0.00314268	0.0407165	0.385925	1.3067	transmembrane protein 41B	muscle		M
TMEM43	0.00136917	0.0311991	0.329351	1.25645	transmembrane protein 43	muscle		M
TMEM47	0.00017705	0.00764674	0.533878	1.44782	transmembrane protein 47	nervous		F+M
TMEM64	0.000272423	0.0327711	0.740248	1.67046	transmembrane protein 64	muscle		M
TMEM80	0.000211244	0.0730162	0.663034	1.58341	transmembrane protein 80	muscle		F+M
TMEM87A	0.00532205	0.0493524	0.358879	1.28243	transmembrane protein 87A	muscle		M
TMEM88	0.00310891	0.0441642	-0.467201	0.723366	transmembrane protein 88	muscle		F
TMEM97	0.00458445	0.0472469	0.736013	1.66557	transmembrane protein 97	muscle		M
TMPO	0.00138173	0.0994987	0.568771	1.48326	thymopoietin	muscle		F+M
TMPRSS3	0.00342588	0.0271826	0.287917	1.22088	transmembrane protease, serine 3	muscle		F
TNFRSF9	0.00323463	0.0268246	-0.280251	0.823448	tumor necrosis factor receptor superfamily, member 9	muscle		F
TNK2	0.00107297	0.0162908	0.604073	1.52	tyrosine kinase, non-receptor, 2	muscle		F
TNNT3	0.000557936	0.0822229	-0.60555	0.657221	troponin T type 3 (skeletal, fast)	muscle		F+M
TNS3	0.00465663	0.0473452	0.529084	1.44301	tensin 3	muscle		M
TOB1	0.000547628	0.0135604	0.514842	1.42884	transducer of ERBB2, 1	nervous		F+M
TOMM70A	0.00334997	0.0270587	-0.41289	0.751117	translocase of outer mitochondrial membrane 70 homolog A (S. cerevisiae)	muscle		F
TOP2B	0.00319182	0.0341655	-0.575788	0.67092	topoisomerase (DNA) II beta 180kDa	nervous		F+M
TOR1AIP1	0.00103984	0.0196055	0.392762	1.3129	torsin A interacting protein 1	nervous		F+M
TP53BP2	0.00472793	0.0388689	0.406311	1.32529	tumor protein p53 binding protein, 2	nervous		F+M
TP53INP1	0.000315686	0.0337559	0.624787	1.54198	tumor protein p53 inducible nuclear protein 1	muscle		M
TPD52L1	0.00406456	0.0286481	-0.474129	0.719901	tumor protein D52-like 1	muscle		F
TPD52L2	0.00135267	0.0219399	0.417504	1.33561	tumor protein D52-like 2	nervous		F+M
TPI1	0.00206986	0.0217694	-0.336115	0.792172	triosephosphate isomerase 1	muscle	duplicate	F
TPI1	0.00104389	0.0919756	-0.749538	0.594794	triosephosphate isomerase 1	muscle	duplicate	F+M
TPM3	0.000650127	0.0855319	0.587555	1.5027	tropomyosin 3	muscle		F+M
TPM4	1.83337e-05	0.00493623	-0.479723	0.717115	tropomyosin 4	muscle		F
TPP1	0.00163766	0.0190056	-0.381068	0.767869	tripeptidyl peptidase I	muscle		F
TPPP	0.00306669	0.0334037	-0.583988	0.667117	tubulin polymerization promoting protein	nervous		F+M
TPR	0.000412108	0.0754242	0.701992	1.62675	translocated promoter region (to activated MET oncogene)	muscle		F+M
TPRKB	0.00112196	0.0164772	-0.351121	0.783975	TP53RK binding protein	muscle		F
TRAK1	0.00103545	0.0161461	-0.317172	0.802642	trafficking protein, kinesin binding 1	muscle		F
TRAM1	0.000135729	0.00996658	-0.445486	0.734337	translocation associated membrane protein 1	muscle	duplicate	F
TRAM1	0.00559998	0.0498893	0.371478	1.29368	translocation associated membrane protein 1	muscle	duplicate	M
TRAM1	7.54399e-05	0.00571852	0.39254	1.3127	translocation associated membrane protein 1	nervous	duplicate	F+M
TRIB3	0.000875776	0.0912281	0.476044	1.39092	tribbles homolog 3 (Drosophila)	muscle		F+M
TRIM13	0.000704733	0.0842608	0.676211	1.59794	tripartite motif-containing 13	muscle		F+M
TRIM7	0.000585033	0.0388284	0.500812	1.41501	tripartite motif-containing 7	muscle		M
TRIP12	0.0045938	0.0472359	0.353504	1.27766	thyroid hormone receptor interactor 12	muscle		M
TRMT11	0.00478991	0.0476322	0.576134	1.49085	tRNA methyltransferase 11 homolog (S. cerevisiae)	muscle		M
TRMT112	0.00119806	0.0170974	0.313351	1.24259	tRNA methyltransferase 11-2 homolog (S. cerevisiae)	muscle	duplicate	F
TRMT112	0.000533529	0.0246871	0.525128	1.43906	tRNA methyltransferase 11-2 homolog (S. cerevisiae)	muscle	duplicate	M
TRMT5	8.5479e-05	0.0161505	0.611626	1.52798	TRM5 tRNA methyltransferase 5 homolog (S. cerevisiae)	muscle		M
TRPC1	0.00736515	0.0378439	-0.324952	0.798325	transient receptor potential cation channel, subfamily C, member 1	muscle		F
TSC22D2	0.00265019	0.0387663	0.815931	1.76043	TSC22 domain family, member 2	muscle		M
TSC22D4	0.000391743	0.0115481	0.481154	1.39586	TSC22 domain family, member 4	nervous		F+M
TSHR	0.000714719	0.084132	-0.27279	0.827717	thyroid stimulating hormone receptor	muscle		F+M
TSNAX	0.000224187	0.0203319	0.737924	1.66777	translin-associated factor X	muscle		M
TSPAN31	0.00148369	0.018609	-0.328372	0.796435	tetraspanin 31	muscle		F
TSPYL2	0.00454024	0.0415367	-0.685964	0.62159	TSPY-like 2	nervous		F+M
TSSK2	0.000123706	0.0635604	-0.49599	0.709075	testis-specific serine kinase 2	muscle		F+M
TSTD1	0.000929766	0.0300786	0.577131	1.49188	thiosulfate sulfurtransferase (rhodanese)-like domain containing 1	muscle		F
TTLL5	0.000361522	0.0794542	0.507274	1.42136	Tubulin tyrosine ligase-like family, member 5, mRNA (cDNA clone IMAGE:3868578)	muscle		F+M
TTTY14	0.000357344	0.0803948	-0.622864	0.649381	testis-specific transcript, Y-linked 14	muscle		F+M
TUBB2A	0.00371076	0.0434801	0.930207	1.90555	tubulin, beta 2A	muscle		M
TUBB2B	0.00107487	0.0162586	0.572997	1.48761	tubulin, beta 2B	muscle		F
TUBG1	0.000891179	0.0157169	-0.410566	0.752328	tubulin, gamma 1	muscle		F
TUBGCP4	0.000481604	0.025102	-0.719829	0.607169	tubulin, gamma complex associated protein 4	muscle	duplicate	M
TUBGCP4	0.00232302	0.0297532	-0.295579	0.814745	tubulin, gamma complex associated protein 4	nervous	duplicate	F+M
TUG1	0.000140345	0.0667017	0.562095	1.47641	taurine upregulated 1 (non-protein coding)	muscle		F+M
TWF1	0.00128258	0.021173	0.571736	1.48631	twinfilin, actin-binding protein, homolog 1 (Drosophila)	nervous		F+M
TXLNB	0.000469372	0.0361363	0.503248	1.4174	taxilin beta	muscle		M
TXNDC9	0.000205692	0.0198453	0.35571	1.27961	thioredoxin domain containing 9	muscle		M
TXNIP	0.00113136	0.0199157	0.765783	1.70029	thioredoxin interacting protein	nervous		F+M
TYRP1	0.0127498	0.0492277	-0.387005	0.764716	tyrosinase-related protein 1	muscle		F
TYSND1	0.000266421	0.0750348	-0.521699	0.696551	trypsin domain containing 1	muscle		F+M
U2AF1	0.00253168	0.0309324	0.339436	1.26526	U2 small nuclear RNA auxiliary factor 1	nervous		F+M
U2AF2	0.0103311	0.0438737	0.29242	1.22469	U2 small nuclear RNA auxiliary factor 2	muscle		F
UBA2	0.0022811	0.036811	0.581752	1.49667	ubiquitin-like modifier activating enzyme 2	muscle		M
UBAP2L	0.00684735	0.0367252	-0.296648	0.814142	ubiquitin associated protein 2-like	muscle		F
UBE2A	0.00161288	0.0189909	-0.431635	0.741421	ubiquitin-conjugating enzyme E2A (RAD6 homolog)	muscle		F
UBE2B	0.00540011	0.0493696	0.395622	1.31551	ubiquitin-conjugating enzyme E2B (RAD6 homolog)	muscle		M
UBE2D1	0.00862331	0.040169	-0.605246	0.657359	ubiquitin-conjugating enzyme E2D 1 (UBC4/5 homolog, yeast)	muscle	duplicate	F
UBE2D1	0.0007706	0.0159902	-0.444565	0.734806	ubiquitin-conjugating enzyme E2D 1 (UBC4/5 homolog, yeast)	nervous	duplicate	F+M
UBE2D2	0.00346035	0.0350214	-0.382908	0.76689	ubiquitin-conjugating enzyme E2D 2 (UBC4/5 homolog, yeast)	nervous		F+M
UBE2D3	0.00399246	0.0252466	-0.316896	0.802795	ubiquitin-conjugating enzyme E2D 3 (UBC4/5 homolog, yeast)	muscle		F
UBE2S	0.0021462	0.0270328	-0.568951	0.674107	ubiquitin-conjugating enzyme E2S	nervous		F+M
UBE3C	0.00034752	0.0791209	-0.554235	0.681018	ubiquitin protein ligase E3C	muscle		F+M
UBL4B	5.05521e-05	0.0582444	-0.51904	0.697836	ubiquitin-like 4B	muscle		F+M
UBR5	0.000358246	0.0801236	-0.372834	0.772264	ubiquitin protein ligase E3 component n-recognin 5	muscle		F+M
UCHL3	0.00166503	0.0191036	-0.500938	0.706647	ubiquitin carboxyl-terminal esterase L3 (ubiquitin thiolesterase)	muscle		F
UCHL5	0.00706118	0.0373267	-0.37974	0.768576	ubiquitin carboxyl-terminal hydrolase L5	muscle		F
UCP2	0.00172368	0.0196094	0.495881	1.41018	uncoupling protein 2 (mitochondrial, proton carrier)	muscle		F
UNG	0.00522124	0.0447883	0.523056	1.437	uracil-DNA glycosylase	nervous		F+M
UQCR10	0.000183922	0.0168583	-0.466372	0.723783	ubiquinol-cytochrome c reductase, complex III subunit X	muscle		F
UQCRB	0.000485752	0.0128221	-0.320221	0.800947	ubiquinol-cytochrome c reductase binding protein	muscle		F
UQCRC1	0.00680678	0.0366536	-0.270072	0.829278	ubiquinol-cytochrome c reductase core protein I	muscle		F
UQCRC2	0.000353942	0.012093	-0.406281	0.754566	ubiquinol-cytochrome c reductase core protein II	muscle		F
UQCRFS1	0.00213333	0.0218121	-0.281072	0.822979	ubiquinol-cytochrome c reductase, Rieske iron-sulfur polypeptide 1	muscle		F
UQCRH	9.30491e-06	0.00536847	-0.39124	0.762474	ubiquinol-cytochrome c reductase hinge protein	muscle		F
UROS	0.0043774	0.0295632	-0.314119	0.804342	uroporphyrinogen III synthase	muscle	duplicate	F
UROS	0.00107905	0.0196467	-0.478632	0.717658	uroporphyrinogen III synthase	nervous	duplicate	F+M
USMG5	0.00354115	0.0446966	-0.325691	0.797916	up-regulated during skeletal muscle growth 5 homolog (mouse)	muscle		F
USP1	0.00463659	0.0379811	0.532777	1.44671	ubiquitin specific peptidase 1	muscle		M
USP12	0.00416365	0.0395527	-0.261861	0.834011	ubiquitin specific peptidase 12	nervous		F+M
USP15	0.00025376	0.0117799	-0.386431	0.76502	ubiquitin specific peptidase 15	muscle		F
USP34	1.5491e-05	0.0535445	0.428104	1.34546	ubiquitin specific peptidase 34	muscle		F+M
USP6	0.00162608	0.0189256	0.561058	1.47535	ubiquitin specific peptidase 6 (Tre-2 oncogene)	muscle		F
UTRN	0.00446703	0.0412735	-0.375881	0.770635	utrophin	nervous		F+M
VAMP3	0.00243335	0.037278	0.342914	1.26832	vesicle-associated membrane protein 3 (cellubrevin)	muscle	duplicate	M
VAMP3	0.000235159	0.00873453	0.455311	1.37108	vesicle-associated membrane protein 3 (cellubrevin)	nervous	duplicate	F+M
VAMP4	0.000276439	0.011877	-0.514144	0.700208	vesicle-associated membrane protein 4	muscle		F
VAMP7	0.00334901	0.0271052	-0.301719	0.811285	vesicle-associated membrane protein 7	muscle		F
VAPA	0.00104429	0.0943118	0.451939	1.36788	VAMP (vesicle-associated membrane protein)-associated protein A, 33kDa	muscle		F+M
VAT1	0.000262051	0.00909665	0.51431	1.42831	vesicle amine transport protein 1 homolog (T. californica)	nervous		F+M
VCAN	0.000511926	0.0130669	0.695197	1.61911	versican	nervous		F+M
VDAC1P1	3.95096e-06	0.00244585	-0.937394	0.522175	voltage-dependent anion channel 1 pseudogene 1///voltage-dependent anion channel 1	nervous		F+M
VEGFA	0.000805928	0.0152809	-0.47029	0.721819	vascular endothelial growth factor A	muscle		F
VIM	0.00117988	0.0203835	0.633233	1.55104	vimentin	nervous		F+M
VIP	0.00501809	0.0434185	-0.388901	0.763711	vasoactive intestinal peptide	nervous		F+M
VLDLR	2.25559e-07	0.000910956	-0.516147	0.699237	very low density lipoprotein receptor	muscle		F
VPS13C	0.00176153	0.0334972	0.747766	1.67919	vacuolar protein sorting 13 homolog C (S. cerevisiae)	muscle	duplicate	M
VPS13C	0.000363424	0.0785109	0.836713	1.78598	KIAA1421 protein	muscle	duplicate	F+M
VPS26A	0.000536767	0.0240992	0.421148	1.33899	vacuolar protein sorting 26 homolog A (S. pombe)	muscle		M
VPS35	0.00457491	0.0473638	0.398597	1.31823	vacuolar protein sorting 35 homolog (S. cerevisiae)	muscle		M
VPS45	5.24981e-05	0.0587074	-0.438894	0.7377	vacuolar protein sorting 45 homolog (S. cerevisiae)	muscle		F+M
VTI1B	0.000604337	0.0142731	-0.423727	0.745496	vesicle transport through interaction with t-SNAREs homolog 1B (yeast)	muscle		F
VWF	0.00300316	0.0331985	0.703575	1.62854	von Willebrand factor	nervous		F+M
WBP4	0.000114898	0.00636969	0.286108	1.21935	WW domain binding protein 4 (formin binding protein 21)	nervous		F+M
WDFY3	0.000365863	0.0221205	0.405012	1.3241	WD repeat and FYVE domain containing 3	muscle		M
WDR12	0.00185654	0.0205987	-0.265853	0.831707	WD repeat domain 12	muscle		F
WDR26	0.00469357	0.0306726	-0.289795	0.818019	WD repeat domain 26	muscle		F
WDR34	0.000124992	0.0229119	-0.475675	0.71913	WD repeat domain 34	muscle		M
WDR45	0.00280648	0.0249108	-0.271014	0.828737	WD repeat domain 45	muscle		F
WDR45L	0.00115614	0.0306588	0.512611	1.42663	WDR45-like	muscle		M
WDR5B	0.000200433	0.0718937	0.436367	1.35319	WD repeat domain 5B	muscle		F+M
WDR61	0.00463989	0.0472809	0.681462	1.60376	WD repeat domain 61	muscle		M
WDR92	0.000128779	0.00683321	-1.11336	0.462216	WD repeat domain 92///protein phosphatase 3, regulatory subunit B, alpha	nervous		F+M
WDTC1	0.000723537	0.0147581	-0.305077	0.809399	WD and tetratricopeptide repeats 1	muscle		F
WFS1	8.14364e-05	0.00560149	0.530594	1.44452	Wolfram syndrome 1 (wolframin)	nervous		F+M
WIBG	0.000147339	0.0171884	-0.275007	0.826446	within bgcn homolog (Drosophila)	muscle		F
WIPI1	0.00237875	0.0187217	-0.577422	0.67016	WD repeat domain, phosphoinositide interacting 1	muscle		F
WIPI2	0.00494263	0.0483035	0.400726	1.32017	WD repeat domain, phosphoinositide interacting 2	muscle		M
WNK1	2.70904e-05	0.00437488	0.651698	1.57102	WNK lysine deficient protein kinase 1	nervous		F+M
WNT10B	0.000521029	0.0135333	-0.357917	0.78029	wingless-type MMTV integration site family, member 10B	nervous		F+M
WNT7B	0.000757954	0.0860254	-0.493871	0.710117	wingless-type MMTV integration site family, member 7B	muscle		F+M
WSB1	0.000127972	0.0148795	0.624369	1.54154	WD repeat and SOCS box-containing 1	muscle		M
WSB2	0.00114772	0.0166138	-0.372296	0.772552	WD repeat and SOCS box-containing 2	muscle		F
WTAP	0.00447847	0.0469008	0.297334	1.22887	Wilms tumor 1 associated protein	muscle		M
WWOX	0.000142579	0.0669265	-0.971363	0.510024	WW domain containing oxidoreductase	muscle		F+M
WWP1	0.00112861	0.019962	-0.347915	0.785719	WW domain containing E3 ubiquitin protein ligase 1	nervous		F+M
WWTR1	0.000166018	0.00742942	0.898923	1.86467	WW domain containing transcription regulator 1	nervous		F+M
XIAP	0.000892779	0.0458225	0.650973	1.57023	X-linked inhibitor of apoptosis	muscle		M
XPO1	0.00424962	0.0455563	0.401038	1.32046	exportin 1 (CRM1 homolog, yeast)	muscle		M
XRCC5	0.00403617	0.0426827	0.36949	1.2919	X-ray repair complementing defective repair in Chinese hamster cells 5 (double-strand-break rejoining)	muscle		M
YAP1	0.0039535	0.0466869	-0.3744	0.771426	Yes-associated protein 1	muscle		F
YES1	0.00747264	0.0380572	-0.317724	0.802335	v-yes-1 Yamaguchi sarcoma viral oncogene homolog 1	muscle	duplicate	F
YES1	0.00556888	0.0464822	0.506402	1.4205	v-yes-1 Yamaguchi sarcoma viral oncogene homolog 1	nervous	duplicate	F+M
YME1L1	0.000698212	0.0840095	-0.414045	0.750516	YME1-like 1 (S. cerevisiae)	muscle		F+M
YPEL5	0.00278064	0.0389169	0.293342	1.22548	yippee-like 5 (Drosophila)	muscle		M
YWHAE	0.00725	0.0378298	-0.785691	0.580074	tyrosine 3-monooxygenase/tryptophan 5-monooxygenase activation protein, epsilon polypeptide	muscle		F
YWHAQ	0.0119743	0.047319	0.35011	1.27466	tyrosine 3-monooxygenase/tryptophan 5-monooxygenase activation protein, theta polypeptide	muscle		F
YWHAZ	0.00194089	0.0210149	-0.401125	0.757267	tyrosine 3-monooxygenase/tryptophan 5-monooxygenase activation protein, zeta polypeptide	muscle	duplicate	F
YWHAZ	0.0064041	0.0466029	0.555337	1.46951	tyrosine 3-monooxygenase/tryptophan 5-monooxygenase activation protein, zeta polypeptide	muscle	duplicate	M
YWHAZ	0.000104186	0.00614253	-1.30208	0.405542	tyrosine 3-monooxygenase/tryptophan 5-monooxygenase activation protein, zeta polypeptide	nervous	duplicate	F+M
ZBTB10	0.00618007	0.0351043	-0.428929	0.742813	zinc finger and BTB domain containing 10	muscle		F
ZBTB47	0.0021551	0.0370381	-0.266761	0.831184	zinc finger and BTB domain containing 47	muscle		F
ZBTB8	0.00109256	0.0950586	-0.603036	0.658367	zinc finger and BTB domain containing 8-like /// zinc finger and BTB domain containing 8	muscle		F+M
ZBTB8B	4.95132e-05	0.0158832	0.584491	1.49951	zinc finger and BTB domain containing 8B///zinc finger and BTB domain containing 8A	muscle		M
ZC3H14	0.00229894	0.0365782	0.553568	1.46771	zinc finger CCCH-type containing 14	muscle		M
ZC3H8	0.00434663	0.0483623	-0.27619	0.825769	zinc finger CCCH-type containing 8	muscle		F
ZCCHC10	0.00122857	0.0301252	-0.328295	0.796477	zinc finger, CCHC domain containing 10	muscle		F
ZCCHC24	4.85638e-05	0.00501059	0.708956	1.63462	zinc finger, CCHC domain containing 24	nervous		F+M
ZCCHC6	0.0036151	0.0450394	-0.274027	0.827008	zinc finger, CCHC domain containing 6	muscle		F
ZDHHC11	0.00142288	0.0311699	1.03187	2.04467	zinc finger, DHHC-type containing 11	muscle		M
ZDHHC3	9.69701e-05	0.061449	0.263042	1.20001	zinc finger, DHHC-type containing 3	muscle		F+M
ZDHHC4	0.00964245	0.0417838	-0.264047	0.832749	zinc finger, DHHC-type containing 4	muscle		F
ZDHHC5	0.00151379	0.0326296	-0.419547	0.747659	zinc finger, DHHC-type containing 5	muscle		F
ZEB2	0.00267103	0.0313958	0.663024	1.5834	zinc finger E-box binding homeobox 2	nervous		F+M
ZER1	0.00044785	0.0250719	-0.529378	0.692854	zer-1 homolog (C. elegans)	muscle		M
ZFAND6	0.00480554	0.047579	0.335375	1.26171	zinc finger, AN1-type domain 6	muscle		M
ZFHX3	0.000950106	0.029737	0.37923	1.30065	zinc finger homeobox 3	muscle		F
ZFP112	0.00107324	0.0942405	0.563808	1.47817	zinc finger protein 112 homolog (mouse)	muscle		F+M
ZFP28	0.00118125	0.0299178	-0.337101	0.79163	zinc finger protein 28 homolog (mouse)	muscle		F
ZFP36L2	0.000110587	0.014749	1.01456	2.02028	zinc finger protein 36, C3H type-like 2	muscle		M
ZHX2	0.000154902	0.00710317	0.725141	1.65306	zinc fingers and homeoboxes 2	nervous		F+M
ZHX3	0.000178457	0.00753232	0.363291	1.28636	zinc fingers and homeoboxes 3	nervous		F+M
ZIK1	0.00271097	0.0417461	-0.339681	0.790216	zinc finger protein interacting with K protein 1 homolog (mouse)	muscle		F
ZMAT1	0.00119602	0.0963439	0.676825	1.59862	zinc finger, matrin type 1	muscle		F+M
ZMPSTE24	0.00862707	0.0401402	-0.276467	0.825611	zinc metallopeptidase (STE24 homolog, S. cerevisiae)	muscle		F
ZNF146	0.000282223	0.0766467	-0.44053	0.736864	zinc finger protein 146	muscle	duplicate	F+M
ZNF146	0.0012125	0.0204709	0.342135	1.26763	zinc finger protein 146	nervous	duplicate	F+M
ZNF148	0.00415886	0.0396085	-0.392851	0.761623	zinc finger protein 148	nervous		F+M
[truncated: 25 more rows]

## Sheet: KEGGs_muscle_nervous
Over-represented KEGG pathways and their enriched DEGs in nervous and skeletal muscle tissues during in vivo ageing
DATASET	GDS287							GDS156								GDS288		GDS472								GDS473				GSE5086								GDS707
KEGG PATHWAY	Calcium signaling pathway - Homo sapiens (human)	Focal adhesion - Homo sapiens (human)	MAPK signaling pathway - Homo sapiens (human)	Regulation of actin cytoskeleton - Homo sapiens (human)	Adherens junction - Homo sapiens (human)	Proteasome - Homo sapiens (human)	Jak-STAT signaling pathway - Homo sapiens (human)	Metabolic pathways - Homo sapiens (human)	Focal adhesion - Homo sapiens (human)	MAPK signaling pathway - Homo sapiens (human)	Huntington's disease - Homo sapiens (human)	Cardiac muscle contraction - Homo sapiens (human)	Alzheimer's disease - Homo sapiens (human)	Oxidative phosphorylation - Homo sapiens (human)	Parkinson's disease - Homo sapiens (human)	Tight junction - Homo sapiens (human)	MAPK signaling pathway - Homo sapiens (human)	Insulin signaling pathway - Homo sapiens (human)	Focal adhesion - Homo sapiens (human)	Leukocyte transendothelial migration - Homo sapiens (human)	Axon guidance - Homo sapiens (human)	Regulation of actin cytoskeleton - Homo sapiens (human)	Oxidative phosphorylation - Homo sapiens (human)	Citrate cycle (TCA cycle) - Homo sapiens (human)	Pyruvate metabolism - Homo sapiens (human)	Regulation of actin cytoskeleton - Homo sapiens (human)	MAPK signaling pathway - Homo sapiens (human)	Ubiquinone and other terpenoid-quinone biosynthesis - Homo sapiens (human)	Oxidative phosphorylation - Homo sapiens (human)	Pathways in cancer - Homo sapiens (human)	Metabolic pathways - Homo sapiens (human)	MAPK signaling pathway - Homo sapiens (human)	Focal adhesion - Homo sapiens (human)	Thyroid cancer - Homo sapiens (human)	T cell receptor signaling pathway - Homo sapiens (human)	Metabolism of xenobiotics by cytochrome P450 - Homo sapiens (human)	Glycolysis / Gluconeogenesis - Homo sapiens (human)	MAPK signaling pathway - Homo sapiens (human)	Focal adhesion - Homo sapiens (human)	Pathways in cancer - Homo sapiens (human)	Neuroactive ligand-receptor interaction - Homo sapiens (human)	Metabolic pathways - Homo sapiens (human)	Phosphatidylinositol signaling system - Homo sapiens (human)	Calcium signaling pathway - Homo sapiens (human)	Regulation of actin cytoskeleton - Homo sapiens (human)
OT p-value/Gene p-value	0.0221873	0.00322525	0.0112711	0.000650804	2.31163e-05	0.000798356	0.000811299	5.33847e-11	0.0154645	0.00610871	3.76468e-11	1.74372e-12	2.65543e-12	1.03539e-11	2.16206e-11	0.0142382	0.0486055	0.00087505	0.000889429	0.0112152	0.0152195	0.0423987	9.79338e-11	6.92919e-10	5.48018e-08	0.000262824	0.00576264	1.52594e-07	2.33717e-05	0.000102041	0.000257028	0.000516711	0.0130458	1.21128e-09	6.7471e-06	1.18172e-05	1.66304e-05	9.93461e-11	2.1619e-06	3.10618e-05	0.000994786	0.0336651	1.23753e-07	4.98305e-07	4.30906e-06
Enrichment	14/165	18/186	20/239	20/188	13/75	6/31	16/140	40/746	7/181	9/221	25/136	12/56	27/131	24/88	25/90	2/67	2/108	10/125	13/186	7/107	7/113	9/188	25/104	9/25	9/37	8/106	6/108	3/4	6/44	5/297	9/1031	4/263	2/197	4/20	4/105	3/56	3/61	12/263	6/197	6/297	4/255	6/1031	8/65	11/151	10/154
#UP	10	15	16	17	13	6	14	2	3	4	0	1	0	0	0	2	2	2	5	3	1	2	0	0	0	1	1	0	0	3	4	2	1	2	2	3	1	5	2	3	1	2	3	2	6
#DOWN	4	3	4	3	0	0	2	38	4	5	25	11	27	24	25	0	0	8	8	4	6	7	25	9	9	7	5	3	6	2	5	2	1	2	2	0	2	7	4	3	3	4	5	9	4
GENES	ADCY2	ACTC1	ATF2	ACTC1	ACTC1	PSMA4	CBLB	AK1	IGF1	CACNG1	ATP5C1	CACNG1	ATP5C1	ATP5C1	ATP5C1	INADL	GRB2	ARAF	ACTC1	ACTC1	NFATC1	ACTC1	ATP5B	ACO2	ALDH1B1	ABI2	BRAF	COQ3	COX4I1	CDKN2B	ADH1B	IL1R2	PAK1	TPM3	DLG1	ADH1B	ADH1B	CACNB2	MAPK9	FGF1	GABRB3	ATP5A1	CALM1	ATP2B2	ABI2
	AGTR1	ACTG1	CACNA1I	ACTG1	ACTG1	PSMA7	CREBBP	ATP5C1	PDGFRB	DUSP3	ATP5G1	COX4I1	ATP5G1	ATP5G1	ATP5G1	VAPA	PPM1A	EIF4E	COL3A1	CDH5	NRP1	ARAF	ATP5F1	DLD	DLAT	ARHGEF7	CACNG6	COQ5	NDUFA12	PAX8	AK1	PAK1	PAK2	TPR	PAK1	MGST1	LDHA	FGF1	PAK1	FGF12	GRIN2A	INPP4A	CALM3	CALM1	FGF1
	CACNA1I	ACTN2	CACNB1	ACTN2	ACTN2	PSMB1	GHR	ATP5G1	JUN	HSPA2	ATP5G3	COX5A	ATP5G3	ATP5G3	ATP5G3			EIF4EBP1	FIGF	CYBB	PTK2	ARHGEF7	ATP5G3	IDH2	DLD	ARPC5L	GNA12	NDUFA12	NDUFB10	RET	CTH	PAK2		PAX8	CD8A	CYP1B1	TPI1	FGF12	PAK3	FGF2	HTR2A	ITPKA	INPP4A	CALM3	FGF12
	CALM3	EGFR	ECSIT	APC	CREBBP	PSMB4	IL15	ATP5G3	ACTG1	HSPA8	ATP5H	COX5B	ATP5H	ATP5H	ATP5H			IKBKB	FLT1	GRLF1	RGS3	GRLF1	ATP5J	IDH3A	GRHPR	BRAF	MAP4K4		NDUFC1	TPM3	LDHA	RPS6KA5		RET	PAK2			FGF2	PRKCB	FGFR3	S1PR1	ITPKB	ITPKA	CAMK2A	FGF2
	CD38	FN1	EGFR	EGFR	CSNK2A1	PSMC6	IL6ST	ATP5H	PPP1CB	JUN	ATP5J	COX6C	ATP5J	ATP5J	ATP5J			INSR	GRLF1	PIK3R1	SEMA3C	ITGB6	ATP6V1C1	IDH3G	MDH1	CFL2	PAK1		NDUFV3	TPR	NADK							FGFR3	SPP1	HSP90AB1		MAN1A1	ITPKB	ERBB3	FGFR3
	EGFR	ITGB6	FGF1	FGF1	CTNNA1	PSMD4	JAK2	ATP5J	PRKCB	MAP2K1	COX4I1	COX7A2	CALM3	COX4I1	COX4I1			PHKA1	ITGB6	PTK2	SEMA4F	PIK3R1	ATP6V1F	MDH1	ME2	GNA12	PAK2		SDHC		NNMT							GNG12	VWF	STAT1		PIK3C2A	PIK3C2A	GNAQ	GNG12
	ERBB4	LAMA2	FGF13	FGF13	EGFR		LEPR	BCKDHA	MAP2K1	PDGFRB	COX5A	COX7B	CASP7	COX5A	COX5A			PIK3R1	PARVB	PTPN11	SEMA6A	PIP5K1C	COX11	SDHB	PDHA1	PAK1					PRODH							HSPA2					PIP4K2A	GRIN2A	PAK1
	HTR2A	MAPK1	KRAS	FN1	IQGAP1		LIFR	BPGM		PRKACA	COX5B	COX7C	COX4I1	COX5B	COX5B			PRKAG1	PDGFC			PTK2	COX7B	SDHC	PDHB	PAK2					PTGDS							MAPK9					PRKCB	HTR2A	PAK3
	PLCG2	PAK2	MAP3K4	GSN	MAPK1		PIAS1	CKMT2		PRKCB	COX6C	UQCRB	COX5A	COX6C	COX6C			RHOQ	PGF			RRAS2	COX7C	SUCLA2	PDHX						TPI1							MAPT						ITPKA	PIP4K2A
	PLN	PDGFC	MAP4K3	IQGAP1	SMAD4		PIK3R1	COX4I1			COX7A2	UQCRC2	COX5B	COX7A2	COX7A2			SLC2A4	PIK3R1				CYC1															MEF2C						ITPKB	RDX
	PPP3CC	PDGFD	MAPK1	ITGB6	SORBS1		PTPN11	COX5A			COX7B	UQCRFS1	COX6C	COX7B	COX7B				PIP5K1C				NDUFA8															PAK1						PRKCB
	SLC25A6	PIK3R1	MAPT	KRAS	TCF7L2		SOCS2	COX5B			COX7C	UQCRH	COX7A2	COX7C	COX7C				PTK2				NDUFA9															PRKCB
	TACR1	PPP1CB	NF1	MAPK1	YES1		SOCS5	COX6C			CYCS		COX7B	NDUFA6	CYCS				VEGFA				NDUFB5
	TNNC1	PPP1R12A	PAK2	PAK2			SOS1	COX7B			NDUFA6		COX7C	NDUFAB1	NDUFA6								NDUFS1
		PTK2	PPM1B	PIK3R1			STAM	COX7C			NDUFAB1		CYCS	NDUFB3	NDUFAB1								NDUFS3
		RAP1A	PPP3CC	PPP1CB			STAT3	DLAT			NDUFB3		NDUFA6	NDUFB5	NDUFB3								NDUFS8
		SOS1	RAP1A	PPP1R12A				DLD			NDUFB5		NDUFAB1	NDUFB8	NDUFB5								NDUFV2
		VEGFC	RAPGEF2	PTK2				FH			NDUFB8		NDUFB3	NDUFS2	NDUFB8								PPA1
			SOS1	RDX				GATM			NDUFS2		NDUFB5	NDUFS3	NDUFS2								SDHB
			TAOK3	SOS1				GOT1			NDUFS3		NDUFB8	SDHC	NDUFS3								SDHC
KEGG Pathway/Gene Description	Class/GeneID	OT p-value/Gene p-value	Enrichment	p-value	FDR	Fold Change (log2) old_w vs young_w	Fold Change (natural) old_w vs young_w	Affy_Set_ID	up_down_old_vs_young	#up	#down
Insulin signaling pathway - Homo sapiens (human)	Organismal Systems; Endocrine System	0.00087505	10/125							2	8
eukaryotic translation initiation factor 4E	EIF4E	0.00045		0.00045	0.00907	-0.38435	0.76613	201435_s_at	down
inhibitor of kappa light polypeptide gene enhancer in B-cells, kinase beta	IKBKB	0.00281		0.00281	0.02488	-0.26753	0.83074	209342_s_at	down
eukaryotic translation initiation factor 4E binding protein 1	EIF4EBP1	0.00101		0.00101	0.01635	-0.42628	0.74418	221539_at	down
solute carrier family 2 (facilitated glucose transporter), member 4	SLC2A4	0.00416		0.00416	0.02898	-0.41568	0.74966	206603_at	down
ras homolog gene family, member Q	RHOQ	0.00102		0.00102	0.0163	-0.27998	0.8236	212120_at	down
insulin receptor	INSR	0.00798		0.00798	0.0388	0.43348	1.35049	213792_s_at	up
phosphorylase kinase, alpha 1 (muscle)	PHKA1	0.00112		0.00112	0.01655	-0.52213	0.69634	205450_at	down
phosphoinositide-3-kinase, regulatory subunit 1 (p85 alpha)	PIK3R1	0.00149		0.00149	0.01856	0.42734	1.34475	212239_at	up
v-raf murine sarcoma 3611 viral oncogene homolog	ARAF	0.01114		0.01114	0.04577	-0.26694	0.83108	201895_at	down
protein kinase, AMP-activated, gamma 1 non-catalytic subunit	PRKAG1	0.01019		0.01019	0.04349	-0.3783	0.76934	201805_at	down

## Sheet: KEGGs_summary_table
Over-represented KEGG pathways in nervous and skeletal muscle tissues during in vivo ageing (summary table)
KEGG PATHWAY	Tissue	OT p-value/Gene p-value	Enrichment	%Enrichment	#UP	#DOWN
Adherens junction	muscle	2.31163e-05	13/75	17.3333	13	0
Alzheimer's disease	muscle	2.65543e-12	27/131	20.6107	0	27
Axon guidance	muscle	0.0152195	7/113	6.19469	1	6
Calcium signaling pathway	muscle	0.0221873	14/165	8.48485	10	4
Calcium signaling pathway	nervous	4.98305e-07	11/151	7.28477	2	9
Cardiac muscle contraction	muscle	1.74372e-12	12/56	21.4286	1	11
Citrate cycle (TCA cycle)	muscle	6.92919e-10	9/25	36	0	9
Focal adhesion	muscle	0.00322525	18/186	9.67742	15	3
Focal adhesion	muscle	0.000889429	13/186	6.98925	5	8
Focal adhesion	muscle	0.0154645	7/181	3.8674	3	4
Focal adhesion	nervous	2.1619e-06	6/197	3.04569	2	4
Focal adhesion	muscle	0.0130458	2/197	1.01523	1	1
Glycolysis / Gluconeogenesis	muscle	1.66304e-05	3/61	4.91803	1	2
Huntington's disease	muscle	3.76468e-11	25/136	18.3824	0	25
Insulin signaling pathway	muscle	0.00087505	10/125	8	2	8
Jak-STAT signaling pathway	muscle	0.000811299	16/140	11.4286	14	2
Leukocyte transendothelial migration	muscle	0.0112152	7/107	6.54206	3	4
MAPK signaling pathway	muscle	0.0112711	20/239	8.3682	16	4
MAPK signaling pathway	muscle	0.00576264	6/108	5.55556	1	5
MAPK signaling pathway	nervous	9.93461e-11	12/263	4.56274	5	7
MAPK signaling pathway	muscle	0.00610871	9/221	4.0724	4	5
MAPK signaling pathway	muscle	0.0486055	2/108	1.85185	2	0
MAPK signaling pathway	muscle	0.000516711	4/263	1.52091	2	2
Metabolic pathways	muscle	5.33847e-11	40/746	5.36193	2	38
Metabolic pathways	muscle	0.000257028	9/1031	0.872939	4	5
Metabolic pathways	nervous	0.0336651	6/1031	0.581959	2	4
Metabolism of xenobiotics by cytochrome P450	muscle	1.18172e-05	3/56	5.35714	3	0
Neuroactive ligand-receptor interaction	nervous	0.000994786	4/255	1.56863	1	3
Oxidative phosphorylation	muscle	1.03539e-11	24/88	27.2727	0	24
Oxidative phosphorylation	muscle	9.79338e-11	25/104	24.0385	0	25
Oxidative phosphorylation	muscle	2.33717e-05	6/44	13.6364	0	6
Parkinson's disease	muscle	2.16206e-11	25/90	27.7778	0	25
Pathways in cancer	nervous	3.10618e-05	6/297	2.0202	3	3
Pathways in cancer	muscle	0.000102041	5/297	1.6835	3	2
Phosphatidylinositol signaling system	nervous	1.23753e-07	8/65	12.3077	3	5
Proteasome	muscle	0.000798356	6/31	19.3548	6	0
Pyruvate metabolism	muscle	5.48018e-08	9/37	24.3243	0	9
Regulation of actin cytoskeleton	muscle	0.000650804	20/188	10.6383	17	3
Regulation of actin cytoskeleton	muscle	0.000262824	8/106	7.54717	1	7
Regulation of actin cytoskeleton	nervous	4.30906e-06	10/154	6.49351	6	4
Regulation of actin cytoskeleton	muscle	0.0423987	9/188	4.78723	2	7
T cell receptor signaling pathway	muscle	6.7471e-06	4/105	3.80952	2	2
Thyroid cancer	muscle	1.21128e-09	4/20	20	2	2
Tight junction	muscle	0.0142382	2/67	2.98507	2	0
Ubiquinone and other terpenoid-quinone biosynthesis	muscle	1.52594e-07	3/4	75	0	3
