# Supplementary material for: Comparative Meta-Analysis of Transcriptomics Data during Cellular Senescence and In Vivo Tissue Ageing
Source: Oxid Med Cell Longev. 2015 Apr 21;2015:732914. doi: 10.1155/2015/732914 (PMC4419258; doi:10.1155/2015/732914)
Supplement: Supplementary file 1 — Supplementary material includes five (5) excel files termed as Supplementary Tables S1-S5. The S1 file includes one (1) spreadsheet; a summary Table of analyzed transcriptomics data and experimental conditions. The S2 file includes nine (9) spreadsheets: (1) a list of 390 fully annotated DEGs extracted from Statistical analysis (p-value≤0.05, FDR≤0.05, F.C filtering >0.26 and <-0.26, in log2 scale) of nervous tissue; (2) a list of DEGs in nervous tissue with gene expression-fold change >=1.5 fold; (3) a summary Table with the results of functional analysis of DEGs in nervous tissue by "Stranger" based on GO terms; the (4), (5), (6) Tables with the results of functional analysis of DEGs in nervous tissue with "Stranger" based on Cellular Location, Function and Biological Process of GO tree, respectively; (7) a list of DEGs enriched in Functions and Biological Processes found to be overrepresented in nervous tissue transcriptomics data; (8) a Table with the genes and GO terms associated with DEGs enriched in Biological Processes found to be over-represented in nervous tissue transcriptomics data - "Gorevenge output"; (9) a list of DEGs in nervous tissue transcriptomic data characterized as hub-genes from "Gorevenge" (in a descending order of linked GO terms). The S3 file includes seven (7) spreadsheets: the (1), (2) Tables with the enrichment score of Functions and Biological Processes over-represented in males muscle tissue, respectively (the number of enriched up- or down-regulated genes is also shown); the (3), (4) Tables with the enrichment score of Functions and Biological Processes over-represented in females muscle tissue, respectively (the number of enriched up- or down-regulated genes is also shown); (5) a list of genes enriched in over-represented Biological Processes of females muscle tissue with the common genes and Biological Processes to be highlighted; (6) a Table with the enriched up- or down- regulated genes in over-represented Biological Processes of [file 732914.f1.zip › 732914.f1/732914 Voutetakis_et_al_Suppl_Table_S5.xls]

## Sheet: Gene_index
Table S5: Full name of genes being cited in the manuscript
GeneID	Gene name
ACTA1	actin, alpha 1, skeletal muscle
AKT	serine/threonine protein kinase Akt
ANK2	ankyrin 2, neuronal
ANP32A	hepatopoietin PCn127; acidic (leucine-rich) nuclear phosphoprotein 32 family, member A
ANP32E	acidic (leucine-rich) nuclear phosphoprotein 32 family, member E
ARAF	serine/threonine protein kinase ARAF
ATP2B2	ATPase, Ca++ transporting, plasma membrane 2
ATP5B	ATP synthase, H+ transporting, mitochondrial F1 complex, beta polypeptide
C1QBP	complement component 1, q subcomponent binding protein
CACNB2	calcium channel, voltage-dependent, beta 2 subunit
CALB1	calbindin 1, 28kDa
CASP7	caspase 7, apoptosis-related cysteine peptidase
CLTB	clathrin, light polypeptide B (light chain B)
COX5A	cytochrome c oxidase subunit 5A
COX5B	cytochrome c oxidase subunit Vb
COX6C	cytochrome c oxidase subunit VIc
DDX3X	DEAD (Asp-Glu-Ala-Asp) box polypeptide 3, X-linked
DYNC1I1	dynein cytoplasmic 1 intermediate chain 1
EGFR	epidermal growth factor receptor (erythroblastic leukemia viral (v-erb-b) oncogene homolog, avian)
EIF4E	eukaryotic translation initiation factor 4E
EIF4EBP1	eukaryotic translation initiation factor 4E binding protein 1
FBN2	fibrillin 2
FOXO	forkhead transcription factor O
GABAA	ionotropic receptor and ligand-gated ion channel of γ-aminobutyric acid
GJA1	gap junction protein, alpha 1, 43kDa
GRIN2A	glutamate receptor, ionotropic, N-methyl D-aspartate 2A
HSPA2	heat shock 70kDa protein 2
HTR2A	5-hydroxytryptamine (serotonin) receptor 2A
IKBKB	inhibitor of kappaB kinase beta
INSR	insulin receptor
KCNAB1	potassium voltage-gated channel, shaker-related subfamily, beta member 1
KIF1B	cortistatin; kinesin family member 1B
KLHDC3	kelch domain containing 3
LITAF	lipopolysaccharide-induced TNF factor
MAP1B	microtubule-associated protein 1B
MAP2	microtubule-associated protein 2
MAP2K1	mitogen-activated protein kinase kinase 1
MAP3K4	mitogen-activated protein kinase kinase kinase 4
MAP4K3	mitogen-activated protein kinase kinase kinase kinase 3
MAPK1	mitogen-activated protein kinase 1
MAPT	microtubule-associated protein tau
MEF2C	myocyte enhancer factor 2C
mTORC1	mammalian target of rapamycin complex 1
NDUFA8	NADH dehydrogenase (ubiquinone) 1 alpha subcomplex, 8, 19kDa
NDUFA9	NADH dehydrogenase (ubiquinone) 1 alpha subcomplex, 9, 39kDa
NDUFB5	NADH dehydrogenase (ubiquinone) 1 beta subcomplex, 5, 16kDa
NDUFS1	NADH dehydrogenase (ubiquinone) Fe-S protein 1, 75kDa (NADH-coenzyme Q reductase)
NFE2L2	nuclear factor (erythroid-derived 2)-like 2
NUP50	nucleoporin 50kDa
PAK1	p21 protein (Cdc42/Rac)-activated kinase 1
PAK3	p21 protein (Cdc42/Rac)-activated kinase 3
PDGF	platelet-derived growth factor beta
PDIA6	protein disulfide isomerase family A, member 6
PHKA1	phosphorylase kinase alpha 1
PICALM	phosphatidylinositol binding clathrin assembly protein
PIK3C2A	phosphoinositide-3-kinase, class 2, alpha polypeptide
PIK3R1	phosphoinositide-3-kinase, regulatory subunit 1 (alpha)
PRKAG1	AMPK-activated protein kinase gamma-1 subunit
PRKCB	protein kinase C, beta
PTTG1	pituitary tumor-transforming 1
RAN	RAN, member RAS oncogene family
RHOQ	ras homolog gene family, member Q; similar to small GTP binding protein TC10
SCAMP5	secretory carrier membrane protein 5
SDH	Serine 3-dehydrogenase
SDHB	succinate dehydrogenase complex, subunit B, iron sulfur (Ip); similar to succinate dehydrogenase Ip subunit
SDHC	succinate dehydrogenase complex, subunit C, integral membrane protein
SEPP1	selenoprotein P, plasma, 1
SERBP1	SERPINE1 mRNA binding protein 1
SERINC5	serine incorporator 5
SET	similar to template activating factor-I alpha; SET nuclear oncogene;
SLC2A4	solute carrier family 2 (facilitated glucose transporter), member 4
SYN2	synapsin II
TGF-β	transforming growth factor, beta
TGOLN2	trans-golgi network protein 2
TOP2B	topoisomerase (DNA) II beta 180kDa
TXN	thioredoxin
UPP1	uridine phosphorylase 1
UQCRB	ubiquinol-cytochrome c reductase binding protein
UQCRC1	ubiquinol-cytochrome c reductase core protein 1
UQCRH	ubiquinol-cytochrome c reductase hinge protein
VEGF	vascular endothelial growth factor
